# Supplementary material
Source: publisher figshare collection journal article supplement (https://gsapubs.figshare.com/articles/dataset/_/12529988)
Supplement: Supplementary file 1 [file 1]

APPENDIX TABLE: Major- and Trace-element analyses of Stratigraphic Sections

ABERT RIM POWERLINE ROAD SECTION:

| SAMPLE   | SiO[2] | Al[2]O[3] | FeO   | CaO   | MgO   | K[2]O | Na[2]O | MnO   | TiO[2] | P[2]O[5] | Sc   | V     | Cr    | Co   | Ni    | Cu    | Zn    | Rb   | Sr    | Y    | Zr    | Nb   | Mo  | Ba    | La   | Ce   | Nd   | Sm   | Yb  | Hf  | Pb   | Th   | U    |     |
|----------|--------|-----------|-------|-------|-------|-------|--------|-------|--------|----------|------|-------|-------|------|-------|-------|-------|------|-------|------|-------|------|-----|-------|------|------|------|------|-----|-----|------|------|------|-----|
| CR6-618  | 48.19  | 15.29     | 13.21 | 8.91  | 5.006 | 1.194 | 3.34   | 0.203 | 2.739  | 0.496    | 30.4 | 356.4 | 43.4  | 36.3 | 67.5  | 265.8 | 110.2 | 20.9 | 467.4 | 41   | 210.9 | 11.5 | 1.6 | 422.9 | 11.5 | 55   | 34.9 | 5.7  | 4.7 | 5.8 | 2.6  | 3.6  | 1.4  |     |
| CR6-618A | 48.32  | 14.85     | 13.37 | 8.9   | 4.966 | 1.217 | 3.31   | 0.202 | 2.814  | 0.529    | 31.9 | 366.1 | 44.5  | 37.2 | 69.5  | 287.3 | 112.1 | 21   | 458.8 | 43.8 | 221.7 | 11.8 | 1.5 | 422.4 | 18   | 59.4 | 37.4 | 8.8  | 5.7 | 6.6 | 1.9  | 0.7  | 0.8  |     |
| CR6-618B | 49.07  | 16.48     | 11.86 | 9.32  | 4.344 | 1.166 | 3.38   | 0.185 | 2.52   | 0.476    | 29.7 | 372.5 | 36.9  | 39.2 | 64.3  | 174.1 | 107.7 | 18.9 | 509.8 | 38.6 | 200   | 10.7 | 1.8 | 440.5 | 16.1 | 50.4 | 33.1 | 6.5  | 5.6 | 6.8 | 2    | 1.8  | 1.8  |     |
| CR6-618C | 48     | 14.67     | 13.78 | 8.86  | 4.622 | 1.181 | 3.2    | 0.203 | 2.865  | 0.525    | 34.4 | 416.9 | 44.4  | 41.1 | 67.6  | 241.7 | 124.5 | 19.4 | 444.2 | 43.4 | 220.5 | 12.2 | 1.8 | 474.6 | 17.2 | 61.6 | 36.9 | 10.5 | 5.1 | 5.6 | 4    | 2.2  | 2    |     |
| CR6-619  | 48.57  | 16.41     | 10.62 | 10.58 | 6.855 | 0.736 | 2.93   | 0.19  | 1.51   | 0.268    | 27.7 | 254.1 | 175.6 | 43.4 | 131.5 | 139.5 | 79.3  | 5.8  | 527   | 22   | 103.7 | 5.7  | 1.6 | 295.4 | 10.4 | 30.1 | 18.5 | 4.6  | 4   | 3.8 | -0.3 | 1.8  | 1.7  |     |
| CR6-620  | 48.65  | 16.42     | 10.7  | 10.74 | 6.92  | 0.639 | 2.87   | 0.185 | 1.522  | 0.272    | 28.3 | 249.2 | 180.8 | 45.3 | 122.5 | 121.2 | 82.5  | 5.7  | 526.2 | 23.8 | 101.1 | 5.4  | 1.5 | 269.9 | 10.4 | 25.9 | 17.1 | 3.6  | 3.2 | 3.2 | -1.5 | 1.5  | 1.4  |     |
| CR6-621  | 48.32  | 16.39     | 10.75 | 10.72 | 7.064 | 0.641 | 2.89   | 0.174 | 1.512  | 0.268    | 28.1 | 237.2 | 183.7 | 42.3 | 128.6 | 158   | 79.2  | 5.2  | 536   | 22.1 | 108.6 | 5.5  | 2.2 | 268.3 | 6.8  | 25.6 | 15.8 | 2.8  | 3.8 | 4.5 | 4.2  | -0.1 | 1.9  | 1.7 |
| CR6-622  | 48.43  | 16.86     | 11.73 | 9.65  | 5.299 | 0.876 | 3.31   | 0.179 | 2.162  | 0.392    | 27.7 | 310.9 | 87.5  | 42.8 | 99.9  | 206.5 | 99.6  | 11.9 | 543.8 | 31   | 159.5 | 8.7  | 1.9 | 337.5 | 10.9 | 35.7 | 24.7 | 5.2  | 2.6 | 4.9 | 0.4  | 2.5  | 2.2  |     |
| CR6-623  | 48.72  | 17.77     | 11.51 | 9.91  | 5.371 | 0.844 | 3.28   | 0.191 | 1.74   | 0.322    | 26.6 | 275.3 | 39.6  | 39.2 | 67.1  | 161.8 | 77    | 13   | 564.3 | 24.2 | 112.1 | 5.5  | 1.8 | 360.5 | 17   | 29.8 | 19.5 | 1.3  | 3.9 | 3.6 | -1.8 | 1.8  | 1    |     |
| CR6-624  | 47.2   | 17.38     | 11.11 | 10.86 | 5.282 | 0.809 | 3.18   | 0.18  | 1.663  | 0.305    | 35.1 | 188.2 | 32.6  | 20   | 55.7  | 139.6 | 67.8  | 11.5 | 509.2 | 21.3 | 99    | 5.6  | 3.7 | 191.4 | 5.7  | 20.6 | 13.9 | 4.6  | 3.4 | 4   | -0.5 | 4.4  | 1.7  |     |
| CR6-625  | 48.56  | 15.78     | 12.91 | 8.62  | 4.659 | 1.367 | 3.5    | 0.197 | 2.818  | 0.538    | 25.4 | 332.5 | 23.6  | 29.6 | 58.6  | 263.5 | 105.9 | 23.3 | 525.7 | 42   | 221.8 | 12.1 | 1.6 | 433.6 | 19.9 | 62.2 | 38.6 | 8.8  | 7.6 | 7.4 | 2.1  | 2.2  | 1.6  |     |
| CR6-626  | 48.27  | 15.46     | 13.21 | 8.57  | 4.805 | 1.301 | 3.46   | 0.201 | 2.864  | 0.526    | 26.3 | 343.3 | 25    | 27.7 | 57.8  | 280.5 | 106.1 | 20   | 513.5 | 41.5 | 221.1 | 11.8 | 1.6 | 424.9 | 29.2 | 58   | 37.2 | 7.1  | 6.2 | 6.7 | 1.5  | 1.9  | 0.6  |     |
| CR6-627  | 47.88  | 14.81     | 13.66 | 8.36  | 4.896 | 1.327 | 3.4    | 0.198 | 2.979  | 0.552    | 29.5 | 368   | 30.4  | 32.8 | 62.4  | 315   | 114.9 | 19.4 | 485.5 | 42.6 | 233.5 | 12.6 | 1.8 | 441.1 | 18.9 | 67   | 39.8 | 8.6  | 4.1 | 7   | 2.7  | 1.5  | 1.3  |     |
| CR6-628  | 48.25  | 15.13     | 13.36 | 8.42  | 4.862 | 1.368 | 3.5    | 0.204 | 2.925  | 0.591    | 28.4 | 381.9 | 32.6  | 36.3 | 62.2  | 305.1 | 114   | 20.2 | 481.7 | 43.2 | 230.1 | 12.6 | 1.8 | 449.1 | 26   | 60.6 | 36.8 | 10.7 | 5.9 | 6.7 | 3    | 1.8  | 1.9  |     |
| CR6-629  | 48.18  | 14.76     | 13.33 | 8.73  | 4.833 | 1.274 | 3.31   | 0.199 | 2.87   | 0.539    | 33.5 | 429   | 43.4  | 43.9 | 63.9  | 268   | 122.4 | 22.5 | 457   | 43   | 225.6 | 12.8 | 1.5 | 490.2 | 19.7 | 58.9 | 36.9 | 8.6  | 5.2 | 6.9 | 2.7  | 4.2  | 1.5  |     |
| CR6-630  | 48.14  | 15        | 13.47 | 8.74  | 5.172 | 1.205 | 3.28   | 0.201 | 2.791  | 0.508    | 29   | 383.3 | 47.6  | 35.5 | 68    | 272.4 | 115   | 20.7 | 462.5 | 41.2 | 215.9 | 11.8 | 1.8 | 438   | 16.6 | 61.4 | 36.5 | 10   | 6.4 | 6   | 3.1  | 2.7  | 1.6  |     |
| CR6-631  | 48.03  | 14.75     | 13.69 | 8.67  | 5.154 | 1.259 | 3.35   | 0.203 | 2.872  | 0.511    | 31.7 | 337.7 | 45.5  | 35.3 | 70.1  | 303.9 | 114.5 | 21.8 | 459.4 | 42.4 | 225.4 | 11.8 | 1.4 | 470.6 | 14.8 | 57.6 | 36   | 10.9 | 5   | 5.8 | 3    | 0.3  | -0.1 |     |
| CR6-632  | 47.51  | 16.99     | 11.32 | 10.07 | 6.044 | 0.592 | 2.97   | 0.2   | 1.655  | 0.258    | 25   | 302.4 | 63.6  | 53   | 156.3 | 155.3 | 93.3  | 7.1  | 467.9 | 25.5 | 119.5 | 5.5  | 2   | 366.9 | 10.4 | 20   | 15.8 | 5    | 3.4 | 4.3 | 1.1  | 2.3  | 1.6  |     |

ADEL SECTION:

| SAMPLE    | SiO[2] | Al[2]O[3] | FeO   | CaO   | MgO   | K[2]O | Na[2]O | MnO   | TiO[2] | P[2]O[5] | Sc   | V     | Cr    | Co   | Ni    | Cu    | Zn   | Rb  | Sr    | Y    | Zr    | Nb  | Mo   | Ba    | La   | Ce   | Nd   | Sm   | Yb  | Hf  | Pb   | Th  | U    |
|-----------|--------|-----------|-------|-------|-------|-------|--------|-------|--------|----------|------|-------|-------|------|-------|-------|------|-----|-------|------|-------|-----|------|-------|------|------|------|------|-----|-----|------|-----|------|
| CR04-553  | 45.16  | 14.91     | 10.53 | 9.95  | 9.41  | 0.82  | 1.97   | 0.155 | 1.918  | 0.178    | 23.3 | 285   | 331.2 | 60   | 189.8 | 76.4  | 79.1 | 7.4 | 469.6 | 19.6 | 97    | 6.2 | -0.2 | 210   | 7.6  | 25   | 14.4 | 2.6  | 4.8 | 5   | -2.4 | 1.5 | 1    |
| CR04-554  | 45.48  | 14.51     | 11.18 | 9.94  | 10.09 | 0.58  | 2.08   | 0.166 | 2.079  | 0.186    | 25.8 | 260.7 | 336   | 61.5 | 210.3 | 152.1 | 83   | 4.9 | 385.1 | 20.8 | 98.2  | 6.7 | 0.1  | 171.4 | 3.3  | 28.2 | 15.9 | 4.6  | 5.7 | 4.1 | -2.3 | 0.8 | -0.4 |
| CR04-555  | 46.14  | 14.66     | 11.33 | 10.75 | 10.27 | 0.45  | 2.17   | 0.168 | 1.98   | 0.186    | 27.8 | 276   | 382.2 | 64   | 208.6 | 103.5 | 85.6 | 4.1 | 394.9 | 20.1 | 91.7  | 6.8 | 0.2  | 183.1 | 3.7  | 27.2 | 17.2 | 3.7  | 3.5 | 3   | -1.7 | 1.1 | 0.1  |
| CR04-556  | 45.87  | 15.22     | 12.15 | 9.96  | 8.73  | 0.62  | 2.31   | 0.187 | 1.877  | 0.245    | 27.1 | 292   | 226.4 | 61.2 | 172.2 | 141.1 | 87.7 | 4.5 | 568.9 | 24.3 | 120.3 | 5.6 | 0.1  | 187.4 | 12.2 | 27.7 | 16   | 4.2  | 5.5 | 4.6 | -3.9 | 3.2 | -0.9 |
| CR04-557  | 45.49  | 13.15     | 11.49 | 10.1  | 11.61 | 0.41  | 1.93   | 0.187 | 1.427  | 0.182    | 29.3 | 232.6 | 387   | 72   | 276.9 | 118   | 82   | 4.6 | 310.3 | 21.3 | 91.7  | 5.6 | -0.1 | 139.6 | 6.1  | 25.6 | 15   | 3.3  | 4.6 | 4.3 | -0.6 | 2.3 | -0.5 |
| CR04-558  | 46.39  | 14.2      | 10.9  | 10.86 | 9.67  | 0.42  | 2.11   | 0.18  | 1.485  | 0.188    | 33.8 | 269.3 | 326.2 | 58   | 181.5 | 132.7 | 77.3 | 4.5 | 331.3 | 22.3 | 93.6  | 5.7 | 0.1  | 157.6 | 9.5  | 25.3 | 18.3 | 6.9  | 6.3 | 3.1 | -0.9 | 4.4 | -1   |
| CR04-559  | 46.83  | 15.13     | 10.41 | 12    | 7.03  | 0.44  | 2.27   | 0.161 | 1.603  | 0.2      | 33.1 | 280   | 273.6 | 49.3 | 109.8 | 165.2 | 79.7 | 6.8 | 358.5 | 24.9 | 103   | 5.8 | 1.3  | 171.1 | 11.1 | 31.8 | 19.3 | 4.5  | 6.3 | 3.9 | -1.4 | 2.9 | -1.2 |
| CR04-565A | 46.28  | 14.2      | 10.73 | 10.97 | 9.37  | 0.4   | 2.05   | 0.177 | 1.447  | 0.185    | 33.6 | 274.6 | 303.4 | 60.9 | 186.5 | 133.2 | 77.7 | 7.3 | 340   | 22.3 | 94.2  | 5.8 | 0.5  | 185.9 | 10.7 | 24.2 | 16.8 | 1.7  | 2.6 | 3.9 | -1.1 | 2.6 | 0.3  |
| CR04-565B | 47.85  | 14.84     | 11.17 | 11.53 | 8.73  | 0.45  | 2.36   | 0.177 | 1.608  | 0.201    | 35.6 | 297   | 278.3 | 55.7 | 145.8 | 135.5 | 78.3 | 5   | 365   | 23.9 | 100.7 | 6   | 0.5  | 182   | 9.5  | 25.4 | 16.7 | 4.1  | 3.6 | 4.3 | -0.7 | 3.6 | -0.5 |
| CR04-566  | 47.02  | 15.45     | 11.14 | 10.28 | 8.19  | 0.53  | 2.44   | 0.175 | 1.745  | 0.226    | 28.7 | 293.9 | 131.1 | 57.9 | 157   | 127.5 | 80.9 | 5.6 | 400   | 24.2 | 112.8 | 6.6 | 0.5  | 216.6 | 6.2  | 25.1 | 20.7 | 4.6  | 2.5 | 3.8 | -1   | 3.2 | -0.4 |
| CR04-567  | 48.61  | 16.09     | 10.47 | 10.23 | 7.38  | 0.72  | 2.82   | 0.159 | 1.556  | 0.28     | 26.6 | 268.4 | 167.9 | 47.6 | 110.6 | 108.4 | 78.7 | 7.2 | 477.8 | 23.4 | 105   | 6.6 | 0.5  | 281.1 | 15.7 | 29.4 | 17.1 | -2.5 | 3.4 | 4.3 | -2.2 | 3.2 | 0.6  |
| CR04-568  | 47.2   | 16.47     | 11.59 | 9.64  | 6.9   | 0.66  | 2.94   | 0.172 | 1.805  | 0.256    | 28.2 | 279.6 | 118.9 | 50.5 | 106.6 | 175.4 | 83.5 | 8.3 | 481.4 | 24.8 | 117.8 | 6.3 | 0.3  | 275.5 | 7.2  | 27.6 | 18.2 | 3.3  | 5   | 4.1 | -2.2 | 3.7 | -0.7 |
| CR04-569  | 46.51  | 15.92     | 10.35 | 9.93  | 8.77  | 0.44  | 2.28   | 0.189 | 1.41   | 0.193    | 26.5 | 258   | 227.2 | 55.4 | 163.9 | 93.8  | 72.6 | 8.5 | 349.2 | 22.8 | 93.2  | 4   | 1.2  | 173.4 | -0.8 | 16.9 | 10.5 | 6.5  | 4.7 | 3.8 | -1.6 | 2.1 | -0.3 |
| CR04-570  | 47.34  | 16.15     | 10.05 | 10.06 | 8.13  | 0.58  | 2.44   | 0.158 | 1.456  | 0.225    | 27.1 | 240.3 | 191.1 | 53.2 | 141   | 118.2 | 71   | 7.2 | 398.5 | 20.9 | 98.3  | 6.4 | 0.5  | 332.1 | 7.7  | 17.5 | 13.1 | 4.5  | 4.6 | 4.3 | -1.4 | 4.8 | -0.2 |
| CR04-571  | 46.81  | 15.76     | 10.92 | 10.09 | 8.5   | 0.52  | 2.57   | 0.166 | 1.568  | 0.214    | 31.3 | 286.2 | 267.7 | 59.7 | 193.9 | 140.7 | 77.5 | 5.7 | 407.6 | 23   | 98.3  | 4.8 | 0.2  | 254   | 5.8  | 24.6 | 17.2 | 4    | 4.7 | 3.7 | -2.1 | 2.6 | -2.1 |

BLACK CANYON RESERVOIR SECTION:

| SAMPLE    | SiO[2] | Al[2]O[3] | FeO   | CaO   | MgO  | K[2]O | Na[2]O | MnO   | TiO[2] | P[2]O[5] | Sc   | V     | Cr    | Co   | Ni    | Cu    | Zn    | Rb    | Sr    | Y    | Zr    | Nb   | Mo   | Ba     | La   | Ce   | Nd   | Sm   | Yb   | Hf  | Pb  | Th  | U    |
|-----------|--------|-----------|-------|-------|------|-------|--------|-------|--------|----------|------|-------|-------|------|-------|-------|-------|-------|-------|------|-------|------|------|--------|------|------|------|------|------|-----|-----|-----|------|
| CR03-475  | 46.78  | 16.07     | 10.19 | 9.82  | 5.82 | 0.45  | 2.78   | 0.188 | 2.078  | 0.309    | 26.3 | 297.8 | 89.1  | 53.1 | 116.1 | 48.4  | 112.1 | 5.8   | 465.3 | 29.1 | 162.1 | 11.6 | 1.8  | 320.2  | 14.6 | 38.4 | 25   | 5.6  | 3.6  | 3.8 | 6.6 | 1.2 | 3.1  |
| CR03-475A | 49.55  | 16.2      | 10.22 | 8.82  | 4.89 | 1.09  | 3.4    | 0.171 | 1.818  | 0.476    | 24.9 | 251.2 | 75.4  | 46.5 | 68.8  | 84.2  | 93.7  | 16.7  | 479.2 | 31.2 | 158.4 | 12.4 | 0.6  | 452.9  | 18.9 | 51.3 | 27   | 4.7  | 1.7  | 3.4 | 5.6 | 3.7 | 2.4  |
| CR03-476  | 47.3   | 16.21     | 10.27 | 9.81  | 5.65 | 0.56  | 2.86   | 0.143 | 2.13   | 0.32     | 25.5 | 293.2 | 81.4  | 53.9 | 122.2 | 45.6  | 113.6 | 7     | 466.1 | 29.5 | 164.7 | 11.8 | 2.1  | 298.4  | 12.3 | 42.3 | 23.7 | 6.5  | 2.2  | 3.7 | 5.5 | 3.3 | 2.6  |
| CR03-477  | 48.86  | 15.84     | 11.06 | 9.65  | 5.82 | 0.75  | 3.04   | 0.191 | 2.068  | 0.336    | 28.7 | 287.1 | 57.2  | 54.9 | 80.6  | 30.3  | 110.9 | 15.9  | 512.6 | 28   | 154.3 | 10.8 | 1.2  | 300.4  | 13.4 | 44.6 | 24.3 | 5.8  | 1    | 2.8 | 3.5 | 3   | 1.9  |
| CR03-478  | 48.08  | 15.61     | 11.36 | 9.72  | 5.78 | 0.64  | 2.98   | 0.154 | 2.087  | 0.35     | 24.8 | 250.2 | 49.4  | 53.8 | 105.7 | 44    | 107.6 | 11.6  | 501.1 | 28.5 | 151.7 | 10.8 | 1    | 228.5  | 10.4 | 41.7 | 22.8 | 6    | -0.5 | 2.3 | 3.4 | 3   | 1.8  |
| CR03-479  | 47.29  | 15.55     | 10.91 | 9.37  | 6.63 | 0.59  | 2.88   | 0.169 | 2.046  | 0.333    | 22.8 | 265.4 | 51    | 54.6 | 107.6 | 42.9  | 111.1 | 11.7  | 459.1 | 27.9 | 145.9 | 10.7 | 2.1  | 230.5  | 14.4 | 39.4 | 21.4 | 3.9  | 1.4  | 2.3 | 5.8 | 2   | 2.5  |
| CR03-480  | 50.92  | 15.82     | 9.92  | 9.08  | 5.48 | 0.82  | 3.15   | 0.186 | 1.559  | 0.266    | 28   | 272.7 | 68.2  | 50.3 | 91.6  | 126.6 | 87.7  | 12.9  | 404.3 | 27.7 | 142.8 | 11   | 0.7  | 374.1  | 11.8 | 34.2 | 20   | 4.1  | 2.7  | 3.2 | 5   | 3.8 | 2.5  |
| CR03-481  | 48.58  | 16.13     | 9.67  | 9.53  | 5.14 | 0.47  | 2.92   | 0.147 | 1.574  | 0.265    | 30.1 | 284.8 | 69.2  | 52.4 | 101.9 | 123   | 91.5  | 6.8   | 432.4 | 28.3 | 144.7 | 11   | 1.5  | 387.3  | 17.2 | 39.1 | 20.7 | 2.7  | 2.4  | 3.1 | 7.1 | 3.1 | 3.5  |
| CR03-482  | 48.69  | 16.45     | 9.74  | 10.65 | 5.11 | 0.5   | 2.96   | 0.19  | 1.724  | 0.294    | 33.2 | 332.6 | 177.3 | 52.7 | 119.3 | 127.7 | 97.2  | 4.3   | 447.5 | 28.7 | 129.7 | 8.5  | 0.5  | 284.8  | 12   | 30.1 | 19.1 | 5.1  | 1.4  | 2.5 | 3.8 | 1.5 | 1.7  |
| CR03-483  | 47.08  | 15.45     | 10.64 | 9.76  | 6.39 | 0.51  | 2.69   | 0.158 | 1.656  | 0.274    | 32.9 | 282.9 | 168.5 | 51.4 | 121.1 | 97    | 92.6  | 8.1   | 403.4 | 27.8 | 123.2 | 7.9  | 1.7  | 247.5  | 18.1 | 31.7 | 18.7 | 2.9  | 3    | 1.7 | 6.5 | 1.1 | 3.5  |
| CR03-484  | 47.55  | 15.58     | 10.53 | 9.58  | 6.31 | 0.97  | 2.67   | 0.182 | 1.689  | 0.282    | 30.9 | 301   | 180.5 | 54.7 | 116.8 | 125.3 | 95.1  | 11.2  | 478.7 | 28.2 | 127.5 | 8.5  | 0.5  | 610.8  | 8    | 29.6 | 17.8 | 3.8  | 1.8  | 3.3 | 1.6 | 4.6 | -0.1 |
| CR03-485  | 47.21  | 15.48     | 12.47 | 8.12  | 4.47 | 1.05  | 3.17   | 0.188 | 2.936  | 0.51     | 22.4 | 263.3 | 28    | 50.7 | 111.7 | 80.1  | 114.6 | 23.4  | 479.9 | 35.8 | 237.5 | 16.9 | 0.9  | 370.3  | 24   | 59.9 | 35.6 | 10.4 | 1.2  | 4.4 | 4.7 | 3.1 | 0.4  |
| CR03-486  | 47.74  | 17.07     | 11.34 | 8.98  | 3.77 | 0.86  | 3.44   | 0.205 | 2.705  | 0.473    | 19.2 | 250.5 | 15.8  | 51.2 | 90.1  | 87.5  | 105.9 | 10.1  | 540.1 | 35.1 | 222.3 | 15.6 | 0.7  | 396.7  | 15.6 | 59.4 | 38.1 | 6.4  | 2    | 6.6 | 2.7 | 3.5 | 0.4  |
| CR03-487  | 49.03  | 20.2      | 7.77  | 10.47 | 3.92 | 0.52  | 3.21   | 0.119 | 1.341  | 0.236    | 21.4 | 215.3 | 62.9  | 39.7 | 78.8  | 77.3  | 61.5  | 4     | 506.6 | 21.7 | 112   | 7.8  | 0.5  | 243.1  | 6.9  | 25.5 | 15.3 | 3.9  | 2.7  | 3.4 | 2.4 | 5.4 | 1.9  |
| CR03-488  | 46.96  | 18.53     | 10.05 | 9.04  | 4.65 | 1.09  | 2.91   | 0.175 | 1.749  | 0.29     | 23.7 | 247.2 | 26.4  | 48.2 | 88.5  | 86.3  | 86    | 14.3  | 566.9 | 27   | 138.4 | 7.8  | -0.1 | 804.7  | 14.3 | 32.5 | 19.8 | 4.8  | 0.5  | 3.7 | 2.6 | 3.4 | 0.5  |
| CR03-489  | 48.75  | 17.87     | 10.14 | 9.67  | 4.77 | 0.58  | 3.2    | 0.164 | 1.695  | 0.293    | 24.7 | 244.3 | 39.2  | 48.1 | 85.2  | 126.3 | 83.9  | 7.8   | 443.8 | 27.2 | 137.4 | 8.6  | 1    | 297.8  | 11.3 | 27.9 | 18.3 | 4    | 2.4  | 2.9 | 3.7 | 3.5 | 1.3  |
| CR03-490  | 48.32  | 19.7      | 8.21  | 10.36 | 3.82 | 0.36  | 3.22   | 0.149 | 1.444  | 0.246    | 22.6 | 206   | 51.6  | 41   | 75.2  | 92.8  | 67.7  | 1.7   | 492   | 23.7 | 119.9 | 7.4  | 0.3  | 262.5  | 12.6 | 33.1 | 19   | 0.6  | 0.9  | 3.4 | 2.5 | 3.5 | 1.3  |
| CR03-491  | 51.19  | 16.67     | 9.24  | 8.31  | 3.13 | 1.42  | 3.65   | 0.18  | 1.898  | 0.543    | 26.4 | 248.7 | 44.7  | 40.3 | 56    | 123.9 | 88.1  | 34.7  | 516   | 33.3 | 180.8 | 14.9 | 0.8  | 544.9  | 22   | 54.4 | 30.3 | 5.2  | 1.4  | 4.5 | 5.4 | 4.5 | 1.1  |
| CR03-492  | 47.41  | 17.42     | 10.25 | 9.59  | 3.87 | 0.62  | 3.17   | 0.121 | 1.829  | 0.442    | 29.6 | 268.5 | 70.6  | 44.2 | 67.4  | 104.1 | 98.8  | 5.3   | 531.9 | 30.8 | 157.4 | 11.7 | -0.1 | 454    | 18.5 | 50.2 | 26.9 | 6.8  | 2.1  | 4.8 | 3.5 | 3.7 | 0.2  |
| CR03-493  | 48.58  | 17.2      | 9.79  | 9.23  | 4.45 | 0.84  | 3.17   | 0.151 | 1.694  | 0.411    | 27.1 | 235.7 | 66.8  | 45   | 82    | 96.9  | 89.2  | 10.5  | 487.3 | 28.8 | 142.1 | 10.8 | 0.8  | 379    | 22.3 | 46.4 | 25.6 | 7    | 1.6  | 3.4 | 3   | 2.9 | -0.1 |
| CR03-494  | 47.18  | 15.87     | 10.82 | 9.12  | 5.82 | 0.66  | 2.88   | 0.166 | 1.876  | 0.271    | 27.2 | 275.4 | 69.8  | 59.4 | 158.1 | 55.7  | 108.7 | 12.2  | 477.8 | 27.5 | 146.5 | 10.4 | 1.1  | 249.2  | 15.5 | 33.4 | 20.5 | 3.7  | -0.4 | 3.5 | 2.9 | 2.6 | 0.1  |
| CR03-495  | 45.12  | 15.87     | 11.16 | 9.39  | 4.57 | 0.31  | 2.57   | 0.163 | 1.963  | 0.293    | 28.6 | 338.4 | 62    | 39.4 | 102   | 130.4 | 86.2  | 372.1 | 136.1 | 39.2 | 136.1 | 8.1  | 0.6  | 435.1  | 12.6 | 33.1 | 21.6 | 4.3  | 1.2  | 5.5 | 4.8 | 2.6 | 0.1  |
| CR03-496  | 45.65  | 15.56     | 12.44 | 10.02 | 4.88 | 0.3   | 2.86   | 0.177 | 2.118  | 0.323    | 35.7 | 370.7 | 202.1 | 58.5 | 131.1 | 181.9 | 113.2 | 6.9   | 417.7 | 33.3 | 152.7 | 8.3  | 1.3  | 265.3  | 13.1 | 35.1 | 22.6 | 4.8  | 0.7  | 2.7 | 7.4 | 6.6 | 3.8  |
| CR03-497  | 45.71  | 15.34     | 12.36 | 10.04 | 4.95 | 0.3   | 2.74   | 0.157 | 2.254  | 0.329    | 34.9 | 348   | 180.1 | 53.5 | 117.8 | 208.5 | 112.8 | 6.3   | 409.5 | 33.8 | 155.3 | 8.4  | 1.2  | 215.4  | 11.4 | 36.1 | 25.3 | 6.5  | 2    | 3.1 | 6.5 | 0.2 | 4.1  |
| CR03-498  | 45.78  | 15.45     | 12.01 | 9.86  | 5.55 | 0.27  | 2.75   | 0.163 | 2.151  | 0.316    | 30   | 290   | 167.9 | 53.4 | 133.5 | 169.3 | 108   | 4.1   | 403.6 | 33.2 | 150.2 | 8.4  | 1    | 192.8  | 11.5 | 36.3 | 21.2 | 3.7  | 3    | 3.1 | 6   | 0.6 | 2.6  |
| CR03-499  | 46.33  | 15.66     | 11.46 | 9.38  | 5.93 | 0.43  | 2.66   | 0.183 | 1.913  | 0.283    | 29.6 | 308.5 | 186.2 | 58.3 | 147.3 | 188   | 102.3 | 5.8   | 395.1 | 29.7 | 133.8 | 7.5  | 1.4  | 279.4  | 8    | 29.9 | 18.8 | 5.9  | 3.6  | 2.3 | 5.8 | 0.8 | 2.4  |
| CR03-500  | 45.02  | 15.52     | 11.17 | 8.73  | 6.66 | 0.85  | 2.15   | 0.226 | 1.853  | 0.275    | 24.6 | 268.5 | 191.1 | 58.9 | 153.6 | 93.2  | 92.4  | 25.8  | 406.8 | 29.4 | 130.9 | 7.1  | 0.9  | 2229.1 | 8.3  | 24.5 | 14.2 | 2.1  | 1    | 2   | 5.3 | 0   | 2.1  |
| CR03-501  | 45.76  | 15.97     | 11.59 | 9.61  | 4.98 | 0.43  | 2.61   | 0.163 | 1.888  | 0.281    | 36.1 | 362.7 | 205.7 | 62.3 | 136.9 | 232.7 | 113.8 | 7.4   | 412.9 | 30.2 | 134.1 | 7.1  | 1    | 336    | 10   | 38.3 | 20.2 | 6.2  | 1.9  | 1.3 | 6.7 | 0.6 | 3.4  |
| CR03-502  | 48.01  | 16.83     | 9.83  | 9.84  | 5.09 | 0.63  | 2.97   | 0.126 | 1.919  | 0.287    | 26.1 | 279.5 | 72.6  | 51.6 | 147.8 | 52.5  | 107.4 | 10.7  | 505   | 27.7 | 153.7 | 11.2 | 1.6  | 309.6  | 14.1 | 40.4 | 24.1 | 5.1  | 2.7  | 2.9 | 6.5 | 2.1 | 3.8  |
| CR03-503  | 46.17  | 16.21     | 12.14 | 10.12 | 4.16 | 0.4   | 2.88   | 0.131 | 2.128  | 0.314    | 33   | 337.4 | 192.6 | 55.9 | 136.9 | 190   | 110.1 | 7.7   | 428.9 | 32.6 | 148.8 | 8.1  | 1.4  | 269    | 15.5 | 39.8 | 24.7 | 7.5  | 3.2  | 3.5 | 5.5 | 1.9 | 2.8  |
| CR03-504  | 48.3   | 16.87     | 10.91 | 9.34  | 4.02 | 0.79  | 3.28   | 0.171 | 2.163  | 0.399    | 34.5 | 342   | 32.3  | 44   | 66.1  | 83.2  | 99.1  | 10.5  | 472.8 | 33.9 | 159.4 | 9.2  | 0.6  | 366.7  | 12.5 | 39.7 | 23.4 | 3.5  | 2.2  | 2.6 | 4   | 1.3 | 2    |
| CR03-505  | 46.58  | 16.08     | 11.04 | 8.76  | 5.76 | 0.75  | 2.91   | 0.262 | 2.143  | 0.45     | 25.7 | 308   | 53.8  | 47.4 | 98.8  | 115.1 | 97    | 10    | 446.7 | 33.6 | 152.3 | 9.2  | 1.7  | 359.3  | 16.3 | 38.9 | 24.9 | 5.7  | 2.7  | 3.7 | 6.4 | 1.5 | 2    |
| CR03-506  | 48.54  | 16.3      | 11    | 9.11  | 3.77 | 0.86  | 3.27   | 0.188 | 2.217  | 0.461    | 27.4 | 315.9 | 37.7  | 43.2 | 55.1  | 140.1 | 96.1  | 13.1  | 455.1 | 37   | 186.3 | 12.2 | 0.8  | 477.4  | 21.6 | 53.1 | 32.1 | 8.1  | 2    | 3.4 | 4.6 | 2.5 | 2.1  |
| CR03-507  | 50.63  | 15.77     | 10.82 | 8.24  | 3.16 | 1.54  | 3.55   | 0.172 | 2.3    | 0.538    | 34.9 | 324.8 | 17.2  | 34.6 | 34.5  | 149.5 | 95.3  | 37.5  | 463.3 | 40   | 204.3 | 12.8 | 0.3  | 525.5  | 24.7 | 53.1 | 32.3 | 6.7  | 3    | 4   | 6.6 | 3   | 3.1  |
| CR03-508  | 50.12  | 17.35     | 9.83  | 9.29  | 3.47 | 0.82  | 3.54   | 0.234 | 1.871  | 0.426    | 27.4 | 288   | 20.2  | 39.6 | 41.1  | 118.4 | 90    | 12.7  | 519.2 | 33.7 | 170.2 | 9.3  | 0.4  | 473.1  | 14.7 | 40.8 | 22.7 | 6.7  | 4.1  | 5.4 | 5.4 | 3.3 | 1.5  |
| CR03-509  | 47.97  | 14.87     | 12.84 | 8.96  | 3.97 | 0.81  | 3.15   | 0.24  | 2.854  | 0.658    | 37.9 | 446   | -16.1 | 43.3 | 45    | 199.3 | 142.4 | 8.5   | 484.4 | 47   | 255.7 | 17.3 | -0.2 | 575.4  | 22.3 | 67.3 | 42.7 | 9.4  | 4.4  | 5.8 | 5.5 | 3.2 | 1.5  |

|             |       |       |       |       |      |      |      |       |       |           |        |       |       |             |       |       |       |      |       |       |       |             |       |      |             |             |          |        |      |            |        |     |
|-------------|-------|-------|-------|-------|------|------|------|-------|-------|-----------|--------|-------|-------|-------------|-------|-------|-------|------|-------|-------|-------|-------------|-------|------|-------------|-------------|----------|--------|------|------------|--------|-----|
| CP-30       | 48.07 | 15.98 | 12.44 | 8.69  | 4.31 | 1.24 | 3.52 | 0.197 | 2.779 | 0.518     | 31.9   | 450.9 | 29.1  | 51.7        | 54.1  | 201.8 | 123.1 | 16.2 | 549.9 | 39.8  | 220.5 | 14.1 0.5<LL | 581.9 | 26   | 41.9        | 28.3        | 11.7 <LL | 10.2   | 13.4 | 13.2       | 2.3    |     |
| CP-30       | 48.28 | 15.22 | 13.11 | 7.94  | 4.31 | 1.39 | 3.58 | 0.207 | 2.966 | 0.525     | 30.9   | 457.8 | 30.9  | 50.8        | 59.3  | 260.7 | 126.4 | 25.4 | 519.3 | 40.1  | 228.5 | 15.1 0.5    | 537.9 | 30.9 | 58          | 30.8        | 7 <LL    | 10.5   | 12.8 | 13.3       | 2      |     |
| CP-31       | 48.01 | 15.34 | 12.95 | 9.98  | 4.28 | 1.33 | 3.54 | 0.207 | 2.884 | 0.502     | 31.5   | 439.1 | 35.1  | 49.5        | 59.1  | 266.8 | 123.7 | 25.7 | 534.4 | 39.5  | 216.4 | 14.3 0.5<LL | 513.3 | 27.9 | 50.2        | 29.3 4.7<LL | <LL      | 10     | 13.2 | 13         | 2.7    |     |
| CP-32       | 46.99 | 16.49 | 11.49 | 10.55 | 7.47 | 0.38 | 2.77 | 0.185 | 1.613 | 0.195     | 32.1   | 325   | 157.9 | 57.1        | 155.7 | 168.8 | 87.6  | 2.4  | 419.2 | 25.9  | 107.8 | 6.2 <LL     | 156.1 | 9.5  | 16.6 5.0<LL | 1.4<LL      | <LL      | 4.7    | 10.3 | 7.7        | 2.5    |     |
| CP-33       | 47.83 | 16.62 | 11.45 | 10.46 | 7.62 | 0.43 | 2.8  | 0.182 | 1.633 | 0.199     | 34.3   | 322.6 | 158.3 | 59.6        | 162.9 | 133.5 | 90.7  | 5.5  | 412   | 25.9  | 112.9 | 5.7 0.1<LL  | 170.3 | 12.9 | 21.3 4.8<LL | 2.1<LL      | <LL      | 5.1    | 9.5  | 6.6        | 1.4    |     |
| CP-34       | 47.92 | 16.59 | 11.52 | 10.44 | 7.65 | 0.46 | 2.81 | 0.183 | 1.633 | 0.199     | 29.1   | 283.5 | 127.5 | 47.4        | 147.7 | 146.1 | 86.4  | 6.1  | 419   | 25.7  | 113.5 | 5.7 <LL     | 148.7 | 10.5 | 26.1        | 6 <LL       | <LL      | 4.5    | 9.7  | 6.6 0.7<LL |        |     |
| CP-35       | 47.04 | 16.35 | 11.41 | 10.21 | 7.48 | 0.44 | 2.79 | 0.182 | 1.633 | 0.195     | 34.3   | 323.7 | 135.2 | 65          | 155.8 | 148.8 | 94.3  | 4.3  | 411   | 26.4  | 115.8 | 6.2 <LL     | 187.2 | 17.3 | 26          | 8.9 1.6<LL  | <LL      | 3.9    | 9.4  | 5.8 0.6<LL |        |     |
| CP-36       | 47.21 | 16.24 | 11.59 | 10.36 | 7.56 | 0.43 | 2.61 | 0.183 | 1.642 | 0.183     | 35.8   | 330.9 | 110.1 | 66.5        | 160.4 | 147.3 | 93.7  | 7.7  | 354.8 | 26.4  | 117.7 | 7.9 <LL     | 186.2 | 14.4 | 36.4        | 14.4 3.7<LL | <LL      | <LL    | 9.1  | 7          | 0.2<LL |     |
| CP-37       | 47.25 | 16.23 | 11.54 | 10.37 | 7.07 | 0.46 | 2.61 | 0.184 | 1.644 | 0.183     | 34.3   | 331.2 | 112.5 | 65          | 154.4 | 195.2 | 93.8  | 8.7  | 363.7 | 26.9  | 122   | 7.6 0.0<LL  | 186.1 | 17.3 | 21.5 1.3<LL | 0.9<LL      | <LL      | 7.2    | 10.2 | 7.4        | 1.1    |     |
| CP-39       | 47.09 | 16.11 | 11.61 | 10.22 | 7.54 | 0.45 | 2.64 | 0.184 | 1.666 | 0.204     | 33.6   | 317.7 | 103.7 | 64.3        | 160.5 | 157.8 | 92.6  | 7.6  | 350.8 | 27    | 120.5 | 7.1 <LL     | 158.7 | 13.6 | 27.3        | 9.1 <LL     | <LL      | 4.2    | 9.6  | 6.2        | 1.2    |     |
| CP-39 (JAI) | 47.24 | 16.13 | 11.63 | 10.34 | 7.72 | 0.45 | 2.64 | 0.184 | 1.681 | 0.191     | 34.6   | 322.9 | 105.3 | 71.7        | 154.5 | 129.7 | 90.9  | 7.3  | 350.2 | 26    | 120.4 | 7.3 <LL     | 151.7 | 15.2 | 32.6        | 14.6 1.0<LL | <LL      | 5.8    | 9.1  | 3.8        | 1.5    |     |
| CP-40       | 47.53 | 15.12 | 12.26 | 9.87  | 7.14 | 0.65 | 2.82 | 0.191 | 2.047 | 0.252     | 32.2   | 311   | 188.2 | 62.8        | 131.8 | 176.4 | 93.5  | 12.2 | 348.3 | 32.9  | 156.5 | 10.2 <LL    | 187.9 | 16.8 | 32.7        | 12.6 4.3<LL | <LL      | 6.7    | 11.4 | 8          | 1.4    |     |
| CP-41       | 47.75 | 15.38 | 11.92 | 9.83  | 7.18 | 0.7  | 2.73 | 0.187 | 1.907 | 0.244     | 35.1   | 346.5 | 216.9 | 65.7        | 147.7 | 147.9 | 99.8  | 14.1 | 341.4 | 31.1  | 149.5 | 9.5 0.2<LL  | 242.1 | 20.5 | 33.7        | 12.7 2.2<LL | <LL      | 5.8    | 9.7  | 5.9        | 1.3    |     |
| CP-42       | 47.53 | 14.14 | 13.47 | 8.36  | 4.86 | 1.42 | 3.35 | 0.212 | 3     | 0.564     | 32     | 457.4 | 36.6  | 66          | 63.6  | 261.4 | 124   | 25.5 | 475.1 | 43.4  | 239.8 | 15.4 0.4<LL | 525.4 | 28.5 | 57.6        | 31.2 0.6<LL | <LL      | 9.2    | 11.4 | 12.8       | 1.6    |     |
| CP-43       | 47.87 | 15.3  | 12.6  | 8.8   | 4.39 | 1.22 | 3.41 | 0.2   | 2.873 | 0.516     | 35.6   | 467.6 | 31.6  | 53.1        | 59.1  | 247   | 131.3 | 16.9 | 517.4 | 40.9  | 216.4 | 13.8 0.5    | 559   | 30.6 | 61.8        | 34.7        | 8.4 <LL  | 3.7    | 10.7 | 9.6        | 2.4    |     |
| CP-44       | 47.83 | 14.48 | 11.7  | 8.23  | 4.17 | 1.42 | 3.48 | 0.208 | 2.918 | 0.559     | 30     | 370.7 | 29.9  | 41          | 48.8  | 285.4 | 117   | 25.7 | 509.1 | 45.2  | 236.8 | 14.7 0.6    | 515.9 | 29.6 | 59.6        | 30.9 4.1<LL | <LL      | 10     | 11.8 | 11.8       | 1.3    |     |
| CP-45       | 49.36 | 17.43 | 10.49 | 8.85  | 3.71 | 1.3  | 3.69 | 0.17  | 2.434 | 0.497     | 24     | 282.3 | 19.6  | 19.4        | 49.1  | 209.8 | 91.2  | 22.1 | 612.6 | 36.2  | 211.2 | 12.9 0.5    | 477.4 | 27.1 | 49.5        | 26.9 2.5<LL | <LL      | 8.7    | 12.6 | 11         | 1.7    |     |
| CP-46       | 48.18 | 16.62 | 11.9  | 8.83  | 3.68 | 1.27 | 3.59 | 0.182 | 2.611 | 0.542     | 26     | 290.5 | 13.4  | 36.2        | 50.6  | 263.9 | 99.8  | 17.9 | 584   | 41    | 232.4 | 14.7 0.4<LL | 536.8 | 31.1 | 50.4        | 28.3 3.5<LL | <LL      | 9.5    | 12.3 | 12.5       | 2      |     |
| CP-47       | 49.47 | 17.3  | 10.74 | 8.8   | 3.82 | 1.36 | 3.68 | 0.175 | 2.499 | 0.5       | 25.5   | 342.4 | 17.2  | 39.4        | 51.2  | 204.7 | 105.5 | 23.9 | 580.2 | 36.7  | 211.5 | 13.1 0.1<LL | 487.8 | 29.3 | 48.5        | 24.5 2.8<LL | <LL      | 8.5    | 11.1 | 11.7       | 1.8    |     |
| CP-48       | 55.74 | 14.86 | 8.39  | 5.83  | 2.59 | 2.94 | 3.27 | 0.137 | 1.89  | 0.443     | 19.1   | 229.5 | 8.5   | 46.2        | 23.9  | 139.3 | 100.1 | 87.5 | 425.1 | 34.8  | 266.6 | 18.4 1.9    | 806.2 | 36.7 | 64.3        | 29.4        | 6 <LL    | 6.8    | 16.9 | 15.6       | 4.8    |     |
| CP-49       | 47.24 | 16.01 | 10.81 | 10.33 | 7.6  | 0.49 | 2.79 | 0.176 | 1.678 | 0.223     | 31.7   | 293.4 | 251.2 | 58.2        | 172.6 | 178.1 | 90.5  | 4.5  | 421.6 | 26.7  | 126.7 | 7.6 0.1<LL  | 254.8 | 18.4 | 30.7        | 9.9 <LL     | <LL      | 2.6<LL | 9.1  | 6.8        | 2.5    |     |
| CP-50       | 48.53 | 17.88 | 10.12 | 10    | 4.55 | 0.87 | 3.18 | 0.159 | 1.843 | 0.314     | 24.3   | 256.8 | 41.4  | 42.7        | 56.6  | 176.2 | 80.1  | 12.7 | 585.4 | 26.6  | 148.1 | 9.1 0.2<LL  | 336.2 | 18.3 | 32.4        | 13.3 0.7<LL | <LL      | 5.6    | 9.7  | 8.4        | 2.9    |     |
| CP-51       | 49.17 | 17.85 | 10.32 | 9.12  | 4.27 | 1.14 | 3.48 | 0.158 | 1.864 | 0.349     | 24.4   | 257.1 | 70.5  | 31.2        | 91.3  | 163   | 83.4  | 23.1 | 502.4 | 30.5  | 169.9 | 8.6 0.4<LL  | 401.2 | 20.6 | 32.3        | 17 4.2<LL   | <LL      | 4.9    | 10.9 | 10.3       | 3.4    |     |
| CP-52       | 49.26 | 16.7  | 10.97 | 8.96  | 4.76 | 1.27 | 3.43 | 0.171 | 1.94  | 0.359     | 27.6   | 287   | 83    | 54.6        | 81.8  | 219.1 | 89.7  | 28.1 | 455.4 | 32.7  | 179.6 | 9.1 0.3<LL  | 446.4 | 24.7 | 41.2        | 18.6 <LL    | <LL      | 5.1    | 11.5 | 10.3       | 3.5    |     |
| CP-53       | 49.62 | 13.41 | 12.07 | 8.1   | 4.3  | 1.78 | 3.1  | 0.189 | 2.501 | 0.465     | 32.9   | 409.2 | 64.5  | 65.8        | 49.2  | 199.5 | 119.4 | 43   | 394   | 39.5  | 241.3 | 15 1.3      | 629.4 | 28.7 | 53.7        | 30 2.6<LL   | <LL      | 6.1    | 12.2 | 11.3       | 2.6    |     |
| CP-54       | 50.19 | 15.47 | 10.73 | 8.64  | 4.04 | 1.58 | 3.26 | 0.167 | 2.15  | 0.404     | 27.4   | 318.2 | 54.1  | 33.6        | 51.8  | 177.5 | 94.2  | 36.4 | 458.8 | 33.9  | 207.9 | 12.4 0.7    | 518.2 | 23.8 | 47.6        | 25.4 0.4<LL | <LL      | 6.7    | 11.6 | 11.4       | 3.3    |     |
| CP-55       | 48.64 | 19.58 | 9.15  | 10.85 | 5.43 | 0.78 | 3.03 | 0.164 | 1.904 | 0.257     | 27.7   | 296   | 69.8  | 60.2        | 113.4 | 140.4 | 87.3  | 14.3 | 460.2 | 26.7  | 152.3 | 9.9 0.2<LL  | 252.7 | 16.8 | 30.2        | 12.2 2.9<LL | <LL      | 3.7    | 9.2  | 7.5        | 2.5    |     |
| CP-56       | 48.69 | 19.58 | 9.11  | 10.71 | 4.96 | 0.58 | 3.1  | 0.139 | 1.552 | 0.212     | 25     | 260.3 | 81.9  | 39.6        | 102.9 | 129.4 | 75.7  | 9.3  | 475   | 22.5  | 121.5 | 6.6 0.0<LL  | 211.9 | 12.6 | 21.5        | 7.9 1.7<LL  | <LL      | 2.8<LL | 9.3  | 7.1        | 2.6    |     |
| CP-57       | 49.12 | 15.43 | 10.42 | 10.61 | 7.1  | 0.69 | 2.51 | 0.172 | 1.55  | 0.192     | 32.6   | 293.3 | 196.1 | 62.6        | 122.2 | 124   | 83.1  | 12.1 | 383.5 | 24.5  | 114.4 | 6 0.2<LL    | 259.3 | 10.9 | 22.4        | 9.6 <LL     | <LL      | 0.7<LL | 8.9  | 6.3        | 3.6    |     |
| CP-58       | 47.93 | 19.88 | 9.45  | 10.52 | 4.08 | 0.6  | 3.22 | 0.141 | 1.707 | 0.258     | 22.9   | 247.2 | 50.5  | 37.7        | 65.5  | 141.9 | 76.9  | 8.7  | 533.7 | 23.4  | 128.7 | 6.8 0.1<LL  | 243.3 | 15.4 | 26.9        | 11.6 0.9<LL | <LL      | 3.4    | 8.9  | 7.4        | 2.6    |     |
| CP-60       | 48.74 | 19    | 9.49  | 9.9   | 3.91 | 0.92 | 3.41 | 0.145 | 1.757 | 0.321     | 22.6   | 227.8 | 61.8  | 38.5        | 66.7  | 151.8 | 74.2  | 17.9 | 553.2 | 26.8  | 149.3 | 8 0.2<LL    | 306.6 | 17.2 | 34.1        | 13.6 0.4<LL | <LL      | 4.2    | 9.6  | 8.1        | 2.5    |     |
| CP-61       | 47.74 | 19.65 | 9.64  | 10.46 | 4.55 | 0.53 | 3.15 | 0.143 | 1.882 | 0.239     | 25.9   | 309.2 | 116.6 | 52.1        | 109.5 | 153.9 | 84.5  | 7.2  | 498.6 | 23.8  | 134.5 | 9.8 0.4<LL  | 221.4 | 19.6 | 29.2        | 11.5 4.8<LL | <LL      | 2.1<LL | 8.2  | 7.7        | 1.1    |     |
| CP-62       | 49.88 | 16.01 | 9.37  | 10.06 | 7.64 | 0.84 | 2.71 | 0.156 | 1.315 | 0.229     | 28.5   | 250.8 | 264.1 | 57.7        | 131.8 | 104.2 | 76.2  | 13.1 | 512.7 | 20.8  | 107.5 | 6.4 0.2<LL  | 321.8 | 13.7 | 34.3        | 10.1 4.3<LL | <LL      | 1.3<LL | 8.8  | 6.1        | 1.6    |     |
| CP-63       | 49.72 | 15.68 | 9.7   | 10.07 | 6.87 | 0.94 | 2.75 | 0.164 | 1.486 | 0.247     | 27.9   | 263.3 | 188.7 | 44.7        | 112.8 | 112.2 | 80.5  | 15.8 | 509.2 | 23    | 122.6 | 8 0.3<LL    | 344.5 | 12.1 | 35.9        | 10.7        | 5.1 <LL  | 1.8<LL | 9    | 6.9        | 1.2    |     |
| CP-64       | 49.5  | 15.13 | 10.23 | 10.1  | 5.89 | 0.94 | 2.77 | 0.173 | 1.7   | 0.291     | 30.5   | 308.6 | 182.2 | 54.9        | 77.6  | 147.2 | 89.9  | 16   | 508.9 | 27.2  | 140   | 8.9 <LL     | 430.3 | 19.3 | 40.8        | 17          | 5.4 <LL  | 1.0<LL | 9.1  | 8.8        | 1.4    |     |
| CP-65       | 49.24 | 15.35 | 9.92  | 10.08 | 6.9  | 0.92 | 2.69 | 0.163 | 1.489 | 0.244     | 32.6   | 302.2 | 220.7 | 60.9        | 119.8 | 119.9 | 92.2  | 16.1 | 500.1 | 22.5  | 124   | 7.7 0.2<LL  | 360.9 | 18.4 | 27          | 10.2        | 9.8 <LL  | 0.7<LL | 9.5  | 6.1        | 2.3    |     |
| CP-66       | 70.39 | 12.29 | 4.24  | 0.46  | 0.09 | 5    | 4.06 | 0.131 | 0.422 | 0.084     | 6 <LL  |       | 4.9   | 25.3 2.0<LL | 9.8   | 141.9 | 160.8 | 35.2 | 108.5 | 350.3 | 19.6  | 3.2         | 797   | 66.6 | 105.3       | 79.2        | 23.7     | 7.9    | 5.6  | 20.9       | 19.5   | 8.4 |
| CP-67       | 73.55 | 10.61 | 3.58  | 0.38  | 0.08 | 4.57 | 4.24 | 0.092 | 0.305 | 0.027 <LL | 5.2<LL |       | 4.8   | 11.1 <LL    | 5.3   | 150.7 | 126.7 | 17   | 39.2  | 466.4 | 23.6  | 1.3         |       |      |             |             |          |        |      |            |        |     |

COTTONWOOD CREEK SECTION:

| SAMPLE   | SiO[2] | Al[2]O[3] | FeO   | CaO   | MgO   | K[2]O | Na[2]O | MnO   | TiO[2] | P[2]O[5] | Sc   | V     | Cr    | Co    | Ni    | Cu    | Zn    | Rb    | Sr    | Y     | Zr    | Nb    | Mo   | Ba     | La   | Ce    | Nd   | Sm    | Yb   | Hf    | Pb   | Th    | U    |       |
|----------|--------|-----------|-------|-------|-------|-------|--------|-------|--------|----------|------|-------|-------|-------|-------|-------|-------|-------|-------|-------|-------|-------|------|--------|------|-------|------|-------|------|-------|------|-------|------|-------|
| CR03-443 | 55.61  | 13.52     | 10.9  | 6.53  | 2.95  | 1.91  | 3.35   | 0.188 | 2.129  | 0.712    | 26.5 | 303.3 | 18.2  | 55    | 24.9  | 44.1  | 150.9 | 39.4  | 514   | 41.3  | 266.3 | 15.5  | 1.6  | 1039.4 | 35.5 | 88.7  | 44.3 | 8     | 1.9  | 5.5   | 8.5  | 4.5   | 3    |       |
| CR03-444 | 48.27  | 15.16     | 11.33 | 10.68 | 7.74  | 0.49  | 2.66   | 0.173 | 1.931  | 0.285    | 27.8 | 259.3 | 186.1 | 61.7  | 116   | 36    | 101.9 | 6.5   | 451.6 | 25.4  | 135.2 | 10.6  | 1.3  | 180.5  | 13.3 | 39.4  | 21.3 | 3.9   | 0.3  | 3.7   | 3.5  | 2.2   | 1.4  |       |
| CR03-445 | 47.07  | 15.95     | 11.08 | 9.43  | 7.8   | 0.52  | 2.74   | 0.162 | 1.918  | 0.28     | 22.6 | 248   | 116.1 | 55.5  | 123.8 | 44.8  | 103.1 | 5.2   | 488.8 | 25.3  | 128.8 | 10.5  | 1.1  | 158.4  | 12.4 | 38    | 20.2 | 4     | -0.8 | 2.1   | 2.4  | 2.2   | 2.6  |       |
| CR03-446 | 47.52  | 15.87     | 11.4  | 10.5  | 5.69  | 0.47  | 2.88   | 0.179 | 1.886  | 0.275    | 24.8 | 245.9 | 107.3 | 54.3  | 115.4 | 43.9  | 106.1 | 4.4   | 590.1 | 25.1  | 131.4 | 10.9  | 0.9  | 179.4  | 5    | 34.9  | 21.4 | 5.4   | 0.8  | 3.1   | 4    | 2     | 2.1  |       |
| CR03-447 | 46.12  | 14.89     | 11.84 | 8.24  | 3.36  | 1.36  | 3.37   | 0.184 | 2.564  | 0.612    | 20.6 | 269.2 | 77.3  | 49.4  | 93.3  | 78    | 124   | 28.8  | 550.5 | 37.7  | 248.3 | 18.3  | 0.6  | 172.4  | 23.6 | 77.3  | 42.5 | 8.9   | 1.2  | 4.8   | 3.6  | 2.5   | 2.5  |       |
| CR03-448 | 45.18  | 10.81     | 10.57 | 5.94  | 10.57 | 5.94  | 10.57  | 5.94  | 6.93   | 14.27    | 6.93 | 14.27 | 6.93  | 14.27 | 6.93  | 14.27 | 6.93  | 14.27 | 6.93  | 14.27 | 6.93  | 14.27 | 6.93 | 14.27  | 6.93 | 14.27 | 6.93 | 14.27 | 6.93 | 14.27 | 6.93 | 14.27 | 6.93 | 14.27 |
| CR03-449 | 46.78  | 16.44     | 11.12 | 9.76  | 3.6   | 0.83  | 3.19   | 0.175 | 2.142  | 0.361    | 20.8 | 258.9 | 86.7  | 57.3  | 90.1  | 57.7  | 112.9 | 15.3  | 553.3 | 30.2  | 183.6 | 12.4  | 1    | 394.2  | 15.1 | 51.6  | 31.2 | 5.2   | 2.7  | 4.1   | 4.3  | 1.9   | 0.9  |       |
| CR03-450 | 47.23  | 16.54     | 11.99 | 9.68  | 2.24  | 0.82  | 3.21   | 0.223 | 2.179  | 0.371    | 23.1 | 277   | 59    | 57.2  | 69.5  | 63.1  | 122.9 | 15.9  | 557.9 | 30.9  | 186.8 | 12.7  | 0.9  | 418.6  | 15.1 | 53.1  | 29.4 | 7.8   | 2.7  | 4.3   | 3.7  | 1.9   | 0.9  |       |
| CR03-451 | 48.38  | 15.05     | 12    | 9.02  | 5.52  | 0.95  | 3.03   | 0.176 | 2.274  | 0.391    | 25   | 251.9 | 108.3 | 49.2  | 100.4 | 73.5  | 118.6 | 19.1  | 466.9 | 32.1  | 189.1 | 12.3  | 1.1  | 350    | 27.5 | 50.2  | 27.4 | 4.7   | 2.3  | 3.8   | 4.4  | 2.3   | 0    |       |
| CR03-452 | 46.54  | 15.61     | 11.27 | 9.24  | 7.26  | 1.11  | 2.5    | 0.171 | 1.984  | 0.309    | 25.3 | 265.8 | 129.7 | 56.2  | 139.6 | 59.6  | 106.5 | 66.6  | 608.8 | 28.3  | 144.7 | 10    | 0.2  | 2653.7 | 13   | 25    | 15.1 | 3.6   | 2.1  | 3.4   | 1.9  | 2.2   | 0.3  |       |
| CR03-453 | 46.97  | 15.18     | 11.82 | 9.16  | 6.88  | 0.63  | 2.82   | 0.172 | 2.121  | 0.301    | 26.3 | 259.4 | 116.2 | 56.2  | 171.5 | 83.6  | 114.3 | 13.5  | 444.9 | 29.4  | 158.9 | 9.9   | 1.9  | 222.7  | 14.6 | 47.4  | 24.7 | 5.9   | 2.8  | 3.2   | 6.2  | 1.5   | 1.1  |       |
| CR03-454 | 48.65  | 15.93     | 11.9  | 8.69  | 5.37  | 0.97  | 3.22   | 0.16  | 2.386  | 0.399    | 23.5 | 251   | 64.5  | 46.6  | 93.1  | 90.2  | 117.5 | 19.7  | 469.3 | 33.4  | 201.2 | 14.5  | 1    | 341.7  | 22.7 | 54.1  | 32   | 6.4   | 1    | 4.4   | 4.5  | 2.1   | 0.1  |       |
| CR03-455 | 50.99  | 15.03     | 10.63 | 8.38  | 4.81  | 1.27  | 2.89   | 0.159 | 2.074  | 0.353    | 23.1 | 239.9 | 55.9  | 43.4  | 46.5  | 38.6  | 120.7 | 31.5  | 467.2 | 34.1  | 222.3 | 14.9  | 1.4  | 555.8  | 24.9 | 61.5  | 32.6 | 6.9   | 3.1  | 4.9   | 7.3  | 3.1   | 1.2  |       |
| CR03-456 | 49.43  | 15.96     | 10.63 | 9.48  | 5.16  | 0.96  | 2.87   | 0.171 | 1.949  | 0.317    | 28.5 | 291.9 | 94.9  | 58    | 67.7  | 47.4  | 117.5 | 18.9  | 470.3 | 29.2  | 163.1 | 11    | 1.7  | 368    | 13.2 | 40.1  | 22.9 | 5.7   | 1.4  | 4.4   | 4.1  | 2.6   | 0    |       |

|         |       |       |       |       |      |      |      |       |       |       |      |              |       |      |       |       |       |       |       |       |          |             |       |            |          |              |        |      |            |             |     |
|---------|-------|-------|-------|-------|------|------|------|-------|-------|-------|------|--------------|-------|------|-------|-------|-------|-------|-------|-------|----------|-------------|-------|------------|----------|--------------|--------|------|------------|-------------|-----|
|         | 48.95 | 16.65 | 11.62 | 8.76  | 4    | 1.34 | 3.44 | 0.195 | 2.631 | 0.512 | 26.2 | 402.1        | 23.4  | 45.8 | 51.7  | 235.7 | 112.8 | 22.8  | 561.7 | 36.3  | 213.2    | 13 <LL      | 502.7 | 27         | 45.3     | 32.5 <LL     | <LL    | 5.9  | 11         | 9.6         | 1.7 |
| PJ-16x2 | 48.47 | 16.25 | 12.03 | 8.58  | 4.29 | 1.28 | 3.47 | 0.206 | 2.665 | 0.502 | 26.8 | 394.3        | 27.6  | 52.1 | 58.2  | 242.1 | 110.3 | 21    | 560   | 36.2  | 214.5    | 13.6 0.4<LL | 478.5 | 23.2       | 40.2     | 30.6 <LL     | <LL    | 6.5  | 11.4       | 9.8         | 1.2 |
| PJ-17   | 49.31 | 17.36 | 11.3  | 8.96  | 4    | 1.26 | 3.61 | 0.179 | 2.524 | 0.477 | 26   | 379.3        | 25.4  | 42.5 | 54    | 240.2 | 105   | 21.4  | 589.9 | 34.9  | 204.4    | 12.5 0.2<LL | 468.9 | 25.2       | 51       | 30.7 <LL     | <LL    | 6.7  | 10.9       | 9.1         | 2.2 |
| PJ-18   | 49.55 | 17.56 | 11.28 | 8.98  | 4.08 | 1.26 | 3.6  | 0.174 | 2.48  | 0.466 | 25.5 | 372.2        | 25.1  | 40.3 | 53.4  | 230.2 | 104.6 | 20.7  | 595.9 | 33.6  | 198.7    | 11.6 0.3<LL | 459.2 | 21.9       | 48.3     | 27.8 <LL     | <LL    | 5.6  | 10.6       | 8.5         | 1   |
| PJ-19   | 48.83 | 16.69 | 11.88 | 8.83  | 4.41 | 1.24 | 3.5  | 0.181 | 2.595 | 0.47  | 26   | 376.9        | 33.9  | 39.4 | 57.6  | 245.1 | 104.9 | 20.7  | 555.4 | 35.7  | 204.8    | 12.4 <LL    | 449.4 | 23.9       | 49       | 29.9 <LL     | <LL    | 6.4  | 11.7       | 9.6         | 1.1 |
| PJ-20   | 48.36 | 15.03 | 13.16 | 8.37  | 4.42 | 1.44 | 3.32 | 0.214 | 2.907 | 0.546 | 31.7 | 456.5        | 41.3  | 54.6 | 65.7  | 299.1 | 127.1 | 26.3  | 487.5 | 40.4  | 233.3    | 14.4 0.5    | 527.6 | 28.3       | 58.5     | 35.3 <LL     | <LL    | 6.5  | 10.6       | 9.2         | 1.8 |
| PJ-21   | 48.17 | 14.73 | 13.16 | 8.33  | 4.47 | 1.38 | 3.44 | 0.216 | 2.928 | 0.549 | 31   | 447.8        | 36.1  | 50.3 | 64.3  | 297.3 | 119.7 | 22.1  | 474.3 | 41.4  | 226      | 14.5 0.2<LL | 519.1 | 27.2       | 54.2     | 33.9 1.3<LL  | <LL    | 7.4  | 11.6       | 9.9         | 1.3 |
| PJ-21x2 | 48.03 | 15.1  | 12.98 | 8.27  | 4.6  | 1.36 | 3.43 | 0.207 | 2.829 | 0.522 | 29.8 | 425.3        | 38    | 45.7 | 65.9  | 253.2 | 113.4 | 23.4  | 492.6 | 39.8  | 205.8    | 14.5 0.1<LL | 485.8 | 21.4       | 44.6     | 31.2 <LL     | <LL    | 6.7  | 12.1       | 10.1 0.7<LL |     |
| PJ-22   | 48.88 | 16.27 | 12.01 | 8.83  | 4.48 | 1.24 | 3.42 | 0.185 | 2.621 | 0.492 | 27.3 | 405.1        | 38.1  | 47.7 | 62.6  | 237.2 | 111.1 | 19.5  | 527.8 | 36.9  | 208.3    | 12.9 0.1<LL | 484.8 | 28.5       | 53.2     | 31.2 <LL     | <LL    | 6.3  | 11         | 8.8 0.8<LL  |     |
| PJ-23   | 47.64 | 14.69 | 12.96 | 8.47  | 4.76 | 1.36 | 3.17 | 0.199 | 2.832 | 0.527 | 32.4 | 453.2        | 40.6  | 59.6 | 63.9  | 227.5 | 124   | 25.1  | 481.1 | 40.2  | 230.4    | 14.2 0.5    | 499.7 | 27.2       | 54       | 34.2 <LL     | <LL    | 7    | 11.8       | 9.4         | 2.4 |
| PJ-24   | 47.42 | 14.34 | 13.66 | 8.45  | 4.74 | 1.32 | 3.21 | 0.202 | 2.619 | 0.482 | 29.2 | 404          | 38.5  | 49.3 | 62.4  | 169.8 | 110.4 | 19.1  | 520.1 | 35.7  | 209.1    | 14.2 <LL    | 471.7 | 22.4       | 43.4     | 33.1 <LL     | <LL    | 7.1  | 11.1       | 8.7         | 1.5 |
| PJ-25   | 47.82 | 14.34 | 13.66 | 8.4   | 4.74 | 1.32 | 3.26 | 0.214 | 2.995 | 0.565 | 34.9 | 485.3        | 43.2  | 62.7 | 65    | 291.3 | 132.3 | 21.9  | 450.8 | 43    | 245.8    | 14.9 <LL    | 537.8 | 30.1       | 59.3     | 37.5 <LL     | <LL    | 8    | 12.1       | 9.9         | 1.8 |
| PJ-26   | 48.73 | 16.45 | 11.84 | 8.94  | 4.1  | 1.36 | 3.21 | 0.183 | 2.547 | 0.489 | 30   | 377.2        | 42.2  | 50.2 | 60.2  | 203.3 | 113.3 | 22.7  | 523.5 | 35.4  | 205.3    | 12.6 0.0<LL | 457.6 | 28.4       | 53.5     | 32.1 <LL     | <LL    | 6.9  | 10.6       | 11.7        | 2.2 |
| PJ-27   | 51.02 | 14.46 | 11.91 | 7.47  | 3.71 | 1.95 | 3.93 | 0.243 | 2.506 | 0.747 | 37.6 | 321.4 <LL    | 43.3  | 11.7 | 32.2  | 117   | 36    | 482.5 | 40    | 225.5 | 13.2 0.7 | 887.1       | 35    | 63.1       | 35.2 <LL | <LL          | 4.3    | 10.1 | 11.6       | 1.6         |     |
| PJ-28   | 50.96 | 14.54 | 11.98 | 7.63  | 3.92 | 1.95 | 4.04 | 0.229 | 2.511 | 0.749 | 37.6 | 304.9 <LL    | 35.4  | 8.6  | 23.5  | 108.5 | 34.2  | 485.6 | 41.5  | 223.5 | 14 0.6   | 798.4       | 33.3  | 57.8       | 36.1 <LL | <LL          | 3.8    | 11.5 | 12.7       | 1.5         |     |
| PJ-29   | 46.68 | 17.14 | 11.35 | 9.49  | 4.69 | 0.97 | 3.4  | 0.189 | 2.184 | 0.37  | 23.9 | 327.8        | 49.9  | 49.1 | 108.1 | 226.4 | 99.6  | 14.9  | 592.2 | 28.3  | 151.9    | 9.8 0.5     | 386.6 | 22.5       | 35.5     | 21.9 <LL     | <LL    | 4.8  | 10.2       | 9.1 0.3<LL  |     |
| PJ-30   | 47.76 | 17.35 | 11.53 | 9.73  | 4.65 | 0.68 | 3.07 | 0.284 | 1.709 | 0.254 | 30.2 | 313.2        | 73.3  | 65.7 | 182.3 | 159.4 | 99.5  | 11    | 483.7 | 26    | 126.6    | 6.6 0.5<LL  | 373.5 | 17.4       | 26.1     | 14.3 <LL     | <LL    | 3    | 9.4        | 7.4         | 1.4 |
| PJ-31   | 46.85 | 16.47 | 11.13 | 9.77  | 5.96 | 0.67 | 2.96 | 0.194 | 1.677 | 0.245 | 30.2 | 295          | 72    | 59.5 | 160.7 | 154   | 97.9  | 11    | 462.4 | 25.8  | 127.1    | 6.7 0.1<LL  | 313.3 | 19.6       | 22.8     | 14.6 <LL     | <LL    | 4.6  | 9.2        | 8.2 0.9<LL  |     |
| PJ-32   | 47.55 | 17.16 | 11.3  | 9.57  | 5.12 | 0.67 | 3.06 | 0.298 | 1.657 | 0.24  | 28.8 | 297          | 68.2  | 66.9 | 171.3 | 176.1 | 100.7 | 9.8   | 480.3 | 25.7  | 130.7    | 6.8 1       | 377.2 | 18.8       | 36.3     | 14.4 7.3 <LL | 1.6<LL | 8.8  | 6.8 0.9<LL |             |     |
| PJ-33   | 47.88 | 17.41 | 11.2  | 9.71  | 6    | 0.57 | 3.03 | 0.178 | 1.639 | 0.239 | 28.2 | 308.5        | 70.2  | 63.8 | 160.5 | 158   | 95.4  | 5.7   | 483   | 24.1  | 120      | 6.2 0.0<LL  | 277.4 | 16.8       | 29.2     | 15.6 <LL     | <LL    | 6.8  | 9.8        | 5.9         | 2.1 |
| PJ-34   | 48.72 | 15.29 | 12.93 | 7.68  | 3.93 | 1.55 | 3.59 | 0.225 | 2.756 | 0.527 | 26.3 | 402.7        | 5.5   | 48.1 | 58.5  | 213.1 | 120.5 | 33.9  | 512.5 | 37.5  | 230.6    | 13.5 0.2<LL | 616.7 | 35.1       | 61.5     | 37.3 <LL     | <LL    | 9.7  | 13         | 10.3        | 2.9 |
| PJ-35   | 48.57 | 15.1  | 13.09 | 7.61  | 4.15 | 1.54 | 3.56 | 0.197 | 2.798 | 0.536 | 28   | 420.7 2.0<LL | 46.4  | 54.7 | 280.4 | 119.1 | 29.7  | 506.9 | 38.6  | 230.2 | 14 0.7   | 623.1       | 30.5  | 51.9       | 34.3 <LL | <LL          | 8.2    | 12.8 | 10.4       | 1.6         |     |
| PJ-36   | 48.2  | 16.18 | 12.18 | 8.74  | 5.29 | 0.89 | 3.4  | 0.2   | 2.133 | 0.331 | 27.6 | 329.9        | 69.4  | 54.4 | 119.8 | 164.4 | 110.3 | 12.7  | 555.6 | 29.9  | 155.1    | 9 0.0<LL    | 426.7 | 18.7       | 28.7     | 20.8 <LL     | <LL    | 3    | 11.1       | 8.5 0.6<LL  |     |
| PJ-37   | 52.36 | 13.69 | 12.08 | 7.1   | 3.73 | 1.85 | 3.32 | 0.198 | 2.534 | 0.538 | 32.3 | 349.8        | 18.1  | 43.4 | 29.2  | 191.9 | 126.4 | 45.6  | 444.4 | 39.2  | 203.5    | 11.8 1      | 694.9 | 27         | 43.1     | 30.7 <LL     | <LL    | 6    | 13.7       | 11          | 2.1 |
| PJ-38   | 52.53 | 13.8  | 12.16 | 7.16  | 3.62 | 1.7  | 3.44 | 0.204 | 2.56  | 0.539 | 32.9 | 338.6        | 22.2  | 43.7 | 30.1  | 169.6 | 123.5 | 40.3  | 451.3 | 38.5  | 203.7    | 11.6 0.7    | 700.1 | 24.6       | 51.2     | 32.5 <LL     | <LL    | 5.4  | 14.6       | 10.6        | 2.3 |
| PJ-39   | 52.08 | 13.85 | 12.08 | 7.36  | 3.78 | 1.8  | 3.31 | 0.194 | 2.478 | 0.506 | 31   | 343.1        | 21.8  | 48.2 | 31.4  | 139.8 | 120.1 | 40.8  | 449.7 | 37    | 197.6    | 11.1 0.5    | 671.6 | 23.6       | 43.1     | 30.1 <LL     | <LL    | 5.9  | 14.3       | 9.5         | 1.4 |
| PJ-40   | 47.47 | 17.34 | 7.95  | 13.26 | 9.52 | 0.25 | 2    | 0.159 | 0.644 | 0.129 | 41.6 | 237.5        | 284.9 | 49.5 | 167.1 | 106   | 49.1  | 2.3   | 183   | 17.3  | 43.7     | 4.2 0.3<LL  | 128.1 | 5.5 4.3<LL | <LL      | <LL          | <LL    | <LL  | 9.8 1.4<LL |             | 1   |

REYNOLDS SECTION:

| SAMPLE | SiO[2] | Al[2]O[3] | FeO   | CaO   | MgO  | K[2]O | Na[2]O | MnO   | TiO[2] | P[2]O[5] | Sc   | V     | Cr    | Co   | Ni    | Cu    | Zn    | Rb    | Sr    | Y    | Zr    | Nb   | Mo  | Ba     | La   | Ce    | Nd   | Sm  | Yb   | Hf  | Pb  | Th   | U    |
|--------|--------|-----------|-------|-------|------|-------|--------|-------|--------|----------|------|-------|-------|------|-------|-------|-------|-------|-------|------|-------|------|-----|--------|------|-------|------|-----|------|-----|-----|------|------|
| CR423  | 47.47  | 15.18     | 11.13 | 9.78  | 9.3  | 0.35  | 2.5    | 0.159 | 1.86   | 0.224    | 25.1 | 257.3 | 194   | 57.7 | 206.9 | 67.9  | 106.2 | 4     | 404   | 23.9 | 116.9 | 9    | 1.3 | 112.5  | 10.1 | 24    | 18.7 | 2.9 | -1.5 | 2.2 | 2.9 | 0.7  | 0.7  |
| CR424  | 47.25  | 16.2      | 11.63 | 10.38 | 4.34 | 0.39  | 2.68   | 0.107 | 1.931  | 0.219    | 32.8 | 306.8 | 217.4 | 57.1 | 213.3 | 74    | 105.2 | 3.8   | 474.4 | 28.1 | 126.9 | 8.9  | 0.3 | 176.4  | 12.9 | 32.9  | 20.9 | 3.5 | 2.2  | 2.6 | 1.5 | 1.2  | 0.3  |
| CR425  | 49.17  | 14.06     | 10.68 | 9.55  | 8.18 | 0.39  | 2.44   | 0.158 | 1.738  | 0.233    | 27.6 | 276.1 | 445.2 | 60.4 | 218.5 | 101.7 | 108.2 | 6.2   | 412.2 | 23.2 | 140.1 | 10.4 | 1.2 | 292.6  | 16.8 | 35    | 21.1 | 4.1 | 1.5  | 3   | 3.7 | 4.2  | 0.3  |
| CR426  | 49.97  | 14.16     | 10.64 | 9.49  | 8.84 | 0.55  | 2.45   | 0.153 | 1.734  | 0.24     | 26.1 | 250.3 | 450.9 | 55.3 | 219.7 | 64.5  | 102.4 | 9.3   | 402.3 | 22.9 | 135.4 | 10.1 | 1   | 253.5  | 14.2 | 33.2  | 18.9 | 3.7 | -0.3 | 2.8 | 3.5 | 3.3  | 0.3  |
| CR427  | 47.83  | 16.18     | 11.09 | 10.62 | 7.38 | 0.35  | 2.86   | 0.156 | 1.938  | 0.293    | 30.1 | 297.9 | 117.8 | 56.4 | 167.6 | 69.2  | 108.4 | 3.9   | 519.7 | 25.2 | 132.8 | 11.8 | 0.6 | 202.8  | 11.4 | 36.4  | 22.4 | 5.4 | -3.8 | 2.6 | 1.2 | 4.6  | 0    |
| CR428  | 48.95  | 14.06     | 10.37 | 9.24  | 9.45 | 0.29  | 2.19   | 0.132 | 1.605  | 0.217    | 26.3 | 245.2 | 488.7 | 57.4 | 259.6 | 99    | 101.3 | 1.4   | 382.7 | 21   | 124   | 9.4  | 0.4 | 221.2  | 5.4  | 34    | 16.3 | 4.6 | 0.5  | 3.5 | 2.9 | 2.7  | -0.1 |
| CR429  | 48.76  | 15.86     | 10.52 | 9.15  | 7.11 | 0.78  | 2.82   | 0.149 | 1.856  | 0.304    | 22.4 | 257.8 | 67.1  | 53.3 | 87    | 40.5  | 104.4 | 14.1  | 476.3 | 25.5 | 151.4 | 12.2 | 0.9 | 296.1  | 12.5 | 43.1  | 25.8 | 4.8 | -1.4 | 3.7 | 3.8 | 5.2  | 1    |
| CR430  | 47.51  | 15.45     | 11.3  | 10.26 | 8.77 | 0.41  | 2.65   | 0.172 | 1.777  | 0.245    | 27.5 | 281.2 | 212.5 | 56.6 | 226.1 | 102.4 | 97.4  | 3.2   | 436.5 | 23.3 | 114.6 | 9.4  | 0.7 | 142.6  | 11.7 | 35.8  | 18.2 | 4   | -0.1 | 3.6 | 1.7 | 0.3  | 0    |
| CR431  | 49.69  | 14.03     | 10.7  | 9.79  | 8.91 | 0.17  | 2.26   | 0.187 | 1.691  | 0.226    | 24.4 | 240.3 | 441   | 53.3 | 256.1 | 109.3 | 98.3  | 0.3   | 408.7 | 22   | 130.1 | 9.4  | 1   | 174.4  | 11.8 | 33.7  | 18.8 | 3.7 | -2.7 | 3   | 2.5 | 0.4  | -1.3 |
| CR432  | 50.19  | 13.99     | 10.81 | 9.31  | 9.54 | 0.54  | 2.45   | 0.164 | 1.744  | 0.236    | 25.4 | 255.7 | 500.3 | 53.3 | 236.7 | 98.4  | 103.6 | 9.7   | 389.6 | 22.8 | 135.9 | 9.9  | 1.1 | 261.4  | 12.3 | 40    | 20.2 | 4.4 | -2.4 | 3.6 | 3.4 | 0.2  | 0.2  |
| CR433  | 50.05  | 14.23     | 10.53 | 9.33  | 9.24 | 0.52  | 2.43   | 0.154 | 1.736  | 0.231    | 25.9 | 247.2 | 436.7 | 53.5 | 226.3 | 87.5  | 101.4 | 8.8   | 392   | 22.1 | 131.3 | 10.1 | 0.8 | 242.3  | 15.4 | 42.2  | 22.7 | 4.3 | 4    | 2.6 | 3.3 | 3.1  | 0.2  |
| CR434  | 48.5   | 15.57     | 10.95 | 9.25  | 6.75 | 0.78  | 2.79   | 0.161 | 1.87   | 0.301    | 22.3 | 246.9 | 63    | 49.6 | 84.1  | 38.2  | 103   | 13    | 478.3 | 25.8 | 152.8 | 11.8 | 1   | 292    | 17.6 | 51.9  | 24.3 | 3.4 | -0.9 | 4.2 | 2.8 | 1    | 0    |
| CR435  | 48.71  | 15.28     | 10.48 | 10.29 | 8.66 | 0.48  | 2.52   | 0.146 | 1.763  | 0.258    | 26.1 | 257   | 224   | 52.3 | 138.2 | 46    | 97.4  | 8.1   | 428.1 | 22.8 | 122.9 | 11   | 1.7 | 169.7  | 13.7 | 35.1  | 19   | 4.7 | 0.3  | 3.3 | 4.4 | -0.4 | 0.1  |
| CR436  | 48.77  | 15.85     | 10.77 | 9.82  | 7.82 | 0.58  | 2.75   | 0.146 | 1.857  | 0.3      | 24.2 | 251.7 | 160   | 49.8 | 123.4 | 56.8  | 97.5  | 3.8   | 471.4 | 24.5 | 135.8 | 12   | 0.1 | 214.6  | 15.9 | 37.7  | 20.8 | 4.5 | -2.3 | 4.2 | 0.7 | 2.1  | 1    |
| CR437  | 47.9   | 15.76     | 11.32 | 10.12 | 8.98 | 0.41  | 2.72   | 0.174 | 1.783  | 0.25     | 26.2 | 264.5 | 176.5 | 52.9 | 206.5 | 95.3  | 99.2  | 3.7   | 455.1 | 23.4 | 113.4 | 9.3  | 1.6 | 127.4  | 2.2  | 25.8  | 15.6 | 4.6 | -3.2 | 3.5 | 2.4 | 0.8  | 0.8  |
| CR438  | 66.8   | 13.55     | 5.94  | 3.32  | 0.86 | 3.36  | 3      | 0.07  | 0.945  | 0.223    | 16.5 | 53.3  | -7.8  | 27   | 3     | 12.9  | 131.3 | 127.9 | 299.4 | 45.4 | 322.1 | 21.4 | 1.1 | 1842.6 | 49.9 | 101.9 | 48.8 | 8.3 | 4.2  | 8.7 | 23  | 9.8  | 3.6  |



| SAMPLE  | SiO2[2] | Al2O3[3] | FeO   | CaO   | MgO  | K2O[2] | Na2O[2] | MnO   | TiO2[2] | P2O5[5] | Sc | V  | Cr  | Co  | Ni | Cu  | Zn  | Rb  | Sr  | Y   | Zr | Nb  | Mo   | Ba | La  | Ce | Nd | Sm | Yb | Hf | Pb | Th | U |
|---------|---------|----------|-------|-------|------|--------|---------|-------|---------|---------|----|----|-----|-----|----|-----|-----|-----|-----|-----|----|-----|------|----|-----|----|----|----|----|----|----|----|---|
| CR7-104 | 48.91   | 16.12    | 11.42 | 10    | 7.06 | 0.51   | 3.09    | 0.183 | 1.797   | 0.289   |    | 34 | 291 | 201 |    | 136 | 98  | 96  | 7   | 391 | 27 | 125 | 9.4  |    | 286 | 16 | 44 |    |    |    | 0  | 4  |   |
| CR7-106 | 50.27   | 18.58    | 9.75  | 10.33 | 5.18 | 0.63   | 3.26    | 0.156 | 1.392   | 0.234   |    | 30 | 243 | 159 |    | 98  | 146 | 78  | 10  | 449 | 22 | 111 | 6.7  |    | 280 | 0  | 37 |    |    |    | 3  | 1  |   |
| CR7-107 | 50.69   | 17.52    | 10.45 | 9.24  | 4.57 | 1.04   | 3.43    | 0.167 | 1.731   | 0.369   |    | 31 | 283 | 61  |    | 52  | 94  | 88  | 19  | 461 | 29 | 147 | 13.4 |    | 438 | 11 | 45 |    |    |    | 2  | 7  |   |
| CR7-108 | 49.94   | 16.22    | 11.42 | 10.48 | 5.7  | 0.47   | 3.04    | 0.178 | 2.167   | 0.266   |    | 29 | 321 | 191 |    | 60  | 124 | 101 | 7   | 383 | 34 | 143 | 11   |    | 304 | 15 | 22 |    |    |    | 2  | 2  |   |
| CR7-109 | 50.06   | 13.85    | 12.95 | 8.86  | 5.24 | 1.11   | 3.12    | 0.216 | 2.715   | 0.83    |    | 33 | 392 | 57  |    | 31  | 67  | 111 | 20  | 390 | 38 | 145 | 9    |    | 608 | 29 | 22 |    |    |    | 4  |    |   |
| CR7-110 | 51.92   | 14.63    | 11.23 | 8.92  | 5.38 | 1.12   | 3.42    | 0.171 | 2.026   | 0.354   |    | 34 | 327 | 142 |    | 35  | 135 | 104 | 24  | 383 | 31 | 153 | 8.9  |    | 526 | 24 | 44 |    |    |    | 4  | 2  |   |
| CR7-111 | 49.78   | 16.51    | 9.93  | 9.96  | 9.75 | 0.25   | 2.37    | 0.984 | 1.930   | 0.964   |    | 30 | 347 | 100 |    | 120 | 67  | 3   | 188 | 21  | 56 | 2   | 17.1 |    | 52  | 2  | 42 |    |    |    | 4  | 3  |   |
| CR7-112 | 16.48   | 9.9      | 10.29 | 9.9   | 9.11 | 0.23   | 2.28    | 0.181 | 0.979   | 0.115   |    | 39 | 239 | 289 |    | 173 | 103 | 71  | 185 | 1   | 85 | 22  | 0.4  |    | 88  | 0  | 0  |    |    |    | 0  | 0  |   |
| CR7-113 | 47.36   | 17.33    | 10.62 | 10.47 | 7.82 | 0.2    | 2.39    | 0.194 | 1.007   | 0.12    |    | 35 | 250 | 302 |    | 171 | 111 | 72  | 2   | 202 | 23 | 57  | 2.5  |    | 123 | 9  | 14 |    |    |    | 0  | 1  |   |
| CR7-114 | 55.66   | 14.16    | 10.31 | 8.18  | 4.56 | 1.37   | 3.36    | 0.255 | 1.458   | 0.239   |    | 33 | 327 | 43  |    | 20  | 173 | 89  | 22  | 226 | 36 | 122 | 12.2 |    | 434 | 13 | 22 |    |    |    | 3  | 2  |   |
| CR7-115 | 50.63   | 16.5     | 11.1  | 8.58  | 4.1  | 1.26   | 3.37    | 0.158 | 2.667   | 0.388   |    | 26 | 256 | 71  |    | 52  | 124 | 114 | 33  | 412 | 36 | 201 | 16.3 |    | 474 | 13 | 51 |    |    |    | 7  | 3  |   |
| CR7-116 | 55.92   | 14.09    | 10.5  | 7.47  | 3.88 | 1.79   | 3.26    | 0.18  | 1.98    | 0.312   |    | 32 | 294 | 23  |    | 10  | 47  | 113 | 50  | 346 | 34 | 179 | 12.7 |    | 629 | 11 | 57 |    |    |    | 4  | 7  |   |
| CR7-117 | 56.02   | 14.36    | 9.67  | 7.88  | 4.1  | 1.58   | 3.45    | 0.232 | 1.992   | 0.352   |    | 27 | 312 | 25  |    | 10  | 63  | 109 | 43  | 355 | 35 | 183 | 14.5 |    | 741 | 22 | 45 |    |    |    | 3  | 4  |   |
| CR7-118 | 52.68   | 13.39    | 13.71 | 7.43  | 3.65 | 1.56   | 3.68    | 0.205 | 2.53    | 0.408   |    | 33 | 432 | 52  |    | 1   | 200 | 125 | 33  | 370 | 41 | 180 | 11.2 |    | 671 | 21 | 37 |    |    |    | 4  | 3  |   |
| CR7-119 | 49.82   | 15.82    | 11.63 | 9.67  | 6.05 | 0.68   | 3.17    | 0.177 | 2.181   | 0.373   |    | 28 | 288 | 71  |    | 66  | 21  | 112 | 12  | 461 | 30 | 171 | 15.4 |    | 371 | 19 | 46 |    |    |    | 0  | 5  |   |
| CR7-120 | 50.69   | 14.2     | 12.34 | 9.92  | 5.62 | 0.7    | 3.14    | 0.185 | 2.347   | 0.312   |    | 34 | 320 | 100 |    | 24  | 40  | 114 | 14  | 411 | 31 | 169 | 13.9 |    | 369 | 20 | 41 |    |    |    | 1  | 4  |   |
| CR7-121 | 48.82   | 16.38    | 12.29 | 9.1   | 5.8  | 0.85   | 3.21    | 0.173 | 2.335   | 0.322   |    | 30 | 261 | 89  |    | 99  | 88  | 107 | 17  | 413 | 30 | 172 | 13.7 |    | 399 | 0  | 54 |    |    |    | 3  | 1  |   |
| CR7-122 | 50.38   | 17.2     | 11.12 | 9.02  | 4.39 | 0.97   | 3.43    | 0.155 | 2.264   | 0.325   |    | 27 | 237 | 93  |    | 76  | 133 | 103 | 23  | 450 | 31 | 168 | 12.3 |    | 439 | 11 | 39 |    |    |    | 1  | 1  |   |

Page 4 of 4
