# Supplementary material
Source: publisher figshare collection journal article supplement (https://gsapubs.figshare.com/articles/dataset/_/12529988)
Supplement: Supplementary file 2 [file 1]

## DATA REPOSITORY FOR:

### The Steens Basalt: Earliest Lavas of the Columbia River Basalt Group

Camp, V.E., Ross, M.E., Duncan, R.A., Jarboe, N.A., Coe, R.S., Hanan, B.B., and Johnson, J.A.

- (1) Major- and trace-element analyses of Stratigraphic Sections
- (2) Details of Ar-Ar Geochronology

## MAJOR-ELEMENT ANALYSES OF STRATIGRAPHIC SECTIONS

## ABERT RIM POWERLINE ROAD SECTION:

| SAMPLE   | SiO[2] | Al[2]O[3] | FeO   | CaO   | MgO   | K[2]O | Na[2]O | MnO   | TiO[2] | P[2]O[5] |
|----------|--------|-----------|-------|-------|-------|-------|--------|-------|--------|----------|
| CR6-618  | 48.19  | 15.29     | 13.21 | 8.91  | 5.006 | 1.194 | 3.34   | 0.203 | 2.739  | 0.496    |
| CR6-618A | 48.32  | 14.85     | 13.37 | 8.9   | 4.966 | 1.217 | 3.31   | 0.202 | 2.814  | 0.529    |
| CR6-618B | 49.07  | 16.48     | 11.86 | 9.32  | 4.344 | 1.166 | 3.38   | 0.185 | 2.52   | 0.476    |
| CR6-618C | 48     | 14.67     | 13.78 | 8.86  | 4.622 | 1.181 | 3.2    | 0.203 | 2.865  | 0.525    |
| CR6-619  | 48.57  | 16.41     | 10.62 | 10.58 | 6.855 | 0.736 | 2.93   | 0.19  | 1.51   | 0.268    |
| CR6-620  | 48.65  | 16.42     | 10.7  | 10.74 | 6.92  | 0.639 | 2.87   | 0.185 | 1.522  | 0.272    |
| CR6-621  | 48.32  | 16.39     | 10.75 | 10.72 | 7.064 | 0.641 | 2.89   | 0.174 | 1.512  | 0.268    |
| CR6-622  | 48.43  | 16.86     | 11.73 | 9.65  | 5.299 | 0.876 | 3.31   | 0.179 | 2.162  | 0.392    |
| CR6-623  | 48.72  | 17.77     | 11.51 | 9.91  | 5.371 | 0.844 | 3.28   | 0.191 | 1.74   | 0.322    |
| CR6-624  | 47.2   | 17.38     | 11.11 | 10.86 | 5.282 | 0.809 | 3.18   | 0.18  | 1.663  | 0.305    |
| CR6-625  | 48.56  | 15.78     | 12.91 | 8.62  | 4.659 | 1.367 | 3.5    | 0.197 | 2.818  | 0.538    |
| CR6-626  | 48.27  | 15.46     | 13.21 | 8.57  | 4.805 | 1.301 | 3.46   | 0.201 | 2.864  | 0.526    |
| CR6-627  | 47.88  | 14.81     | 13.66 | 8.36  | 4.896 | 1.327 | 3.4    | 0.198 | 2.979  | 0.552    |
| CR6-628  | 48.25  | 15.13     | 13.36 | 8.42  | 4.862 | 1.368 | 3.5    | 0.204 | 2.925  | 0.591    |
| CR6-629  | 48.18  | 14.76     | 13.33 | 8.73  | 4.833 | 1.274 | 3.31   | 0.199 | 2.87   | 0.539    |
| CR6-630  | 48.14  | 15        | 13.47 | 8.74  | 5.172 | 1.205 | 3.28   | 0.201 | 2.791  | 0.508    |
| CR6-631  | 48.03  | 14.75     | 13.69 | 8.67  | 5.154 | 1.259 | 3.35   | 0.203 | 2.872  | 0.511    |
| CR6-632  | 47.51  | 16.99     | 11.32 | 10.07 | 6.044 | 0.592 | 2.97   | 0.2   | 1.655  | 0.258    |

## ADEL SECTION:

| SAMPLE    | SiO[2] | Al[2]O[3] | FeO   | CaO   | MgO   | K[2]O | Na[2]O | MnO   | TiO[2] | P[2]O[5] |
|-----------|--------|-----------|-------|-------|-------|-------|--------|-------|--------|----------|
| CR04-553  | 45.16  | 14.91     | 10.53 | 9.95  | 9.41  | 0.82  | 1.97   | 0.155 | 1.918  | 0.178    |
| CR04-554  | 45.48  | 14.51     | 11.18 | 9.94  | 10.09 | 0.58  | 2.08   | 0.166 | 2.079  | 0.186    |
| CR04-555  | 46.14  | 14.66     | 11.33 | 10.75 | 10.27 | 0.45  | 2.17   | 0.168 | 1.98   | 0.186    |
| CR04-556  | 45.87  | 15.22     | 12.15 | 9.96  | 8.73  | 0.62  | 2.31   | 0.187 | 1.877  | 0.245    |
| CR04-557  | 45.49  | 13.15     | 11.49 | 10.1  | 11.61 | 0.41  | 1.93   | 0.187 | 1.427  | 0.182    |
| CR04-558  | 46.39  | 14.2      | 10.9  | 10.86 | 9.67  | 0.42  | 2.11   | 0.18  | 1.485  | 0.188    |
| CR04-564  | 46.83  | 15.13     | 10.41 | 12    | 7.03  | 0.44  | 2.27   | 0.161 | 1.603  | 0.2      |
| CR04-565  | 46.28  | 14.2      | 10.73 | 10.97 | 9.37  | 0.4   | 2.09   | 0.177 | 1.447  | 0.185    |
| CR04-565I | 47.85  | 14.84     | 11.17 | 11.53 | 8.73  | 0.45  | 2.36   | 0.177 | 1.608  | 0.201    |
| CR04-566  | 47.02  | 15.45     | 11.14 | 10.28 | 8.19  | 0.53  | 2.44   | 0.175 | 1.745  | 0.226    |
| CR04-567  | 48.61  | 16.09     | 10.47 | 10.23 | 7.38  | 0.72  | 2.82   | 0.159 | 1.556  | 0.28     |
| CR04-568  | 47.2   | 16.47     | 11.59 | 9.64  | 6.9   | 0.66  | 2.94   | 0.172 | 1.805  | 0.256    |
| CR04-569  | 46.51  | 15.92     | 10.35 | 9.93  | 8.77  | 0.44  | 2.28   | 0.189 | 1.41   | 0.193    |
| CR04-570  | 47.34  | 16.15     | 10.05 | 10.06 | 8.13  | 0.58  | 2.44   | 0.158 | 1.456  | 0.225    |
| CR04-571  | 46.81  | 15.76     | 10.92 | 10.09 | 8.5   | 0.52  | 2.57   | 0.166 | 1.568  | 0.214    |

## BLACK CANYON RESERVOIR SECTION:

| SAMPLE   | SiO[2] | Al[2]O[3] | FeO   | CaO   | MgO  | K[2]O | Na[2]O | MnO   | TiO[2] | P[2]O[5] |
|----------|--------|-----------|-------|-------|------|-------|--------|-------|--------|----------|
| CR03-475 | 46.78  | 16.07     | 10.19 | 9.82  | 5.82 | 0.45  | 2.78   | 0.188 | 2.078  | 0.309    |
| CR03-475 | 49.55  | 16.2      | 10.22 | 8.82  | 4.89 | 1.09  | 3.4    | 0.171 | 1.818  | 0.476    |
| CR03-476 | 47.3   | 16.21     | 10.27 | 9.81  | 5.65 | 0.56  | 2.86   | 0.143 | 2.13   | 0.32     |
| CR03-477 | 48.86  | 15.84     | 11.06 | 9.65  | 5.82 | 0.75  | 3.04   | 0.191 | 2.068  | 0.336    |
| CR03-478 | 48.08  | 15.61     | 11.36 | 9.72  | 5.78 | 0.64  | 2.98   | 0.154 | 2.087  | 0.35     |
| CR03-479 | 47.29  | 15.55     | 10.91 | 9.37  | 6.63 | 0.59  | 2.88   | 0.169 | 2.046  | 0.333    |
| CR03-480 | 50.92  | 15.82     | 9.92  | 9.08  | 5.48 | 0.82  | 3.15   | 0.186 | 1.559  | 0.266    |
| CR03-481 | 48.58  | 16.13     | 9.67  | 9.53  | 5.14 | 0.47  | 2.92   | 0.147 | 1.574  | 0.265    |
| CR03-482 | 48.69  | 16.45     | 9.74  | 10.65 | 5.11 | 0.5   | 2.96   | 0.19  | 1.724  | 0.294    |
| CR03-483 | 47.08  | 15.45     | 10.64 | 9.76  | 6.39 | 0.51  | 2.69   | 0.158 | 1.656  | 0.274    |
| CR03-484 | 47.55  | 15.58     | 10.53 | 9.58  | 6.31 | 0.97  | 2.67   | 0.182 | 1.689  | 0.282    |
| CR03-485 | 47.21  | 15.48     | 12.47 | 8.12  | 4.47 | 1.05  | 3.17   | 0.188 | 2.936  | 0.51     |
| CR03-486 | 47.74  | 17.07     | 11.34 | 8.98  | 3.77 | 0.86  | 3.44   | 0.205 | 2.705  | 0.473    |
| CR03-487 | 49.03  | 20.2      | 7.77  | 10.47 | 3.92 | 0.52  | 3.21   | 0.119 | 1.341  | 0.236    |
| CR03-488 | 46.96  | 18.53     | 10.05 | 9.04  | 4.65 | 1.09  | 2.91   | 0.175 | 1.749  | 0.29     |
| CR03-489 | 48.75  | 17.87     | 10.14 | 9.67  | 4.77 | 0.58  | 3.2    | 0.164 | 1.695  | 0.293    |
| CR03-490 | 48.32  | 19.7      | 8.21  | 10.36 | 3.82 | 0.36  | 3.22   | 0.149 | 1.444  | 0.246    |
| CR03-491 | 51.19  | 16.67     | 9.24  | 8.31  | 3.13 | 1.42  | 3.65   | 0.18  | 1.898  | 0.543    |
| CR03-492 | 47.41  | 17.42     | 10.25 | 9.59  | 3.87 | 0.62  | 3.17   | 0.121 | 1.829  | 0.442    |
| CR03-493 | 48.58  | 17.2      | 9.79  | 9.23  | 4.45 | 0.84  | 3.17   | 0.151 | 1.694  | 0.411    |
| CR03-494 | 47.18  | 15.87     | 10.52 | 9.12  | 5.82 | 0.66  | 2.88   | 0.166 | 1.876  | 0.281    |

|          |       |       |       |       |      |      |      |       |       |       |
|----------|-------|-------|-------|-------|------|------|------|-------|-------|-------|
| CR03-495 | 45.2  | 15.06 | 11.66 | 9.11  | 6.39 | 0.31 | 2.57 | 0.273 | 1.963 | 0.293 |
| CR03-496 | 45.65 | 15.56 | 12.44 | 10.02 | 4.88 | 0.3  | 2.86 | 0.177 | 2.18  | 0.323 |
| CR03-497 | 45.71 | 15.34 | 12.36 | 10.04 | 4.95 | 0.3  | 2.74 | 0.157 | 2.254 | 0.329 |
| CR03-498 | 45.78 | 15.45 | 12.01 | 9.86  | 5.55 | 0.27 | 2.75 | 0.163 | 2.151 | 0.316 |
| CR03-499 | 46.33 | 15.66 | 11.46 | 9.38  | 5.93 | 0.43 | 2.66 | 0.183 | 1.913 | 0.283 |
| CR03-500 | 45.02 | 15.52 | 11.17 | 8.73  | 6.66 | 0.85 | 2.15 | 0.226 | 1.853 | 0.275 |
| CR03-501 | 45.76 | 15.97 | 11.59 | 9.61  | 4.98 | 0.43 | 2.61 | 0.163 | 1.888 | 0.281 |
| CR03-502 | 48.01 | 16.83 | 9.83  | 9.84  | 5.09 | 0.63 | 2.97 | 0.126 | 1.919 | 0.287 |
| CR03-503 | 46.17 | 16.21 | 12.14 | 10.12 | 4.16 | 0.4  | 2.88 | 0.131 | 2.128 | 0.314 |
| CR03-504 | 48.3  | 16.87 | 10.91 | 9.34  | 4.02 | 0.79 | 3.28 | 0.171 | 2.163 | 0.399 |
| CR03-505 | 46.58 | 16.08 | 11.04 | 8.76  | 5.76 | 0.75 | 2.91 | 0.262 | 2.143 | 0.45  |
| CR03-506 | 48.54 | 16.3  | 11    | 9.11  | 3.77 | 0.86 | 3.27 | 0.188 | 2.217 | 0.461 |
| CR03-507 | 50.63 | 15.77 | 10.82 | 8.24  | 3.16 | 1.54 | 3.55 | 0.172 | 2.3   | 0.538 |
| CR03-508 | 50.12 | 17.35 | 9.83  | 9.29  | 3.47 | 0.82 | 3.54 | 0.234 | 1.871 | 0.426 |
| CR03-509 | 47.97 | 14.87 | 12.84 | 8.96  | 3.97 | 0.81 | 3.15 | 0.24  | 2.854 | 0.658 |

## CATLOW PEAK SECTION:

| SAMPLE      | SiO[2] | Al[2]O[3] | FeO   | CaO   | MgO  | K[2]O | Na[2]O | MnO   | TiO[2] | P[2]O[5] |
|-------------|--------|-----------|-------|-------|------|-------|--------|-------|--------|----------|
| CP-01       | 74.13  | 11.17     | 2.74  | 0.18  | 0.03 | 4.61  | 4.17   | 0.049 | 0.216  | 0.07     |
| CP-02       | 60.2   | 15.37     | 6.77  | 3.78  | 1.29 | 3.58  | 4.49   | 0.131 | 1.526  | 0.656    |
| CP-03       | 47.31  | 16.05     | 12.62 | 8.67  | 6.48 | 0.92  | 3.27   | 0.191 | 2.257  | 0.356    |
| CP-04       | 53.38  | 14.44     | 10.44 | 6.42  | 2.97 | 2.44  | 3.8    | 0.176 | 2.612  | 0.672    |
| CP-05       | 56.12  | 15.58     | 8.22  | 6.13  | 3.69 | 2.39  | 3.39   | 0.131 | 1.462  | 0.291    |
| CP-06       | 49.62  | 16.73     | 10.55 | 8.44  | 4.84 | 1.36  | 3.37   | 0.168 | 1.93   | 0.365    |
| CP-07       | 50.09  | 16.55     | 10.49 | 8.29  | 5.08 | 1.39  | 3.31   | 0.162 | 1.877  | 0.336    |
| CP-08       | 51.33  | 15.57     | 10.9  | 7.65  | 5.27 | 1.5   | 3.45   | 0.176 | 1.973  | 0.359    |
| CP-09       | 53.18  | 15.61     | 9.68  | 6.91  | 4.49 | 1.98  | 3.38   | 0.151 | 1.69   | 0.341    |
| CP-10       | 49     | 18.15     | 10.17 | 9.2   | 5.21 | 1.02  | 3.54   | 0.158 | 1.731  | 0.405    |
| CP-11       | 51.16  | 16.68     | 10    | 8.54  | 4.29 | 1.5   | 3.31   | 0.158 | 1.88   | 0.328    |
| CP-11 (JAI) | 51.42  | 16.73     | 10.1  | 8.37  | 4.22 | 1.42  | 3.48   | 0.158 | 1.908  | 0.336    |
| CP-12       | 51.09  | 16.22     | 10.19 | 8.32  | 4.36 | 1.55  | 3.31   | 0.163 | 1.929  | 0.336    |
| CP-13       | 50.93  | 16.09     | 10.39 | 8.16  | 4.31 | 1.59  | 3.26   | 0.167 | 1.982  | 0.349    |
| CP-13A      | 48.06  | 16.59     | 10.53 | 10.2  | 7.06 | 0.61  | 3.06   | 0.171 | 1.62   | 0.254    |
| CP-14       | 50.45  | 15.67     | 11.08 | 7.9   | 5.28 | 1.59  | 3.25   | 0.168 | 2.04   | 0.385    |
| CP-14A      | 47.65  | 20.91     | 8.14  | 10.93 | 4.04 | 0.45  | 3.17   | 0.134 | 1.368  | 0.198    |
| CP-14AA     | 50.42  | 15.69     | 11.13 | 8.03  | 5.45 | 1.48  | 3.41   | 0.17  | 2.068  | 0.378    |
| CP-15       | 48.25  | 20.4      | 9.21  | 10.45 | 4.34 | 0.58  | 3.25   | 0.14  | 1.509  | 0.213    |
| CP-15A      | 47.77  | 19.42     | 10.24 | 10.38 | 4.75 | 0.57  | 3.22   | 0.157 | 1.68   | 0.235    |
| CP-16       | 47.44  | 20.19     | 9.4   | 10.59 | 4.14 | 0.52  | 3.17   | 0.145 | 1.49   | 0.212    |
| CP-17       | 47.39  | 19.79     | 9.68  | 10.36 | 4.26 | 0.54  | 3.15   | 0.148 | 1.558  | 0.217    |
| CP-18       | 47.67  | 17.3      | 11.73 | 9.28  | 5.91 | 0.71  | 3.21   | 0.178 | 1.856  | 0.263    |
| CP-19       | 48.54  | 16.33     | 11.4  | 8.93  | 5.25 | 1.01  | 3.27   | 0.183 | 2.054  | 0.341    |
| CP-20       | 48.39  | 18.44     | 10.04 | 9.8   | 3.66 | 0.9   | 3.44   | 0.159 | 2.098  | 0.384    |
| CP-20 (JAI) | 49.1   | 19.37     | 9.51  | 9.99  | 3.58 | 0.86  | 3.55   | 0.151 | 1.947  | 0.352    |
| CP-21       | 48.77  | 18.8      | 10.01 | 9.84  | 3.82 | 0.89  | 3.56   | 0.159 | 2.052  | 0.37     |
| CP-22       | 48.53  | 18.43     | 10.2  | 9.6   | 3.96 | 0.91  | 3.54   | 0.161 | 2.089  | 0.372    |
| CP-23       | 48.04  | 15.1      | 13.13 | 8.51  | 4.88 | 1.27  | 3.48   | 0.208 | 2.883  | 0.53     |
| CP-24       | 48.11  | 15.32     | 12.55 | 8.37  | 4.5  | 1.28  | 3.5    | 0.199 | 2.766  | 0.517    |
| CP-25       | 48.03  | 15.04     | 12.95 | 8.67  | 4.77 | 1.29  | 3.42   | 0.206 | 2.888  | 0.521    |
| CP-26       | 48.04  | 17.29     | 10.7  | 8.98  | 3.93 | 1.07  | 3.44   | 0.17  | 2.291  | 0.425    |
| CP-27       | 47.61  | 14.62     | 13.16 | 8.01  | 4.56 | 1.38  | 3.53   | 0.207 | 2.903  | 0.539    |
| CP-28       | 48.36  | 17.18     | 11.19 | 8.94  | 4.06 | 1.11  | 3.53   | 0.177 | 2.417  | 0.45     |
| CP-29       | 48.07  | 15.98     | 12.44 | 8.69  | 4.31 | 1.24  | 3.52   | 0.197 | 2.779  | 0.518    |
| CP-30       | 48.28  | 15.22     | 13.11 | 7.94  | 4.31 | 1.39  | 3.58   | 0.207 | 2.966  | 0.525    |
| CP-31       | 48.01  | 15.34     | 12.95 | 7.98  | 4.28 | 1.33  | 3.54   | 0.207 | 2.884  | 0.502    |
| CP-32       | 46.99  | 16.49     | 11.49 | 10.55 | 7.47 | 0.38  | 2.77   | 0.185 | 1.613  | 0.195    |
| CP-33       | 47.83  | 16.62     | 11.45 | 10.46 | 7.62 | 0.43  | 2.8    | 0.182 | 1.633  | 0.199    |
| CP-34       | 47.92  | 16.59     | 11.52 | 10.44 | 7.65 | 0.46  | 2.81   | 0.183 | 1.633  | 0.199    |
| CP-35       | 47.04  | 16.35     | 11.41 | 10.21 | 7.48 | 0.44  | 2.79   | 0.182 | 1.633  | 0.195    |
| CP-36       | 47.21  | 16.24     | 11.59 | 10.36 | 7.56 | 0.43  | 2.61   | 0.183 | 1.642  | 0.183    |
| CP-38       | 47.25  | 16.23     | 11.54 | 10.37 | 7.07 | 0.46  | 2.61   | 0.184 | 1.664  | 0.183    |
| CP-39       | 47.09  | 16.11     | 11.61 | 10.22 | 7.54 | 0.45  | 2.64   | 0.184 | 1.66   | 0.204    |
| CP-39 (JAI) | 47.24  | 16.13     | 11.63 | 10.34 | 7.72 | 0.45  | 2.64   | 0.184 | 1.681  | 0.191    |
| CP-40       | 47.53  | 15.12     | 12.26 | 9.87  | 7.14 | 0.65  | 2.82   | 0.191 | 2.047  | 0.252    |
| CP-41       | 47.75  | 15.38     | 11.92 | 9.83  | 7.18 | 0.7   | 2.73   | 0.187 | 1.907  | 0.244    |
| CP-42       | 47.53  | 14.14     | 13.47 | 8.36  | 4.86 | 1.42  | 3.35   | 0.212 | 3      | 0.564    |
| CP-43       | 47.87  | 15.3      | 12.6  | 8.8   | 4.39 | 1.22  | 3.41   | 0.2   | 2.873  | 0.516    |
| CP-44       | 47.83  | 14.48     | 11.7  | 8.23  | 4.17 | 1.42  | 3.48   | 0.208 | 2.918  | 0.559    |

|       |       |       |       |       |      |      |      |       |       |       |
|-------|-------|-------|-------|-------|------|------|------|-------|-------|-------|
| CP-45 | 49.36 | 17.43 | 10.49 | 8.85  | 3.71 | 1.3  | 3.69 | 0.17  | 2.434 | 0.497 |
| CP-46 | 48.18 | 16.62 | 11.9  | 8.83  | 3.68 | 1.27 | 3.59 | 0.182 | 2.611 | 0.542 |
| CP-47 | 49.47 | 17.3  | 10.74 | 8.8   | 3.82 | 1.36 | 3.68 | 0.175 | 2.499 | 0.5   |
| CP-48 | 55.74 | 14.86 | 8.39  | 5.83  | 2.59 | 2.94 | 3.27 | 0.137 | 1.89  | 0.443 |
| CP-49 | 47.24 | 16.01 | 10.81 | 10.33 | 7.6  | 0.49 | 2.79 | 0.176 | 1.678 | 0.223 |
| CP-50 | 48.53 | 17.88 | 10.12 | 10    | 4.55 | 0.87 | 3.18 | 0.159 | 1.843 | 0.314 |
| CP-51 | 49.17 | 17.85 | 10.32 | 9.12  | 4.27 | 1.14 | 3.48 | 0.158 | 1.864 | 0.349 |
| CP-52 | 49.26 | 16.7  | 10.97 | 8.96  | 4.76 | 1.27 | 3.43 | 0.171 | 1.94  | 0.359 |
| CP-53 | 49.62 | 13.41 | 12.07 | 8.1   | 4.3  | 1.78 | 3.1  | 0.189 | 2.501 | 0.465 |
| CP-54 | 50.19 | 15.47 | 10.73 | 8.64  | 4.04 | 1.58 | 3.26 | 0.167 | 2.15  | 0.404 |
| CP-55 | 47.92 | 17.53 | 10.85 | 9.86  | 5.43 | 0.78 | 3.03 | 0.164 | 1.904 | 0.257 |
| CP-56 | 48.64 | 19.58 | 9.11  | 10.71 | 4.96 | 0.58 | 3.1  | 0.139 | 1.552 | 0.212 |
| CP-57 | 49.12 | 15.43 | 10.42 | 10.61 | 7.1  | 0.69 | 2.51 | 0.172 | 1.55  | 0.192 |
| CP-58 | 47.93 | 19.88 | 9.45  | 10.52 | 4.08 | 0.6  | 3.22 | 0.141 | 1.707 | 0.258 |
| CP-60 | 48.74 | 19    | 9.49  | 9.9   | 3.91 | 0.92 | 3.41 | 0.145 | 1.757 | 0.321 |
| CP-61 | 47.74 | 19.65 | 9.64  | 10.46 | 4.55 | 0.53 | 3.15 | 0.143 | 1.882 | 0.239 |
| CP-62 | 49.88 | 16.01 | 9.37  | 10.06 | 7.64 | 0.84 | 2.71 | 0.156 | 1.315 | 0.229 |
| CP-63 | 49.72 | 15.68 | 9.7   | 10.07 | 6.87 | 0.94 | 2.75 | 0.164 | 1.486 | 0.247 |
| CP-64 | 49.5  | 15.13 | 10.23 | 10.1  | 5.89 | 0.94 | 2.77 | 0.173 | 1.7   | 0.291 |
| CP-65 | 49.24 | 15.35 | 9.92  | 10.08 | 6.9  | 0.92 | 2.69 | 0.163 | 1.489 | 0.244 |
| CP-66 | 70.39 | 12.29 | 4.24  | 0.46  | 0.09 | 5    | 4.06 | 0.131 | 0.422 | 0.084 |
| CP-67 | 73.55 | 10.61 | 3.58  | 0.38  | 0.08 | 4.57 | 4.24 | 0.092 | 0.305 | 0.027 |

## COTTONWOOD CREEK SECTION:

| SAMPLE   | SiO[2] | Al[2]O[3] | FeO   | CaO   | MgO  | K[2]O | Na[2]O | MnO   | TiO[2] | P[2]O[5] |
|----------|--------|-----------|-------|-------|------|-------|--------|-------|--------|----------|
| CR03-443 | 55.61  | 13.52     | 10.9  | 6.53  | 2.95 | 1.91  | 3.35   | 0.188 | 2.129  | 0.712    |
| CR03-444 | 48.27  | 15.16     | 11.33 | 10.68 | 7.74 | 0.49  | 2.66   | 0.173 | 1.931  | 0.285    |
| CR03-445 | 47.07  | 15.95     | 11.08 | 9.43  | 7.8  | 0.52  | 2.74   | 0.162 | 1.918  | 0.28     |
| CR03-446 | 46.12  | 15.87     | 11.4  | 10.5  | 5.69 | 0.47  | 2.88   | 0.179 | 1.886  | 0.275    |
| CR03-447 | 47.52  | 14.89     | 11.84 | 8.24  | 3.6  | 1.36  | 3.37   | 0.184 | 2.564  | 0.612    |
| CR03-448 | 47.1   | 15.48     | 10.87 | 10.13 | 5.94 | 0.57  | 2.79   | 0.171 | 1.838  | 0.292    |
| CR03-449 | 46.78  | 16.44     | 11.12 | 9.76  | 3.6  | 0.83  | 3.19   | 0.175 | 2.142  | 0.361    |
| CR03-450 | 47.23  | 16.54     | 11.99 | 9.68  | 2.24 | 0.82  | 3.21   | 0.223 | 2.179  | 0.371    |
| CR03-451 | 48.38  | 15.05     | 12    | 9.02  | 5.52 | 0.95  | 3.03   | 0.176 | 2.274  | 0.391    |
| CR03-452 | 46.54  | 15.61     | 11.27 | 9.24  | 7.26 | 1.11  | 2.5    | 0.171 | 1.984  | 0.309    |
| CR03-453 | 46.97  | 15.18     | 11.82 | 9.16  | 6.88 | 0.63  | 2.82   | 0.172 | 2.121  | 0.301    |
| CR03-454 | 48.65  | 15.93     | 11.9  | 8.69  | 5.37 | 0.97  | 3.22   | 0.16  | 2.386  | 0.399    |
| CR03-455 | 50.99  | 15.03     | 10.63 | 8.38  | 4.81 | 1.27  | 2.89   | 0.159 | 2.074  | 0.353    |
| CR03-456 | 49.43  | 15.96     | 10.63 | 9.48  | 5.16 | 0.96  | 2.87   | 0.171 | 1.949  | 0.317    |

## LONE TREE SECTION:

| SAMPLE   | SiO[2] | Al[2]O[3] | FeO   | CaO   | MgO  | K[2]O | Na[2]O | MnO   | TiO[2] | P[2]O[5] |
|----------|--------|-----------|-------|-------|------|-------|--------|-------|--------|----------|
| CR03-460 | 50.68  | 15.37     | 11.61 | 8.3   | 4.44 | 1.22  | 3.21   | 0.172 | 2.255  | 0.448    |
| CR03-461 | 48.05  | 16.21     | 10.91 | 10.47 | 6.95 | 0.36  | 2.81   | 0.188 | 1.827  | 0.24     |
| CR03-462 | 48.33  | 15.52     | 10.71 | 10.88 | 8.23 | 0.26  | 2.53   | 0.199 | 1.713  | 0.184    |
| CR03-463 | 47.95  | 14.66     | 11.03 | 10.66 | 7.93 | 0.31  | 2.41   | 0.192 | 1.707  | 0.193    |
| CR03-464 | 48.17  | 16.28     | 10.89 | 10.78 | 6.73 | 0.31  | 2.72   | 0.167 | 1.735  | 0.218    |
| CR03-465 | 48.75  | 16.11     | 10.92 | 10.09 | 6.78 | 0.45  | 2.82   | 0.181 | 1.829  | 0.259    |
| CR03-466 | 47.92  | 16.39     | 10.87 | 10.89 | 6.7  | 0.28  | 2.72   | 0.173 | 1.718  | 0.216    |
| CR03-467 | 48.05  | 14.63     | 11.27 | 10.87 | 8.2  | 0.3   | 2.5    | 0.178 | 1.806  | 0.217    |
| CR03-468 | 48.34  | 16.36     | 10.91 | 10.75 | 6.73 | 0.33  | 2.74   | 0.155 | 1.732  | 0.222    |
| CR03-469 | 48.73  | 16.23     | 10.91 | 10.24 | 6.98 | 0.5   | 2.95   | 0.167 | 1.779  | 0.251    |
| CR03-470 | 54.07  | 14.88     | 10.5  | 7.05  | 3.11 | 1.88  | 3.29   | 0.153 | 2.612  | 0.504    |
| CR03-471 | 47.03  | 15.08     | 13.65 | 7.61  | 3.35 | 1.8   | 3.72   | 0.182 | 3.716  | 1.19     |
| CR03-472 | 51.52  | 15.1      | 10.53 | 9.69  | 7.7  | 0.65  | 2.84   | 0.171 | 1.901  | 0.31     |
| CR03-473 | 50.45  | 15.22     | 11.25 | 8.8   | 5.88 | 0.8   | 3.19   | 0.161 | 2.396  | 0.633    |
| CR03-474 | 48.92  | 14.83     | 10.82 | 10.31 | 8.44 | 0.28  | 2.5    | 0.162 | 1.699  | 0.197    |

## OREGON CANYON ROAD SECTION:

| SAMPLE | SiO[2] | Al[2]O[3] | FeO   | CaO  | MgO  | K[2]O | Na[2]O | MnO   | TiO[2] | P[2]O[5] |
|--------|--------|-----------|-------|------|------|-------|--------|-------|--------|----------|
| CR-641 | 54.35  | 14.23     | 11.23 | 6.12 | 3.16 | 2.15  | 3.76   | 0.165 | 2.135  | 0.517    |
| CR-642 | 75.14  | 11.69     | 2.69  | 0.11 | 0.07 | 4.63  | 3.96   | 0.024 | 0.224  | 0.025    |
| CR-643 | 75.93  | 11.42     | 2.39  | 0.13 | 0.04 | 4.7   | 4.19   | 0.025 | 0.197  | 0.034    |
| CR-644 | 57.12  | 15.35     | 7     | 6.3  | 2.31 | 2.79  | 4.04   | 0.131 | 2.072  | 0.809    |



|        |       |       |       |      |      |      |      |       |       |       |
|--------|-------|-------|-------|------|------|------|------|-------|-------|-------|
| CR-645 | 53.62 | 13.84 | 11.32 | 7.06 | 3.46 | 1.83 | 3.22 | 0.151 | 2.039 | 0.369 |
| CR-646 | 53.08 | 14.22 | 12.24 | 6.86 | 3.87 | 1.93 | 3.63 | 0.18  | 2.261 | 0.5   |
| CR-647 | 74.12 | 10.88 | 4.07  | 0.54 | 0.01 | 4.58 | 4.34 | 0.115 | 0.381 | 0.046 |
| CR-648 | 74.08 | 11.43 | 3.1   | 0.37 | 0.18 | 4.88 | 4.17 | 0.093 | 0.271 | 0.038 |
| CR-649 | 73.69 | 11.91 | 3.38  | 0.31 | 0.04 | 5    | 4.1  | 0.083 | 0.311 | 0.028 |
| CR-650 | 59.69 | 13.75 | 9.75  | 4.16 | 1.14 | 3.76 | 3.22 | 0.15  | 1.505 | 0.604 |

Note: Tuff of Oregon Canyon can be traced from Oregon Canyon to Oregon Canyon Mtn Rd section. Ttc = 642 and 643. The Tuff of Trout Creek (Tt = 647,

## POKER JIM RIDGE SECTION:

| SAMPLE  | SiO[2] | Al[2]O[3] | FeO   | CaO   | MgO  | K[2]O | Na[2]O | MnO   | TiO[2] | P[2]O[5] |
|---------|--------|-----------|-------|-------|------|-------|--------|-------|--------|----------|
| JM-01   | 47.82  | 17.92     | 10.9  | 11.77 | 6.52 | 0.18  | 2.75   | 0.175 | 1.544  | 0.172    |
| JM-02   | 48.14  | 16.31     | 11.63 | 10.32 | 6.36 | 0.62  | 2.89   | 0.181 | 1.953  | 0.287    |
| JM-03   | 45.81  | 15.64     | 10.73 | 8.7   | 8.51 | 0.52  | 2.41   | 0.142 | 1.627  | 0.237    |
| JM-04   | 48.69  | 16.21     | 10.46 | 10.43 | 7.39 | 0.73  | 2.64   | 0.172 | 1.41   | 0.232    |
| JM-05   | 48.71  | 16.46     | 10.39 | 10.46 | 7.2  | 0.67  | 2.7    | 0.171 | 1.428  | 0.246    |
| JM-06   | 49.11  | 16.76     | 10.03 | 10.76 | 7.28 | 0.64  | 2.74   | 0.166 | 1.401  | 0.228    |
| JM-07   | 48.08  | 15.14     | 10.76 | 10.29 | 7.85 | 0.61  | 2.64   | 0.174 | 1.665  | 0.257    |
| JM-08   | 47.36  | 15.59     | 11.01 | 11.32 | 8.09 | 0.39  | 2.49   | 0.178 | 1.61   | 0.224    |
| JM-09   | 48.81  | 15.75     | 10.95 | 10.51 | 7.44 | 0.65  | 2.73   | 0.181 | 1.685  | 0.215    |
| JM-10   | 48.25  | 15.96     | 10.95 | 10.81 | 7.56 | 0.65  | 2.57   | 0.176 | 1.72   | 0.237    |
| JM-11   | 49.65  | 15.55     | 10.55 | 10.61 | 7.29 | 0.81  | 2.61   | 0.177 | 1.635  | 0.213    |
| JM-12   | 47.83  | 16.1      | 11.72 | 8.84  | 6.13 | 0.84  | 3.12   | 0.17  | 1.927  | 0.311    |
| PJ-01   | 48.89  | 18.81     | 9.92  | 10.08 | 4.43 | 0.76  | 3.35   | 0.185 | 1.877  | 0.328    |
| PJ-02   | 47.55  | 17.34     | 11.23 | 9.58  | 6.02 | 0.78  | 3.17   | 0.171 | 1.745  | 0.315    |
| PJ-03   | 48.03  | 17.47     | 11.16 | 9.72  | 5.56 | 0.77  | 3.24   | 0.188 | 1.707  | 0.307    |
| PJ-04   | 48.71  | 17.69     | 11.13 | 9.79  | 5.19 | 0.9   | 3.33   | 0.177 | 2.001  | 0.367    |
| PJ-05   | 48.91  | 17.13     | 11.03 | 9.61  | 4.6  | 1.02  | 3.43   | 0.178 | 2.31   | 0.417    |
| PJ-06   | 48.56  | 15.92     | 12.83 | 7.78  | 3.86 | 1.4   | 3.64   | 0.183 | 2.542  | 0.49     |
| PJ-07   | 48.56  | 17.52     | 11.65 | 8.61  | 3.9  | 1.16  | 3.57   | 0.185 | 2.161  | 0.421    |
| PJ-08   | 48.62  | 17.99     | 10.24 | 8.83  | 3.66 | 1.16  | 3.63   | 0.18  | 2.119  | 0.388    |
| PJ-09   | 48.35  | 17.01     | 12.01 | 8.43  | 4.21 | 1.21  | 3.57   | 0.2   | 2.258  | 0.408    |
| PJ-10   | 48.46  | 17.03     | 12.03 | 8.36  | 4.23 | 1.18  | 3.56   | 0.172 | 2.24   | 0.405    |
| PJ-12   | 48.45  | 14.26     | 13.95 | 8.14  | 4.85 | 1.48  | 3.51   | 0.24  | 3.094  | 0.576    |
| PJ-13   | 48.31  | 15.11     | 12.72 | 8.27  | 4.37 | 1.45  | 3.57   | 0.382 | 2.819  | 0.54     |
| PJ-14   | 48.63  | 15.24     | 12.82 | 8.32  | 4.41 | 1.46  | 3.61   | 0.386 | 2.842  | 0.545    |
| PJ-15   | 48.88  | 15.31     | 12.93 | 8.59  | 4.59 | 1.35  | 3.48   | 0.204 | 2.849  | 0.54     |
| PJ-16   | 48.95  | 16.65     | 11.62 | 8.76  | 4    | 1.34  | 3.44   | 0.195 | 2.631  | 0.512    |
| PJ-16x2 | 48.47  | 16.25     | 12.03 | 8.58  | 4.29 | 1.28  | 3.47   | 0.206 | 2.665  | 0.502    |
| PJ-17   | 49.31  | 17.36     | 11.3  | 8.96  | 4    | 1.26  | 3.61   | 0.179 | 2.524  | 0.477    |
| PJ-18   | 49.55  | 17.56     | 11.28 | 8.98  | 4.08 | 1.26  | 3.6    | 0.174 | 2.48   | 0.466    |
| PJ-19   | 48.83  | 16.69     | 11.88 | 8.83  | 4.41 | 1.24  | 3.5    | 0.181 | 2.595  | 0.47     |
| PJ-20   | 48.36  | 15.03     | 13.16 | 8.37  | 4.42 | 1.44  | 3.32   | 0.214 | 2.907  | 0.546    |
| PJ-21   | 48.17  | 14.73     | 13.16 | 8.33  | 4.47 | 1.38  | 3.44   | 0.216 | 2.928  | 0.549    |
| PJ-21x2 | 48.03  | 15.1      | 12.98 | 8.27  | 4.6  | 1.36  | 3.43   | 0.207 | 2.829  | 0.522    |
| PJ-22   | 48.88  | 16.27     | 12.01 | 8.83  | 4.48 | 1.24  | 3.42   | 0.185 | 2.621  | 0.492    |
| PJ-23   | 47.64  | 14.69     | 12.96 | 8.47  | 4.76 | 1.36  | 3.17   | 0.199 | 2.832  | 0.527    |
| PJ-24   | 49.01  | 16.23     | 12.08 | 8.85  | 4.54 | 1.22  | 3.41   | 0.202 | 2.619  | 0.482    |
| PJ-25   | 47.82  | 14.34     | 13.56 | 8.4   | 4.74 | 1.32  | 3.26   | 0.214 | 2.995  | 0.565    |
| PJ-26   | 48.73  | 16.45     | 11.84 | 8.94  | 4.1  | 1.36  | 3.21   | 0.183 | 2.547  | 0.489    |
| PJ-27   | 51.02  | 14.46     | 11.91 | 7.47  | 3.71 | 1.95  | 3.93   | 0.243 | 2.506  | 0.747    |
| PJ-28   | 50.96  | 14.54     | 11.98 | 7.63  | 3.92 | 1.95  | 4.04   | 0.229 | 2.511  | 0.749    |
| PJ-29   | 46.68  | 17.14     | 11.35 | 9.49  | 4.69 | 0.97  | 3.4    | 0.189 | 2.184  | 0.37     |
| PJ-30   | 47.76  | 17.35     | 11.53 | 9.73  | 4.65 | 0.68  | 3.07   | 0.284 | 1.709  | 0.254    |
| PJ-31   | 46.85  | 16.47     | 11.13 | 9.77  | 5.96 | 0.67  | 2.96   | 0.194 | 1.677  | 0.245    |
| PJ-32   | 47.55  | 17.16     | 11.3  | 9.57  | 5.12 | 0.67  | 3.06   | 0.298 | 1.657  | 0.24     |
| PJ-33   | 47.88  | 17.41     | 11.2  | 9.71  | 6    | 0.57  | 3.03   | 0.178 | 1.639  | 0.239    |
| PJ-34   | 48.72  | 15.29     | 12.93 | 7.68  | 3.93 | 1.55  | 3.59   | 0.225 | 2.756  | 0.527    |
| PJ-35   | 48.57  | 15.1      | 13.09 | 7.61  | 4.15 | 1.54  | 3.56   | 0.197 | 2.798  | 0.536    |
| PJ-36   | 48.2   | 16.18     | 12.18 | 8.74  | 5.29 | 0.89  | 3.4    | 0.2   | 2.133  | 0.331    |
| PJ-37   | 52.36  | 13.69     | 12.08 | 7.1   | 3.73 | 1.85  | 3.32   | 0.198 | 2.534  | 0.538    |
| PJ-38   | 52.53  | 13.8      | 12.16 | 7.16  | 3.62 | 1.7   | 3.44   | 0.204 | 2.56   | 0.539    |
| PJ-39   | 52.08  | 13.85     | 12.08 | 7.36  | 3.78 | 1.8   | 3.31   | 0.194 | 2.478  | 0.506    |
| PJ-40   | 47.47  | 17.34     | 7.95  | 13.26 | 9.52 | 0.25  | 2      | 0.159 | 0.644  | 0.129    |

## REYNOLDS SECTION:

| SAMPLE | SiO[2] | Al[2]O[3] | FeO | CaO | MgO | K[2]O | Na[2]O | MnO | TiO[2] | P[2]O[5] |
|--------|--------|-----------|-----|-----|-----|-------|--------|-----|--------|----------|
|--------|--------|-----------|-----|-----|-----|-------|--------|-----|--------|----------|

|       |       |       |       |       |      |      |      |       |       |       |
|-------|-------|-------|-------|-------|------|------|------|-------|-------|-------|
| CR423 | 47.47 | 15.18 | 11.13 | 9.78  | 9.3  | 0.35 | 2.5  | 0.159 | 1.86  | 0.224 |
| CR424 | 47.25 | 16.2  | 11.63 | 10.38 | 4.34 | 0.39 | 2.68 | 0.107 | 1.931 | 0.219 |
| CR425 | 49.17 | 14.06 | 10.68 | 9.55  | 8.18 | 0.39 | 2.44 | 0.158 | 1.738 | 0.233 |
| CR426 | 49.97 | 14.16 | 10.64 | 9.49  | 8.84 | 0.55 | 2.45 | 0.153 | 1.734 | 0.24  |
| CR427 | 47.83 | 16.18 | 11.09 | 10.62 | 7.38 | 0.35 | 2.86 | 0.156 | 1.938 | 0.293 |
| CR428 | 48.95 | 14.06 | 10.37 | 9.24  | 9.45 | 0.29 | 2.19 | 0.132 | 1.605 | 0.217 |
| CR429 | 48.76 | 15.86 | 10.52 | 9.15  | 7.11 | 0.78 | 2.82 | 0.149 | 1.856 | 0.304 |
| CR430 | 47.51 | 15.45 | 11.3  | 10.26 | 8.77 | 0.41 | 2.65 | 0.172 | 1.777 | 0.245 |
| CR431 | 49.69 | 14.03 | 10.7  | 9.79  | 8.91 | 0.17 | 2.26 | 0.187 | 1.691 | 0.226 |
| CR432 | 50.19 | 13.99 | 10.81 | 9.31  | 9.54 | 0.54 | 2.45 | 0.164 | 1.744 | 0.236 |
| CR433 | 50.05 | 14.23 | 10.53 | 9.33  | 9.24 | 0.52 | 2.43 | 0.154 | 1.736 | 0.231 |
| CR434 | 48.5  | 15.57 | 10.95 | 9.25  | 6.75 | 0.78 | 2.79 | 0.161 | 1.87  | 0.301 |
| CR435 | 48.71 | 15.28 | 10.48 | 10.29 | 8.66 | 0.48 | 2.52 | 0.146 | 1.763 | 0.258 |
| CR436 | 48.77 | 15.85 | 10.77 | 9.82  | 7.82 | 0.58 | 2.75 | 0.146 | 1.857 | 0.3   |
| CR437 | 47.9  | 15.76 | 11.32 | 10.12 | 8.98 | 0.41 | 2.72 | 0.174 | 1.783 | 0.25  |
| CR438 | 66.68 | 13.55 | 5.94  | 3.32  | 0.86 | 3.36 | 3    | 0.07  | 0.945 | 0.223 |

## SQUAW CREEK SECTION:

| SAMPLE | SiO[2] | Al[2]O[3] | FeO   | CaO  | MgO  | K[2]O | Na[2]O | MnO   | TiO[2] | P[2]O[5] |
|--------|--------|-----------|-------|------|------|-------|--------|-------|--------|----------|
| CR356  | 51.05  | 15.02     | 10.19 | 8.13 | 3.85 | 1.14  | 2.99   | 0.168 | 2.28   | 0.455    |
| CR357  | 48.08  | 15.6      | 11.16 | 9.5  | 6.91 | 0.58  | 2.86   | 0.152 | 1.98   | 0.309    |
| CR358  | 46.94  | 15.41     | 11.24 | 9.92 | 8.23 | 0.46  | 2.7    | 0.17  | 1.866  | 0.269    |
| CR359  | 47.08  | 15.58     | 11.2  | 10   | 8.5  | 0.44  | 2.68   | 0.173 | 1.786  | 0.252    |
| CR360  | 49.82  | 15.83     | 10.6  | 9.06 | 5.64 | 0.82  | 3.06   | 0.154 | 2.177  | 0.38     |
| CR361  | 47.93  | 17.35     | 11.54 | 9.13 | 4.06 | 0.75  | 3.38   | 0.183 | 2.557  | 0.467    |
| CR362  | 48.39  | 16.25     | 11.46 | 8.42 | 5.33 | 1.01  | 3.25   | 0.149 | 2.531  | 0.458    |
| CR363  | 47.2   | 16.02     | 12.26 | 8.61 | 6.4  | 0.74  | 3.08   | 0.168 | 2.288  | 0.393    |
| CR364  | 48.99  | 16.61     | 11.02 | 9.01 | 5.76 | 0.87  | 3.16   | 0.154 | 2.146  | 0.334    |
| CR365  | 47.69  | 16.43     | 11.79 | 9.08 | 5.41 | 0.61  | 3.12   | 0.163 | 2.06   | 0.339    |
| CR366  | 48.64  | 16.17     | 11.06 | 9.14 | 5.17 | 0.94  | 3.16   | 0.238 | 2.274  | 0.368    |
| CR367  | 50.95  | 15.73     | 10.63 | 8.24 | 4.78 | 1.25  | 3.31   | 0.136 | 2.202  | 0.489    |
| CR368  | 47.2   | 16.01     | 10.98 | 8.74 | 7.32 | 0.59  | 2.77   | 0.133 | 1.862  | 0.274    |
| CR369  | 50.23  | 15.91     | 10.41 | 8.73 | 6.44 | 0.96  | 3.03   | 0.138 | 1.747  | 0.3      |
| CR370  | 51.89  | 14.62     | 11.55 | 7.9  | 4.17 | 1.7   | 3.12   | 0.163 | 2.644  | 0.519    |
| CR371  | 50.35  | 16.69     | 10.36 | 8.76 | 5.89 | 0.74  | 3.51   | 0.154 | 1.918  | 0.327    |

## STEENS MOUNTAIN SECTION:

| SAMPLE  | SiO[2] | Al[2]O[3] | FeO   | CaO   | MgO   | K[2]O | Na[2]O | MnO   | TiO[2] | P[2]O[5] |
|---------|--------|-----------|-------|-------|-------|-------|--------|-------|--------|----------|
| MF94-63 | 49.71  | 16.27     | 11.19 | 9.26  | 6.96  | 0.88  | 3.02   | 0.17  | 2.22   | 0.31     |
| MF94-64 | 49.85  | 18.39     | 9.84  | 10.62 | 5.03  | 0.6   | 3.14   | 0.16  | 2.09   | 0.29     |
| MF94-65 | 49.45  | 14.71     | 11.49 | 9.18  | 8.89  | 0.89  | 2.85   | 0.18  | 2.03   | 0.33     |
| MF94-66 | 49.34  | 14.32     | 11.06 | 9.88  | 10.09 | 0.64  | 2.45   | 0.18  | 1.81   | 0.23     |
| MD94-67 | 50.24  | 14.77     | 11.81 | 10.23 | 6.51  | 0.79  | 2.87   | 0.18  | 2.32   | 0.28     |
| MF94-68 | 50.9   | 16.09     | 9.76  | 10.32 | 7.01  | 0.69  | 2.87   | 0.17  | 1.96   | 0.23     |
| MF94-69 | 49.43  | 14.77     | 10.37 | 10.28 | 9.82  | 0.56  | 2.58   | 0.17  | 1.81   | 0.21     |
| MF94-70 | 49.88  | 18.11     | 9.53  | 10.42 | 6.01  | 0.59  | 3.04   | 0.16  | 1.97   | 0.29     |
| MF9471A | 49.01  | 15.51     | 11.66 | 10.16 | 7.31  | 0.69  | 2.94   | 0.18  | 2.23   | 0.3      |
| MF9471B | 48.91  | 16.55     | 11.24 | 10.13 | 6.64  | 0.69  | 3.14   | 0.18  | 2.22   | 0.31     |
| MF9471C | 49.15  | 15.34     | 11.41 | 10.21 | 7.52  | 0.74  | 2.93   | 0.19  | 2.23   | 0.3      |
| MF94-72 | 49.42  | 14.22     | 10.72 | 9.92  | 10.72 | 0.51  | 2.44   | 0.18  | 1.67   | 0.21     |
| JS001   | 50.26  | 17.74     | 9.73  | 9.99  | 6.1   | 0.77  | 2.99   | 0.12  | 2      | 0.29     |
| JS002   | 50.15  | 14.66     | 10.63 | 10.6  | 8.57  | 0.66  | 2.39   | 0.179 | 1.936  | 0.228    |
| JS003   | 50.78  | 16.16     | 9.94  | 10.33 | 6.93  | 0.68  | 2.78   | 0.169 | 1.982  | 0.235    |
| JS004   | 49.06  | 14.35     | 10.89 | 9.99  | 10.66 | 0.57  | 2.31   | 0.177 | 1.786  | 0.209    |
| JS005   | 49.4   | 16.84     | 10.38 | 10.78 | 7.12  | 0.5   | 2.67   | 0.166 | 1.923  | 0.222    |
| JS006   | 50.42  | 16.44     | 9.96  | 10.65 | 6.66  | 0.67  | 2.76   | 0.167 | 2.043  | 0.234    |
| JS007   | 49.06  | 14.89     | 12.82 | 10.43 | 6.29  | 0.53  | 2.81   | 0.197 | 2.66   | 0.31     |
| JS008   | 49.97  | 14.76     | 11.2  | 10.83 | 7.43  | 0.61  | 2.52   | 0.184 | 2.243  | 0.265    |
| JS009   | 50.16  | 14.92     | 11.15 | 10.63 | 7.31  | 0.7   | 2.52   | 0.168 | 2.197  | 0.253    |
| JS010   | 48.93  | 14.71     | 11.99 | 11.08 | 7.33  | 0.54  | 2.48   | 0.192 | 2.485  | 0.263    |
| JS011   | 48.03  | 15.79     | 10.96 | 10.74 | 9.79  | 0.28  | 2.26   | 0.172 | 1.798  | 0.182    |
| JS012   | 48.83  | 15.16     | 10.95 | 11.36 | 8.58  | 0.36  | 2.33   | 0.181 | 2.033  | 0.214    |
| JS013   | 48.82  | 13.39     | 11.34 | 9.6   | 12.02 | 0.57  | 2.14   | 0.185 | 1.722  | 0.205    |
| JS014   | 49.29  | 14.36     | 10.68 | 10.37 | 10.74 | 0.37  | 2.22   | 0.175 | 1.629  | 0.171    |
| JS015   | 50.21  | 15.06     | 10.12 | 10.82 | 8.94  | 0.39  | 2.36   | 0.176 | 1.727  | 0.192    |
| JS016   | 49.61  | 14.87     | 10.21 | 10.24 | 9.87  | 0.53  | 2.45   | 0.168 | 1.825  | 0.225    |

|       |       |       |       |       |      |      |      |       |       |       |
|-------|-------|-------|-------|-------|------|------|------|-------|-------|-------|
| JS017 | 50.57 | 14.82 | 9.55  | 10.05 | 9.76 | 0.59 | 2.46 | 0.17  | 1.823 | 0.213 |
| JS018 | 50.23 | 15.26 | 10.13 | 10.3  | 8.61 | 0.68 | 2.6  | 0.165 | 1.827 | 0.207 |
| JS019 | 51.56 | 15.32 | 11.02 | 9.19  | 5.15 | 1.17 | 3.25 | 0.19  | 2.77  | 0.376 |
| JS020 | 51.57 | 14.69 | 12.01 | 8.81  | 5.22 | 1.38 | 3.01 | 0.196 | 2.72  | 0.394 |
| JS021 | 50.72 | 14.73 | 12.02 | 9.27  | 5.68 | 1.09 | 3.17 | 0.197 | 2.72  | 0.39  |
| JS022 | 49.49 | 16.13 | 10.16 | 10.5  | 8.44 | 0.48 | 2.58 | 0.166 | 1.845 | 0.19  |
| JS023 | 49.86 | 16.28 | 10.45 | 9.76  | 7.73 | 0.59 | 2.96 | 0.168 | 1.978 | 0.233 |
| JS024 | 50.19 | 15.02 | 11.51 | 10.07 | 6.23 | 0.68 | 3.17 | 0.196 | 2.639 | 0.309 |
| JS025 | 48.87 | 15.84 | 11.22 | 10.16 | 7.99 | 0.53 | 2.89 | 0.179 | 2.087 | 0.243 |
| JS026 | 49.5  | 15.88 | 10.61 | 10.01 | 8.16 | 0.52 | 2.89 | 0.181 | 2.007 | 0.251 |
| JS027 | 49.66 | 16.65 | 9.62  | 10.39 | 8.41 | 0.59 | 2.68 | 0.165 | 1.63  | 0.205 |
| JS028 | 49.37 | 15.95 | 11.56 | 9.02  | 8.05 | 0.64 | 3.06 | 0.175 | 1.89  | 0.285 |
| JS029 | 50.07 | 17.39 | 10.24 | 9.82  | 6.05 | 0.67 | 3.27 | 0.168 | 2.031 | 0.297 |
| JS030 | 49.44 | 15.15 | 12.07 | 9.27  | 7.5  | 0.69 | 3.14 | 0.199 | 2.236 | 0.302 |
| JS031 | 49.25 | 16.56 | 11.09 | 9.69  | 7.53 | 0.72 | 2.74 | 0.186 | 1.941 | 0.289 |
| JS032 | 53.67 | 16.3  | 9.52  | 7.85  | 4.67 | 1.96 | 3.61 | 0.156 | 1.782 | 0.481 |
| JS033 | 52.39 | 15.98 | 10.55 | 8.1   | 4.88 | 1.75 | 3.59 | 0.19  | 2.087 | 0.484 |
| JS034 | 51.05 | 16.19 | 10.59 | 8.76  | 6.17 | 1.21 | 3.43 | 0.188 | 2.007 | 0.395 |
| JS035 | 49.51 | 15.54 | 12.45 | 8.67  | 6.06 | 1.36 | 3    | 0.191 | 2.76  | 0.464 |
| JS036 | 50.19 | 16.08 | 11.45 | 9.15  | 6.06 | 1.1  | 3.29 | 0.187 | 2.1   | 0.372 |
| JS037 | 51.26 | 15.1  | 11.71 | 8.13  | 5.43 | 1.5  | 3.52 | 0.193 | 2.632 | 0.518 |
| JS038 | 50    | 15.41 | 12.22 | 8.99  | 5.56 | 1.26 | 3.39 | 0.198 | 2.517 | 0.455 |
| JS039 | 50.13 | 14.26 | 12.94 | 8.27  | 5.22 | 1.46 | 3.65 | 0.222 | 3.25  | 0.597 |
| JS040 | 49.01 | 14.86 | 13.35 | 8.62  | 5.66 | 1.22 | 3.58 | 0.212 | 2.94  | 0.548 |
| JS041 | 51.71 | 15.52 | 11.41 | 8.01  | 4.46 | 2.16 | 3.34 | 0.195 | 2.608 | 0.595 |
| JS041 | 51.71 | 15.52 | 11.41 | 8.01  | 4.46 | 2.16 | 3.34 | 0.195 | 2.608 | 0.595 |
| JS042 | 48.94 | 15.15 | 13.48 | 8.42  | 6.15 | 1.34 | 3.18 | 0.197 | 2.68  | 0.456 |
| JS043 | 50.85 | 15.73 | 11.13 | 9.47  | 5.73 | 1.25 | 3.14 | 0.184 | 2.127 | 0.399 |
| JS044 | 49.81 | 15.93 | 10.99 | 10.11 | 7.17 | 0.56 | 3.05 | 0.176 | 1.911 | 0.297 |
| JS045 | 49.81 | 14.7  | 12.98 | 8.83  | 5.36 | 1.28 | 3.52 | 0.212 | 2.78  | 0.525 |
| JS046 | 49.52 | 16.99 | 11.63 | 8.64  | 6.09 | 0.89 | 3.73 | 0.185 | 1.977 | 0.345 |
| JS047 | 50.55 | 14.56 | 12.91 | 8.24  | 4.91 | 1.67 | 3.42 | 0.214 | 2.94  | 0.569 |
| JS048 | 50.59 | 14.47 | 12.95 | 8.17  | 4.9  | 1.63 | 3.55 | 0.21  | 2.95  | 0.577 |
| JS049 | 49.95 | 15.23 | 12.51 | 8.67  | 5.38 | 1.33 | 3.44 | 0.207 | 2.78  | 0.511 |
| JS050 | 49.76 | 14.89 | 13.02 | 8.79  | 5.27 | 1.17 | 3.57 | 0.21  | 2.83  | 0.483 |
| JS051 | 49.12 | 16.1  | 12.73 | 8.89  | 5.76 | 0.96 | 3.56 | 0.194 | 2.295 | 0.384 |
| JS052 | 49.96 | 14.37 | 13.95 | 7.8   | 4.3  | 1.71 | 3.82 | 0.224 | 3.19  | 0.68  |
| JS053 | 50.19 | 17.15 | 11.22 | 8.61  | 4.58 | 1.22 | 3.82 | 0.185 | 2.539 | 0.484 |
| JS054 | 48.75 | 16.37 | 12.03 | 9.02  | 6.39 | 0.96 | 3.47 | 0.196 | 2.403 | 0.42  |
| JS055 | 50.03 | 18.25 | 10.38 | 9.26  | 4.73 | 0.95 | 3.66 | 0.156 | 2.191 | 0.395 |
| JS056 | 53.14 | 15.12 | 11.27 | 6.94  | 4.17 | 2.16 | 3.71 | 0.182 | 2.348 | 0.482 |
| JS057 | 53.62 | 15.12 | 11.27 | 6.94  | 4.17 | 2.16 | 3.71 | 0.182 | 2.348 | 0.482 |
| JS058 | 49.86 | 16.82 | 12.09 | 8.27  | 5.72 | 1.12 | 3.53 | 0.179 | 2.048 | 0.376 |
| JS059 | 52.17 | 16.25 | 11.63 | 7.14  | 3.19 | 1.85 | 4.11 | 0.201 | 2.82  | 0.65  |
| JS060 | 52.14 | 15.33 | 12.06 | 7.36  | 4.03 | 1.77 | 3.87 | 0.196 | 2.66  | 0.592 |
| JS061 | 48.85 | 16.31 | 12.96 | 8.45  | 5.75 | 1.03 | 3.49 | 0.19  | 2.565 | 0.417 |
| JS062 | 53.51 | 13.51 | 13.09 | 7.9   | 4.16 | 1.46 | 3.37 | 0.197 | 2.455 | 0.349 |
| JS063 | 49.33 | 16.05 | 12.81 | 8.28  | 5.89 | 1.05 | 3.44 | 0.194 | 2.544 | 0.419 |
| JS064 | 49.17 | 17.47 | 11.06 | 9.27  | 6.57 | 0.71 | 3.36 | 0.165 | 1.93  | 0.292 |
| JS065 | 54.04 | 15.88 | 10.55 | 6.45  | 3.19 | 2.21 | 4.45 | 0.176 | 2.32  | 0.74  |
| JS066 | 52.46 | 16.08 | 11.08 | 7.83  | 4.8  | 1.49 | 3.46 | 0.174 | 2.245 | 0.388 |
| JS067 | 52.42 | 15.19 | 12.19 | 7.62  | 4.4  | 1.45 | 3.72 | 0.185 | 2.428 | 0.408 |
| JS068 | 49.89 | 18.79 | 10.25 | 9.52  | 5.57 | 0.62 | 3.36 | 0.152 | 1.628 | 0.233 |
| JS069 | 49.96 | 18.04 | 11.37 | 8.56  | 4.2  | 1.04 | 3.75 | 0.175 | 2.509 | 0.397 |
| JS070 | 49.52 | 16.24 | 12.07 | 8.68  | 6.07 | 0.96 | 3.58 | 0.185 | 2.312 | 0.381 |
| JS071 | 54.66 | 15.77 | 10.48 | 5.79  | 2.82 | 2.29 | 4.67 | 0.182 | 2.457 | 0.88  |
| JS072 | 54.41 | 16.26 | 10.86 | 5.91  | 2.36 | 2.27 | 4.46 | 0.169 | 2.363 | 0.8   |
| JS073 | 54.17 | 15.95 | 10.82 | 5.8   | 3.15 | 2.27 | 4.54 | 0.179 | 2.336 | 0.78  |

## SUMMIT SPRINGS SECTION:

| SAMPLE  | SiO[2] | Al[2]O[3] | FeO   | CaO   | MgO  | K[2]O | Na[2]O | MnO   | TiO[2] | P[2]O[5] |       |
|---------|--------|-----------|-------|-------|------|-------|--------|-------|--------|----------|-------|
| CR7-104 | 48.91  | 16.12     | 11.42 |       | 10   | 7.06  | 0.51   | 3.09  | 0.183  | 1.797    | 0.289 |
| CR7-106 | 50.27  | 18.58     | 9.75  | 10.33 | 5.18 | 0.63  | 3.26   | 0.156 | 1.392  | 0.234    |       |
| CR7-107 | 50.69  | 17.52     | 10.45 | 9.24  | 4.57 | 1.04  | 3.43   | 0.167 | 1.731  | 0.369    |       |
| CR7-108 | 49.94  | 16.22     | 11.42 | 10.48 | 5.7  | 0.47  | 3.04   | 0.178 | 2.167  | 0.266    |       |
| CR7-109 | 50.06  | 13.85     | 12.95 | 8.86  | 5.24 | 1.11  | 3.12   | 0.216 | 2.715  | 0.83     |       |
| CR7-110 | 51.92  | 14.63     | 11.23 | 8.92  | 5.38 | 1.12  | 3.42   | 0.171 | 2.026  | 0.354    |       |
| CR7-111 | 47.94  | 16.51     | 9.93  | 9.96  | 9.75 | 0.25  | 2.37   | 0.171 | 0.984  | 0.113    |       |

|         |       |       |       |       |      |      |      |       |       |       |
|---------|-------|-------|-------|-------|------|------|------|-------|-------|-------|
| CR7-112 | 47.55 | 16.48 | 10.29 | 9.9   | 9.51 | 0.23 | 2.28 | 0.181 | 0.979 | 0.115 |
| CR7-113 | 47.36 | 17.33 | 10.62 | 10.47 | 7.82 | 0.2  | 2.39 | 0.194 | 1.007 | 0.12  |
| CR7-114 | 55.66 | 14.16 | 10.31 | 8.18  | 4.56 | 1.37 | 3.36 | 0.255 | 1.458 | 0.239 |
| CR7-115 | 50.63 | 16.5  | 11.1  | 8.58  | 4.1  | 1.26 | 3.37 | 0.158 | 2.667 | 0.388 |
| CR7-116 | 55.92 | 14.09 | 10.5  | 7.47  | 3.88 | 1.79 | 3.26 | 0.18  | 1.98  | 0.312 |
| CR7-117 | 56.02 | 14.36 | 9.67  | 7.88  | 4.1  | 1.58 | 3.45 | 0.232 | 1.992 | 0.352 |
| CR7-118 | 52.68 | 13.39 | 13.71 | 7.43  | 3.65 | 1.56 | 3.68 | 0.205 | 2.53  | 0.408 |
| CR7-119 | 49.82 | 15.82 | 11.63 | 9.67  | 6.05 | 0.68 | 3.17 | 0.177 | 2.181 | 0.373 |
| CR7-120 | 50.69 | 14.2  | 12.34 | 9.92  | 5.62 | 0.7  | 3.14 | 0.185 | 2.347 | 0.312 |
| CR7-121 | 48.82 | 16.38 | 12.29 | 9.1   | 5.8  | 0.85 | 3.21 | 0.173 | 2.335 | 0.322 |
| CR7-122 | 50.38 | 17.2  | 11.12 | 9.02  | 4.39 | 0.97 | 3.43 | 0.155 | 2.264 | 0.325 |

Note: Major- and trace-element analyses are derived from X-ray Fluorescence Spectrometry at the San Diego State University Geoanalytical Lab, except for those analyses comprising the Steens Mountain section which were derived from the same method at Washington State University. These are the raw, non-normalized data, calculated on a volatile-free basis, with all iron expressed as FeO.



## TRACE-ELEMENT ANALYSES OF STRATIGRAPHIC SECTIONS

## ABERT RIM POWERLINE ROAD SECTION:

| SAMPLE   | Sc   | V     | Cr    | Co   | Ni    | Cu    | Zn    | Rb    | Sr   | Y     | Zr   | Nb    | Mo   | Ba  | La    | Ce   | Nd   | Sm   | Yb   | Hf  | Pb  | Th   | U   |      |
|----------|------|-------|-------|------|-------|-------|-------|-------|------|-------|------|-------|------|-----|-------|------|------|------|------|-----|-----|------|-----|------|
| CR6-618  | 30.4 | 356.4 | 43.4  | 36.3 | 37.2  | 67.5  | 265.8 | 110.2 | 20.9 | 467.4 | 41   | 210.9 | 11.5 | 1.6 | 422.9 | 11.5 | 55   | 34.9 | 5.7  | 4.7 | 5.8 | 2.6  | 3.6 | 1.4  |
| CR6-618A | 31.9 | 366.1 | 44.5  | 37.2 | 39.5  | 287.3 | 287.3 | 112.1 | 21   | 458.8 | 43.8 | 221.7 | 11.8 | 1.5 | 422.4 | 18   | 59.4 | 37.4 | 8.8  | 5.7 | 6.6 | 1.9  | 0.7 | 0.8  |
| CR6-618B | 29.7 | 372.5 | 36.9  | 39.2 | 64.3  | 174.1 | 107.7 | 107.7 | 18.9 | 509.8 | 38.6 | 200   | 10.7 | 1.8 | 440.5 | 16.1 | 50.4 | 33.1 | 6.5  | 5.6 | 6.8 | 2    | 1.8 | 1.8  |
| CR6-618C | 34.4 | 416.9 | 44.4  | 41.1 | 67.6  | 241.7 | 124.5 | 124.5 | 19.4 | 444.2 | 43.4 | 220.5 | 12.2 | 1.8 | 474.6 | 17.2 | 61.6 | 36.9 | 10.5 | 5.1 | 5.6 | 4    | 2.2 | 2    |
| CR6-619  | 27.7 | 254.1 | 175.6 | 43.4 | 131.5 | 139.5 | 79.3  | 79.3  | 5.8  | 527   | 22   | 103.7 | 5.7  | 1.6 | 295.4 | 10.4 | 30.1 | 18.5 | 4.6  | 4   | 3.8 | -0.3 | 1.8 | 1.7  |
| CR6-620  | 28.3 | 249.2 | 180.8 | 45.3 | 122.5 | 121.2 | 82.5  | 82.5  | 5.7  | 526.2 | 23.8 | 101.1 | 5.4  | 1.5 | 269.9 | 10.4 | 25.9 | 17.1 | 3.6  | 3.2 | 3.2 | -1.5 | 1.5 | 1.4  |
| CR6-621  | 28.1 | 237.2 | 183.7 | 42.3 | 128.6 | 158   | 79.2  | 79.2  | 5.2  | 536   | 22.1 | 108.6 | 5.5  | 2.2 | 268.3 | 6.8  | 25.6 | 15.8 | 2.8  | 4.5 | 4.2 | -0.1 | 1.9 | 1.7  |
| CR6-622  | 27.7 | 310.9 | 87.5  | 42.8 | 99.9  | 206.5 | 99.6  | 99.6  | 11.9 | 543.8 | 31   | 159.5 | 8.7  | 1.9 | 337.5 | 10.9 | 35.7 | 24.7 | 5.2  | 2.6 | 4.9 | 0.4  | 2.5 | 2.2  |
| CR6-623  | 26.6 | 275.3 | 39.6  | 39.2 | 87.1  | 161.8 | 77    | 77    | 13   | 564.3 | 24.2 | 112.1 | 5.5  | 1.8 | 360.5 | 17   | 29.8 | 19.5 | 1.3  | 3.9 | 3.6 | -1.8 | 1.8 | 1    |
| CR6-624  | 35.1 | 188.2 | 32.6  | 20   | 55.7  | 139.6 | 67.8  | 67.8  | 11.5 | 509.2 | 21.3 | 99    | 5.6  | 3.7 | 191.4 | 5.7  | 20.6 | 13.9 | 4.6  | 3.4 | 4   | -0.5 | 4.4 | 1.7  |
| CR6-625  | 25.4 | 332.5 | 23.6  | 29.6 | 58.6  | 263.5 | 105.9 | 105.9 | 23.3 | 525.7 | 42   | 221.8 | 12.1 | 1.6 | 433.6 | 19.9 | 62.2 | 38.6 | 8.8  | 7.6 | 7.4 | 2.1  | 2.2 | 1.6  |
| CR6-626  | 26.3 | 343.3 | 25    | 27.7 | 57.8  | 280.5 | 106.1 | 106.1 | 20   | 513.5 | 41.5 | 221.1 | 11.8 | 1.6 | 424.9 | 29.2 | 58   | 37.2 | 7.1  | 6.2 | 6.7 | 1.5  | 1.9 | 0.6  |
| CR6-627  | 29.5 | 368   | 30.4  | 32.8 | 62.4  | 315   | 114.9 | 114.9 | 19.4 | 485.5 | 42.6 | 233.5 | 12.6 | 1.8 | 441.1 | 18.9 | 67   | 39.8 | 8.6  | 4.1 | 7   | 2.7  | 1.5 | 1.3  |
| CR6-628  | 28.4 | 381.9 | 32.6  | 36.3 | 62.2  | 305.1 | 114   | 114   | 20.2 | 481.7 | 43.2 | 230.1 | 12.6 | 1.8 | 449.1 | 26   | 60.6 | 36.8 | 10.7 | 5.9 | 6.7 | 3    | 1.8 | 1.9  |
| CR6-629  | 33.5 | 429   | 43.4  | 43.9 | 63.9  | 268   | 122.4 | 122.4 | 22.5 | 457   | 43   | 225.6 | 12.8 | 1.5 | 490.2 | 19.7 | 58.9 | 36.9 | 8.6  | 5.2 | 6.9 | 2.7  | 4.2 | 1.5  |
| CR6-630  | 29   | 383.3 | 47.6  | 35.5 | 68    | 272.4 | 115   | 115   | 20.7 | 462.5 | 41.2 | 215.9 | 11.8 | 1.8 | 438   | 16.6 | 61.4 | 36.5 | 10   | 6.4 | 6   | 3.1  | 2.7 | 1.6  |
| CR6-631  | 31.7 | 337.7 | 45.5  | 35.3 | 70.1  | 303.9 | 114.5 | 114.5 | 21.8 | 459.4 | 42.4 | 225.4 | 11.8 | 1.4 | 470.6 | 14.8 | 57.6 | 36   | 10.9 | 5   | 5.8 | 3    | 0.3 | -0.1 |
| CR6-632  | 25   | 302.4 | 63.6  | 53   | 156.3 | 155.3 | 93.3  | 93.3  | 7.1  | 467.9 | 25.5 | 119.5 | 5.5  | 2   | 366.9 | 10.4 | 20   | 15.8 | 5    | 3.4 | 4.3 | 1.1  | 2.3 | 1.6  |

## ADEL SECTION:

| SAMPLE    | Sc   | V     | Cr    | Co   | Ni    | Cu    | Zn   | Rb   | Sr    | Y     | Zr    | Nb   | Mo   | Ba    | La    | Ce   | Nd   | Sm   | Yb  | Hf  | Pb   | Th   | U    |    |
|-----------|------|-------|-------|------|-------|-------|------|------|-------|-------|-------|------|------|-------|-------|------|------|------|-----|-----|------|------|------|----|
| CR04-553  | 23.3 | 285   | 331.2 | 60   | 189.8 | 76.4  | 79.1 | 7.4  | 469.6 | 19.6  | 97    | 6.2  | -0.2 | 210   | 7.6   | 25   | 14.4 | 2.6  | 4.8 | 5   | -2.4 | 1.5  | 1    |    |
| CR04-554  | 25.8 | 260.7 | 336   | 61.5 | 210.3 | 152.1 | 83   | 4.9  | 385.1 | 20.8  | 98.2  | 6.7  | 0.1  | 171.4 | 3.3   | 28.2 | 15.9 | 4.6  | 5.7 | 4.1 | -2.3 | 0.8  | -0.4 |    |
| CR04-555  | 27.8 | 276   | 382.2 | 64   | 208.6 | 103.5 | 85.6 | 4.1  | 394.9 | 20.1  | 91.7  | 6.8  | 0.2  | 183.1 | 3.7   | 27.2 | 17.2 | 3.7  | 3.5 | 3   | -1.7 | 1.1  | 0.1  |    |
| CR04-556  | 27.1 | 292   | 226.4 | 61.2 | 172.2 | 141.1 | 87.7 | 4.5  | 568.9 | 24.3  | 120.3 | 5.6  | 0.1  | 187.4 | 12.2  | 27.7 | 16   | 4.2  | 5.5 | 4.6 | -3.9 | 3.2  | -0.9 |    |
| CR04-557  | 29.3 | 232.6 | 387   | 72   | 276.9 | 118   | 82   | 4.6  | 310.3 | 21.3  | 91.7  | 5.6  | -0.1 | 139.6 | 6.1   | 25.6 | 15   | 3.3  | 4.6 | 4.3 | -0.6 | 2.3  | -0.5 |    |
| CR04-558  | 33.8 | 269.3 | 326.2 | 58   | 181.5 | 132.7 | 77.3 | 77.3 | 4.5   | 331.3 | 22.3  | 93.6 | 5.7  | 0.1   | 157.6 | 9.5  | 25.3 | 18.3 | 6.9 | 6.3 | 3.1  | -0.9 | 4.4  | -1 |
| CR04-564  | 33.1 | 280   | 273.6 | 49.3 | 109.8 | 165.2 | 79.7 | 6.8  | 358.5 | 24.9  | 103   | 6    | 1.1  | 171.1 | 11.1  | 31.8 | 19.3 | 4.5  | 6.3 | 3.9 | -1.4 | 2.9  | -1.2 |    |
| CR04-565  | 33.6 | 274.6 | 303.4 | 60.9 | 186.5 | 139.2 | 77.7 | 7.3  | 340   | 22.3  | 94.2  | 5.8  | 1.3  | 185.9 | 10.7  | 24.2 | 16.8 | 1.7  | 2.6 | 3.9 | -1.1 | 2.6  | 0.3  |    |
| CR04-5651 | 35.6 | 297   | 278.3 | 55.7 | 145.8 | 135.8 | 78.3 | 5    | 365   | 23.9  | 100.7 | 6    | 0.5  | 182   | 9.5   | 25.4 | 16.7 | 4.1  | 3.6 | 4.3 | -0.7 | 3.6  | -0.5 |    |
| CR04-566  | 28.7 | 293.9 | 131.1 | 57.9 | 157   | 127.5 | 80.9 | 5.6  | 400   | 24.2  | 112.8 | 6.6  | 0.5  | 215.6 | 6.2   | 25.1 | 20.7 | 4.6  | 2.5 | 3.8 | -1   | 3.2  | -0.4 |    |
| CR04-567  | 26.6 | 268.4 | 167.9 | 47.6 | 110.6 | 168.4 | 78.7 | 7.2  | 477.8 | 23.4  | 105   | 6.6  | 0.5  | 281.1 | 15.7  | 29.4 | 17.1 | -2.5 | 3.4 | 4.3 | -2.2 | 3.2  | 0.6  |    |
| CR04-568  | 28.2 | 279.6 | 118.9 | 50.5 | 106.6 | 175.4 | 83.5 | 8.3  | 481.4 | 24.8  | 117.8 | 6.3  | 0.3  | 275.5 | 7.2   | 27.6 | 18.2 | 3.3  | 5   | 4.1 | -2.2 | 3.7  | -0.7 |    |
| CR04-569  | 26.5 | 258   | 227.2 | 55.4 | 163.9 | 93.8  | 72.6 | 8.5  | 349.2 | 22.8  | 93.2  | 4    | 1.2  | 173.4 | -0.8  | 16.9 | 10.5 | 6.5  | 4.7 | 3.8 | -1.6 | 2.1  | -0.3 |    |
| CR04-570  | 27.1 | 240.3 | 191.1 | 53.2 | 141   | 118.2 | 71   | 7.2  | 398.5 | 20.9  | 98.3  | 6.4  | 0.5  | 332.1 | 7.7   | 17.5 | 13.1 | 4.5  | 4.6 | 4.3 | -1.4 | 4.8  | -0.2 |    |
| CR04-571  | 31.3 | 286.2 | 267.7 | 59.7 | 193.9 | 140.7 | 77.5 | 5.7  | 407.6 | 23    | 98.3  | 4.8  | 0.2  | 254   | 5.8   | 24.6 | 17.2 | 4    | 4.7 | 3.7 | -2.1 | 2.6  | -2.1 |    |

## BLACK CANYON RESERVOIR SECTION:

| SAMPLE    | Sc   | V     | Cr    | Co   | Ni    | Cu    | Zn    | Rb    | Sr    | Y     | Zr    | Nb    | Mo   | Ba     | La    | Ce   | Nd   | Sm   | Yb   | Hf   | Pb  | Th   | U   |      |
|-----------|------|-------|-------|------|-------|-------|-------|-------|-------|-------|-------|-------|------|--------|-------|------|------|------|------|------|-----|------|-----|------|
| CR03-475  | 26.3 | 297.8 | 89.1  | 53.1 | 53.1  | 116.1 | 48.4  | 112.1 | 5.8   | 465.3 | 29.1  | 162.1 | 11.6 | 1.8    | 320.2 | 14.6 | 38.4 | 25   | 5.6  | 3.6  | 3.8 | 6.6  | 1.2 | 3.1  |
| CR03-475r | 24.9 | 251.2 | 75.4  | 46.5 | 68.8  | 84.2  | 84.2  | 93.7  | 16.7  | 479.2 | 31.2  | 158.4 | 12.4 | 0.6    | 452.9 | 18.9 | 51.3 | 27   | 4.7  | 1.7  | 3.4 | 5.6  | 3.7 | 2.4  |
| CR03-476  | 25.5 | 293.2 | 81.4  | 53.9 | 122.2 | 45.6  | 45.6  | 113.6 | 7     | 466.1 | 29.5  | 164.7 | 11.8 | 2.1    | 298.4 | 12.3 | 42.3 | 23.7 | 6.5  | 2.2  | 3.7 | 5.5  | 3.3 | 2.6  |
| CR03-477  | 28.7 | 287.1 | 57.2  | 54.9 | 80.6  | 30.3  | 30.3  | 110.9 | 15.9  | 512.6 | 28    | 154.3 | 10.8 | 1.2    | 300.4 | 13.4 | 44.6 | 24.3 | 5.8  | 1    | 2.8 | 3.5  | 3   | 1.9  |
| CR03-478  | 24.8 | 250.2 | 49.4  | 53.8 | 105.7 | 44    | 44    | 107.6 | 11.6  | 501.1 | 28.5  | 151.7 | 10.8 | 1      | 228.5 | 10.4 | 41.7 | 22.8 | 6    | -0.5 | 2.3 | 3.4  | 3   | 1.8  |
| CR03-479  | 22.8 | 265.4 | 51    | 54.6 | 107.6 | 42.9  | 42.9  | 111.1 | 11.7  | 459.1 | 27.9  | 145.9 | 10.7 | 2.1    | 230.5 | 14.4 | 39.4 | 21.4 | 3.9  | 1.4  | 2.3 | 5.8  | 2   | 2.5  |
| CR03-480  | 28   | 272.7 | 68.2  | 50.3 | 91.6  | 126.6 | 87.7  | 87.7  | 12.9  | 404.3 | 27.7  | 142.8 | 11   | 0.7    | 374.1 | 11.8 | 34.2 | 20   | 4.1  | 2.7  | 3.2 | 5    | 3.8 | 2.3  |
| CR03-481  | 30.1 | 284.8 | 69.2  | 52.4 | 101.9 | 123   | 91.5  | 91.5  | 6.8   | 432.4 | 28.3  | 144.7 | 11   | 1.5    | 387.3 | 17.2 | 39.1 | 20.7 | 2.7  | 2.4  | 3.1 | 7.1  | 3.1 | 3.5  |
| CR03-482  | 33.2 | 332.6 | 177.3 | 52.7 | 119.3 | 127.7 | 127.7 | 97.2  | 4.3   | 447.5 | 28.7  | 129.7 | 8.5  | 0.5    | 284.8 | 12   | 30.1 | 19.1 | 5.1  | 1.4  | 2.5 | 3.8  | 1.5 | 1.7  |
| CR03-483  | 32.9 | 282.9 | 164.8 | 51.4 | 121.1 | 97    | 92.6  | 92.6  | 8.1   | 403.4 | 27.8  | 123.2 | 7.9  | 1.7    | 247.5 | 18.1 | 31.7 | 18.7 | 2.9  | 3    | 1.7 | 6.5  | 1.1 | 3.5  |
| CR03-484  | 30.9 | 301   | 180.5 | 54.7 | 116.8 | 125.3 | 95.1  | 95.1  | 11.2  | 478.7 | 28.2  | 127.5 | 8.5  | 0.5    | 610.8 | 8    | 29.6 | 17.8 | 3.8  | 1.8  | 3.3 | 1.6  | 4.6 | -0.1 |
| CR03-485  | 22.4 | 263.3 | 28    | 50.7 | 111.7 | 80.1  | 80.1  | 114.6 | 23.4  | 479.9 | 35.8  | 237.5 | 16.9 | 0.9    | 370.3 | 24   | 59.9 | 35.6 | 10.4 | 1.2  | 4.4 | 4.7  | 3.1 | 0.4  |
| CR03-486  | 19.2 | 250.5 | 15.8  | 51.2 | 90.1  | 87.5  | 87.5  | 105.9 | 10.1  | 540.1 | 35.1  | 222.3 | 15.6 | 0.7    | 396.7 | 15.6 | 59.4 | 38.1 | 6.4  | 2    | 6.6 | 2.7  | 3.5 | 0.4  |
| CR03-487  | 21.4 | 215.3 | 62.9  | 39.7 | 78.8  | 77.3  | 77.3  | 61.5  | 4     | 506.6 | 21.7  | 112   | 7.8  | 0.5    | 243.1 | 6.9  | 25.5 | 15.3 | 3.9  | 2.7  | 3.4 | 2.4  | 5.4 | 1.9  |
| CR03-488  | 23.7 | 247.2 | 26.4  | 48.2 | 88.5  | 86.3  | 86.3  | 86    | 14.3  | 566.9 | 27    | 138.4 | 7.8  | -0.1   | 804.7 | 14.3 | 32.5 | 19.8 | 4.8  | 0.5  | 3.7 | 2.6  | 3.4 | 0.5  |
| CR03-489  | 24.7 | 244.3 | 39.2  | 48.1 | 85.2  | 126.3 | 92.8  | 92.8  | 7.8   | 443.8 | 27.2  | 137.4 | 8.6  | 1      | 297.8 | 11.3 | 27.9 | 18.3 | 4    | 2.4  | 2.9 | 3.7  | 3.5 | 1.3  |
| CR03-490  | 22.6 | 206   | 51.5  | 41   | 75.2  | 92.8  | 92.8  | 67.7  | 1.7   | 492   | 23.7  | 119.9 | 7.4  | 0.3    | 262.5 | 12.6 | 33.1 | 19   | 0.6  | 0.9  | 3.4 | 2.5  | 3.5 | 1.3  |
| CR03-491  | 26.4 | 248.7 | 44.7  | 40.3 | 56    | 123.9 | 88.1  | 88.1  | 34.7  | 516   | 33.3  | 180.8 | 14.9 | 0.8    | 544.9 | 22   | 54.4 | 30.3 | 5.2  | 1.4  | 4.5 | 5.4  | 4.5 | 1.1  |
| CR03-492  | 29.6 | 268.5 | 70.6  | 44.2 | 67.4  | 104.1 | 98.8  | 98.8  | 5.3   | 531.9 | 30.8  | 157.4 | 11.7 | -0.1   | 454   | 18.5 | 50.2 | 26.9 | 6.8  | 2.1  | 4.8 | 3.5  | 3.7 | 0.2  |
| CR03-493  | 27.1 | 235.7 | 86.6  | 45   | 82    | 96.9  | 89.2  | 89.2  | 10.5  | 487.3 | 28.8  | 142.1 | 10.8 | 0.8    | 379   | 22.3 | 46.4 | 25.6 | 7    | 1.6  | 3.4 | 3.3  | 2.9 | -0.1 |
| CR03-494  | 27.2 | 275.4 | 69.8  | 59.4 | 158.1 | 55.7  | 108.7 | 12.2  | 477.8 | 27.5  | 146.5 | 10.4  | 1.1  | 249.2  | 15.5  | 33.4 | 20.5 | 3.7  | -0.4 | 3.5  | 2.9 | 2.6  | 0.1 |      |
| CR03-495  | 29.6 | 338.9 | 203.6 | 62   | 139.4 | 158.4 | 106.8 | 6.2   | 372.1 | 30.2  | 138   | 8     | 1.4  | 351    | 9.7   | 33.8 | 21.6 | 4.3  | 1.2  | 2.5  | 6   | 2.2  | 0.9 |      |
| CR03-496  | 35.7 | 370.7 | 202.1 | 58.5 | 131.1 | 181.9 | 113.2 | 6.9   | 417.7 | 33.3  | 152.7 | 8.3   | 1.3  | 265.3  | 13.1  | 35.1 | 22.6 | 4.8  | 0.7  | 3.7  | 7.4 | -0.6 | 3.8 |      |
| CR03-497  | 34.9 | 348   | 180.1 | 53.7 | 117.8 | 208.5 | 112.8 | 6.3   | 409.5 | 33.8  | 155.3 | 8.4   | 1.2  | 215.4  | 11.4  | 36.1 | 25.3 | 6.5  | 2    | 3.1  | 6.5 | 0.2  | 4.1 |      |
| CR03-498  | 30   | 290   | 167.9 | 53.4 | 133.5 | 169.3 | 108   | 4.1   | 403.6 | 33.2  | 150.2 | 8.4   | 1    | 192.8  | 11.5  | 36.3 | 21.2 | 3.7  | 3    | 3.1  | 6   | 0.6  | 2.6 |      |
| CR03-499  | 29.6 | 308.5 | 186.2 | 58.3 | 147.3 | 188   | 102.3 | 5.8   | 395.1 | 29.7  | 133.8 | 7.5   | 1.4  | 279.4  | 8     | 29.9 | 18.8 | 5.9  | 3.6  | 2.3  | 5.8 | 0.8  | 2.4 |      |
| CR03-500  | 24.6 | 268.5 | 191.1 | 58.9 | 153.6 | 93.2  | 92.4  | 25.8  | 406.8 | 29.4  | 130.9 | 7.1   | 0.9  | 2229.1 | 8.3   | 24.5 | 14.2 | 2.1  | 1    | 2    | 5.3 | 0    | 2.1 |      |
| CR03-501  | 36.1 | 362.7 | 205.7 | 62.3 | 136.9 | 232.7 | 113.8 | 7.4   | 412.9 | 30.2  | 134.1 | 7.1   | 1    | 336    | 10    | 38.3 | 20.2 | 6.2  | 1.9  | 1.3  | 6.7 | 0.6  | 3.4 |      |



## CATLOW PEAK SECTION:

| SAMPLE     | Sc   | V      | Cr     | Co   | Ni     | Cu    | Zn    | Rb    | Sr    | Y     | Zr    | Nb      | Mo     | Ba     | La   | Ce   | Nd   | Sm   | Yb   | Hf  | Pb    | Th   | U    |
|------------|------|--------|--------|------|--------|-------|-------|-------|-------|-------|-------|---------|--------|--------|------|------|------|------|------|-----|-------|------|------|
| CR03-502   | 26.1 | 279.5  | 72.6   | 51.6 | 147.8  | 52.5  | 107.4 | 10.7  | 505   | 27.7  | 153.7 | 11.2    | 1.6    | 309.6  | 14.1 | 89.4 | 20.1 | 46.3 | 12.1 | 0.6 | 17.1  | 29   | 32.5 |
| CR03-503   | 33   | 337.4  | 192.6  | 55.9 | 136.9  | 190   | 110.1 | 7.7   | 428.9 | 32.6  | 148.8 | 8.1     | 1.4    | 269    | 15.5 | 64.3 | 24.7 | 24.7 | 7.5  | 3.2 | 2.9   | 6.5  | 2.1  |
| CR03-504   | 34.5 | 342    | 32.3   | 44   | 66.1   | 83.2  | 99.1  | 10.5  | 472.8 | 33.9  | 159.4 | 9.2     | 0.6    | 366.7  | 12.5 | 39.7 | 23.4 | 23.4 | 3.5  | 2.2 | 2.6   | 5.5  | 1.9  |
| CR03-505   | 25.7 | 308    | 53.8   | 47.4 | 98.8   | 115.1 | 97    | 10    | 445.7 | 33.6  | 152.3 | 9.2     | 1.7    | 359.3  | 16.3 | 38.9 | 24.9 | 24.9 | 5.7  | 2.7 | 3.7   | 6.4  | 1.5  |
| CR03-506   | 27.4 | 315.9  | 37.7   | 43.2 | 55.1   | 140.1 | 86.1  | 13.1  | 455.1 | 37    | 186.3 | 12.2    | 0.8    | 477.4  | 21.6 | 53.1 | 32.1 | 32.1 | 8.1  | 2   | 3.4   | 4.6  | 2.5  |
| CR03-507   | 34.9 | 324.8  | 17.2   | 34.6 | 34.5   | 149.5 | 95.3  | 37.5  | 463.3 | 40    | 204.3 | 12.8    | 0.3    | 525.5  | 24.7 | 53.1 | 32.3 | 32.3 | 6.7  | 3   | 4     | 6.6  | 3    |
| CR03-508   | 27.4 | 288    | 20.2   | 39.6 | 41.1   | 118.4 | 90    | 12.7  | 519.2 | 33.7  | 170.2 | 9.3     | 0.4    | 473.1  | 14.7 | 40.8 | 22.7 | 22.7 | 6.7  | 4.1 | 5.4   | 5.4  | 3.3  |
| CR03-509   | 37.9 | 446    | -16.1  | 43.3 | 45     | 199.3 | 142.4 | 8.5   | 484.4 | 47    | 255.7 | 17.3    | -0.2   | 575.4  | 22.3 | 67.3 | 42.7 | 42.7 | 9.4  | 4.4 | 5.8   | 5.5  | 3.2  |
| CP-01      | <LL  | 2.4<LL | 9.8    | 7.7  | 1.2<LL | 8     | 15.1  | 115.5 | 78.1  | 414.1 | 31.9  | 643.5   | 35.1   | 1.5    | 31.2 | 27.1 | 89.4 | 20.1 | 12.1 | 0.6 | 17.1  | 29   | 32.5 |
| CP-02      | 19.3 | 67.2   | 12.8   | 33   | 122.2  | 170.4 | 109   | 13.7  | 498   | 28.6  | 168.8 | 16.4    | 1.3    | 2214.7 | 44.5 | 64.3 | 46.3 | 46.3 | 0.8  | 4.4 | 7.6   | 18.3 | 15.8 |
| CP-03      | 27.4 | 346.9  | 71.9   | 60.1 | 122.2  | 170.4 | 109   | 13.7  | 498   | 28.6  | 168.8 | 16.4    | 1.3    | 2214.7 | 44.5 | 64.3 | 46.3 | 46.3 | 0.8  | 4.4 | 7.6   | 18.3 | 15.8 |
| CP-04      | 28.2 | 250    | 1.1<LL | 38.1 | 10     | 82.8  | 124.9 | 58.7  | 461.5 | 28.4  | 161.1 | 16.1    | <LL    | 802.3  | 39.1 | 50.8 | 42.5 | 42.5 | <LL  | <LL | 6.2   | 18.9 | 6.9  |
| CP-05      | 18.1 | 212.3  | 32.8   | 38.3 | 64     | 110.8 | 88.7  | 59.4  | 461.6 | 26.3  | 175.9 | 10      | 1.2    | 700.7  | 20.7 | 34.3 | 15.8 | 15.8 | 7.2  | 4.4 | 8.2   | 15   | 10.4 |
| CP-06      | 25.9 | 303    | 73.7   | 49.1 | 82.1   | 174.2 | 98.1  | 27    | 471.2 | 31.2  | 178.4 | 9.6     | <LL    | 485.3  | 19.5 | 33.8 | 19.4 | 19.4 | <LL  | <LL | 8.4   | 11.7 | 8    |
| CP-07      | 22.4 | 254.3  | 127.7  | 45.8 | 114.8  | 176.4 | 94.6  | 30.3  | 466.2 | 30.3  | 177.9 | 10.6    | 0.2<LL | 485.3  | 25.7 | 39.6 | 17.3 | 17.3 | <LL  | <LL | 8.2   | 13.1 | 10.7 |
| CP-08      | 24.5 | 280.6  | 155.5  | 51.3 | 126.2  | 210.8 | 102.9 | 33.2  | 417.6 | 31.9  | 187.6 | 11.6    | 0.1<LL | 528.2  | 24.2 | 41.5 | 18.4 | 18.4 | <LL  | <LL | 7.9   | 14.3 | 12.9 |
| CP-09      | 22   | 286.7  | 65.4   | 46.5 | 79.1   | 156.6 | 97.5  | 46.2  | 428.4 | 31.2  | 189.9 | 10.4    | 0.1<LL | 605.1  | 21.4 | 38.9 | 23.5 | 23.5 | 6.4  | 4.4 | 8     | 13.4 | 8.5  |
| CP-10      | 24.2 | 257    | 69     | 39.6 | 96     | 115.4 | 86.4  | 13.9  | 554.1 | 27.9  | 152   | 9.0<LL  | 459.2  | 21     | 35.6 | 15.9 | 15.9 | 15.9 | <LL  | <LL | 7.1   | 11.9 | 9.8  |
| CP-11      | 24.5 | 271    | 71.7   | 33.8 | 63.9   | 173.2 | 91.4  | 32.4  | 464.9 | 31.1  | 179.7 | 10.4<LL | 459.2  | 21     | 35.6 | 15.9 | 15.9 | 15.9 | <LL  | <LL | 7.1   | 11.9 | 9.8  |
| CP-11(JAI) | 24.9 | 275.7  | 82.3   | 42.4 | 68.4   | 183.1 | 87.5  | 31.3  | 464   | 31.3  | 182.6 | 9.4     | 0.1<LL | 475.1  | 22.5 | 50.6 | 28.1 | 28.1 | <LL  | <LL | 7.2   | 12.9 | 9.2  |
| CP-12      | 25.6 | 275.1  | 88.9   | 36.6 | 63.4   | 191.4 | 92.3  | 34.4  | 451.9 | 33.2  | 187.5 | 10.7    | 0.5    | 482.8  | 19.6 | 42.3 | 18.5 | 18.5 | 5.9  | 4.4 | 7.7   | 14   | 12.8 |
| CP-13      | 28.4 | 314.4  | 82.3   | 50.8 | 68.7   | 191.1 | 103.1 | 34.5  | 439.9 | 34    | 193.9 | 11      | 1.3    | 537.5  | 25.6 | 49.3 | 25.7 | 25.7 | 10.8 | 4.4 | 3.5   | 10.7 | 9.7  |
| CP-13A     | 28.1 | 289.9  | 168.9  | 67.9 | 149.9  | 161.3 | 86    | 5.8   | 525.5 | 24.1  | 120.2 | 7       | <LL    | 256    | 16.4 | 23.3 | 10.3 | 10.3 | <LL  | <LL | 5.4   | 10.3 | 8.3  |
| CP-14      | 26.2 | 300.8  | 146.7  | 56   | 112.9  | 127.7 | 107.4 | 34.5  | 422.8 | 32.7  | 192.3 | 11.9    | 0.5    | 526.4  | 26.2 | 42   | 21.4 | 21.4 | <LL  | <LL | 7.7   | 14   | 12.8 |
| CP-14A     | 21.5 | 221.5  | 23.2   | 37.5 | 72.4   | 124.1 | 71.4  | 2.5   | 636.6 | 20.5  | 107.9 | 5.8     | <LL    | 260.2  | 10.1 | 21.8 | 18.5 | 18.5 | <LL  | <LL | 6.5   | 10.6 | 8.6  |
| CP-14AA    | 22.6 | 272.1  | 128.2  | 51.6 | 102.7  | 171.6 | 97.3  | 32.1  | 430.7 | 33.6  | 192.7 | 11.8    | 0.1<LL | 501.3  | 21   | 42.2 | 18.5 | 18.5 | <LL  | <LL | 8.6   | 13.8 | 12.2 |
| CP-15      | 22.7 | 233.8  | 29     | 33.5 | 77     | 130.2 | 72.8  | 6.9   | 597.8 | 21.2  | 114   | 6.4     | <LL    | 219.5  | 15   | 30.6 | 8.5  | 8.5  | <LL  | <LL | 4     | 10.8 | 9.3  |
| CP-15A     | 27.5 | 291.8  | 30.1   | 54.2 | 78.7   | 164.1 | 88.6  | 4.7   | 561.6 | 23.6  | 123.6 | 7.5     | 0.4<LL | 262.8  | 17.4 | 34.3 | 14.6 | 14.6 | 5.9  | 4.4 | 16<LL | 8.9  | 7.9  |
| CP-16      | 21.3 | 249.6  | 27.9   | 60.8 | 77.9   | 159.5 | 76.7  | 4.3   | 598.9 | 22.8  | 114.3 | 6.3     | <LL    | 250.5  | 14.6 | 20.5 | 5.4  | 5.4  | 6.3  | 4.4 | 6.7   | 10.6 | 9.9  |
| CP-17      | 24.3 | 255.5  | 34.4   | 46   | 80.2   | 155.3 | 82.6  | 5     | 598.5 | 23.1  | 118.9 | 6.7     | <LL    | 250.6  | 14.7 | 21.3 | 14.8 | 14.8 | <LL  | <LL | 6.9   | 10.8 | 9.3  |
| CP-18      | 28.8 | 301.5  | 43.4   | 52.8 | 100.9  | 133   | 98    | 9.3   | 494.7 | 26.7  | 132.3 | 7.6     | <LL    | 272.9  | 19.3 | 35.5 | 16.8 | 16.8 | <LL  | <LL | 8     | 13.1 | 11.9 |
| CP-19      | 29.7 | 346    | 84.8   | 49.5 | 93.6   | 152   | 102.9 | 16.6  | 503.3 | 33    | 166.1 | 10.1    | 0.4<LL | 396.2  | 16.5 | 37.1 | 18.8 | 18.8 | <LL  | <LL | 6.3   | 11.9 | 12   |
| CP-20      | 24.7 | 323.5  | 34.8   | 32.9 | 53.8   | 204.4 | 90.5  | 11.3  | 653   | 30.2  | 166.9 | 10.2    | <LL    | 368.3  | 19.4 | 33.5 | 22.2 | 22.2 | <LL  | <LL | 6.8   | 10.7 | 8.7  |
| CP-20(JAI) | 24.2 | 302.2  | 37.7   | 41.6 | 57.8   | 180.1 | 82.6  | 10    | 681.2 | 27.2  | 155   | 8.6     | <LL    | 383.2  | 18.6 | 35   | 17   | 17   | <LL  | <LL | 11.2  | 12.2 | 2.1  |
| CP-21      | 25   | 315.8  | 43.5   | 31.1 | 63.2   | 178.9 | 88    | 9.9   | 667.6 | 29.6  | 163.1 | 9.6     | <LL    | 391.1  | 15.9 | 35.5 | 18.1 | 18.1 | 5.3  | 4.4 | 10.2  | 13   | 13.5 |
| CP-22      | 25.1 | 327.2  | 39.7   | 34.4 | 65     | 199.5 | 88.5  | 9.5   | 655.7 | 29.6  | 166.1 | 10.2    | <LL    | 510.8  | 25.2 | 40   | 27.8 | 27.8 | 10.6 | 4.4 | 10.2  | 13   | 13.5 |
| CP-23      | 28.1 | 430.6  | 31.7   | 36.5 | 59.5   | 249.7 | 114.8 | 18    | 525.7 | 39.1  | 222.5 | 14.4    | 0.1<LL | 493    | 27.6 | 50   | 24.9 | 24.9 | 7    | 4.4 | 10.3  | 12.9 | 13.4 |
| CP-24      | 27.6 | 387    | 27.2   | 30.2 | 55     | 245.2 | 107.1 | 20.9  | 547.3 | 39.3  | 218.1 | 13.6    | <LL    | 482.7  | 24.5 | 49.7 | 26.4 | 26.4 | 7.6  | 4.4 | 11.2  | 12.2 | 2.1  |
| CP-25      | 28.4 | 413.8  | 26.2   | 34.1 | 57.1   | 287.6 | 110.7 | 20.3  | 531.8 | 40.2  | 222.8 | 14      | <LL    | 437.1  | 22.4 | 35.5 | 20.7 | 20.7 | 6    | 4.4 | 12.3  | 12.3 | 1.9  |
| CP-26      | 24.9 | 328.3  | 26.4   | 34.9 | 54.3   | 267.9 | 95.9  | 15.2  | 630   | 33.2  | 189   | 11.7    | <LL    | 604.4  | 30.8 | 56.9 | 29.5 | 29.5 | <LL  | <LL | 12    | 12.5 | 13.4 |
| CP-27      | 31.9 | 483.3  | 35     | 55.2 | 62.9   | 241.4 | 128   | 24.6  | 509.2 | 40    | 231.2 | 14.9    | 0.5    | 463.3  | 22.4 | 39.5 | 16.1 | 16.1 | 6.4  | 4.4 | 10.2  | 13   | 13.5 |
| CP-28      | 25.4 | 334.6  | 31.3   | 29.3 | 57     | 227.7 | 96.5  | 14.3  | 623   | 35.4  | 196   | 12.2    | 0.1<LL | 483.9  | 26   | 41.9 | 28.3 | 28.3 | 11.7 | 4.4 | 10.2  | 13   | 13.5 |
| CP-29      | 31.9 | 450.9  | 29.1   | 51.7 | 54.1   | 201.8 | 123.1 | 16.2  | 549.9 | 39.8  | 220.5 | 14.1    | 0.5<LL | 561.9  | 26   | 41.9 | 28.3 | 28.3 | 11.7 | 4.4 | 10.2  | 13   | 13.5 |
| CP-30      | 30.9 | 457.8  | 30.9   | 50.8 | 59.3   | 260.7 | 126.4 | 25.4  | 519.3 | 40.1  | 228.5 | 15.1    | 0.5    | 537.9  | 30.9 | 58   | 30.8 | 30.8 | 7    | 4.4 | 10.5  | 12.8 | 13.3 |
| CP-31      | 31.5 | 439.1  | 35.1   | 49.5 | 59.1   | 266.8 | 123.7 | 25.7  | 534.4 | 39.5  | 216.4 | 14.3    | 0.5<LL | 513.3  | 27.9 | 50.2 | 29.3 | 29.3 | 8.4  | 4.4 | 10.7  | 13.2 | 13.3 |
| CP-32      | 32.1 | 325    | 157.9  | 57.1 | 155.7  | 188.8 | 87.6  | 2.4   | 419.2 | 25.9  | 107.8 | 6.2     | <LL    | 156.1  | 9.5  | 16.6 | 50.4 | 50.4 | <LL  | <LL | 4.7   | 10.3 | 7.7  |
| CP-33      | 34.3 | 322.6  | 158.3  | 59.6 | 162.9  | 133.5 | 90.7  | 5.5   | 412   | 25.9  | 112.9 | 5.7     | 0.1<LL | 170.3  | 12.9 | 10.5 | 21.3 | 21.3 | <LL  | <LL | 5.1   | 9.5  | 6.6  |
| CP-34      | 29.1 | 283.5  | 127.5  | 47.4 | 147.7  | 146.1 | 86.4  | 6.1   | 419   | 25.7  | 113.5 | 5.7     | <LL    | 148.7  | 10.5 | 26.1 | 6    | 6    | <LL  | <LL | 4.5   | 9.7  | 6.6  |
| CP-35      | 34.3 | 323.7  | 135.2  | 65   | 155.8  | 148.8 | 94.3  | 4.3   | 411   | 26.4  | 115.8 | 6.2     | <LL    | 187.2  | 17.3 | 26   | 8.9  | 8.9  | <LL  | <LL | 3.9   | 9.4  | 5.8  |
| CP-36      | 35.8 | 330.9  | 110.1  | 66.5 | 160.4  | 147.3 | 93.7  | 7.7   | 354.8 | 26.4  | 117.7 | 7.9     | <LL    | 168.2  | 14.4 | 36.4 | 14.4 | 14.4 | <LL  | <LL | 7.2   | 10.2 | 7.4  |
| CP-38      | 34.3 | 331.2  | 112.5  | 65   | 154.4  | 131.2 | 93.8  | 8.7   | 363.7 | 26.9  | 122   | 7.6     | 0.0<LL | 186.1  | 17.3 | 21.5 | 13.3 | 13.3 | <LL  | <LL | 4.2   | 9.6  | 6.2  |
| CP-39      | 33.6 | 317.7  | 103.7  | 64.3 | 160.5  | 157.8 | 92.6  | 7.6   | 350.8 | 27    | 120.5 | 7.1     | <LL    | 158.7  | 13.6 | 27.3 | 9.1  | 9.1  | <LL  | <LL | 4.2   | 9.6  | 6.2  |
| CP-39(JAI) | 34.6 | 322.9  | 105.3  | 71.7 | 154.5  | 129.7 | 90.9  | 7.3   | 350.2 | 26    | 120.4 | 7.3     | <LL    | 151.7  | 15.2 | 32.6 | 14.6 | 14.6 | <LL  | <LL | 5.8   | 9.1  | 3.8  |
| CP-40      | 32.2 | 311    | 188.2  | 62.8 | 131.8  | 176.4 | 93.5  | 12.2  | 348.3 | 32.9  | 156.5 | 10.2    | <LL    | 187.9  | 16.8 | 32.7 | 12.6 | 12.6 | <LL  | <LL | 6.7   | 11.4 | 8    |
| CP-41      | 35.1 | 346.5  | 216.9  | 65.7 | 147.7  | 147.9 | 99.8  | 14.1  | 341.4 | 31.1  | 149.5 | 9.5     | 0.2<LL | 242.1  | 20.5 | 33.7 | 12.7 | 12.7 | <LL  | <LL | 5.8   | 9.7  | 5.9  |
| CP-42      | 32   | 457.4  | 36.6   | 66   | 63.6</ |       |       |       |       |       |       |         |        |        |      |      |      |      |      |     |       |      |      |

|       |      |        |       |             |       |       |       |       |       |       |       |            |       |      |       |             |        |        |      |      |     |
|-------|------|--------|-------|-------------|-------|-------|-------|-------|-------|-------|-------|------------|-------|------|-------|-------------|--------|--------|------|------|-----|
| CP-60 | 22.6 | 227.8  | 61.8  | 38.5        | 66.7  | 151.8 | 74.2  | 17.9  | 553.2 | 26.8  | 149.3 | 8.0<LL     | 306.6 | 17.2 | 34.1  | 13.6 0.4<LL | <LL    | 4.2    | 9.6  | 8.1  | 2.5 |
| CP-61 | 25.9 | 309.2  | 116.6 | 52.1        | 109.5 | 153.9 | 84.5  | 7.2   | 498.6 | 23.8  | 134.5 | 9.8 0.4<LL | 221.4 | 19.6 | 29.2  | 11.5 4.8<LL | <LL    | 2.1<LL | 8.2  | 7.7  | 1.1 |
| CP-62 | 28.5 | 250.8  | 264.1 | 57.7        | 131.8 | 104.2 | 76.2  | 13.1  | 512.7 | 20.8  | 107.5 | 6.4 0.3<LL | 321.8 | 13.7 | 34.2  | 10.7 4.3<LL | <LL    | 1.3<LL | 8.8  | 6.1  | 1.6 |
| CP-63 | 27.9 | 263.3  | 188.7 | 44.7        | 112.8 | 112.2 | 80.5  | 15.8  | 509.2 | 23    | 122.6 | 8.0<LL     | 344.5 | 12.1 | 35.9  | 10.7        | 5.1<LL | 1.8<LL | 9    | 6.9  | 1.2 |
| CP-64 | 30.5 | 308.6  | 182.2 | 54.9        | 77.6  | 147.2 | 89.9  | 16    | 508.9 | 27.2  | 140   | 8.9<LL     | 430.3 | 19.3 | 40.8  | 17          | 5.4<LL | 1.0<LL | 9.1  | 8.8  | 1.4 |
| CP-65 | 32.6 | 302.2  | 220.7 | 60.9        | 119.8 | 119.9 | 92.2  | 16.1  | 500.1 | 22.5  | 124   | 7.7 0.2<LL | 360.9 | 18.4 | 27    | 10.2        | 9.8<LL | 0.7<LL | 9.5  | 6.1  | 2.3 |
| CP-66 | 6<LL |        | 4.9   | 25.3 2.0<LL |       | 9.8   | 141.9 | 160.8 | 35.2  | 108.5 | 350.3 | 19.6       | 79.7  | 86.6 | 105.3 | 79.2        | 23.7   | 5.6    | 20.9 | 19.5 | 8.4 |
| CP-67 | <LL  | 5.2<LL | 4.8   | 11.1<LL     |       | 5.3   | 150.7 | 126.7 | 17    | 39.2  | 466.4 | 23.6       | 57.4  | 46.1 | 105   | 50          | 22.6   | 2      | 10.1 | 22.7 | 3.6 |

## COTTONWOOD CREEK SECTION:

|          |      |       |       |    |      |       |      |       |      |       |      |       |      |     |        |      |      |      |     |      |     |     |     |
|----------|------|-------|-------|----|------|-------|------|-------|------|-------|------|-------|------|-----|--------|------|------|------|-----|------|-----|-----|-----|
| SAMPLE   | Sc   | V     | Cr    | Co | Ni   | Cu    | Zn   | Rb    | Sr   | Y     | Zr   | Nb    | Mo   | Ba  | La     | Ce   | Nd   | Sm   | Yb  | Hf   | Pb  | Th  | U   |
| CR03-443 | 26.5 | 303.3 | 18.2  |    | 55   | 24.9  | 44.1 | 150.9 | 39.4 | 514   | 41.3 | 266.3 | 15.5 | 1.6 | 1039.4 | 35.5 | 88.7 | 44.3 | 8   | 1.9  | 5.5 | 8.5 | 4.5 |
| CR03-444 | 27.8 | 259.3 | 186.1 |    | 61.7 | 116   | 36   | 101.9 | 6.5  | 451.6 | 25.4 | 135.2 | 10.6 | 1.3 | 180.5  | 13.3 | 39.4 | 21.3 | 3.9 | 0.3  | 3.7 | 3.5 | 2.2 |
| CR03-445 | 22.6 | 248   | 116.1 |    | 55.5 | 123.8 | 44.8 | 103.1 | 5.2  | 488.8 | 25.3 | 128.8 | 10.5 | 1.1 | 158.4  | 12.4 | 38   | 20.2 | 4   | -0.8 | 2.1 | 2.4 | 2.2 |
| CR03-446 | 24.8 | 245.9 | 107.3 |    | 54.3 | 115.4 | 43.9 | 106.1 | 4.4  | 539.5 | 25.1 | 131.4 | 10.9 | 0.9 | 179.4  | 5    | 34.9 | 21.4 | 5.4 | 0.8  | 3.1 | 2   | 2   |
| CR03-447 | 20.6 | 288.2 | 77.3  |    | 49.4 | 93.3  | 78   | 124   | 28.8 | 560.1 | 37.7 | 246.3 | 18.3 | 0.6 | 627.4  | 23.6 | 77.3 | 42.5 | 8.9 | 1.2  | 4.8 | 4.8 | 3.6 |
| CR03-448 | 25   | 257.3 | 157.4 |    | 60.5 | 142.3 | 62.8 | 106   | 9    | 497.2 | 26   | 141.8 | 9.5  | 0.5 | 265.8  | 7.6  | 38.6 | 23   | 7   | 1.2  | 3.1 | 2.6 | 2.6 |
| CR03-449 | 20.8 | 258.9 | 86.7  |    | 52.3 | 90.1  | 57.7 | 112.9 | 15.3 | 553.3 | 30.2 | 183.6 | 12.4 | 1   | 394.2  | 15.1 | 51.6 | 31.2 | 5.2 | 2.7  | 4.1 | 4.3 | 1.9 |
| CR03-450 | 23.1 | 277   | 59    |    | 57.2 | 69.5  | 63.1 | 122.9 | 15.9 | 557.9 | 30.9 | 186.8 | 12.7 | 0.9 | 418.6  | 15.1 | 53.1 | 29.4 | 7.8 | 2.7  | 4.3 | 3.7 | 1.1 |
| CR03-451 | 25   | 251.9 | 108.3 |    | 49.2 | 100.4 | 73.5 | 118.6 | 19.1 | 466.9 | 32.1 | 189.1 | 12.3 | 1.1 | 350    | 27.5 | 50.2 | 27.4 | 4.7 | 2.3  | 3.8 | 4.4 | 2.3 |
| CR03-452 | 25.3 | 265.8 | 129.7 |    | 56.2 | 139.6 | 59.6 | 106.5 | 66.6 | 608.8 | 28.3 | 144.7 | 10   | 0.2 | 2653.7 | 13   | 25   | 15.1 | 3.6 | 2.1  | 3.4 | 1.9 | 2.2 |
| CR03-453 | 26.3 | 259.4 | 116.2 |    | 56.2 | 171.5 | 83.6 | 114.3 | 13.5 | 444.9 | 29.4 | 158.8 | 9.9  | 1.9 | 222.7  | 14.6 | 47.4 | 24.7 | 5.9 | 2.8  | 3.2 | 6.2 | 1.5 |
| CR03-454 | 23.5 | 251   | 64.5  |    | 46.6 | 93.1  | 90.2 | 117.5 | 19.7 | 469.3 | 33.4 | 201.2 | 14.5 | 1   | 341.7  | 22.7 | 54.1 | 32   | 6.4 | 1    | 4.4 | 4.5 | 2.1 |
| CR03-455 | 23.1 | 239.9 | 55.9  |    | 43.4 | 46.5  | 38.6 | 120.7 | 31.5 | 467.2 | 34.1 | 222.3 | 14.9 | 1.4 | 555.8  | 24.9 | 61.5 | 32.6 | 6.9 | 3.1  | 4.9 | 7.3 | 3.1 |
| CR03-456 | 28.5 | 291.9 | 94.9  |    | 58   | 67.7  | 47.4 | 117.5 | 18.9 | 470.3 | 29.2 | 163.1 | 11   | 1.7 | 368    | 13.2 | 40.1 | 22.9 | 5.7 | 1.4  | 4.4 | 4.1 | 2.6 |

## LONE TREE SECTION:

|          |      |       |       |    |      |       |       |       |      |       |      |       |      |     |       |      |       |      |      |      |      |      |     |
|----------|------|-------|-------|----|------|-------|-------|-------|------|-------|------|-------|------|-----|-------|------|-------|------|------|------|------|------|-----|
| SAMPLE   | Sc   | V     | Cr    | Co | Ni   | Cu    | Zn    | Rb    | Sr   | Y     | Zr   | Nb    | Mo   | Ba  | La    | Ce   | Nd    | Sm   | Yb   | Hf   | Pb   | Th   | U   |
| CR03-460 | 26.6 | 293.1 | 5.2   |    | 56.8 | 51.9  | 30.3  | 121.6 | 22.1 | 509.5 | 33.9 | 198.7 | 11.9 | 0.5 | 466.8 | 18.7 | 57.6  | 31.5 | 7.9  | 4.3  | 4.5  | 5.5  | 3.2 |
| CR03-461 | 27.6 | 298.5 | 126.8 |    | 66.6 | 152.5 | 69.7  | 96.8  | 2.4  | 441.8 | 25.3 | 127.4 | 7.1  | 0.9 | 135.9 | 7.7  | 31.1  | 17.3 | 3.6  | 0.7  | 2.8  | 2.6  | 2.2 |
| CR03-462 | 30.3 | 285.7 | 270   |    | 67.4 | 208.1 | 69.9  | 92.7  | 1.9  | 381.7 | 22.8 | 109.1 | 6.6  | 0.8 | 123.6 | 9.6  | 20.2  | 15   | 4.4  | -2.1 | 0.9  | 2.6  | 1.2 |
| CR03-463 | 35.1 | 302.6 | 513.1 |    | 71.7 | 270   | 139.3 | 98.2  | 2    | 378.2 | 25.3 | 111.8 | 6    | 0.4 | 130.1 | 4.5  | 23.6  | 17.5 | 6.4  | -1.4 | 0.9  | 3.9  | 0   |
| CR03-464 | 29.5 | 274.9 | 231.5 |    | 57.6 | 169.4 | 93.1  | 91.7  | 1.8  | 436   | 25.2 | 116.3 | 6.8  | 0.1 | 143.8 | 9.2  | 28.6  | 17.6 | 6.8  | 2.4  | 2.7  | 1.8  | 1.3 |
| CR03-465 | 25.8 | 274.6 | 89.9  |    | 59.4 | 134.3 | 58.1  | 95.2  | 5    | 470.8 | 24.8 | 127.1 | 7.6  | 0.8 | 210.3 | 7.4  | 31.4  | 15.6 | 4.7  | 0.7  | 2.5  | 2.9  | 1.8 |
| CR03-466 | 29.2 | 271.4 | 244.3 |    | 59.3 | 177.6 | 87.2  | 95.3  | 1.5  | 440.7 | 26.1 | 119.3 | 6.7  | 1.3 | 122.1 | 16.7 | 29.3  | 17.7 | 2.8  | -0.9 | 2.1  | 2.4  | 1   |
| CR03-467 | 32.3 | 309   | 491.3 |    | 67.4 | 250.2 | 116.9 | 98.5  | 2.9  | 379.7 | 26.1 | 119.3 | 6.7  | 0.6 | 142.2 | 6.8  | 24.2  | 16.6 | 2.8  | -1.7 | 1.7  | 3.3  | 1.2 |
| CR03-468 | 30.1 | 279.9 | 244.3 |    | 58.2 | 166.9 | 91.5  | 93.4  | 2.6  | 434.8 | 24.2 | 116.8 | 6.5  | 0.6 | 137.2 | 8.4  | 25.2  | 18.6 | 3.6  | -0.4 | 1.6  | 3.2  | 0   |
| CR03-469 | 27.1 | 273.1 | 89.9  |    | 60.8 | 127.6 | 65.5  | 96.7  | 5.6  | 467.8 | 23.9 | 123.6 | 7.3  | 1   | 178   | 13.2 | 25.1  | 18.3 | 4.6  | 1.4  | 2.2  | 3    | 2.1 |
| CR03-470 | 21.3 | 319.5 | -11.8 |    | 44.6 | 21    | 28.4  | 119.1 | 41.2 | 506.4 | 35.3 | 230.3 | 14   | 0.8 | 606.9 | 24.2 | 61.8  | 35.8 | 8.4  | 3.9  | 5    | 8.2  | 2.9 |
| CR03-471 | 25.2 | 193.2 | 48.5  |    | 39.2 | 67.9  | 233.2 | 155.7 | 48.9 | 384.9 | 70.3 | 513.1 | 40   | 1.6 | 558   | 51   | 144.4 | 81.4 | 17.1 | 5.8  | 10.2 | 11.5 | 3.3 |
| CR03-472 | 28.4 | 256.6 | 349.9 |    | 58   | 183.5 | 79.7  | 99.1  | 11   | 415.4 | 25.3 | 158.1 | 8.9  | 1.5 | 334.7 | 13.5 | 36.4  | 20.1 | 5.6  | 0.9  | 3.1  | 3.9  | 2   |
| CR03-473 | 25.4 | 282   | 181.6 |    | 49.2 | 109   | 58.6  | 112.4 | 11.2 | 510.7 | 30.5 | 184.7 | 10.3 | 1.6 | 368   | 13.3 | 43.9  | 28.1 | 6    | 1.8  | 3.4  | 4.1  | 1.2 |
| CR03-474 | 31.8 | 298.3 | 609.9 |    | 62.2 | 252   | 82.1  | 99.8  | 2.8  | 392.9 | 24.3 | 109.2 | 5.5  | 1   | 161.3 | 5.8  | 28    | 17.7 | 4.7  | -2.4 | 1.7  | 3.3  | 1.9 |

## OREGON CANYON ROAD SECTION:

|        |      |       |      |    |      |      |      |       |       |       |       |       |      |      |        |      |       |      |      |     |      |      |      |
|--------|------|-------|------|----|------|------|------|-------|-------|-------|-------|-------|------|------|--------|------|-------|------|------|-----|------|------|------|
| SAMPLE | Sc   | V     | Cr   | Co | Ni   | Cu   | Zn   | Rb    | Sr    | Y     | Zr    | Nb    | Mo   | Ba   | La     | Ce   | Nd    | Sm   | Yb   | Hf  | Pb   | Th   | U    |
| CR-641 | 27.4 | 339.3 | 0.6  |    | 34   | 22.9 | 73.7 | 116.5 | 56    | 486.2 | 34.8  | 200.3 | 9.2  | 2.2  | 829.7  | 23.4 | 59.4  | 31.7 | 7.4  | 3.6 | 6.7  | 5.5  | 4    |
| CR-642 | -0.4 | 8.3   | 1.9  |    | 9.6  | -4.2 | 5.4  | 137.6 | 179.9 | 8.4   | 68.7  | 599.4 | 27.5 | -0.8 | 21.5   | 33.1 | 61.9  | 45.8 | 10.3 | 6.9 | 16.7 | 25.8 | 10.9 |
| CR-643 | 9.4  | 13.7  | 0.8  |    | 9.4  | -3.9 | 4.7  | 126.5 | 183.9 | 7.7   | 106.1 | 613.4 | 22.6 | -3.3 | 11.9   | 67.7 | 151.9 | 84.1 | 19.4 | 7.8 | 16.6 | 26.3 | 9.2  |
| CR-644 | 27.6 | 213.2 | -5   |    | 28.4 | 4.3  | 19.5 | 117.8 | 58.2  | 560.6 | 42.9  | 231.2 | 10.1 | 2.1  | 1931.9 | 23   | 69.1  | 36.3 | 5.2  | 3.7 | 7.4  | 5.9  | 4.5  |
| CR-645 | 31.9 | 237.5 | 5.8  |    | 33.1 | 17.9 | 70.2 | 115   | 42.6  | 405.5 | 38.3  | 188.6 | 9    | 1.8  | 753.2  | 23.3 | 55.4  | 28.4 | 8.6  | 4.1 | 6.9  | 6.1  | 2.2  |
| CR-646 | 28.2 | 337.5 | 1.1  |    | 37   | 29.3 | 87.4 | 110.6 | 46.8  | 471.2 | 34.8  | 190.5 | 8.1  | 1.9  | 717    | 24.8 | 59.4  | 28.3 | 4.6  | 3   | 6.3  | 5.4  | 2.6  |
| CR-647 | 1.4  | 12.6  | -1.5 |    | 8    | -3.6 | 7.9  | 156.8 | 120   | 19.6  | 53    | 424.7 | 19.5 | -0.2 | 107    | 46.4 | 104.6 | 47.5 | 8.9  | 4.8 | 11.7 | 20.1 | 6.5  |
| CR-648 | 0.2  | 3.8   | 1.3  |    | 7.8  | -4   | 7.4  | 146.5 | 183.7 | 10.3  | 55.1  | 432.4 | 22.4 | 0.8  | 109    | 44.8 | 110.8 | 51   | 11.8 | 6.3 | 11.5 | 24.6 | 13.8 |
| CR-649 | 3.1  | 4.7   | 2.1  |    | 5.8  | -3.3 | 6.7  | 124.6 | 175.1 | 12.5  | 40.7  | 398.6 | 20.3 | 0.4  | 253.8  | 36.5 | 75.2  | 40.2 | 8.6  | 6   | 11.4 | 23.4 | 13.4 |
| CR-650 | 22.5 | 106.6 | -1.7 |    | 23   | 3.7  | 26.7 | 143.8 | 98.8  | 302.6 | 49.3  | 300.8 | 19.6 | 2.7  | 2020.2 | 39.6 | 87.4  | 47.7 | 8.2  | 4.5 | 8.3  | 12.1 | 8.6  |

Note: Tuff of Oregon Canyon can be traced from Oregon Canyon to Oregon Canyon Min Rd section. Tlc = 642 and 643. The Tuff of Trout Creek (Tl = 647, 648, and 649), although 649 may include related Tuff of Long Ridge

## POKER JIM RIDGE SECTION:

| SAMPLE | Sc   | V     | Cr    | Co   | Ni    | Cu    | Zn   | Rb  | Sr    | Y    | Zr    | Nb          | Mo    | Ba          | La      | Ce       | Nd  | Sm  | Yb  | Hf      | Pb | Th   | U           |
|--------|------|-------|-------|------|-------|-------|------|-----|-------|------|-------|-------------|-------|-------------|---------|----------|-----|-----|-----|---------|----|------|-------------|
| JM-01  | 38.2 | 340.5 | 193.4 | 48.8 | 106.4 | 119.7 | 74.6 | 0.8 | 308.3 | 22.7 | 78.3  | 3.9 <LL     | 763   | 4.5 6.1 <LL | 4.9 <LL | <LL      | <LL | <LL | <LL | 0.9 <LL |    | 8.4  | 4.2 0.5 <LL |
| JM-02  | 33   | 322.4 | 175.6 | 52.9 | 145.9 | 150.1 | 94.3 | 7.4 | 436.1 | 25.2 | 125.1 | 7.4 0.1 <LL | 348.4 | 12.9        | 22.7    | 13 <LL   | <LL | <LL | <LL | 1.5 <LL |    | 9.4  | 6.5         |
| JM-03  | 25.9 | 271.3 | 166.2 | 59.3 | 215.3 | 151.3 | 85.9 | 8.8 | 370.1 | 21.3 | 103.9 | 6.3 0.2 <LL | 282.2 | 13.6        | 15.9    | 10.7 <LL | <LL | <LL | <LL | 2.6 <LL |    | 9.7  | 6.2         |
| JM-04  | 32.1 | 280.9 | 282.7 | 58.6 | 178.3 | 156.1 | 86.4 | 9.6 | 465   | 20.9 | 104.3 | 5.2 <LL     | 270   | 9.6         | 12.5    | 9.7 <LL  | <LL | <LL | <LL | 1.9 <LL |    | 9.8  | 5.1 0.7 <LL |
| JM-05  | 31.4 | 289.8 | 240.5 | 57.5 | 165.5 | 134.2 | 83   | 9   | 472.7 | 20.8 | 104.3 | 5.3 <LL     | 257.1 | 10.2        | 15.5    | 10.3 <LL | <LL | <LL | <LL | 2.2 <LL |    | 9.4  | 5.6 0.9 <LL |
| JM-06  | 32.6 | 276.5 | 247.8 | 51.2 | 139.6 | 127.2 | 78   | 8.1 | 488.7 | 20.3 | 101.4 | 4.9 <LL     | 258.4 | 8.7         | 18.7    | 6.9 <LL  | <LL | <LL | <LL | 2.7 <LL |    | 9.4  | 5.7         |
| JM-07  | 31.8 | 300.9 | 196.3 | 52.9 | 142   | 142.5 | 83   | 6.4 | 513.6 | 21.3 | 114.7 | 7.2 0.3 <LL | 249.1 | 14.1        | 27.1    | 12.8 <LL | <LL | <LL | <LL | 1.7 <LL |    | 9.2  | 5.6 1.0 <LL |
| JM-08  | 35   | 330.8 | 326.5 | 59   | 170   | 173.6 | 81.1 | 2.2 | 418.9 | 21.1 | 105.7 | 5.6 0.0 <LL | 193.2 | 7.9 9.4 <LL | <LL     | <LL      | <LL | <LL | <LL | 7.9 <LL |    | 9.7  | 4.5         |
| JM-09  | 33.4 | 314.9 | 268.4 | 57.2 | 152.3 | 158.9 | 87.4 | 8.9 | 399   | 23.9 | 127.7 | 7.5 0.4 <LL | 226.5 | 15.5        | 16.8    | 14.4 <LL | <LL | <LL | <LL | 1.6 <LL |    | 11.1 | 5.8         |

|         |      |               |       |      |       |       |       |      |       |      |       |              |       |             |      |              |         |             |              |
|---------|------|---------------|-------|------|-------|-------|-------|------|-------|------|-------|--------------|-------|-------------|------|--------------|---------|-------------|--------------|
| JM-10   | 34.5 | 323.7         | 150.9 | 57.1 | 165.9 | 152.3 | 83.3  | 8    | 431.2 | 23.3 | 121   | 7.6 <LL      | 222.3 | 11.5        | 17.2 | 8.2 <LL      | 2.1 <LL | 9.7         | 52.0 <LL     |
| JM-11   | 33.2 | 321.5         | 280.5 | 54.9 | 135.1 | 132.5 | 84.8  | 14.3 | 409.8 | 23.4 | 127.2 | 7.0 <LL      | 237.8 | 11.7        | 22.3 | 12.6 <LL     | 0.7 <LL | 9.6         | 6.1          |
| JM-12   | 27.5 | 313.9         | 66.6  | 57.4 | 141.1 | 172.5 | 97.1  | 13.2 | 541.9 | 24.7 | 140.5 | 8.7 <LL      | 247.8 | 16.5        | 24.7 | 16.1 <LL     | 3.6     | 10.1        | 7.6 0.2 <LL  |
| PJ-01   | 26   | 331.2         | 88.4  | 46.8 | 77.6  | 143.1 | 88.9  | 8.8  | 622   | 24.8 | 141.4 | 8.3 <LL      | 330.4 | 18.1        | 29.1 | 15.1 <LL     | 3.5     | 8.9         | 7.3          |
| PJ-02   | 28.8 | 312.4         | 49.6  | 45.2 | 74.4  | 159.7 | 80.3  | 11.9 | 533.8 | 23.9 | 113.2 | 6.2 <LL      | 326.6 | 15          | 28.2 | 15.1 <LL     | 29 <LL  | 9.2         | 5.1          |
| PJ-03   | 28.8 | 305.7         | 49.1  | 45.6 | 79.9  | 140.7 | 79    | 11   | 559.1 | 23   | 110.4 | 6.1 0.1 <LL  | 342   | 14.7        | 26.6 | 15 <LL       | 23 <LL  | 8.9         | 5.5 <LL      |
| PJ-04   | 29.8 | 328.4         | 50.7  | 40.7 | 67    | 171.8 | 89.3  | 12.3 | 579.7 | 27.8 | 148.4 | 8.1 <LL      | 367.9 | 16.7        | 35.3 | 21.7 <LL     | 4.4     | 8.8         | 7.2 <LL      |
| PJ-05   | 28.8 | 369.1         | 49.1  | 41   | 61.5  | 183.4 | 99.2  | 14.8 | 587.4 | 31.7 | 178.9 | 10.5 <LL     | 394.9 | 22          | 36.8 | 24.8 <LL     | 3.6     | 10.7        | 7.6 0.9 <LL  |
| PJ-06   | 31.6 | 377.5         | 24.9  | 52.3 | 63.5  | 225.1 | 119.3 | 23.3 | 464.3 | 38   | 192.9 | 12.3 0.7     | 519.8 | 28.5        | 49.7 | 33 <LL       | 7.9     | 12.9        | 8.3          |
| PJ-07   | 27.8 | 331.7         | 31.6  | 50.3 | 68.8  | 177.9 | 105.3 | 21.7 | 521.2 | 31.8 | 177.3 | 9.2 0.4 <LL  | 431.8 | 21.5        | 36.2 | 25.3 <LL     | 5.8     | 11.6        | 7.9          |
| PJ-08   | 24.9 | 319.8         | 31.8  | 41.8 | 66.5  | 211.1 | 99.3  | 23.2 | 533.3 | 31.6 | 177.4 | 9.5 0.1 <LL  | 418.3 | 20.7        | 36   | 23.6 <LL     | 5.3     | 11          | 8.5          |
| PJ-09   | 28.4 | 330.8         | 32.5  | 47.9 | 73.5  | 225.6 | 108   | 23.4 | 502.8 | 34.1 | 187.1 | 10.6 0.7     | 448.9 | 23.1        | 46.2 | 28.6 <LL     | 6.9     | 10.1        | 9.1 0.9 <LL  |
| PJ-10   | 27.6 | 348.2         | 32.3  | 47.8 | 70.1  | 217.6 | 106.9 | 17.7 | 502.9 | 32.3 | 179   | 9.6 0.1 <LL  | 448.5 | 24.3        | 45.5 | 23.2 <LL     | 5.4     | 10.9        | 8.2          |
| PJ-12   | 28.3 | 302.7         | 39    | 32.7 | 78.5  | 195.5 | 114.3 | 17.1 | 544   | 34.2 | 188.7 | 10.3 1.3     | 222.1 | 16.8        | 38   | 24.9 <LL     | 5.5     | 10.5        | 8.7          |
| PJ-13   | 32.3 | 474.1         | 24.7  | 55.7 | 53.1  | 285.4 | 117.7 | 27.2 | 445.1 | 42.6 | 220   | 13.7 <LL     | 589.1 | 28.7        | 56.5 | 36.8 <LL     | 10.1    | 11.6        | 8            |
| PJ-14   | 30.6 | 430.4         | 21.6  | 45.3 | 56.4  | 263.7 | 114.9 | 28.2 | 500.2 | 40.6 | 226.7 | 14.0 1 <LL   | 617.4 | 26          | 53.1 | 35.3 <LL     | 6.2     | 11.6        | 8.6          |
| PJ-15   | 29.7 | 444           | 26.9  | 47.4 | 54.3  | 237.4 | 118.9 | 22.4 | 498.8 | 40.6 | 223   | 13.2 0.1 <LL | 514.6 | 25.7        | 52.2 | 37.1 <LL     | 7.7     | 12          | 8.9          |
| PJ-16   | 26.2 | 402.1         | 23.4  | 45.8 | 51.7  | 235.7 | 112.8 | 22.8 | 561.7 | 36.3 | 213.2 | 13 <LL       | 502.7 | 27          | 45.3 | 32.5 <LL     | 5.9     | 11          | 9.6          |
| PJ-16K2 | 26.8 | 394.3         | 27.6  | 52.1 | 58.2  | 242.1 | 110.3 | 21   | 560   | 36.2 | 214.5 | 13.6 0.4 <LL | 478.5 | 23.2        | 40.2 | 30.6 <LL     | 6.5     | 11.4        | 9.8          |
| PJ-17   | 26   | 379.3         | 25.4  | 42.5 | 54    | 240.2 | 105   | 21.4 | 589.9 | 34.9 | 204.4 | 12.5 0.2 <LL | 468.9 | 25.2        | 51   | 30.7 <LL     | 6.7     | 10.9        | 9.1          |
| PJ-18   | 25.5 | 372.2         | 25.1  | 40.3 | 53.4  | 230.2 | 104.6 | 20.7 | 595.9 | 33.6 | 198.7 | 11.6 0.3 <LL | 459.2 | 21.9        | 48.3 | 27.8 <LL     | 5.6     | 10.6        | 8.5          |
| PJ-19   | 26   | 376.9         | 33.9  | 35.4 | 57.6  | 245.1 | 104.9 | 20.7 | 555.4 | 35.7 | 204.8 | 12.4 <LL     | 449.4 | 23.9        | 49   | 29.9 <LL     | 6.4     | 11.7        | 9.6          |
| PJ-20   | 31.7 | 456.5         | 41.3  | 54.6 | 65.7  | 299.1 | 127.1 | 26.3 | 487.5 | 40.4 | 233.3 | 14.4 0.5     | 527.6 | 28.3        | 56.5 | 35.3 <LL     | 6.5     | 10.6        | 9.2          |
| PJ-21   | 31   | 447.8         | 36.1  | 50.3 | 64.3  | 297.3 | 119.7 | 22.1 | 474.3 | 41.4 | 226   | 14.5 0.2 <LL | 519.1 | 27.2        | 54.2 | 33.9 1.3 <LL | 7.4     | 11.6        | 9.9          |
| PJ-21K2 | 29.8 | 425.3         | 38    | 45.7 | 65.9  | 253.2 | 113.4 | 23.4 | 492.6 | 39.8 | 205.8 | 14.5 0.1 <LL | 485.8 | 21.4        | 44.6 | 31.2 <LL     | 6.7     | 12.1        | 10.1 0.7 <LL |
| PJ-22   | 27.3 | 405.1         | 38.1  | 47.7 | 62.6  | 237.2 | 111.1 | 19.5 | 527.8 | 36.9 | 208.3 | 12.9 0.1 <LL | 484.8 | 28.5        | 53.2 | 31.2 <LL     | 6.3     | 11          | 8.8 0.8 <LL  |
| PJ-23   | 32.4 | 453.2         | 40.6  | 59.6 | 63.9  | 227.5 | 124   | 25.1 | 481.1 | 40.2 | 230.4 | 14.2 0.5     | 499.7 | 27.2        | 54   | 34.2 <LL     | 7       | 11.8        | 9.4          |
| PJ-24   | 29.2 | 404           | 36.5  | 49.3 | 62.4  | 169.8 | 110.4 | 19.1 | 520.1 | 35.7 | 209.1 | 12.4 <LL     | 471.7 | 22.4        | 43.4 | 33.1 <LL     | 7.1     | 11.1        | 8.7          |
| PJ-25   | 34.9 | 485.3         | 43.2  | 62.7 | 65    | 291.3 | 132.3 | 21.9 | 450.8 | 43   | 245.8 | 12.6 0.0 <LL | 537.8 | 30.1        | 59.3 | 37.5 <LL     | 8       | 12.1        | 9.9          |
| PJ-26   | 30   | 377.2         | 42.2  | 50.2 | 60.2  | 203.3 | 113.3 | 22.7 | 523.5 | 35.4 | 205.3 | 13.2 0.7     | 457.6 | 26.4        | 53.5 | 32.1 <LL     | 6.9     | 10.6        | 11.7         |
| PJ-27   | 37.6 | 321.4 <LL     |       | 43.3 | 11.7  | 32.2  | 117   | 36   | 482.5 | 41.5 | 225.5 | 9.8          | 887.1 | 35          | 63.1 | 35.2 <LL     | 4.6     | 9.2         | 8.2 0.9 <LL  |
| PJ-28   | 37.6 | 304.9 <LL     |       | 35.4 | 8.6   | 23.5  | 108.5 | 34.2 | 485.6 | 45   | 223.5 | 14           | 798.4 | 33.3        | 57.8 | 36.1 <LL     | 1.6 <LL | 8.8         | 6.8 0.9 <LL  |
| PJ-29   | 23.9 | 327.8         | 49.9  | 49.1 | 108.1 | 159.4 | 99.5  | 14.9 | 592.2 | 28.3 | 151.5 | 9.8 0.5      | 386.6 | 22.5        | 35.5 | 21.9 <LL     | 4.8     | 10.2        | 9.1 0.3 <LL  |
| PJ-30   | 30.2 | 313.2         | 73.3  | 65.7 | 182.3 | 159.4 | 99.5  | 11   | 483.7 | 26   | 128.6 | 6.6 0.5 <LL  | 373.5 | 17.4        | 26.1 | 14.3 <LL     | 3       | 9.4         | 7.4          |
| PJ-31   | 30.2 | 295           | 72    | 59.5 | 160.7 | 154   | 97.9  | 11   | 462.4 | 25.8 | 127.1 | 6.7 0.1 <LL  | 313.3 | 19.6        | 22.8 | 14.6 <LL     | 4.6     | 9.2         | 8.2 0.9 <LL  |
| PJ-32   | 28.8 | 297           | 68.2  | 63.8 | 171.3 | 176.1 | 100.7 | 9.8  | 480.3 | 25.7 | 130.7 | 6.8          | 377.2 | 18.8        | 36.3 | 14.4         | 7.3 <LL | 6.8         | 9.8          |
| PJ-33   | 28.2 | 308.5         | 70.2  | 66.9 | 160.5 | 158   | 95.4  | 5.7  | 483   | 24.1 | 120   | 6.2 0.0 <LL  | 277.4 | 16.8        | 29.2 | 15.6 <LL     | 4.6     | 9.8         | 5.9          |
| PJ-34   | 26.3 | 402.7         | 5.5   | 48.1 | 58.5  | 213.1 | 120.5 | 33.9 | 512.5 | 37.5 | 230.6 | 13.5 0.2 <LL | 616.7 | 35.1        | 61.5 | 37.3 <LL     | 9.7     | 13          | 10.3         |
| PJ-35   | 28   | 420.7 2.0 <LL |       | 46.4 | 54.7  | 280.4 | 119.1 | 29.7 | 556.6 | 38.6 | 230.2 | 14 0.7       | 623.1 | 30.5        | 51.9 | 34.3 <LL     | 8.2     | 12.8        | 10.4         |
| PJ-36   | 27.6 | 329.9         | 69.4  | 54.4 | 119.8 | 164.4 | 110.3 | 12.7 | 555.6 | 29.9 | 155.1 | 9.0 0 <LL    | 426.7 | 18.7        | 28.7 | 20.8 <LL     | 3       | 11.1        | 8.5 0.6 <LL  |
| PJ-37   | 32.3 | 349.8         | 18.1  | 43.4 | 29.2  | 191.9 | 126.4 | 45.6 | 444.4 | 39.2 | 203.5 | 11.8         | 694.9 | 27          | 43.1 | 30.7 <LL     | 6       | 13.7        | 11           |
| PJ-38   | 32.9 | 338.6         | 22.2  | 43.7 | 30.1  | 169.6 | 123.5 | 40.3 | 451.3 | 38.5 | 203.7 | 11.6 0.7     | 700.1 | 24.6        | 51.2 | 32.5 <LL     | 5.4     | 14.6        | 10.6         |
| PJ-39   | 31   | 343.1         | 21.8  | 45.2 | 31.4  | 139.8 | 120.1 | 40.8 | 449.7 | 37   | 197.6 | 11.1 0.5     | 671.6 | 23.6        | 43.1 | 30.1 <LL     | 5.9     | 14.3        | 9.5          |
| PJ-40   | 41.6 | 237.5         | 284.9 | 49.5 | 167.1 | 106   | 49.1  | 2.3  | 183   | 17.3 | 43.7  | 4.2 0.3 <LL  | 128.1 | 5.5 4.3 <LL |      | <LL          |         | 9.8 1.4 <LL | 1            |

## REYNOLDS SECTION:

|        |      |       |       |      |       |       |       |       |       |      |       |       |     |        |       |       |      |      |     |      |     |     |      |
|--------|------|-------|-------|------|-------|-------|-------|-------|-------|------|-------|-------|-----|--------|-------|-------|------|------|-----|------|-----|-----|------|
| SAMPLE | Sc   | V     | Cr    | Co   | Ni    | Cu    | Zn    | Rb    | Sr    | Y    | Zr    | Nb    | Mo  | Ba     | La    | Ce    | Nd   | Sm   | Yb  | Hf   | Pb  | Th  | U    |
| CR423  | 25.1 | 257.3 | 194   | 184  | 57.7  | 206.9 | 67.9  | 106.2 | 4     | 404  | 23.9  | 116.9 | 9   | 1.3    | 112.5 | 10.1  | 24   | 18.7 | 2.9 | -1.5 | 2.2 | 2.9 | 0.7  |
| CR424  | 32.8 | 306.8 | 217.4 | 57.1 | 213.3 | 74    | 105.2 | 3.8   | 474.4 | 28.1 | 126.9 | 8.9   | 0.3 | 176.4  | 12.9  | 32.9  | 20.9 | 20.9 | 3.5 | 2.2  | 1.5 | 1.2 | 0.3  |
| CR425  | 27.6 | 276.1 | 445.2 | 60.4 | 218.5 | 101.7 | 108.2 | 6.2   | 412.2 | 23.2 | 140.1 | 10.4  | 1.2 | 292.6  | 16.8  | 35    | 21.1 | 21.1 | 4.1 | 1.5  | 3   | 3.7 | 4.2  |
| CR426  | 26.1 | 250.3 | 450.9 | 55.3 | 219.7 | 64.5  | 102.4 | 9.3   | 402.3 | 22.9 | 135.4 | 10.1  | 1   | 253.5  | 14.2  | 33.2  | 18.9 | 3.7  | 3.7 | -0.3 | 2.8 | 3.5 | 0.3  |
| CR427  | 30.1 | 297.9 | 117.8 | 56.4 | 167.6 | 69.2  | 108.4 | 3.9   | 519.7 | 25.2 | 132.8 | 11.8  | 0.6 | 202.8  | 11.4  | 36.4  | 22.4 | 5.4  | 5.4 | -3.8 | 2.6 | 1.2 | 4.6  |
| CR428  | 26.3 | 245.2 | 489.7 | 57.4 | 259.6 | 99    | 101.3 | 1.4   | 382.7 | 21   | 124   | 9.4   | 0.4 | 221.2  | 5.4   | 34    | 16.3 | 16.3 | 4.6 | 0.5  | 3.5 | 2.9 | 2.7  |
| CR429  | 22.4 | 257.8 | 67.1  | 53.3 | 87    | 40.5  | 104.4 | 14.1  | 476.3 | 25.5 | 151.4 | 12.2  | 0.9 | 296.1  | 12.5  | 43.1  | 25.8 | 18.2 | 4   | -1.4 | 3.7 | 3.8 | 5.2  |
| CR430  | 27.5 | 281.2 | 212.5 | 56.6 | 226.1 | 102.4 | 97.4  | 3.2   | 436.5 | 23.3 | 114.6 | 9.4   | 0.7 | 142.6  | 11.7  | 35.8  | 18.2 | 3.7  | 3.7 | -0.1 | 3.6 | 1.7 | 0.3  |
| CR431  | 24.4 | 240.3 | 44.1  | 53.4 | 256.1 | 109.3 | 98.3  | 0.3   | 408.7 | 22   | 130.1 | 9.4   | 1   | 174.4  | 11.8  | 33.7  | 18.8 | 4.4  | 4.4 | -2.4 | 3   | 2.5 | 0.4  |
| CR432  | 25.4 | 255.7 | 500.3 | 55.3 | 236.7 | 98.4  | 103.6 | 9.7   | 389.6 | 22.8 | 135.9 | 9.9   | 1.1 | 261.4  | 12.3  | 40    | 20.2 | 4.4  | 4.4 | 0.2  | 3.6 | 3.4 | 0.2  |
| CR433  | 25.9 | 247.2 | 436.7 | 53.5 | 226.3 | 87.5  | 101.4 | 8.8   | 392   | 22.1 | 131.3 | 10.1  | 0.8 | 242.3  | 15.4  | 42.2  | 22.7 | 4.3  | 4.3 | 4    | 2.6 | 3.3 | 0.2  |
| CR434  | 22.3 | 246.9 | 63    | 49.6 | 84.1  | 38.2  | 103   | 13    | 478.3 | 25.8 | 152.8 | 11.8  | 1   | 292    | 17.6  | 51.9  | 24.3 | 3.4  | 3.4 | -0.9 | 4.2 | 2.8 | 1    |
| CR435  | 26.1 | 257   | 224   | 52.3 | 138.2 | 46    | 97.4  | 8.1   | 428.1 | 22.8 | 122.9 | 11    | 1.7 | 169.7  | 13.7  | 35.1  | 19   | 4.7  | 4.7 | 0.3  | 3.3 | 4.4 | -0.4 |
| CR436  | 24.2 | 251.7 | 160   | 49.8 | 123.4 | 56.8  | 97.5  | 3.8   | 471.4 | 24.5 | 135.8 | 12    | 0.1 | 214.6  | 15.9  | 37.7  | 20.8 | 4.5  | 4.5 | -2.3 | 4.2 | 0.7 | 2.1  |
| CR437  | 26.2 | 264.5 | 176.5 | 52.9 | 206.5 | 96.3  | 99.2  | 3.7   | 455.1 | 23.4 | 113.4 | 9.3   | 1.6 | 127.4  | 2.2   | 25.8  | 15.6 | 4.6  | 4.6 | -3.2 | 3.5 | 2.4 | 0.8  |
| CR438  | 16.5 | 53.3  | -7.8  | 27   | 3     | 12.9  | 131.3 | 127.9 | 299.4 | 45.4 | 322.1 | 21.4  | 1.1 | 1842.6 | 49.9  | 101.9 | 48.8 | 8.3  | 8.3 | 4.2  | 8.7 | 2.3 | 9.8  |



|       |      |       |       |      |       |       |       |      |       |      |       |      |     |       |      |      |      |     |      |     |     |     |      |
|-------|------|-------|-------|------|-------|-------|-------|------|-------|------|-------|------|-----|-------|------|------|------|-----|------|-----|-----|-----|------|
| CR363 | 22.1 | 259.5 | 23.1  | 55.8 | 114.6 | 79    | 124.6 | 12.4 | 484.9 | 30.5 | 175.9 | 13.1 | 1.3 | 277   | 13.8 | 50.4 | 30.4 | 5.8 | 2.5  | 4   | 3.8 | 3.9 | 1.6  |
| CR364 | 24.8 | 272.2 | 22.7  | 47.6 | 81.8  | 44.5  | 111.5 | 13.1 | 493.6 | 29   | 174.4 | 13.2 | 1.4 | 332.6 | 13.5 | 44.4 | 27.1 | 5.9 | -0.8 | 4.4 | 4.4 | 5.1 | -0.8 |
| CR365 | 26.5 | 276.3 | 31.7  | 48.8 | 106.8 | 114.7 | 101.7 | 3.5  | 435.2 | 31.9 | 156.7 | 10.1 | 0.6 | 295.9 | 11.3 | 37.4 | 23   | 3.7 | 2.9  | 4.2 | 3.7 | 2.5 | 1    |
| CR366 | 27.3 | 257.1 | 127.2 | 53.8 | 134.6 | 42.9  | 107.6 | 4.4  | 469.6 | 26   | 138.3 | 9.8  | 0.4 | 121.1 | 2.2  | 32.8 | 22.4 | 3.1 | 2.8  | 3.9 | 2.4 | 3.2 | 0.8  |
| CR367 | 21.5 | 240.9 | 42.5  | 44   | 85.1  | 42.1  | 120.4 | 15.8 | 524.4 | 35.1 | 236   | 16.8 | 1   | 604.9 | 22.4 | 64.4 | 39.7 | 7.8 | 2.7  | 5.8 | 5.6 | 5.5 | 1.5  |
| CR368 | 23.9 | 252.8 | 78.7  | 56.7 | 144.1 | 45.8  | 110   | 10.1 | 442.5 | 26.5 | 139.6 | 11.1 | 2.3 | 215.5 | 11.7 | 38.5 | 23.3 | 5.7 | 3.4  | 4.1 | 4.8 | 4   | 1.4  |
| CR369 | 23.1 | 233.4 | 73.8  | 47.5 | 127   | 49    | 106.7 | 13.3 | 473.2 | 27.5 | 167.5 | 12.2 | 0.8 | 409.6 | 20.7 | 49.4 | 29.4 | 4   | 2.3  | 4.3 | 4.5 | 5.3 | 1.6  |
| CR370 | 23.9 | 283.9 | 21.5  | 47.5 | 54    | 87.3  | 132.4 | 37.4 | 445.7 | 41.1 | 269.4 | 20.8 | 1.6 | 658   | 32.8 | 76.4 | 42.8 | 8.3 | 5    | 7.7 | 8.6 | 5.4 | 3.1  |
| CR371 | 23.9 | 218.1 | 118   | 47.6 | 117.8 | 106.1 | 100.6 | 8.1  | 612.6 | 25.2 | 153.1 | 10.4 | 1.1 | 313.6 | 11.7 | 35.8 | 23.6 | 6.5 | 2.6  | 4.7 | 2.4 | 3.2 | 2    |

STEENS MOUNTAIN SECTION:

| SAMPLE  | Sc | V   | Cr  | Co  | Ni  | Cu  | Zn  | Rb | Sr  | Y  | Zr  | Nb   | Mo   | Ba  | La | Ce | Nd | Sm   | Yb  | Hf | Pb | Th | U |
|---------|----|-----|-----|-----|-----|-----|-----|----|-----|----|-----|------|------|-----|----|----|----|------|-----|----|----|----|---|
| MF94-63 | 27 | 338 | 160 | 189 | 112 | 226 | 91  | 12 | 432 | 30 | 161 | 14.4 | 13   | 243 | 13 | 33 | 33 | 12.7 | 33  | 1  | 1  | 1  | U |
| MF94-64 | 25 | 296 | 189 | 189 | 101 | 185 | 88  | 8  | 476 | 27 | 150 | 12.7 | 12   | 238 | 12 | 43 | 43 | 12.7 | 238 | 3  | 3  | 0  | U |
| MF94-65 | 27 | 289 | 500 | 500 | 215 | 104 | 92  | 15 | 399 | 28 | 151 | 13.8 | 8    | 263 | 8  | 34 | 34 | 13.8 | 263 | 1  | 1  | 2  | U |
| MF94-66 | 30 | 311 | 650 | 650 | 261 | 129 | 90  | 11 | 327 | 26 | 132 | 10.4 | 10   | 203 | 10 | 20 | 20 | 10.4 | 203 | 3  | 3  | 1  | U |
| MD94-67 | 36 | 347 | 296 | 296 | 94  | 185 | 91  | 12 | 346 | 31 | 165 | 12.8 | 10   | 205 | 10 | 29 | 29 | 12.8 | 205 | 1  | 1  | 1  | U |
| MF94-68 | 28 | 324 | 274 | 274 | 134 | 166 | 85  | 15 | 309 | 29 | 138 | 10.9 | 10   | 175 | 4  | 29 | 29 | 10.9 | 175 | 0  | 0  | 4  | U |
| MF94-69 | 28 | 296 | 463 | 463 | 248 | 109 | 83  | 12 | 300 | 26 | 127 | 10.9 | 0    | 148 | 0  | 29 | 29 | 10.9 | 148 | 1  | 1  | 1  | U |
| MF94-70 | 28 | 311 | 153 | 153 | 107 | 147 | 87  | 11 | 486 | 25 | 140 | 11.5 | 11.5 | 196 | 0  | 22 | 22 | 11.5 | 196 | 2  | 2  | 0  | U |
| MF9471A | 32 | 376 | 238 | 238 | 119 | 149 | 101 | 10 | 407 | 30 | 148 | 11.4 | 11.4 | 238 | 9  | 22 | 22 | 11.4 | 238 | 3  | 3  | 1  | U |
| MF9471B | 27 | 338 | 160 | 160 | 112 | 226 | 91  | 12 | 432 | 30 | 161 | 14.4 | 14.4 | 243 | 13 | 33 | 33 | 14.4 | 243 | 1  | 1  | 1  | U |
| MF9471C | 40 | 381 | 241 | 241 | 126 | 169 | 103 | 12 | 408 | 29 | 149 | 11.2 | 11.2 | 216 | 3  | 37 | 37 | 11.2 | 216 | 0  | 0  | 5  | U |
| MF9472  | 36 | 290 | 606 | 606 | 240 | 121 | 86  | 9  | 340 | 23 | 117 | 10.4 | 10.4 | 150 | 14 | 25 | 25 | 10.4 | 150 | 0  | 0  | 3  | U |
| JS001   | 25 | 302 | 146 | 146 | 110 | 188 | 85  | 13 | 450 | 26 | 143 | 11.2 | 11.2 | 211 | 2  | 47 | 47 | 11.2 | 211 | 0  | 0  | 2  | U |
| JS002   | 25 | 323 | 489 | 489 | 176 | 126 | 89  | 12 | 330 | 26 | 138 | 10.4 | 10.4 | 187 | 0  | 30 | 30 | 10.4 | 187 | 0  | 0  | 1  | 1 |
| JS003   | 24 | 321 | 278 | 278 | 137 | 150 | 84  | 12 | 310 | 28 | 140 | 11   | 11   | 189 | 16 | 28 | 28 | 11   | 189 | 2  | 2  | 3  | 1 |
| JS004   | 24 | 291 | 461 | 461 | 285 | 116 | 116 | 10 | 314 | 25 | 126 | 9.7  | 9.7  | 136 | 6  | 30 | 30 | 9.7  | 136 | 4  | 4  | 1  | 1 |
| JS005   | 24 | 294 | 292 | 292 | 146 | 146 | 81  | 8  | 378 | 26 | 138 | 10.8 | 10.8 | 167 | 5  | 32 | 32 | 10.8 | 167 | 0  | 0  | 0  | 0 |
| JS006   | 25 | 322 | 281 | 281 | 120 | 161 | 85  | 12 | 360 | 28 | 140 | 11.2 | 11.2 | 178 | 11 | 35 | 35 | 11.2 | 178 | 4  | 4  | 1  | 1 |
| JS007   | 34 | 374 | 296 | 296 | 85  | 234 | 99  | 5  | 347 | 36 | 183 | 14.9 | 14.9 | 235 | 20 | 56 | 56 | 14.9 | 235 | 0  | 0  | 4  | 4 |
| JS008   | 34 | 366 | 330 | 330 | 113 | 149 | 91  | 11 | 336 | 30 | 154 | 12.2 | 12.2 | 148 | 23 | 40 | 40 | 12.2 | 148 | 2  | 2  | 3  | 3 |
| JS009   | 35 | 362 | 329 | 329 | 120 | 207 | 95  | 16 | 337 | 31 | 154 | 12.4 | 12.4 | 143 | 3  | 33 | 33 | 12.4 | 143 | 2  | 2  | 1  | 1 |
| JS010   | 33 | 390 | 276 | 276 | 120 | 132 | 99  | 8  | 322 | 32 | 165 | 15.4 | 15.4 | 106 | 11 | 50 | 50 | 15.4 | 106 | 1  | 1  | 2  | 2 |
| JS011   | 26 | 302 | 424 | 424 | 261 | 113 | 86  | 3  | 302 | 25 | 122 | 10.4 | 10.4 | 66  | 5  | 28 | 28 | 10.4 | 66  | 0  | 0  | 3  | 3 |
| JS012   | 35 | 351 | 407 | 407 | 164 | 127 | 88  | 6  | 285 | 28 | 134 | 12.5 | 12.5 | 77  | 16 | 27 | 27 | 12.5 | 77  | 0  | 0  | 1  | 1 |
| JS013   | 31 | 299 | 890 | 890 | 345 | 118 | 118 | 10 | 301 | 24 | 123 | 9.7  | 9.7  | 138 | 9  | 17 | 17 | 9.7  | 138 | 2  | 2  | 3  | 3 |
| JS014   | 27 | 293 | 592 | 592 | 280 | 176 | 90  | 7  | 243 | 23 | 109 | 8.8  | 8.8  | 92  | 4  | 27 | 27 | 8.8  | 92  | 4  | 4  | 1  | 1 |
| JS015   | 31 | 320 | 404 | 404 | 188 | 173 | 90  | 7  | 257 | 26 | 115 | 8.9  | 8.9  | 105 | 4  | 27 | 27 | 8.9  | 105 | 4  | 4  | 1  | 1 |
| JS016   | 27 | 303 | 484 | 484 | 260 | 162 | 85  | 9  | 303 | 26 | 129 | 10.7 | 10.7 | 147 | 19 | 43 | 43 | 10.7 | 147 | 0  | 0  | 1  | 1 |
| JS017   | 29 | 293 | 474 | 474 | 261 | 179 | 82  | 13 | 296 | 25 | 125 | 11.2 | 11.2 | 139 | 6  | 37 | 37 | 11.2 | 139 | 2  | 2  | 1  | U |
| JS018   | 34 | 300 | 385 | 385 | 196 | 125 | 84  | 12 | 303 | 26 | 128 | 10.9 | 10.9 | 131 | 16 | 44 | 44 | 10.9 | 131 | 1  | 1  | 0  | U |
| JS019   | 31 | 390 | 76  | 76  | 57  | 223 | 107 | 20 | 390 | 35 | 189 | 15.7 | 15.7 | 287 | 14 | 55 | 55 | 15.7 | 287 | 1  | 1  | 0  | U |
| JS020   | 29 | 377 | 108 | 108 | 50  | 184 | 113 | 25 | 379 | 38 | 198 | 18   | 18   | 363 | 24 | 67 | 67 | 18   | 363 | 4  | 4  | 3  | U |
| JS021   | 34 | 406 | 132 | 132 | 59  | 171 | 110 | 21 | 374 | 38 | 190 | 14.9 | 14.9 | 286 | 6  | 51 | 51 | 14.9 | 286 | 2  | 2  | 5  | U |
| JS022   | 31 | 309 | 321 | 321 | 192 | 84  | 82  | 6  | 342 | 25 | 120 | 9.4  | 9.4  | 89  | 6  | 26 | 26 | 9.4  | 89  | 0  | 0  | 1  | U |
| JS023   | 27 | 294 | 167 | 167 | 158 | 186 | 88  | 9  | 380 | 25 | 131 | 10.9 | 10.9 | 149 | 7  | 32 | 32 | 10.9 | 149 | 2  | 2  | 1  | U |
| JS024   | 36 | 412 | 176 | 176 | 75  | 200 | 110 | 8  | 360 | 34 | 169 | 13.2 | 13.2 | 197 | 11 | 49 | 49 | 13.2 | 197 | 0  | 0  | 3  | U |
| JS025   | 30 | 354 | 297 | 297 | 163 | 148 | 96  | 8  | 370 | 27 | 133 | 10.1 | 10.1 | 140 | 11 | 37 | 37 | 10.1 | 140 | 0  | 0  | 1  | U |
| JS026   | 27 | 337 | 269 | 269 | 162 | 147 | 96  | 5  | 391 | 26 | 125 | 9.6  | 9.6  | 139 | 14 | 42 | 42 | 9.6  | 139 | 0  | 0  | 1  | U |
| JS027   | 28 | 296 | 333 | 333 | 179 | 103 | 84  | 8  | 402 | 23 | 109 | 8.1  | 8.1  | 129 | 17 | 22 | 22 | 8.1  | 129 | 1  | 1  | 0  | U |
| JS028   | 27 | 336 | 177 | 177 | 125 | 214 | 102 | 10 | 448 | 24 | 125 | 7.1  | 7.1  | 223 | 0  | 31 | 31 | 7.1  | 223 | 0  | 0  | 3  | U |
| JS029   | 27 | 329 | 86  | 86  | 82  | 148 | 101 | 9  | 490 | 27 | 134 | 9.9  | 9.9  | 224 | 22 | 39 | 39 | 9.9  | 224 | 0  | 0  | 0  | U |
| JS030   | 32 | 408 | 141 | 141 | 103 | 227 | 107 | 9  | 430 | 29 | 138 | 9.3  | 9.3  | 228 | 13 | 36 | 36 | 9.3  | 228 | 3  | 3  | 3  | U |
| JS031   | 32 | 320 | 137 | 137 | 116 | 189 | 95  | 13 | 568 | 28 | 130 | 7.2  | 7.2  | 262 | 17 | 40 | 40 | 7.2  | 262 | 0  | 0  | 1  | U |
| JS032   | 22 | 250 | 84  | 84  | 63  | 99  | 92  | 47 | 517 | 29 | 181 | 13.8 | 13.8 | 584 | 5  | 50 | 50 | 13.8 | 584 | 4  | 4  | 4  | U |
| JS033   | 20 | 307 | 66  | 66  | 50  | 149 | 98  | 35 | 508 | 32 | 183 | 13.6 | 13.6 | 593 | 37 | 56 | 56 | 13.6 | 593 | 4  | 4  | 4  | U |
| JS034   | 24 | 298 | 76  | 76  | 79  | 129 | 105 | 20 | 464 | 31 | 157 | 11.6 | 11.6 | 444 | 30 | 36 | 36 | 11.6 | 444 | 2  | 2  | 4  | U |
| JS035   | 25 | 379 | 80  | 80  | 98  | 307 | 132 | 29 | 429 | 37 | 197 | 13.2 | 13.2 | 383 | 17 | 58 | 58 | 13.2 | 383 | 4  | 4  | 4  | U |
| JS036   | 26 | 323 | 107 | 107 | 79  | 139 | 102 | 19 | 466 | 32 | 156 | 10.3 | 10.3 | 386 | 12 | 65 | 65 | 10.3 | 386 | 3  | 3  | 3  | U |
| JS037   | 32 | 346 | 84  | 84  | 69  | 226 | 120 | 31 | 409 | 43 | 211 | 14.8 | 14.8 | 473 | 25 | 52 | 52 | 14.8 | 473 | 3  | 3  | 6  | U |
| JS038   | 29 | 342 | 95  | 95  | 58  | 260 | 114 | 22 | 454 | 37 | 190 | 13   | 13   | 415 | 11 | 49 | 49 | 13   | 415 | 2  | 2  | 3  | U |
| JS039   | 34 | 480 | 58  | 58  | 46  | 192 | 137 | 26 | 414 | 45 | 223 | 16.9 | 16.9 | 497 | 22 | 80 | 80 | 16.9 | 497 | 4  | 4  | 5  | U |
| JS040   | 32 | 422 | 85  | 85  | 61  | 240 | 128 | 18 | 461 | 40 | 205 | 16.1 | 16.1 | 430 | 13 | 50 | 50 | 16.1 | 430 | 7  | 7  | 5  | U |
| JS041   | 30 | 342 | 39  | 39  | 30  | 251 | 122 | 40 | 472 | 42 | 218 | 16.3 | 16.3 | 550 | 32 | 70 | 70 | 16.3 | 550 | 6  | 6  | 3  | U |
| JS041   | 30 | 342 | 39  | 39  | 30  | 251 | 122 | 40 | 472 | 42 | 218 | 16.3 | 16.3 | 550 | 32 | 70 | 70 | 16.3 | 550 | 6  | 6  | 3  | U |
| JS042   | 33 | 373 | 178 | 178 | 95  | 281 | 123 | 25 | 425 | 36 | 196 | 13.6 | 13.6 | 403 | 13 | 50 | 50 | 13.6 | 403 | 1  | 1  | 4  | U |
| JS043   | 30 | 344 | 118 | 118 | 60  | 205 | 103 | 19 | 491 | 31 | 158 | 11.8 | 11.8 | 402 | 11 | 53 | 53 | 11.8 | 402 | 4  | 4  | 2  | U |
| JS044   | 26 | 304 | 80  | 80  | 52  | 184 | 104 | 6  | 502 | 27 | 137 | 12.9 | 12.9 | 238 | 16 | 53 | 53 | 12.9 | 238 | 1  | 1  | 1  | U |
| JS045   | 34 | 402 | 82  | 82  | 51  | 281 | 126 | 20 | 439 | 42 | 206 | 15.1 | 15.1 | 449 | 35 | 71 | 71 | 15.1 | 449 | 3  | 3  | 3  | U |
| JS046   | 24 | 305 | 49  | 49  | 106 | 184 | 105 | 9  | 692 | 27 | 137 | 9.2  | 9.2  | 356 | 6  | 52 | 52 | 9.2  | 356 | 1  | 1  | 1  | U |
| JS047   | 36 | 448 | 31  | 31  | 42  | 225 | 130 | 27 | 452 | 44 | 215 | 14.6 | 14.6 | 526 | 21 | 63 | 63 | 14.6 | 526 | 5  | 5  | 3  | U |
| JS048   | 35 | 419 | 33  | 33  | 42  | 272 | 130 | 29 | 448 | 43 | 216 | 16   | 16   | 529 | 20 | 56 | 56 | 16   | 529 | 7  | 7  | 3  | U |
| JS049   | 36 | 445 | 54  | 54  | 55  | 222 | 124 | 21 | 479 | 39 | 197 | 13.9 | 13.9 | 466 | 12 | 59 | 59 | 13.9 | 466 | 4  | 4  | 4  | U |
| JS050   | 36 | 459 | 64  | 64  | 50  | 201 | 125 | 14 | 472 | 39 | 191 | 14   | 14   | 466 | 30 | 71 | 71 | 14   | 466 | 4  | 4  | 0  | U |

| SAMPLE | Sc | V   | Cr  | Co  | Ni  | Cu  | Zn | Rb  | Sr | Y   | Zr   | Nb  | Mo | Ba | La | Ce | Nd | Sm | Yb | Hf | Pb | Th | U |
|--------|----|-----|-----|-----|-----|-----|----|-----|----|-----|------|-----|----|----|----|----|----|----|----|----|----|----|---|
| JS051  | 32 | 387 | 45  | 101 | 137 | 109 | 16 | 510 | 34 | 161 | 10.3 | 369 | 25 | 34 | 0  | 0  | 0  | 0  | 0  | 0  | 0  | 0  | U |
| JS052  | 30 | 402 | 13  | 26  | 360 | 139 | 28 | 445 | 51 | 251 | 18.9 | 619 | 22 | 76 | 2  | 6  | U  |    |    |    |    |    | U |
| JS053  | 24 | 364 | 48  | 56  | 137 | 114 | 18 | 525 | 36 | 187 | 12.5 | 447 | 20 | 51 | 3  | 2  | U  |    |    |    |    |    | U |
| JS054  | 27 | 343 | 135 | 129 | 204 | 114 | 11 | 499 | 33 | 166 | 11.9 | 366 | 4  | 36 | 4  | 2  | U  |    |    |    |    |    | U |
| JS055  | 22 | 314 | 69  | 83  | 133 | 98  | 11 | 563 | 31 | 158 | 9.7  | 369 | 22 | 54 | 2  | 2  | U  |    |    |    |    |    | U |
| JS056  | 23 | 294 | 9   | 25  | 171 | 125 | 33 | 478 | 45 | 245 | 18.9 | 745 | 33 | 65 | 7  | 6  | U  |    |    |    |    |    | U |
| JS057  | 21 | 347 | 13  | 27  | 223 | 122 | 43 | 432 | 41 | 231 | 15.8 | 600 | 15 | 64 | 8  | 5  | U  |    |    |    |    |    | U |
| JS058  | 19 | 335 | 76  | 83  | 130 | 109 | 18 | 535 | 31 | 158 | 10.6 | 409 | 20 | 49 | 4  | 1  | U  |    |    |    |    |    | U |
| JS059  | 33 | 297 | 13  | 25  | 203 | 130 | 34 | 497 | 42 | 241 | 17.4 | 711 | 18 | 67 | 5  | 1  | U  |    |    |    |    |    | U |
| JS060  | 33 | 359 | 9   | 33  | 312 | 131 | 30 | 492 | 45 | 214 | 16.1 | 691 | 35 | 69 | 6  | 5  | U  |    |    |    |    |    | U |
| JS061  | 31 | 347 | 66  | 102 | 279 | 125 | 14 | 472 | 46 | 181 | 12.2 | 413 | 28 | 56 | 3  | 3  | U  |    |    |    |    |    | U |
| JS062  | 35 | 411 | 59  | 22  | 250 | 125 | 46 | 403 | 41 | 176 | 10.6 | 664 | 15 | 41 | 6  | 3  | U  |    |    |    |    |    | U |
| JS063  | 31 | 341 | 64  | 111 | 314 | 121 | 19 | 480 | 36 | 181 | 13.3 | 393 | 21 | 58 | 2  | 3  | U  |    |    |    |    |    | U |
| JS064  | 21 | 293 | 46  | 146 | 83  | 99  | 8  | 565 | 25 | 132 | 8.5  | 258 | 9  | 35 | 1  | 3  | U  |    |    |    |    |    | U |
| JS065  | 22 | 253 | 7   | 8   | 56  | 127 | 35 | 644 | 37 | 219 | 14.3 | 872 | 30 | 69 | 5  | 2  | U  |    |    |    |    |    | U |
| JS066  | 29 | 313 | 56  | 55  | 184 | 113 | 28 | 482 | 35 | 183 | 11.3 | 578 | 10 | 39 | 7  | 5  | U  |    |    |    |    |    | U |
| JS067  | 30 | 369 | 33  | 41  | 189 | 116 | 26 | 466 | 33 | 172 | 11.8 | 570 | 17 | 47 | 3  | 3  | U  |    |    |    |    |    | U |
| JS068  | 28 | 261 | 46  | 93  | 111 | 90  | 5  | 534 | 24 | 115 | 7    | 284 | 22 | 32 | 4  | 1  | U  |    |    |    |    |    | U |
| JS069  | 29 | 337 | 48  | 49  | 143 | 108 | 18 | 504 | 30 | 175 | 13.1 | 370 | 10 | 48 | 5  | 2  | U  |    |    |    |    |    | U |
| JS070  | 30 | 322 | 67  | 112 | 205 | 111 | 16 | 472 | 33 | 166 | 12.1 | 358 | 5  | 50 | 2  | 0  | U  |    |    |    |    |    | U |
| JS071  | 25 | 248 | 2   | 0   | 25  | 124 | 39 | 674 | 38 | 219 | 15   | 867 | 30 | 73 | 9  | 2  | U  |    |    |    |    |    | U |
| JS072  | 28 | 273 | 5   | 6   | 38  | 127 | 32 | 665 | 38 | 229 | 15.4 | 889 | 28 | 80 | 7  | 2  | U  |    |    |    |    |    | U |
| JS073  | 24 | 250 | 9   | 4   | 41  | 116 | 40 | 652 | 32 | 223 | 14.6 | 843 | 40 | 64 | 6  | 4  | U  |    |    |    |    |    | U |

## SUMMIT SPRINGS SECTION:

| SAMPLE  | Sc | V   | Cr  | Co  | Ni  | Cu  | Zn | Rb  | Sr | Y   | Zr   | Nb  | Mo | Ba | La | Ce | Nd | Sm | Yb | Hf | Pb | Th | U |
|---------|----|-----|-----|-----|-----|-----|----|-----|----|-----|------|-----|----|----|----|----|----|----|----|----|----|----|---|
| CR7-104 | 34 | 291 | 201 | 136 | 98  | 96  | 7  | 391 | 27 | 125 | 9.4  | 286 | 16 | 44 | 4  | 4  | U  |    |    |    |    |    | U |
| CR7-105 | 30 | 243 | 159 | 98  | 146 | 78  | 10 | 449 | 22 | 111 | 6.7  | 280 | 0  | 37 | 3  | 1  |    |    |    |    |    |    | U |
| CR7-107 | 31 | 263 | 61  | 52  | 94  | 88  | 19 | 461 | 29 | 147 | 13.4 | 438 | 11 | 45 | 2  | 7  |    |    |    |    |    |    | U |
| CR7-108 | 29 | 321 | 191 | 60  | 124 | 101 | 7  | 383 | 34 | 143 | 11   | 304 | 15 | 22 | 2  | 2  | U  |    |    |    |    |    | U |
| CR7-109 | 33 | 392 | 57  | 31  | 57  | 111 | 20 | 390 | 38 | 145 | 9    | 608 | 29 | 29 | 4  | 4  |    |    |    |    |    |    | U |
| CR7-110 | 34 | 327 | 142 | 35  | 135 | 104 | 24 | 383 | 31 | 153 | 8.9  | 526 | 24 | 44 | 4  | 2  |    |    |    |    |    |    | U |
| CR7-111 | 34 | 246 | 307 | 180 | 120 | 67  | 3  | 186 | 21 | 56  | 2.1  | 119 | 2  | 22 | 0  | 3  |    |    |    |    |    |    | U |
| CR7-112 | 39 | 239 | 289 | 173 | 103 | 71  | 1  | 185 | 22 | 55  | 0.4  | 89  | 3  | 24 | 0  | 0  |    |    |    |    |    |    | U |
| CR7-113 | 35 | 250 | 302 | 171 | 111 | 72  | 2  | 202 | 23 | 57  | 2.5  | 123 | 9  | 14 | 0  | 1  |    |    |    |    |    |    | U |
| CR7-114 | 33 | 327 | 43  | 20  | 173 | 89  | 22 | 226 | 36 | 122 | 12.2 | 434 | 13 | 22 | 3  | 2  |    |    |    |    |    |    | U |
| CR7-115 | 26 | 256 | 71  | 52  | 124 | 114 | 33 | 412 | 36 | 201 | 16.3 | 474 | 13 | 51 | 7  | 3  |    |    |    |    |    |    | U |
| CR7-116 | 32 | 294 | 23  | 10  | 47  | 113 | 50 | 346 | 34 | 179 | 12.7 | 629 | 11 | 57 | 4  | 7  |    |    |    |    |    |    | U |
| CR7-117 | 27 | 312 | 25  | 10  | 63  | 109 | 43 | 355 | 35 | 183 | 14.5 | 741 | 22 | 45 | 3  | 4  |    |    |    |    |    |    | U |
| CR7-118 | 33 | 432 | 52  | 1   | 200 | 125 | 33 | 370 | 41 | 180 | 11.2 | 671 | 21 | 37 | 4  | 3  |    |    |    |    |    |    | U |
| CR7-119 | 28 | 288 | 71  | 66  | 21  | 112 | 12 | 461 | 30 | 171 | 15.4 | 371 | 19 | 46 | 0  | 5  |    |    |    |    |    |    | U |
| CR7-120 | 34 | 320 | 100 | 24  | 40  | 114 | 14 | 411 | 31 | 169 | 13.9 | 369 | 20 | 41 | 1  | 4  |    |    |    |    |    |    | U |
| CR7-121 | 30 | 261 | 89  | 99  | 88  | 107 | 17 | 413 | 30 | 172 | 13.7 | 399 | 0  | 54 | 3  | 1  |    |    |    |    |    |    | U |
| CR7-122 | 27 | 237 | 93  | 76  | 133 | 103 | 23 | 450 | 31 | 168 | 12.3 | 439 | 11 | 39 | 1  | 1  |    |    |    |    |    |    | U |

Note: Major- and trace-element analyses are derived from X-ray Fluorescence Spectrometry at the San Diego State University Geoanalytical Lab, except for those analyses comprising the Steens Mountain section which were derived from the same method at Washington State University. These are the raw, non-normalized data, calculated on a volatile-free basis, with all iron expressed as FeO.



Age Data - Sample CR7-1

| Procedure |         | 36Ar     | 1σ       | 37Ar     | 1σ       | 38Ar     | 1σ       | 39Ar     | 1σ       | 40Ar     | 1σ       |
|-----------|---------|----------|----------|----------|----------|----------|----------|----------|----------|----------|----------|
| Blanks    |         |          |          |          |          |          |          |          |          |          |          |
| 07C878    | 500 °C  | 0.000060 | 0.000008 | 0.000023 | 0.000003 | 0.000009 | 0.000004 | 0.000039 | 0.000004 | 0.016770 | 0.000047 |
| 07C879    | 600 °C  | 0.000060 | 0.000008 | 0.000023 | 0.000003 | 0.000009 | 0.000004 | 0.000039 | 0.000004 | 0.016770 | 0.000047 |
| 07C880    | 700 °C  | 0.000060 | 0.000008 | 0.000023 | 0.000003 | 0.000009 | 0.000004 | 0.000039 | 0.000004 | 0.016770 | 0.000047 |
| 07C881    | 800 °C  | 0.000060 | 0.000008 | 0.000023 | 0.000003 | 0.000009 | 0.000004 | 0.000039 | 0.000004 | 0.016770 | 0.000047 |
| 07C882    | 900 °C  | 0.000060 | 0.000008 | 0.000023 | 0.000003 | 0.000009 | 0.000004 | 0.000039 | 0.000004 | 0.016770 | 0.000047 |
| 07C883    | 975 °C  | 0.000060 | 0.000008 | 0.000023 | 0.000003 | 0.000009 | 0.000004 | 0.000039 | 0.000004 | 0.019621 | 0.000985 |
| 07C884    | 1050 °C | 0.000068 | 0.000005 | 0.000023 | 0.000003 | 0.000009 | 0.000004 | 0.000039 | 0.000004 | 0.023346 | 0.000985 |
| 07C885    | 1125 °C | 0.000083 | 0.000005 | 0.000089 | 0.000021 | 0.000015 | 0.000004 | 0.000064 | 0.000016 | 0.027886 | 0.000985 |
| 07C886    | 1200 °C | 0.000101 | 0.000007 | 0.000333 | 0.000003 | 0.000030 | 0.000002 | 0.000180 | 0.000005 | 0.032260 | 0.000034 |
| 07C887    | 1300 °C | 0.000144 | 0.000005 | 0.000767 | 0.000021 | 0.000057 | 0.000004 | 0.000464 | 0.000016 | 0.041654 | 0.000985 |
| 07C888    | 1400 °C | 0.000196 | 0.000005 | 0.001402 | 0.000009 | 0.000096 | 0.000004 | 0.000839 | 0.000008 | 0.051515 | 0.000109 |

These calculations are all relative to the FCT-3 biotite monitor age at 28.0 Ma, and have not yet been recalculated to the new 28.201 Ma mor

| Intercept<br>Values |         | 36Ar     | 1 $\sigma$ | r2     |               | 37Ar     | 1 $\sigma$ | r2     |                |
|---------------------|---------|----------|------------|--------|---------------|----------|------------|--------|----------------|
| 07C878              | 500 °C  | 0.000505 | 0.000021   | 0.8090 | LIN # 1 2 3 4 | 0.006400 | 0.000028   | 0.9919 | LIN # 1        |
| 07C879              | 600 °C  | 0.000270 | 0.000007   | 0.4191 | LIN # 3       | 0.027058 | 0.000168   | 0.9737 | LIN #          |
| 07C880              | 700 °C  | 0.000229 | 0.000005   | 0.3811 | LIN # 3 5     | 0.092523 | 0.000243   | 0.9820 | LIN #          |
| 07C881              | 800 °C  | 0.000539 | 0.000011   | 0.1892 | LIN #         | 0.340728 | 0.000782   | 0.9850 | LIN #          |
| 07C882              | 900 °C  | 0.000627 | 0.000007   | 0.4205 | LIN # 1 3 10  | 0.417779 | 0.001245   | 0.9766 | LIN # 2        |
| 07C883              | 975 °C  | 0.000295 | 0.000010   | 0.0826 | LIN #         | 0.151812 | 0.000260   | 0.9954 | LIN # 2 4 5    |
| 07C884              | 1050 °C | 0.000274 | 0.000008   | 0.1219 | LIN #         | 0.126235 | 0.000266   | 0.9835 | LIN # 9        |
| 07C885              | 1125 °C | 0.000340 | 0.000007   | 0.5555 | LIN # 4 5     | 0.107407 | 0.000186   | 0.9898 | LIN #          |
| 07C886              | 1200 °C | 0.000235 | 0.000006   | 0.0366 | LIN #         | 0.078429 | 0.000207   | 0.9835 | LIN # 3 6      |
| 07C887              | 1300 °C | 0.000284 | 0.000009   | 0.0997 | LIN # 1       | 0.089547 | 0.000386   | 0.9667 | LIN # 3 5 8    |
| 07C888              | 1400 °C | 0.000696 | 0.000017   | 0.0935 | LIN # 1 3 4 5 | 0.327972 | 0.000400   | 0.9885 | LIN # 7 8 9 10 |

nitor age of Kuiper et al.(2008).

| 38Ar     | 1 $\sigma$ | r2     |               | 39Ar     | 1 $\sigma$ | r2     |                 |
|----------|------------|--------|---------------|----------|------------|--------|-----------------|
| 0.000376 | 0.000008   | 0.4680 | LIN # 1 2 3 4 | 0.011153 | 0.000306   | 0.1601 | LIN # 1 2 3 4   |
| 0.000205 | 0.000006   | 0.6493 | LIN # 2       | 0.010451 | 0.000059   | 0.3304 | LIN # 1 2 3 6   |
| 0.000415 | 0.000004   | 0.9093 | LIN # 4 9     | 0.031747 | 0.000032   | 0.9794 | EXP # 1 5 6     |
| 0.001452 | 0.000018   | 0.1980 | LIN # 1       | 0.113834 | 0.000083   | 0.9979 | LIN # 1 6 7 9   |
| 0.001808 | 0.000013   | 0.6044 | LIN # 1       | 0.142463 | 0.000292   | 0.9760 | LIN # 1         |
| 0.000736 | 0.000008   | 0.0027 | LIN # 1 4     | 0.058014 | 0.000145   | 0.9574 | LIN # 1 7 9     |
| 0.000480 | 0.000012   | 0.0832 | LIN #         | 0.036672 | 0.000075   | 0.9049 | LIN # 1         |
| 0.000439 | 0.000008   | 0.5548 | LIN #         | 0.032066 | 0.000116   | 0.4218 | LIN #           |
| 0.000238 | 0.000003   | 0.8584 | LIN # 7 9     | 0.015904 | 0.000009   | 0.9954 | LIN # 1 3 4 8 9 |
| 0.000204 | 0.000004   | 0.0557 | LIN # 2       | 0.012556 | 0.000031   | 0.4789 | LIN # 1 4 9 10  |
| 0.000558 | 0.000009   | 0.0737 | LIN # 3       | 0.038545 | 0.000066   | 0.9730 | LIN # 1 3 5     |

| 40Ar     | 1σ       | r2     |               | Sample<br>Parameters |         | Sample | Material    |
|----------|----------|--------|---------------|----------------------|---------|--------|-------------|
| 0.158219 | 0.001440 | 0.9114 | LIN # 1 2 3 4 | 07C878               | 500 °C  | CR7-1  | plagioclase |
| 0.131907 | 0.000735 | 0.8808 | LIN # 1 2     | 07C879               | 600 °C  | CR7-1  | plagioclase |
| 0.226525 | 0.000294 | 0.9424 | EXP # 6 7     | 07C880               | 700 °C  | CR7-1  | plagioclase |
| 0.734051 | 0.000489 | 0.9973 | LIN # 2 5     | 07C881               | 800 °C  | CR7-1  | plagioclase |
| 0.905310 | 0.000601 | 0.9973 | LIN # 1 4     | 07C882               | 900 °C  | CR7-1  | plagioclase |
| 0.386964 | 0.000430 | 0.9804 | LIN #         | 07C883               | 975 °C  | CR7-1  | plagioclase |
| 0.259955 | 0.000236 | 0.9817 | LIN # 1 2 3   | 07C884               | 1050 °C | CR7-1  | plagioclase |
| 0.259904 | 0.000271 | 0.9729 | LIN # 1 4 5   | 07C885               | 1125 °C | CR7-1  | plagioclase |
| 0.139698 | 0.000230 | 0.6318 | LIN # 1 2 6 7 | 07C886               | 1200 °C | CR7-1  | plagioclase |
| 0.127389 | 0.000128 | 0.9564 | LIN # 1 2 4   | 07C887               | 1300 °C | CR7-1  | plagioclase |
| 0.323066 | 0.000355 | 0.9782 | LIN # 4 7 10  | 07C888               | 1400 °C | CR7-1  | plagioclase |

| Location | Analyst | Temp | Standard<br>(in Ma) | %1 $\sigma$ | J        | %1 $\sigma$ |
|----------|---------|------|---------------------|-------------|----------|-------------|
| OR       | jh      | 500  | 28.03               | 0.01        | 0.001508 | 0.35        |
| OR       | jh      | 600  | 28.03               | 0.01        | 0.001508 | 0.35        |
| OR       | jh      | 700  | 28.03               | 0.01        | 0.001508 | 0.35        |
| OR       | jh      | 800  | 28.03               | 0.01        | 0.001508 | 0.35        |
| OR       | jh      | 900  | 28.03               | 0.01        | 0.001508 | 0.35        |
| OR       | jh      | 975  | 28.03               | 0.01        | 0.001508 | 0.35        |
| OR       | jh      | 1050 | 28.03               | 0.01        | 0.001508 | 0.35        |
| OR       | jh      | 1125 | 28.03               | 0.01        | 0.001508 | 0.35        |
| OR       | jh      | 1200 | 28.03               | 0.01        | 0.001508 | 0.35        |
| OR       | jh      | 1300 | 28.03               | 0.01        | 0.001508 | 0.35        |
| OR       | jh      | 1400 | 28.03               | 0.01        | 0.001508 | 0.35        |



| MDF     | %1 $\sigma$ | Volume Ratio | Sensitivity (mol/vol) | Day | Month | Year | Hour | Min | Resist | Irradiation | Project | Standard Name | Irradiation Constants |
|---------|-------------|--------------|-----------------------|-----|-------|------|------|-----|--------|-------------|---------|---------------|-----------------------|
| 1.00378 | 0.16        | 1.0148       | 1.012E-19             | 28  | 02    | 2007 | 16   | 24  | 001    | OSU4E06     | Camp    | FCT-3         | 07C878                |
| 1.00378 | 0.16        | 1.0147       | 1.012E-19             | 28  | 02    | 2007 | 16   | 55  | 001    | OSU4E06     | Camp    | FCT-3         | 07C879                |
| 1.00378 | 0.16        | 1.0147       | 1.012E-19             | 28  | 02    | 2007 | 17   | 26  | 001    | OSU4E06     | Camp    | FCT-3         | 07C880                |
| 1.00378 | 0.16        | 1.0146       | 1.012E-19             | 28  | 02    | 2007 | 17   | 56  | 001    | OSU4E06     | Camp    | FCT-3         | 07C881                |
| 1.00378 | 0.16        | 1.0146       | 1.012E-19             | 28  | 02    | 2007 | 18   | 28  | 001    | OSU4E06     | Camp    | FCT-3         | 07C882                |
| 1.00378 | 0.16        | 1.015        | 1.012E-19             | 28  | 02    | 2007 | 18   | 59  | 001    | OSU4E06     | Camp    | FCT-3         | 07C883                |
| 1.00378 | 0.16        | 1.0156       | 1.012E-19             | 28  | 02    | 2007 | 19   | 31  | 001    | OSU4E06     | Camp    | FCT-3         | 07C884                |
| 1.00378 | 0.16        | 1.0159       | 1.012E-19             | 28  | 02    | 2007 | 20   | 02  | 001    | OSU4E06     | Camp    | FCT-3         | 07C885                |
| 1.00378 | 0.16        | 1.016        | 1.012E-19             | 28  | 02    | 2007 | 20   | 34  | 001    | OSU4E06     | Camp    | FCT-3         | 07C886                |
| 1.00378 | 0.16        | 1.0155       | 1.012E-19             | 01  | 03    | 2007 | 09   | 48  | 001    | OSU4E06     | Camp    | FCT-3         | 07C887                |
| 1.00378 | 0.16        | 1.0152       | 1.012E-19             | 01  | 03    | 2007 | 10   | 13  | 001    | OSU4E06     | Camp    | FCT-3         | 07C888                |

|         | 40/36(a) | %1σ | 40/36(c) | %1σ | 38/36(a) | %1σ | 38/36(c) | %1σ | 39/37(ca) | %1σ | 38/37(ca) | %1σ | 36/37(ca) | %1σ |
|---------|----------|-----|----------|-----|----------|-----|----------|-----|-----------|-----|-----------|-----|-----------|-----|
| 500 °C  | 295.5    | 0   | 0.018    | 35  | 0.1869   | 0   | 1.493    | 3   | 0.000673  | 0   | 0.000139  | 0   | 0.000264  | 0   |
| 600 °C  | 295.5    | 0   | 0.018    | 35  | 0.1869   | 0   | 1.493    | 3   | 0.000673  | 0   | 0.000139  | 0   | 0.000264  | 0   |
| 700 °C  | 295.5    | 0   | 0.018    | 35  | 0.1869   | 0   | 1.493    | 3   | 0.000673  | 0   | 0.000139  | 0   | 0.000264  | 0   |
| 800 °C  | 295.5    | 0   | 0.018    | 35  | 0.1869   | 0   | 1.493    | 3   | 0.000673  | 0   | 0.000139  | 0   | 0.000264  | 0   |
| 900 °C  | 295.5    | 0   | 0.018    | 35  | 0.1869   | 0   | 1.493    | 3   | 0.000673  | 0   | 0.000139  | 0   | 0.000264  | 0   |
| 975 °C  | 295.5    | 0   | 0.018    | 35  | 0.1869   | 0   | 1.493    | 3   | 0.000673  | 0   | 0.000139  | 0   | 0.000264  | 0   |
| 1050 °C | 295.5    | 0   | 0.018    | 35  | 0.1869   | 0   | 1.493    | 3   | 0.000673  | 0   | 0.000139  | 0   | 0.000264  | 0   |
| 1125 °C | 295.5    | 0   | 0.018    | 35  | 0.1869   | 0   | 1.493    | 3   | 0.000673  | 0   | 0.000139  | 0   | 0.000264  | 0   |
| 1200 °C | 295.5    | 0   | 0.018    | 35  | 0.1869   | 0   | 1.493    | 3   | 0.000673  | 0   | 0.000139  | 0   | 0.000264  | 0   |
| 1300 °C | 295.5    | 0   | 0.018    | 35  | 0.1869   | 0   | 1.493    | 3   | 0.000673  | 0   | 0.000139  | 0   | 0.000264  | 0   |
| 1400 °C | 295.5    | 0   | 0.018    | 35  | 0.1869   | 0   | 1.493    | 3   | 0.000673  | 0   | 0.000139  | 0   | 0.000264  | 0   |

| 40/39(k) | %1σ | 38/39(k) | %1σ | 36/38(cl) | %1σ | K/Ca | %1σ | K/Cl | %1σ | Ca/Cl | %1σ |
|----------|-----|----------|-----|-----------|-----|------|-----|------|-----|-------|-----|
| 0.00101  | 0   | 0.01138  | 0   | 0         | 0   | 0.43 | 0   | 0    | 0   | 0     | 0   |
| 0.00101  | 0   | 0.01138  | 0   | 0         | 0   | 0.43 | 0   | 0    | 0   | 0     | 0   |
| 0.00101  | 0   | 0.01138  | 0   | 0         | 0   | 0.43 | 0   | 0    | 0   | 0     | 0   |
| 0.00101  | 0   | 0.01138  | 0   | 0         | 0   | 0.43 | 0   | 0    | 0   | 0     | 0   |
| 0.00101  | 0   | 0.01138  | 0   | 0         | 0   | 0.43 | 0   | 0    | 0   | 0     | 0   |
| 0.00101  | 0   | 0.01138  | 0   | 0         | 0   | 0.43 | 0   | 0    | 0   | 0     | 0   |
| 0.00101  | 0   | 0.01138  | 0   | 0         | 0   | 0.43 | 0   | 0    | 0   | 0     | 0   |
| 0.00101  | 0   | 0.01138  | 0   | 0         | 0   | 0.43 | 0   | 0    | 0   | 0     | 0   |
| 0.00101  | 0   | 0.01138  | 0   | 0         | 0   | 0.43 | 0   | 0    | 0   | 0     | 0   |
| 0.00101  | 0   | 0.01138  | 0   | 0         | 0   | 0.43 | 0   | 0    | 0   | 0     | 0   |
| 0.00101  | 0   | 0.01138  | 0   | 0         | 0   | 0.43 | 0   | 0    | 0   | 0     | 0   |
| 0.00101  | 0   | 0.01138  | 0   | 0         | 0   | 0.43 | 0   | 0    | 0   | 0     | 0   |
| 0.00101  | 0   | 0.01138  | 0   | 0         | 0   | 0.43 | 0   | 0    | 0   | 0     | 0   |
| 0.00101  | 0   | 0.01138  | 0   | 0         | 0   | 0.43 | 0   | 0    | 0   | 0     | 0   |

#### Incremental Heating

|        |         |   |
|--------|---------|---|
| 07C878 | 500 °C  |   |
| 07C879 | 600 °C  | ✓ |
| 07C880 | 700 °C  | ✓ |
| 07C881 | 800 °C  | ✓ |
| 07C882 | 900 °C  | ✓ |
| 07C883 | 975 °C  | ✓ |
| 07C884 | 1050 °C | ✓ |
| 07C885 | 1125 °C | ✓ |
| 07C886 | 1200 °C | ✓ |
| 07C887 | 1300 °C | ✓ |
| 07C888 | 1400 °C | ✓ |

Σ

#### Information on Analysis

CR7-1  
plagioclase  
OR  
jh

Project = Camp  
Irradiation = OSU4E06  
J = 0.0015080 ± 0.0000053  
FCT-3 = 28.030 ± 0.003 Ma

| 36Ar(a)  | 37Ar(ca) | 38Ar(cl) | 39Ar(k)  | 40Ar(r)  | Age $\pm 2\sigma$<br>(Ma) | 40Ar(r)<br>(%) | 39Ar(k)<br>(%) | K/Ca $\pm 2\sigma$ | Normal<br>Isochron |
|----------|----------|----------|----------|----------|---------------------------|----------------|----------------|--------------------|--------------------|
| 0.000439 | 0.025075 | 0.000156 | 0.011226 | 0.013951 | 3.38 $\pm$ 3.34           | 9.70           | 2.23           | 0.192 $\pm$ 0.012  | 07C878 500 °C      |
| 0.000183 | 0.106333 | 0.000029 | 0.010460 | 0.063074 | 16.33 $\pm$ 1.63          | 53.87          | 2.08           | 0.042 $\pm$ 0.001  | 07C879 600 °C      |
| 0.000074 | 0.363967 | 0.000000 | 0.031824 | 0.191132 | 16.27 $\pm$ 0.48          | 89.70          | 6.33           | 0.038 $\pm$ 0.001  | 07C880 700 °C      |
| 0.000126 | 1.341018 | 0.000000 | 0.114176 | 0.690662 | 16.38 $\pm$ 0.21          | 94.87          | 22.71          | 0.037 $\pm$ 0.001  | 07C881 800 °C      |
| 0.000133 | 1.645013 | 0.000000 | 0.142924 | 0.862225 | 16.34 $\pm$ 0.17          | 95.62          | 28.43          | 0.037 $\pm$ 0.001  | 07C882 900 °C      |
| 0.000078 | 0.598198 | 0.000000 | 0.058250 | 0.349978 | 16.27 $\pm$ 0.38          | 93.79          | 11.59          | 0.042 $\pm$ 0.001  | 07C883 975 °C      |
| 0.000076 | 0.497910 | 0.000000 | 0.036749 | 0.218184 | 16.08 $\pm$ 0.45          | 90.66          | 7.31           | 0.032 $\pm$ 0.001  | 07C884 1050 °C     |
| 0.000147 | 0.423682 | 0.000000 | 0.032120 | 0.192674 | 16.25 $\pm$ 0.49          | 81.59          | 6.39           | 0.033 $\pm$ 0.001  | 07C885 1125 °C     |
| 0.000054 | 0.308500 | 0.000000 | 0.015719 | 0.093620 | 16.13 $\pm$ 0.97          | 85.36          | 3.13           | 0.022 $\pm$ 0.001  | 07C886 1200 °C     |
| 0.000049 | 0.354390 | 0.000000 | 0.012008 | 0.073188 | 16.51 $\pm$ 1.43          | 83.44          | 2.39           | 0.015 $\pm$ 0.000  | 07C887 1300 °C     |
| 0.000159 | 1.303578 | 0.000000 | 0.037289 | 0.229438 | 16.66 $\pm$ 0.81          | 82.99          | 7.42           | 0.012 $\pm$ 0.000  | 07C888 1400 °C     |

0.001519 6.967664 0.000185 0.502744 2.978125

| Results          | 40(r)/39(k) $\pm 2\sigma$          | Age $\pm 2\sigma$<br>(Ma)                                                                   | MSWD                   | 39Ar(k)<br>(%,n)                                          | K/Ca $\pm 2\sigma$ | Results        |
|------------------|------------------------------------|---------------------------------------------------------------------------------------------|------------------------|-----------------------------------------------------------|--------------------|----------------|
| Weighted Plateau | 6.0277 $\pm$ 0.0412<br>$\pm$ 0.68% | 16.32 $\pm$ 0.16<br>$\pm$ 0.97%<br>External Error $\pm$ 0.30<br>Analytical Error $\pm$ 0.11 | 0.30<br>2.26<br>1.0000 | 97.77<br>10<br>Statistical T Ratio<br>Error Magnification | 0.021 $\pm$ 0.007  | No Convergence |
| Total Fusion Age | 5.9237 $\pm$ 0.0553<br>$\pm$ 0.93% | 16.04 $\pm$ 0.19<br>$\pm$ 1.16%<br>External Error $\pm$ 0.32<br>Analytical Error $\pm$ 0.15 |                        | 11                                                        | 0.001 $\pm$ 0.000  | Statistics     |

| 39(k)/36(a) ± 2σ |                | 40(a+r)/36(a) ± 2σ | r.i.   | Inverse Isochron |         | 39(k)/40(a+r) ± 2σ |                     |
|------------------|----------------|--------------------|--------|------------------|---------|--------------------|---------------------|
| ✓                | 25.6 ± 3.0     | 327.3 ± 34.6       | 0.8665 | 07C878           | 500 °C  |                    | 0.078075 ± 0.004591 |
| ✓                | 57.2 ± 6.5     | 640.7 ± 72.9       | 0.9883 | 07C879           | 600 °C  | ✓                  | 0.089352 ± 0.001557 |
| ✓                | 429.0 ± 110.5  | 2872.2 ± 739.5     | 0.9998 | 07C880           | 700 °C  | ✓                  | 0.149373 ± 0.000710 |
| ✓                | 906.5 ± 209.5  | 5778.7 ± 1335.7    | 0.9999 | 07C881           | 800 °C  | ✓                  | 0.156861 ± 0.000597 |
| ✓                | 1072.3 ± 207.2 | 6764.3 ± 1306.6    | 0.9996 | 07C882           | 900 °C  | ✓                  | 0.158520 ± 0.000859 |
| ✓                | 744.8 ± 249.0  | 4770.5 ± 1595.0    | 0.9997 | 07C883           | 975 °C  | ✓                  | 0.156130 ± 0.001297 |
| ✓                | 483.8 ± 121.9  | 3168.2 ± 798.3     | 0.9992 | 07C884           | 1050 °C | ✓                  | 0.152719 ± 0.001515 |
| ✓                | 218.5 ± 26.2   | 1606.1 ± 192.6     | 0.9951 | 07C885           | 1125 °C | ✓                  | 0.136033 ± 0.001612 |
| ✓                | 289.6 ± 102.1  | 2020.5 ± 712.3     | 0.9999 | 07C886           | 1200 °C | ✓                  | 0.143347 ± 0.000800 |
| ✓                | 244.6 ± 101.6  | 1786.0 ± 742.8     | 0.9984 | 07C887           | 1300 °C | ✓                  | 0.136929 ± 0.003236 |
| ✓                | 234.5 ± 55.5   | 1738.5 ± 411.3     | 0.9997 | 07C888           | 1400 °C | ✓                  | 0.134897 ± 0.000757 |

| 40(a)/36(a) ± 2σ              |  | 40(r)/39(k) ± 2σ           |  | Age ± 2σ<br>(Ma)                                 | MSWD | Results    | 40(a)/36(a) ± 2σ              |  |
|-------------------------------|--|----------------------------|--|--------------------------------------------------|------|------------|-------------------------------|--|
|                               |  |                            |  |                                                  |      |            |                               |  |
| 292.7619 ± 28.1612<br>± 9.62% |  | 6.0272 ± 0.0606<br>± 1.01% |  | 16.32 ± 0.20<br>± 1.22%                          | 0.35 | Isochron   | 294.2452 ± 28.0678<br>± 9.54% |  |
|                               |  |                            |  | External Error ± 0.33<br>Analytical Error ± 0.16 |      |            |                               |  |
|                               |  |                            |  |                                                  |      |            |                               |  |
| Statistical F Ratio           |  | Convergence                |  | 0.0000016720                                     |      | Statistics | Statistical F Ratio           |  |
| Error Magnification           |  | Number of Iterations       |  | 500                                              |      |            | Error Magnification           |  |
| n                             |  | Calculated Line            |  | Weighted York-2                                  |      |            | n                             |  |
| 1.94                          |  | 1.0000                     |  | 10                                               |      |            | 1.94                          |  |
|                               |  |                            |  |                                                  |      |            |                               |  |
|                               |  |                            |  |                                                  |      |            |                               |  |



| 36(a)/40(a+r) $\pm 2\sigma$ | r.i.   | Degassing<br>Patterns |           | 36Ar(a)  | 36Ar(c)  | 36Ar(ca) | 36Ar(cl) |
|-----------------------------|--------|-----------------------|-----------|----------|----------|----------|----------|
| 0.003056 $\pm$ 0.000323     | 0.0666 | 07C878                | 500 °C    | 0.000439 | 0.000000 | 0.000007 | 0.000000 |
| 0.001561 $\pm$ 0.000178     | 0.0823 | 07C879                | 600 °C ✓  | 0.000183 | 0.000000 | 0.000028 | 0.000000 |
| 0.000348 $\pm$ 0.000090     | 0.0066 | 07C880                | 700 °C ✓  | 0.000074 | 0.000000 | 0.000096 | 0.000000 |
| 0.000173 $\pm$ 0.000040     | 0.0021 | 07C881                | 800 °C ✓  | 0.000126 | 0.000000 | 0.000354 | 0.000000 |
| 0.000148 $\pm$ 0.000029     | 0.0018 | 07C882                | 900 °C ✓  | 0.000133 | 0.000000 | 0.000434 | 0.000000 |
| 0.000210 $\pm$ 0.000070     | 0.0120 | 07C883                | 975 °C ✓  | 0.000078 | 0.000000 | 0.000158 | 0.000000 |
| 0.000316 $\pm$ 0.000080     | 0.0284 | 07C884                | 1050 °C ✓ | 0.000076 | 0.000000 | 0.000131 | 0.000000 |
| 0.000623 $\pm$ 0.000075     | 0.0528 | 07C885                | 1125 °C ✓ | 0.000147 | 0.000000 | 0.000112 | 0.000000 |
| 0.000495 $\pm$ 0.000174     | 0.0094 | 07C886                | 1200 °C ✓ | 0.000054 | 0.000000 | 0.000081 | 0.000000 |
| 0.000560 $\pm$ 0.000233     | 0.0522 | 07C887                | 1300 °C ✓ | 0.000049 | 0.000000 | 0.000094 | 0.000000 |
| 0.000575 $\pm$ 0.000136     | 0.0056 | 07C888                | 1400 °C ✓ | 0.000159 | 0.000000 | 0.000344 | 0.000000 |
|                             |        | $\Sigma$              |           | 0.001519 | 0.000000 | 0.001839 | 0.000000 |
|                             |        | $\Sigma$              |           |          |          |          | 0.003359 |

  

| 40(r)/39(k) $\pm 2\sigma$          | Age $\pm 2\sigma$<br>(Ma)       | MSWD |
|------------------------------------|---------------------------------|------|
| 6.0297 $\pm$ 0.0595<br>$\pm$ 0.99% | 16.33 $\pm$ 0.20<br>$\pm$ 1.20% | 0.33 |
| External Error $\pm$ 0.33          |                                 |      |
| Analytical Error $\pm$ 0.16        |                                 |      |
| Convergence                        | 0.0000000565                    |      |
| Number of Iterations               | 5                               |      |
| Calculated Line                    | Weighted York-2                 |      |

| 37Ar(ca) | 38Ar(a)  | 38Ar(c)  | 38Ar(k)  | 38Ar(ca) | 38Ar(cl) | 39Ar(k)  | 39Ar(ca) | 40Ar(r)  | 40Ar(a)  | 40Ar(c)  |
|----------|----------|----------|----------|----------|----------|----------|----------|----------|----------|----------|
| 0.025075 | 0.000082 | 0.000000 | 0.000128 | 0.000003 | 0.000156 | 0.011226 | 0.000017 | 0.013951 | 0.129828 | 0.000000 |
| 0.106333 | 0.000034 | 0.000000 | 0.000119 | 0.000015 | 0.000029 | 0.010460 | 0.000072 | 0.063074 | 0.053991 | 0.000000 |
| 0.363967 | 0.000014 | 0.000000 | 0.000362 | 0.000051 | 0.000000 | 0.031824 | 0.000245 | 0.191132 | 0.021920 | 0.000000 |
| 1.341018 | 0.000024 | 0.000000 | 0.001299 | 0.000186 | 0.000000 | 0.114176 | 0.000903 | 0.690662 | 0.037221 | 0.000000 |
| 1.645013 | 0.000025 | 0.000000 | 0.001626 | 0.000229 | 0.000000 | 0.142924 | 0.001107 | 0.862225 | 0.039387 | 0.000000 |
| 0.598198 | 0.000015 | 0.000000 | 0.000663 | 0.000083 | 0.000000 | 0.058250 | 0.000403 | 0.349978 | 0.023110 | 0.000000 |
| 0.497910 | 0.000014 | 0.000000 | 0.000418 | 0.000069 | 0.000000 | 0.036749 | 0.000335 | 0.218184 | 0.022443 | 0.000000 |
| 0.423682 | 0.000027 | 0.000000 | 0.000366 | 0.000059 | 0.000000 | 0.032120 | 0.000285 | 0.192674 | 0.043443 | 0.000000 |
| 0.308500 | 0.000010 | 0.000000 | 0.000179 | 0.000043 | 0.000000 | 0.015719 | 0.000208 | 0.093620 | 0.016038 | 0.000000 |
| 0.354390 | 0.000009 | 0.000000 | 0.000137 | 0.000049 | 0.000000 | 0.012008 | 0.000239 | 0.073188 | 0.014510 | 0.000000 |
| 1.303578 | 0.000030 | 0.000000 | 0.000424 | 0.000181 | 0.000000 | 0.037289 | 0.000877 | 0.229438 | 0.046986 | 0.000000 |
| 6.967664 | 0.000284 | 0.000000 | 0.005721 | 0.000969 | 0.000185 | 0.502744 | 0.004689 | 2.978125 | 0.448877 | 0.000000 |
| 6.967664 |          |          |          |          | 0.007159 |          | 0.507434 |          |          |          |

| 40Ar(k)  | Additional Parameters |           | 40(r)/39(k) | 1 $\sigma$ | 40(r+a) | 1 $\sigma$ | 40Ar/39Ar | 1 $\sigma$ | 37Ar/39Ar | 1 $\sigma$ |
|----------|-----------------------|-----------|-------------|------------|---------|------------|-----------|------------|-----------|------------|
| 0.000011 | 07C878                | 500 °C    | 1.242756    | 0.61506    | 0.14378 | 0.00146    | 12.78999  | 0.37557    | 2.23042   | 0.07008    |
| 0.000011 | 07C879                | 600 °C ✓  | 6.030002    | 0.30251    | 0.11707 | 0.00075    | 11.11669  | 0.09657    | 10.09666  | 0.16976    |
| 0.000032 | 07C880                | 700 °C ✓  | 6.005885    | 0.08990    | 0.21305 | 0.00030    | 6.64452   | 0.01569    | 11.34946  | 0.16831    |
| 0.000115 | 07C881                | 800 °C ✓  | 6.049084    | 0.03942    | 0.72788 | 0.00050    | 6.32608   | 0.01194    | 11.65304  | 0.17202    |
| 0.000144 | 07C882                | 900 °C ✓  | 6.032765    | 0.03125    | 0.90161 | 0.00061    | 6.26086   | 0.01682    | 11.42126  | 0.17143    |
| 0.000059 | 07C883                | 975 °C ✓  | 6.008178    | 0.07114    | 0.37309 | 0.00108    | 6.36196   | 0.02632    | 10.19897  | 0.15179    |
| 0.000037 | 07C884                | 1050 °C ✓ | 5.937227    | 0.08316    | 0.24063 | 0.00101    | 6.48979   | 0.03210    | 13.42668  | 0.19964    |
| 0.000032 | 07C885                | 1125 °C ✓ | 5.998609    | 0.09023    | 0.23612 | 0.00102    | 7.28746   | 0.04298    | 13.07460  | 0.19791    |
| 0.000016 | 07C886                | 1200 °C ✓ | 5.955819    | 0.18077    | 0.10966 | 0.00024    | 6.88614   | 0.01907    | 19.37001  | 0.28743    |
| 0.000012 | 07C887                | 1300 °C ✓ | 6.094752    | 0.26497    | 0.08770 | 0.00099    | 7.16181   | 0.08445    | 28.93719  | 0.45106    |
| 0.000038 | 07C888                | 1400 °C ✓ | 6.152984    | 0.15014    | 0.27642 | 0.00038    | 7.24362   | 0.01983    | 34.15533  | 0.50703    |
| 0.000508 |                       |           |             |            |         |            |           |            |           |            |
| 3.427510 |                       |           |             |            |         |            |           |            |           |            |

| 36Ar/39Ar | 1 $\sigma$ | 37Ar<br>(decay) | 39Ar<br>(decay) | 40Ar<br>(moles) |
|-----------|------------|-----------------|-----------------|-----------------|
| 0.03967   | 0.00230    | 3.91840696      | 1.00048798      | 1.455E-20       |
| 0.02001   | 0.00099    | 3.92007349      | 1.00048813      | 1.185E-20       |
| 0.00531   | 0.00029    | 3.92174072      | 1.00048829      | 2.156E-20       |
| 0.00417   | 0.00012    | 3.92335485      | 1.00048843      | 7.367E-20       |
| 0.00394   | 0.00008    | 3.92507732      | 1.00048859      | 9.126E-20       |
| 0.00403   | 0.00022    | 3.92674668      | 1.00048874      | 3.776E-20       |
| 0.00559   | 0.00025    | 3.92847064      | 1.00048890      | 2.436E-20       |
| 0.00799   | 0.00027    | 3.93014145      | 1.00048905      | 2.390E-20       |
| 0.00852   | 0.00060    | 3.93186690      | 1.00048921      | 1.110E-20       |
| 0.01165   | 0.00083    | 3.97492303      | 1.00049310      | 8.876E-21       |
| 0.01318   | 0.00048    | 3.97628633      | 1.00049322      | 2.798E-20       |

07C878.AGE >>> CR7-1 >>> CAMP PROJECT

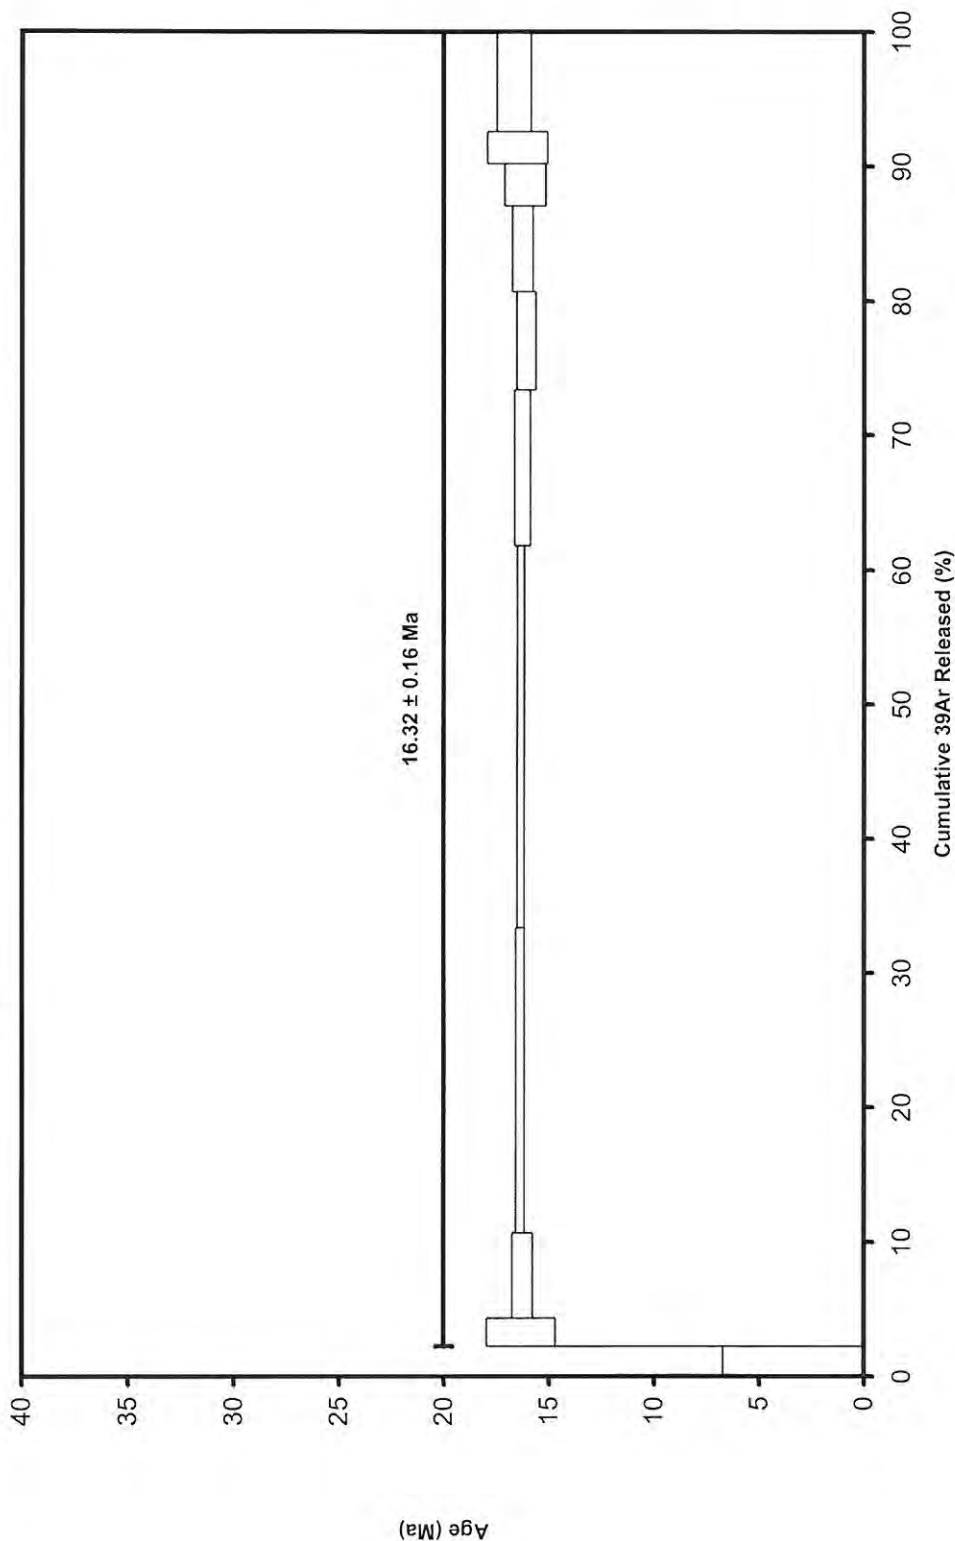

DR2013250 Camp

07C878.AGE >>> CR7-1 >>> CAMP PROJECT

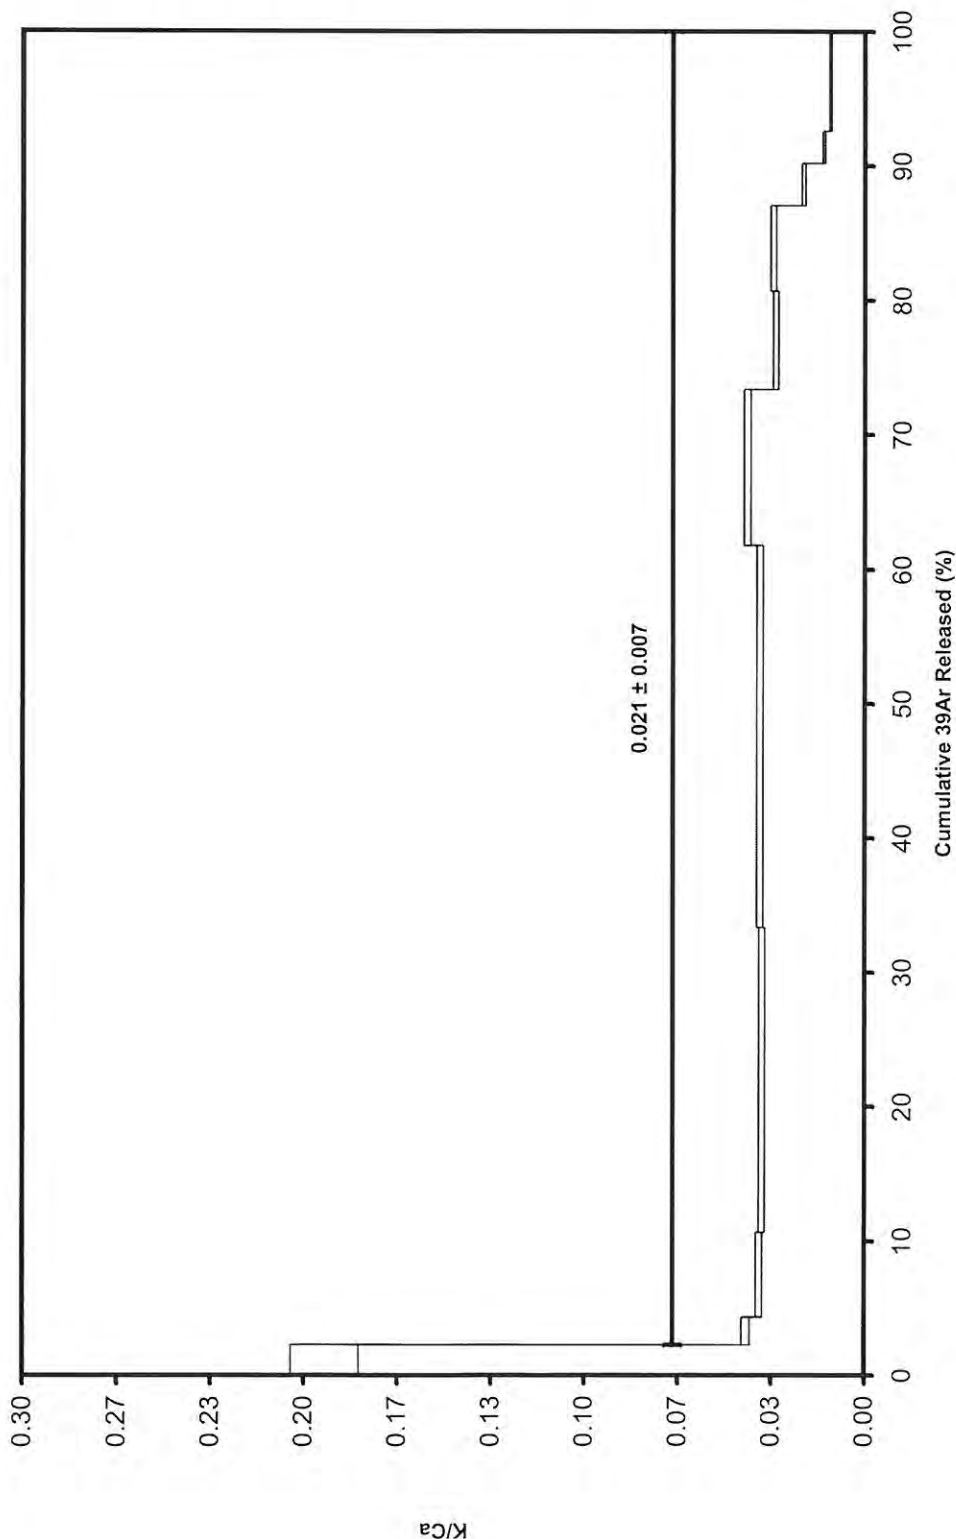

**Ar-Ages in Ma**  
**WEIGHTED PLATEAU**  
 16.32 ± 0.16  
**TOTAL FUSION**  
 16.04 ± 0.19  
**NORMAL ISOCHRON**  
 16.32 ± 0.20  
**INVERSE ISOCHRON**  
 16.33 ± 0.20

**Sample Info**  
 plagioclase  
 OR  
 jh  
 IRR = OSU4E06  
 J = 0.0015080 ±

DR2013250 Camp

07C878.AGE >>> CR7-1 >>> CAMP PROJECT

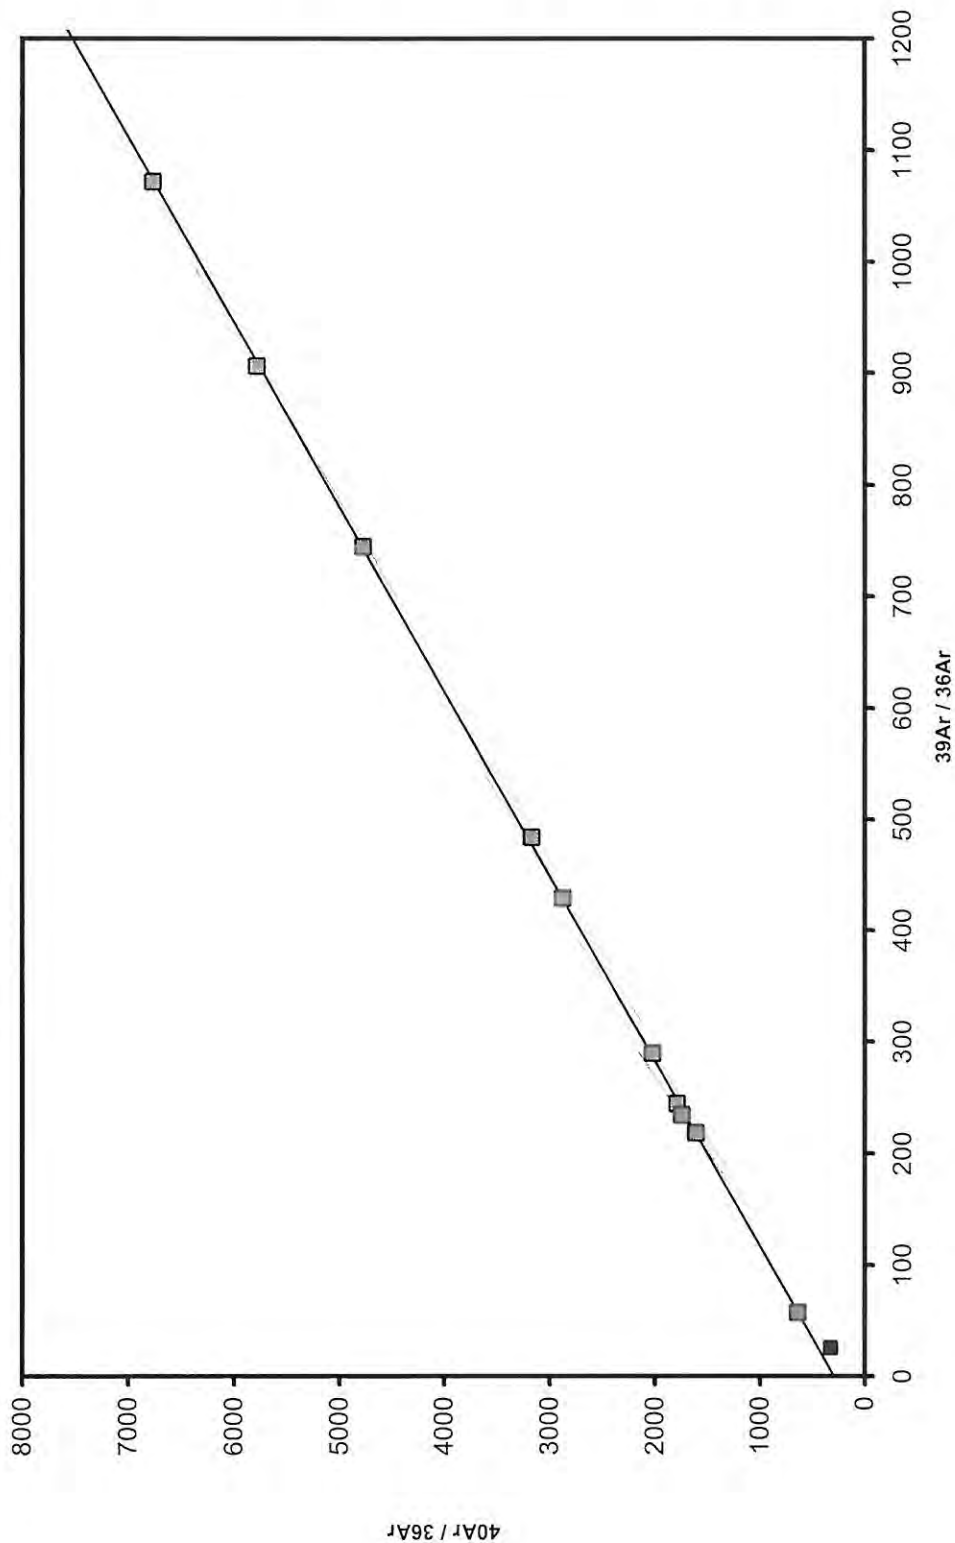

| Ar-Ages in Ma    |              |
|------------------|--------------|
| WEIGHTED PLATEAU | 16.32 ± 0.16 |
| TOTAL FUSION     | 16.04 ± 0.19 |
| NORMAL ISOCHRON  | 16.32 ± 0.20 |
| INVERSE ISOCHRON | 16.33 ± 0.20 |
| MSWD             | 0.35         |

| Sample Info             |  |
|-------------------------|--|
| plagioclase<br>OR<br>jh |  |
| IRR = OSU4E06           |  |
| J = 0.0015080 ±         |  |

DR2013250 Camp

07C878.AGE >>> CR7-1 >>> CAMP PROJECT

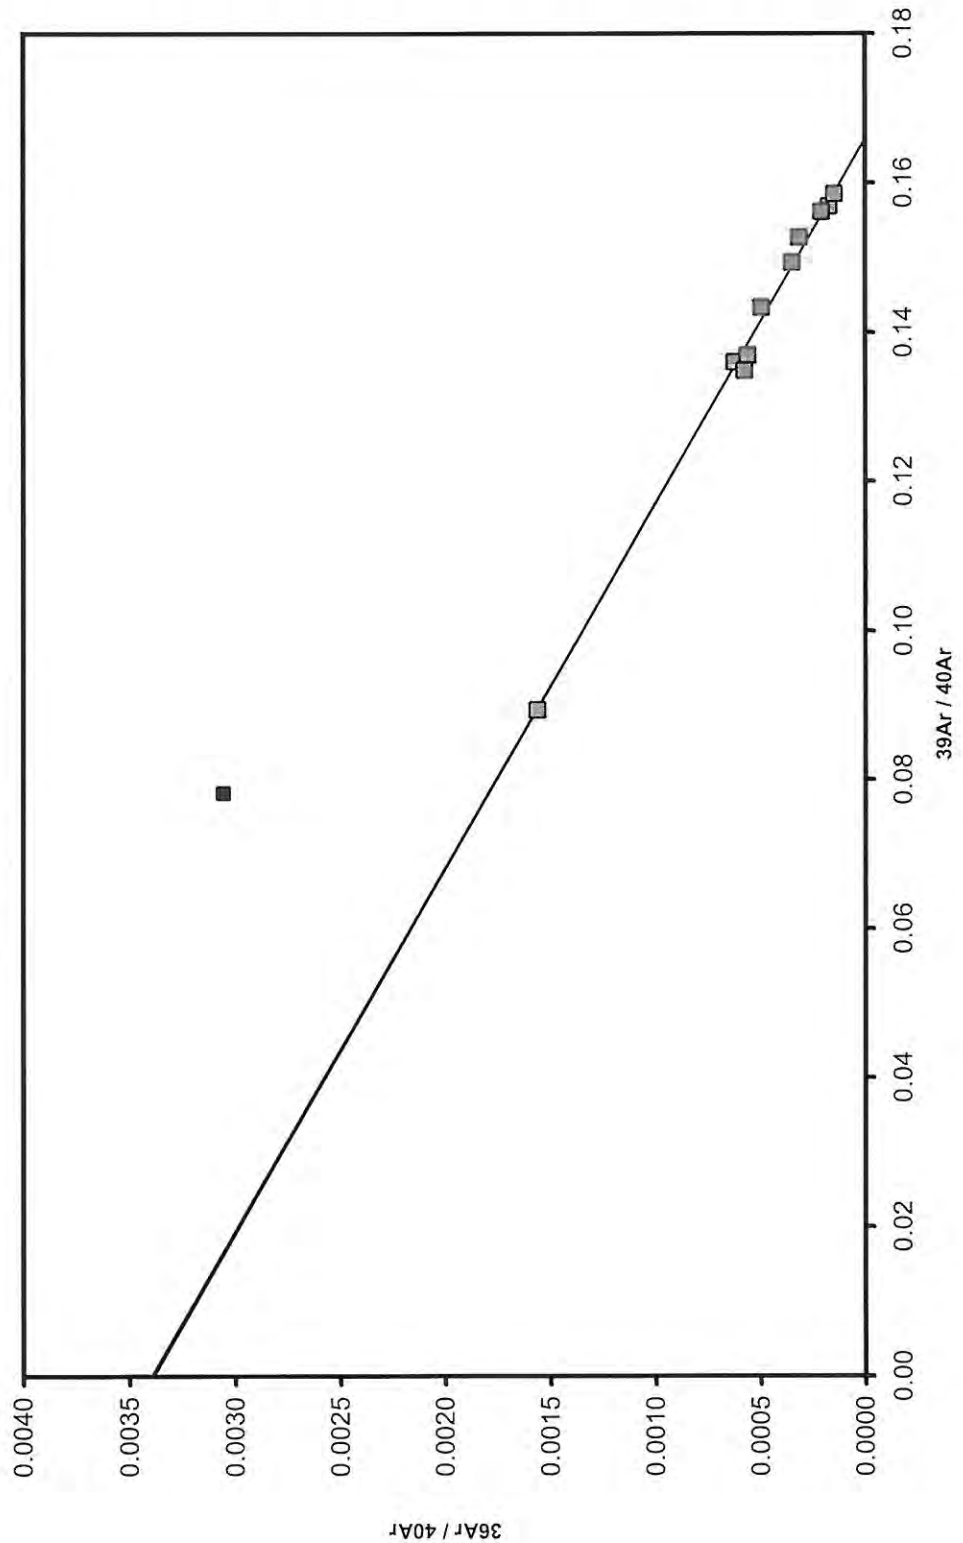

| Ar-Ages in Ma    |              |
|------------------|--------------|
| WEIGHTED PLATEAU | 16.32 ± 0.16 |
| TOTAL FUSION     | 16.04 ± 0.19 |
| NORMAL ISOCHRON  | 16.32 ± 0.20 |
| INVERSE ISOCHRON | 16.33 ± 0.20 |
| MSWD             | 0.33         |

| Sample Info |  |
|-------------|--|
| plagioclase |  |
| OR          |  |
| jh          |  |

  

|                 |
|-----------------|
| IRR = OSU4E06   |
| J = 0.0015080 ± |

DR2013250 Camp



Age Data - Sample CR-358

| Procedure |         | 36Ar     | 1σ       | 37Ar     | 1σ       | 38Ar     | 1σ       | 39Ar     | 1σ       | 40Ar     | 1σ       |
|-----------|---------|----------|----------|----------|----------|----------|----------|----------|----------|----------|----------|
| Blanks    |         |          |          |          |          |          |          |          |          |          |          |
| 10C429    | 400 °C  | 0.000267 | 0.000005 | 0.000004 | 0.000001 | 0.000013 | 0.000003 | 0.000029 | 0.000005 | 0.001072 | 0.000012 |
| 10C430    | 500 °C  | 0.000268 | 0.000006 | 0.000010 | 0.000020 | 0.000010 | 0.000003 | 0.000027 | 0.000003 | 0.001095 | 0.000022 |
| 10C431    | 600 °C  | 0.000268 | 0.000006 | 0.000013 | 0.000020 | 0.000009 | 0.000003 | 0.000026 | 0.000003 | 0.001108 | 0.000022 |
| 10C433    | 700 °C  | 0.000268 | 0.000006 | 0.000022 | 0.000020 | 0.000007 | 0.000003 | 0.000025 | 0.000003 | 0.001127 | 0.000022 |
| 10C434    | 800 °C  | 0.000268 | 0.000006 | 0.000029 | 0.000020 | 0.000007 | 0.000003 | 0.000025 | 0.000003 | 0.001134 | 0.000022 |
| 10C435    | 900 °C  | 0.000268 | 0.000006 | 0.000037 | 0.000020 | 0.000007 | 0.000003 | 0.000026 | 0.000003 | 0.001139 | 0.000022 |
| 10C437    | 975 °C  | 0.000270 | 0.000006 | 0.000059 | 0.000020 | 0.000009 | 0.000003 | 0.000028 | 0.000003 | 0.001145 | 0.000022 |
| 10C438    | 1050 °C | 0.000271 | 0.000006 | 0.000071 | 0.000020 | 0.000010 | 0.000003 | 0.000030 | 0.000003 | 0.001145 | 0.000022 |
| 10C439    | 1125 °C | 0.000272 | 0.000006 | 0.000084 | 0.000020 | 0.000011 | 0.000003 | 0.000032 | 0.000003 | 0.001144 | 0.000022 |
| 10C440    | 1200 °C | 0.000273 | 0.000006 | 0.000100 | 0.000020 | 0.000013 | 0.000003 | 0.000034 | 0.000003 | 0.001140 | 0.000022 |
| 10C442    | 1300 °C | 0.000276 | 0.000006 | 0.000135 | 0.000020 | 0.000018 | 0.000003 | 0.000040 | 0.000003 | 0.001129 | 0.000022 |
| 10C443    | 1400 °C | 0.000276 | 0.000004 | 0.000120 | 0.000005 | 0.000016 | 0.000004 | 0.000037 | 0.000003 | 0.001132 | 0.000016 |

These calculations are all relative to the FCT-3 biotite monitor age at 28.0 Ma, and have not yet been recalculated to the new 28.201 Ma mor

| Intercept<br>Values |         | 36Ar     | 1 $\sigma$ | r2     |               | 37Ar     | 1 $\sigma$ | r2     |             |
|---------------------|---------|----------|------------|--------|---------------|----------|------------|--------|-------------|
| 10C429              | 400 °C  | 0.000439 | 0.000013   | 0.1464 | LIN # 1 3 4 5 | 0.002051 | 0.000007   | 0.9848 | EXP # 7 9   |
| 10C430              | 500 °C  | 0.000448 | 0.000003   | 0.3512 | LIN # 4 6 8 9 | 0.004152 | 0.000016   | 0.9888 | EXP # 1 4   |
| 10C431              | 600 °C  | 0.000412 | 0.000005   | 0.0928 | LIN # 7       | 0.016212 | 0.000064   | 0.9924 | LIN # 1 3 5 |
| 10C433              | 700 °C  | 0.000338 | 0.000004   | 0.1471 | LIN #         | 0.025144 | 0.000112   | 0.9857 | LIN # 1 8   |
| 10C434              | 800 °C  | 0.000374 | 0.000004   | 0.0009 | LIN # 1       | 0.054315 | 0.000115   | 0.9958 | EXP # 1     |
| 10C435              | 900 °C  | 0.000320 | 0.000003   | 0.1211 | LIN #         | 0.039877 | 0.000256   | 0.9712 | EXP #       |
| 10C437              | 975 °C  | 0.000314 | 0.000007   | 0.0471 | LIN # 1 8 9   | 0.024483 | 0.000098   | 0.9854 | LIN # 1 6   |
| 10C438              | 1050 °C | 0.000301 | 0.000003   | 0.3865 | LIN # 1 5     | 0.016945 | 0.000036   | 0.9938 | LIN # 2 6 8 |
| 10C439              | 1125 °C | 0.000312 | 0.000006   | 0.0018 | LIN #         | 0.019444 | 0.000084   | 0.9762 | EXP # 1     |
| 10C440              | 1200 °C | 0.000308 | 0.000004   | 0.2982 | LIN #         | 0.021717 | 0.000039   | 0.9967 | EXP # 1     |
| 10C442              | 1300 °C | 0.000300 | 0.000001   | 0.1663 | LIN # 8       | 0.019957 | 0.000032   | 0.9976 | LIN # 1 2 6 |
| 10C443              | 1400 °C | 0.000309 | 0.000012   | 0.0931 | LIN #         | 0.015250 | 0.000045   | 0.9922 | EXP # 1 5   |

monitor age of Kuiper et al.(2008).

| 38Ar     | 1 $\sigma$ | r2     |               | 39Ar     | 1 $\sigma$ | r2     |             |
|----------|------------|--------|---------------|----------|------------|--------|-------------|
| 0.000099 | 0.000026   | 0.6274 | LIN # 1 2 3   | 0.000582 | 0.000009   | 0.6796 | LIN # 9     |
| 0.000047 | 0.000016   | 0.0922 | LIN #         | 0.000999 | 0.000012   | 0.7668 | LIN # 1 2   |
| 0.000072 | 0.000008   | 0.2424 | LIN # 9       | 0.003755 | 0.000030   | 0.8357 | LIN # 1     |
| 0.000087 | 0.000003   | 0.2908 | LIN #         | 0.006105 | 0.000023   | 0.9759 | EXP # 1     |
| 0.000205 | 0.000004   | 0.5386 | LIN #         | 0.014185 | 0.000019   | 0.9974 | LIN # 1 2   |
| 0.000187 | 0.000005   | 0.3775 | LIN #         | 0.013724 | 0.000027   | 0.9953 | EXP # 1 2   |
| 0.000144 | 0.000014   | 0.2163 | LIN #         | 0.009688 | 0.000015   | 0.9951 | LIN #       |
| 0.000095 | 0.000003   | 0.1186 | LIN # 2 3     | 0.006165 | 0.000019   | 0.9882 | LIN # 3 4 5 |
| 0.000068 | 0.000004   | 0.0520 | LIN #         | 0.003974 | 0.000024   | 0.8261 | LIN #       |
| 0.000066 | 0.000004   | 0.6598 | LIN # 1 4     | 0.002726 | 0.000016   | 0.8394 | LIN #       |
| 0.000040 | 0.000002   | 0.3685 | LIN #         | 0.001786 | 0.000010   | 0.8727 | LIN # 1 4   |
| 0.000039 | 0.000019   | 0.4025 | LIN # 1 3 5 7 | 0.001145 | 0.000018   | 0.0274 | LIN # 2 5 8 |

| 40Ar     | 1σ       | r2     | Sample Parameters | Sample | Material |        |            |
|----------|----------|--------|-------------------|--------|----------|--------|------------|
| 0.054641 | 0.000200 | 0.9552 | EXP # 1           | 10C429 | 400 °C   | CR-358 | groundmass |
| 0.057727 | 0.000177 | 0.9935 | EXP # 1 3 4 5     | 10C430 | 500 °C   | CR-358 | groundmass |
| 0.061834 | 0.000192 | 0.9744 | EXP # 1           | 10C431 | 600 °C   | CR-358 | groundmass |
| 0.052876 | 0.000145 | 0.9746 | EXP # 1           | 10C433 | 700 °C   | CR-358 | groundmass |
| 0.107999 | 0.000629 | 0.9586 | EXP # 1 3         | 10C434 | 800 °C   | CR-358 | groundmass |
| 0.089089 | 0.000218 | 0.9882 | EXP # 1           | 10C435 | 900 °C   | CR-358 | groundmass |
| 0.062365 | 0.000216 | 0.9619 | EXP #             | 10C437 | 975 °C   | CR-358 | groundmass |
| 0.041258 | 0.000059 | 0.9976 | LIN # 2 3 4 5     | 10C438 | 1050 °C  | CR-358 | groundmass |
| 0.029356 | 0.000074 | 0.9412 | PAR #             | 10C439 | 1125 °C  | CR-358 | groundmass |
| 0.022682 | 0.000020 | 0.9867 | EXP # 2 9         | 10C440 | 1200 °C  | CR-358 | groundmass |
| 0.016919 | 0.000038 | 0.4367 | LIN # 1 4         | 10C442 | 1300 °C  | CR-358 | groundmass |
| 0.014275 | 0.000009 | 0.8679 | LIN # 1 3 9       | 10C443 | 1400 °C  | CR-358 | groundmass |

| Location      | Analyst | Temp | Standard<br>(in Ma) | %1 $\sigma$ | J         | %1 $\sigma$ |
|---------------|---------|------|---------------------|-------------|-----------|-------------|
| Steens basalt | jh      | 400  | 28.03               | 0.01        | 0.0016079 | 0.24        |
| Steens basalt | jh      | 500  | 28.03               | 0.01        | 0.0016079 | 0.24        |
| Steens basalt | jh      | 600  | 28.03               | 0.01        | 0.0016079 | 0.24        |
| Steens basalt | jh      | 700  | 28.03               | 0.01        | 0.0016079 | 0.24        |
| Steens basalt | jh      | 800  | 28.03               | 0.01        | 0.0016079 | 0.24        |
| Steens basalt | jh      | 900  | 28.03               | 0.01        | 0.0016079 | 0.24        |
| Steens basalt | jh      | 975  | 28.03               | 0.01        | 0.0016079 | 0.24        |
| Steens basalt | jh      | 1050 | 28.03               | 0.01        | 0.0016079 | 0.24        |
| Steens basalt | jh      | 1125 | 28.03               | 0.01        | 0.0016079 | 0.24        |
| Steens basalt | jh      | 1200 | 28.03               | 0.01        | 0.0016079 | 0.24        |
| Steens basalt | jh      | 1300 | 28.03               | 0.01        | 0.0016079 | 0.24        |
| Steens basalt | jh      | 1400 | 28.03               | 0.01        | 0.0016079 | 0.24        |

| MDF      | %1 $\sigma$ | Volume Ratio | Sensitivity (mol/vol) | Day | Month | Year | Hour | Min | Resist | Irradiation | Project | Standard Name | Irradiation Constants |
|----------|-------------|--------------|-----------------------|-----|-------|------|------|-----|--------|-------------|---------|---------------|-----------------------|
| 1.004933 | 0.06        | 1.0104       | 2.000E-13             | 10  | 03    | 2010 | 10   | 34  | 001    | OSU1D10     | Camp    | FCT-3         | 10C429                |
| 1.004933 | 0.06        | 1.0107       | 2.000E-13             | 10  | 03    | 2010 | 10   | 55  | 001    | OSU1D10     | Camp    | FCT-3         | 10C430                |
| 1.004933 | 0.06        | 1.0103       | 2.000E-13             | 10  | 03    | 2010 | 11   | 18  | 001    | OSU1D10     | Camp    | FCT-3         | 10C431                |
| 1.004933 | 0.06        | 1.0105       | 2.000E-13             | 10  | 03    | 2010 | 12   | 02  | 001    | OSU1D10     | Camp    | FCT-3         | 10C433                |
| 1.004933 | 0.06        | 1.0105       | 2.000E-13             | 10  | 03    | 2010 | 12   | 23  | 001    | OSU1D10     | Camp    | FCT-3         | 10C434                |
| 1.004933 | 0.06        | 1.0106       | 2.000E-13             | 10  | 03    | 2010 | 12   | 45  | 001    | OSU1D10     | Camp    | FCT-3         | 10C435                |
| 1.004933 | 0.06        | 1.0104       | 2.000E-13             | 10  | 03    | 2010 | 13   | 30  | 001    | OSU1D10     | Camp    | FCT-3         | 10C437                |
| 1.004933 | 0.06        | 1.0105       | 2.000E-13             | 10  | 03    | 2010 | 13   | 51  | 001    | OSU1D10     | Camp    | FCT-3         | 10C438                |
| 1.004933 | 0.06        | 1.0108       | 2.000E-13             | 10  | 03    | 2010 | 14   | 13  | 001    | OSU1D10     | Camp    | FCT-3         | 10C439                |
| 1.004933 | 0.06        | 1.0103       | 2.000E-13             | 10  | 03    | 2010 | 14   | 36  | 001    | OSU1D10     | Camp    | FCT-3         | 10C440                |
| 1.004933 | 0.06        | 1.0106       | 2.000E-13             | 10  | 03    | 2010 | 15   | 20  | 001    | OSU1D10     | Camp    | FCT-3         | 10C442                |
| 1.004933 | 0.06        | 1.0103       | 2.000E-13             | 10  | 03    | 2010 | 15   | 42  | 001    | OSU1D10     | Camp    | FCT-3         | 10C443                |



|         | 40/36(a) | %1σ | 40/36(c) | %1σ | 38/36(a) | %1σ | 38/36(c) | %1σ | 39/37(ca) | %1σ | 38/37(ca) | %1σ | 36/37(ca) | %1σ |
|---------|----------|-----|----------|-----|----------|-----|----------|-----|-----------|-----|-----------|-----|-----------|-----|
| 400 °C  | 295.5    | 0   | 0.018    | 35  | 0.1869   | 0   | 1.493    | 3   | 0.000673  | 0   | 0.000139  | 0   | 0.000264  | 0   |
| 500 °C  | 295.5    | 0   | 0.018    | 35  | 0.1869   | 0   | 1.493    | 3   | 0.000673  | 0   | 0.000139  | 0   | 0.000264  | 0   |
| 600 °C  | 295.5    | 0   | 0.018    | 35  | 0.1869   | 0   | 1.493    | 3   | 0.000673  | 0   | 0.000139  | 0   | 0.000264  | 0   |
| 700 °C  | 295.5    | 0   | 0.018    | 35  | 0.1869   | 0   | 1.493    | 3   | 0.000673  | 0   | 0.000139  | 0   | 0.000264  | 0   |
| 800 °C  | 295.5    | 0   | 0.018    | 35  | 0.1869   | 0   | 1.493    | 3   | 0.000673  | 0   | 0.000139  | 0   | 0.000264  | 0   |
| 900 °C  | 295.5    | 0   | 0.018    | 35  | 0.1869   | 0   | 1.493    | 3   | 0.000673  | 0   | 0.000139  | 0   | 0.000264  | 0   |
| 975 °C  | 295.5    | 0   | 0.018    | 35  | 0.1869   | 0   | 1.493    | 3   | 0.000673  | 0   | 0.000139  | 0   | 0.000264  | 0   |
| 1050 °C | 295.5    | 0   | 0.018    | 35  | 0.1869   | 0   | 1.493    | 3   | 0.000673  | 0   | 0.000139  | 0   | 0.000264  | 0   |
| 1125 °C | 295.5    | 0   | 0.018    | 35  | 0.1869   | 0   | 1.493    | 3   | 0.000673  | 0   | 0.000139  | 0   | 0.000264  | 0   |
| 1200 °C | 295.5    | 0   | 0.018    | 35  | 0.1869   | 0   | 1.493    | 3   | 0.000673  | 0   | 0.000139  | 0   | 0.000264  | 0   |
| 1300 °C | 295.5    | 0   | 0.018    | 35  | 0.1869   | 0   | 1.493    | 3   | 0.000673  | 0   | 0.000139  | 0   | 0.000264  | 0   |
| 1400 °C | 295.5    | 0   | 0.018    | 35  | 0.1869   | 0   | 1.493    | 3   | 0.000673  | 0   | 0.000139  | 0   | 0.000264  | 0   |

| 40/39(k) | %1σ | 38/39(k) | %1σ | 36/38(cl) | %1σ | K/Ca | %1σ | K/Cl | %1σ | Ca/Cl | %1σ |
|----------|-----|----------|-----|-----------|-----|------|-----|------|-----|-------|-----|
| 0.00101  | 0   | 0.01138  | 0   | 0         | 0   | 0.43 | 0   | 0    | 0   | 0     | 0   |
| 0.00101  | 0   | 0.01138  | 0   | 0         | 0   | 0.43 | 0   | 0    | 0   | 0     | 0   |
| 0.00101  | 0   | 0.01138  | 0   | 0         | 0   | 0.43 | 0   | 0    | 0   | 0     | 0   |
| 0.00101  | 0   | 0.01138  | 0   | 0         | 0   | 0.43 | 0   | 0    | 0   | 0     | 0   |
| 0.00101  | 0   | 0.01138  | 0   | 0         | 0   | 0.43 | 0   | 0    | 0   | 0     | 0   |
| 0.00101  | 0   | 0.01138  | 0   | 0         | 0   | 0.43 | 0   | 0    | 0   | 0     | 0   |
| 0.00101  | 0   | 0.01138  | 0   | 0         | 0   | 0.43 | 0   | 0    | 0   | 0     | 0   |
| 0.00101  | 0   | 0.01138  | 0   | 0         | 0   | 0.43 | 0   | 0    | 0   | 0     | 0   |
| 0.00101  | 0   | 0.01138  | 0   | 0         | 0   | 0.43 | 0   | 0    | 0   | 0     | 0   |
| 0.00101  | 0   | 0.01138  | 0   | 0         | 0   | 0.43 | 0   | 0    | 0   | 0     | 0   |
| 0.00101  | 0   | 0.01138  | 0   | 0         | 0   | 0.43 | 0   | 0    | 0   | 0     | 0   |
| 0.00101  | 0   | 0.01138  | 0   | 0         | 0   | 0.43 | 0   | 0    | 0   | 0     | 0   |
| 0.00101  | 0   | 0.01138  | 0   | 0         | 0   | 0.43 | 0   | 0    | 0   | 0     | 0   |
| 0.00101  | 0   | 0.01138  | 0   | 0         | 0   | 0.43 | 0   | 0    | 0   | 0     | 0   |
| 0.00101  | 0   | 0.01138  | 0   | 0         | 0   | 0.43 | 0   | 0    | 0   | 0     | 0   |

| Incremental Heating |         |   |
|---------------------|---------|---|
| 10C429              | 400 °C  | ✓ |
| 10C430              | 500 °C  | ✓ |
| 10C431              | 600 °C  | ✓ |
| 10C433              | 700 °C  | ✓ |
| 10C434              | 800 °C  | ✓ |
| 10C435              | 900 °C  | ✓ |
| 10C437              | 975 °C  | ✓ |
| 10C438              | 1050 °C | ✓ |
| 10C439              | 1125 °C | ✓ |
| 10C440              | 1200 °C | ✓ |
| 10C442              | 1300 °C | ✓ |
| 10C443              | 1400 °C | ✓ |

Σ

#### Information on Analysis

CR-358  
groundmass  
Steens basalt  
jh

Project = Camp  
Irradiation = OSU1D10  
J = 0.0016079 ± 0.0000039  
FCT-3 = 28.030 ± 0.003 Ma

| 36Ar(a)  | 37Ar(ca) | 38Ar(cl) | 39Ar(k)  | 40Ar(r)  | Age $\pm 2\sigma$<br>(Ma) | 40Ar(r)<br>(%) | 39Ar(k)<br>(%) | K/Ca $\pm 2\sigma$ | Normal<br>Isochron |         |
|----------|----------|----------|----------|----------|---------------------------|----------------|----------------|--------------------|--------------------|---------|
| 0.000172 | 0.003470 | 0.000048 | 0.000553 | 0.003252 | 16.98 $\pm$ 42.87         | 6.01           | 0.86           | 0.069 $\pm$ 0.003  | 10C429             | 400 °C  |
| 0.000179 | 0.007022 | 0.000000 | 0.000973 | 0.004303 | 12.78 $\pm$ 11.42         | 7.52           | 1.51           | 0.060 $\pm$ 0.002  | 10C430             | 500 °C  |
| 0.000139 | 0.027459 | 0.000000 | 0.003732 | 0.020338 | 15.74 $\pm$ 3.40          | 33.14          | 5.78           | 0.058 $\pm$ 0.001  | 10C431             | 600 °C  |
| 0.000061 | 0.042616 | 0.000000 | 0.006086 | 0.034150 | 16.20 $\pm$ 1.91          | 65.29          | 9.43           | 0.061 $\pm$ 0.001  | 10C433             | 700 °C  |
| 0.000083 | 0.092119 | 0.000008 | 0.014179 | 0.083353 | 16.97 $\pm$ 0.90          | 77.18          | 21.97          | 0.066 $\pm$ 0.001  | 10C434             | 800 °C  |
| 0.000036 | 0.067632 | 0.000007 | 0.013733 | 0.078178 | 16.44 $\pm$ 0.82          | 87.94          | 21.27          | 0.087 $\pm$ 0.002  | 10C435             | 900 °C  |
| 0.000036 | 0.041480 | 0.000013 | 0.009686 | 0.051268 | 15.29 $\pm$ 1.57          | 82.87          | 15.01          | 0.100 $\pm$ 0.001  | 10C437             | 975 °C  |
| 0.000025 | 0.028670 | 0.000007 | 0.006151 | 0.033162 | 15.57 $\pm$ 1.78          | 81.79          | 9.53           | 0.092 $\pm$ 0.001  | 10C438             | 1050 °C |
| 0.000034 | 0.032913 | 0.000001 | 0.003944 | 0.018568 | 13.61 $\pm$ 3.70          | 65.08          | 6.11           | 0.052 $\pm$ 0.001  | 10C439             | 1125 °C |
| 0.000028 | 0.036743 | 0.000012 | 0.002682 | 0.013526 | 14.57 $\pm$ 4.42          | 62.11          | 4.16           | 0.031 $\pm$ 0.001  | 10C440             | 1200 °C |
| 0.000018 | 0.033723 | 0.000000 | 0.001734 | 0.010770 | 17.93 $\pm$ 5.71          | 67.44          | 2.69           | 0.022 $\pm$ 0.000  | 10C442             | 1300 °C |
| 0.000029 | 0.025741 | 0.000002 | 0.001097 | 0.004779 | 12.60 $\pm$ 19.90         | 35.96          | 1.70           | 0.018 $\pm$ 0.001  | 10C443             | 1400 °C |
| 0.000840 | 0.439588 | 0.000099 | 0.064550 | 0.355647 |                           |                |                |                    |                    |         |

| Results          | 40(r)/39(k) $\pm 2\sigma$          | Age $\pm 2\sigma$<br>(Ma)                                                                   | MSWD                   | 39Ar(k)<br>(%,n)                                           | K/Ca $\pm 2\sigma$ | Results    |
|------------------|------------------------------------|---------------------------------------------------------------------------------------------|------------------------|------------------------------------------------------------|--------------------|------------|
| Weighted Plateau | 5.6488 $\pm$ 0.1747<br>$\pm$ 3.09% | 16.31 $\pm$ 0.51<br>$\pm$ 3.12%<br>External Error $\pm$ 0.57<br>Analytical Error $\pm$ 0.50 | 0.76<br>2.20<br>1.0000 | 100.00<br>12<br>Statistical T Ratio<br>Error Magnification | 0.039 $\pm$ 0.014  | Isochron   |
| Total Fusion Age | 5.5096 $\pm$ 0.2720<br>$\pm$ 4.94% | 15.91 $\pm$ 0.79<br>$\pm$ 4.94%<br>External Error $\pm$ 0.83<br>Analytical Error $\pm$ 0.78 |                        | 12                                                         | 0.063 $\pm$ 0.000  | Statistics |

| 39(k)/36(a) ± 2σ |               | 40(a+r)/36(a) ± 2σ | r.i.   | Inverse Isochron |         | 39(k)/40(a+r) ± 2σ |                     |
|------------------|---------------|--------------------|--------|------------------|---------|--------------------|---------------------|
| ✓                | 3.2 ± 0.5     | 314.4 ± 51.0       | 0.9752 | 10C429           | 400 °C  | ✓                  | 0.010217 ± 0.000375 |
| ✓                | 5.4 ± 0.4     | 319.5 ± 23.3       | 0.9408 | 10C430           | 500 °C  | ✓                  | 0.017002 ± 0.000443 |
| ✓                | 26.9 ± 2.9    | 442.0 ± 47.3       | 0.9867 | 10C431           | 600 °C  | ✓                  | 0.060821 ± 0.001069 |
| ✓                | 99.1 ± 22.0   | 851.6 ± 189.2      | 0.9991 | 10C433           | 700 °C  | ✓                  | 0.116370 ± 0.001107 |
| ✓                | 170.1 ± 29.3  | 1295.5 ± 223.8     | 0.9975 | 10C434           | 800 °C  | ✓                  | 0.131306 ± 0.001596 |
| ✓                | 379.2 ± 137.7 | 2454.0 ± 891.1     | 0.9998 | 10C435           | 900 °C  | ✓                  | 0.154511 ± 0.000998 |
| ✓                | 270.3 ± 134.3 | 1726.0 ± 858.0     | 0.9999 | 10C437           | 975 °C  | ✓                  | 0.156586 ± 0.001228 |
| ✓                | 246.4 ± 127.1 | 1623.7 ± 837.6     | 0.9999 | 10C438           | 1050 °C | ✓                  | 0.151730 ± 0.001092 |
| ✓                | 117.0 ± 59.4  | 846.5 ± 429.7      | 0.9996 | 10C439           | 1125 °C | ✓                  | 0.138262 ± 0.001891 |
| ✓                | 96.1 ± 47.9   | 780.1 ± 389.1      | 0.9997 | 10C440           | 1200 °C | ✓                  | 0.123188 ± 0.001553 |
| ✓                | 98.6 ± 65.3   | 907.8 ± 601.2      | 0.9998 | 10C442           | 1300 °C | ✓                  | 0.108579 ± 0.001487 |
| ✓                | 38.1 ± 33.9   | 461.5 ± 410.8      | 0.9993 | 10C443           | 1400 °C | ✓                  | 0.082535 ± 0.002836 |

| 40(a)/36(a) ± 2σ              |  | 40(r)/39(k) ± 2σ           |  | Age ± 2σ<br>(Ma)                                 |  | MSWD            | Results    |  | 40(a)/36(a) ± 2σ              |  |
|-------------------------------|--|----------------------------|--|--------------------------------------------------|--|-----------------|------------|--|-------------------------------|--|
|                               |  |                            |  |                                                  |  |                 |            |  |                               |  |
| 292.8232 ± 17.7333<br>± 6.06% |  | 5.5217 ± 0.2210<br>± 4.00% |  | 15.95 ± 0.64<br>± 4.01%                          |  | 1.08            | Isochron   |  | 291.8453 ± 17.0999<br>± 5.86% |  |
|                               |  |                            |  | External Error ± 0.69<br>Analytical Error ± 0.64 |  |                 |            |  |                               |  |
| Statistical F Ratio           |  | 1.83                       |  | Convergence                                      |  | 0.0000000545    | Statistics |  | Statistical F Ratio           |  |
| Error Magnification           |  | 1.0378                     |  | Number of Iterations                             |  | 270             |            |  | Error Magnification           |  |
| n                             |  | 12                         |  | Calculated Line                                  |  | Weighted York-2 |            |  | n                             |  |

| $36(a)/40(a+r) \pm 2\sigma$ | r.i.   | Degassing<br>Patterns | 36Ar(a)  | 36Ar(c)  | 36Ar(ca) | 36Ar(cl) |
|-----------------------------|--------|-----------------------|----------|----------|----------|----------|
| 0.003181 $\pm$ 0.000516     | 0.0094 | 10C429 400 °C ✓       | 0.000172 | 0.000000 | 0.000001 | 0.000000 |
| 0.003130 $\pm$ 0.000228     | 0.0209 | 10C430 500 °C ✓       | 0.000179 | 0.000000 | 0.000002 | 0.000000 |
| 0.002262 $\pm$ 0.000242     | 0.0216 | 10C431 600 °C ✓       | 0.000139 | 0.000000 | 0.000007 | 0.000000 |
| 0.001174 $\pm$ 0.000261     | 0.0152 | 10C433 700 °C ✓       | 0.000061 | 0.000000 | 0.000011 | 0.000000 |
| 0.000772 $\pm$ 0.000133     | 0.0662 | 10C434 800 °C ✓       | 0.000083 | 0.000000 | 0.000024 | 0.000000 |
| 0.000407 $\pm$ 0.000148     | 0.0106 | 10C435 900 °C ✓       | 0.000036 | 0.000000 | 0.000018 | 0.000000 |
| 0.000579 $\pm$ 0.000288     | 0.0129 | 10C437 975 °C ✓       | 0.000036 | 0.000000 | 0.000011 | 0.000000 |
| 0.000616 $\pm$ 0.000318     | 0.0026 | 10C438 1050 °C ✓      | 0.000025 | 0.000000 | 0.000008 | 0.000000 |
| 0.001181 $\pm$ 0.000600     | 0.0043 | 10C439 1125 °C ✓      | 0.000034 | 0.000000 | 0.000009 | 0.000000 |
| 0.001282 $\pm$ 0.000639     | 0.0012 | 10C440 1200 °C ✓      | 0.000028 | 0.000000 | 0.000010 | 0.000000 |
| 0.001102 $\pm$ 0.000729     | 0.0033 | 10C442 1300 °C ✓      | 0.000018 | 0.000000 | 0.000009 | 0.000000 |
| 0.002167 $\pm$ 0.001929     | 0.0003 | 10C443 1400 °C ✓      | 0.000029 | 0.000000 | 0.000007 | 0.000000 |
|                             |        | $\Sigma$              | 0.000840 | 0.000000 | 0.000116 | 0.000000 |
|                             |        | $\Sigma$              | 0.000956 |          |          |          |

| $40(r)/39(k) \pm 2\sigma$                                | Age $\pm 2\sigma$<br>(Ma)       | MSWD |
|----------------------------------------------------------|---------------------------------|------|
| 5.6706 $\pm$ 0.1983<br>$\pm$ 3.50%                       | 16.37 $\pm$ 0.58<br>$\pm$ 3.51% | 0.82 |
| External Error $\pm$ 0.63<br>Analytical Error $\pm$ 0.57 |                                 |      |
| Convergence                                              | 0.0000000129                    |      |
| Number of Iterations                                     | 4                               |      |
| Calculated Line                                          | Weighted York-2                 |      |

| 37Ar(ca) | 38Ar(a)  | 38Ar(c)  | 38Ar(k)  | 38Ar(ca) | 38Ar(cl) | 39Ar(k)  | 39Ar(ca) | 40Ar(r)  | 40Ar(a)  | 40Ar(c)  |
|----------|----------|----------|----------|----------|----------|----------|----------|----------|----------|----------|
| 0.003470 | 0.000032 | 0.000000 | 0.000006 | 0.000000 | 0.000048 | 0.000553 | 0.000002 | 0.003252 | 0.050885 | 0.000000 |
| 0.007022 | 0.000033 | 0.000000 | 0.000011 | 0.000001 | 0.000000 | 0.000973 | 0.000005 | 0.004303 | 0.052945 | 0.000000 |
| 0.027459 | 0.000026 | 0.000000 | 0.000042 | 0.000004 | 0.000000 | 0.003732 | 0.000018 | 0.020338 | 0.041021 | 0.000000 |
| 0.042616 | 0.000011 | 0.000000 | 0.000069 | 0.000006 | 0.000000 | 0.006086 | 0.000029 | 0.034150 | 0.018148 | 0.000000 |
| 0.092119 | 0.000016 | 0.000000 | 0.000161 | 0.000013 | 0.000008 | 0.014179 | 0.000062 | 0.083353 | 0.024632 | 0.000000 |
| 0.067632 | 0.000007 | 0.000000 | 0.000156 | 0.000009 | 0.000007 | 0.013733 | 0.000046 | 0.078178 | 0.010702 | 0.000000 |
| 0.041480 | 0.000007 | 0.000000 | 0.000110 | 0.000006 | 0.000013 | 0.009686 | 0.000028 | 0.051268 | 0.010590 | 0.000000 |
| 0.028670 | 0.000005 | 0.000000 | 0.000070 | 0.000004 | 0.000007 | 0.006151 | 0.000019 | 0.033162 | 0.007378 | 0.000000 |
| 0.032913 | 0.000006 | 0.000000 | 0.000045 | 0.000005 | 0.000001 | 0.003944 | 0.000022 | 0.018568 | 0.009958 | 0.000000 |
| 0.036743 | 0.000005 | 0.000000 | 0.000031 | 0.000005 | 0.000012 | 0.002682 | 0.000025 | 0.013526 | 0.008247 | 0.000000 |
| 0.033723 | 0.000003 | 0.000000 | 0.000020 | 0.000005 | 0.000000 | 0.001734 | 0.000023 | 0.010770 | 0.005198 | 0.000000 |
| 0.025741 | 0.000005 | 0.000000 | 0.000012 | 0.000004 | 0.000002 | 0.001097 | 0.000017 | 0.004779 | 0.008510 | 0.000000 |
| 0.439588 | 0.000157 | 0.000000 | 0.000735 | 0.000061 | 0.000099 | 0.064550 | 0.000296 | 0.355647 | 0.248214 | 0.000000 |
| 0.439588 |          |          |          |          | 0.001051 |          | 0.064846 |          |          |          |



| 40Ar(k)  | Additional Parameters |         |   | 40(r)/39(k) | 1σ      | 40(r+a) | 1σ      | 40Ar/39Ar | 1σ      | 37Ar/39Ar | 1σ      |
|----------|-----------------------|---------|---|-------------|---------|---------|---------|-----------|---------|-----------|---------|
| 0.000001 | 10C429                | 400 °C  | ✓ | 5.880022    | 7.45969 | 0.05414 | 0.00020 | 97.46504  | 1.78324 | 6.24638   | 0.11942 |
| 0.000001 | 10C430                | 500 °C  | ✓ | 4.420940    | 1.98294 | 0.05725 | 0.00018 | 58.53221  | 0.75884 | 7.17910   | 0.10830 |
| 0.000004 | 10C431                | 600 °C  | ✓ | 5.449722    | 0.59057 | 0.06136 | 0.00020 | 16.36181  | 0.14316 | 7.32177   | 0.07846 |
| 0.000006 | 10C433                | 700 °C  | ✓ | 5.611327    | 0.33268 | 0.05230 | 0.00015 | 8.55395   | 0.04056 | 6.96965   | 0.05677 |
| 0.000014 | 10C434                | 800 °C  | ✓ | 5.878599    | 0.15652 | 0.10798 | 0.00064 | 7.58363   | 0.04608 | 6.46855   | 0.04007 |
| 0.000014 | 10C435                | 900 °C  | ✓ | 5.692711    | 0.14288 | 0.08888 | 0.00022 | 6.45167   | 0.02081 | 4.90850   | 0.04313 |
| 0.000010 | 10C437                | 975 °C  | ✓ | 5.292915    | 0.27280 | 0.06186 | 0.00022 | 6.36891   | 0.02495 | 4.27009   | 0.03054 |
| 0.000006 | 10C438                | 1050 °C | ✓ | 5.391174    | 0.31005 | 0.04054 | 0.00006 | 6.57103   | 0.02358 | 4.64628   | 0.03216 |
| 0.000004 | 10C439                | 1125 °C | ✓ | 4.707912    | 0.64174 | 0.02853 | 0.00008 | 7.19327   | 0.04895 | 8.29851   | 0.07882 |
| 0.000003 | 10C440                | 1200 °C | ✓ | 5.042764    | 0.76748 | 0.02177 | 0.00003 | 8.04449   | 0.05027 | 13.57393  | 0.11601 |
| 0.000002 | 10C442                | 1300 °C | ✓ | 6.212014    | 0.99371 | 0.01597 | 0.00004 | 9.09186   | 0.06158 | 19.19978  | 0.16495 |
| 0.000001 | 10C443                | 1400 °C | ✓ | 4.357399    | 3.45459 | 0.01329 | 0.00002 | 11.92867  | 0.20180 | 23.10365  | 0.41662 |
| 0.000065 |                       |         |   |             |         |         |         |           |         |           |         |
| 0.603926 |                       |         |   |             |         |         |         |           |         |           |         |

| 36Ar/39Ar | 1 $\sigma$ | 37Ar<br>(decay) | 39Ar<br>(decay) | 40Ar<br>(moles) |
|-----------|------------|-----------------|-----------------|-----------------|
| 0.31166   | 0.02572    | 1.70158636      | 1.00018991      | 1.083E-14       |
| 0.18508   | 0.00704    | 1.70207657      | 1.00019001      | 1.145E-14       |
| 0.03895   | 0.00200    | 1.70261363      | 1.00019012      | 1.227E-14       |
| 0.01188   | 0.00112    | 1.70364153      | 1.00019034      | 1.046E-14       |
| 0.00756   | 0.00050    | 1.70413233      | 1.00019044      | 2.160E-14       |
| 0.00392   | 0.00048    | 1.70464666      | 1.00019055      | 1.778E-14       |
| 0.00482   | 0.00092    | 1.70569918      | 1.00019077      | 1.237E-14       |
| 0.00527   | 0.00104    | 1.70619057      | 1.00019087      | 8.109E-15       |
| 0.01069   | 0.00216    | 1.70670552      | 1.00019098      | 5.706E-15       |
| 0.01389   | 0.00257    | 1.70724404      | 1.00019109      | 4.355E-15       |
| 0.01508   | 0.00332    | 1.70827473      | 1.00019131      | 3.194E-15       |
| 0.03195   | 0.01152    | 1.70879031      | 1.00019142      | 2.658E-15       |

10C429.AGE >>> CR-358 >>> CAMP PROJECT

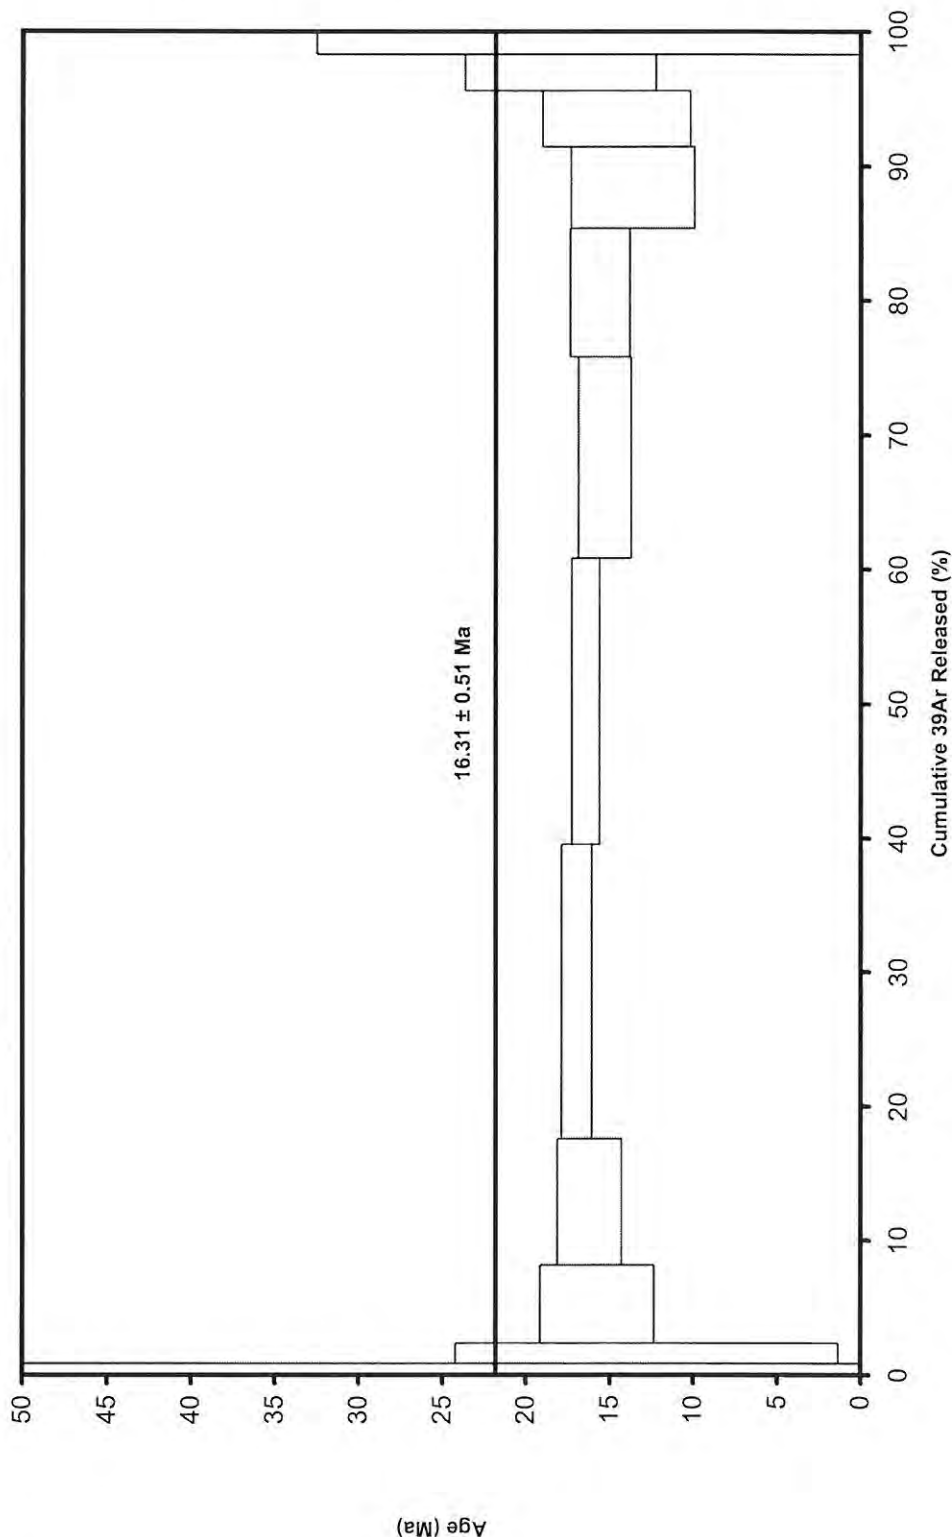

**Ar-Ages in Ma**

WEIGHTED PLATEAU  
 $16.31 \pm 0.51$

TOTAL FUSION  
 $15.91 \pm 0.79$

NORMAL ISOCHRON  
 $15.95 \pm 0.64$

INVERSE ISOCHRON  
 $16.37 \pm 0.58$

MSWD  
0.76

**Sample Info**

groundmass  
Steens basalt  
jh

IRR = OSU1D10  
J =  $0.0016079 \pm$

DR2013250 Camp

10C429.AGE >>> CR-358 >>> CAMP PROJECT

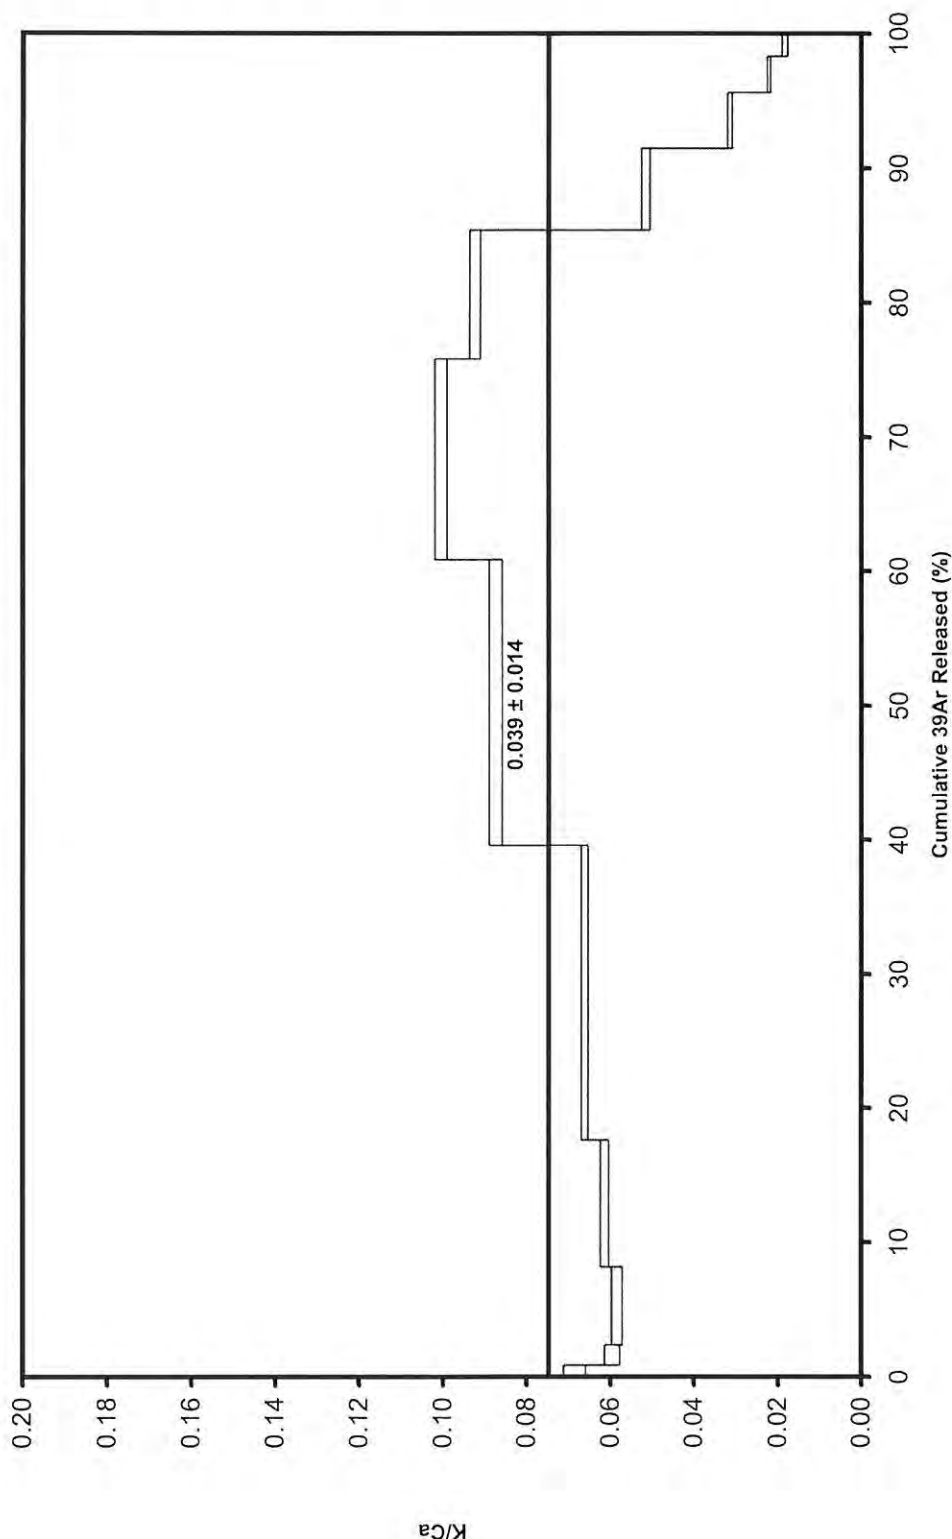

**Ar-Ages in Ma**

WEIGHTED PLATEAU  
16.31  $\pm$  0.51

TOTAL FUSION  
15.91  $\pm$  0.79

NORMAL ISOCHRON  
15.95  $\pm$  0.64

INVERSE ISOCHRON  
16.37  $\pm$  0.58

**Sample Info**

groundmass  
Steens basalt  
jh

IRR = OSU1D10  
J = 0.0016079  $\pm$

DR2013250 Camp

10C429.AGE >>> CR-358 >>> CAMP PROJECT

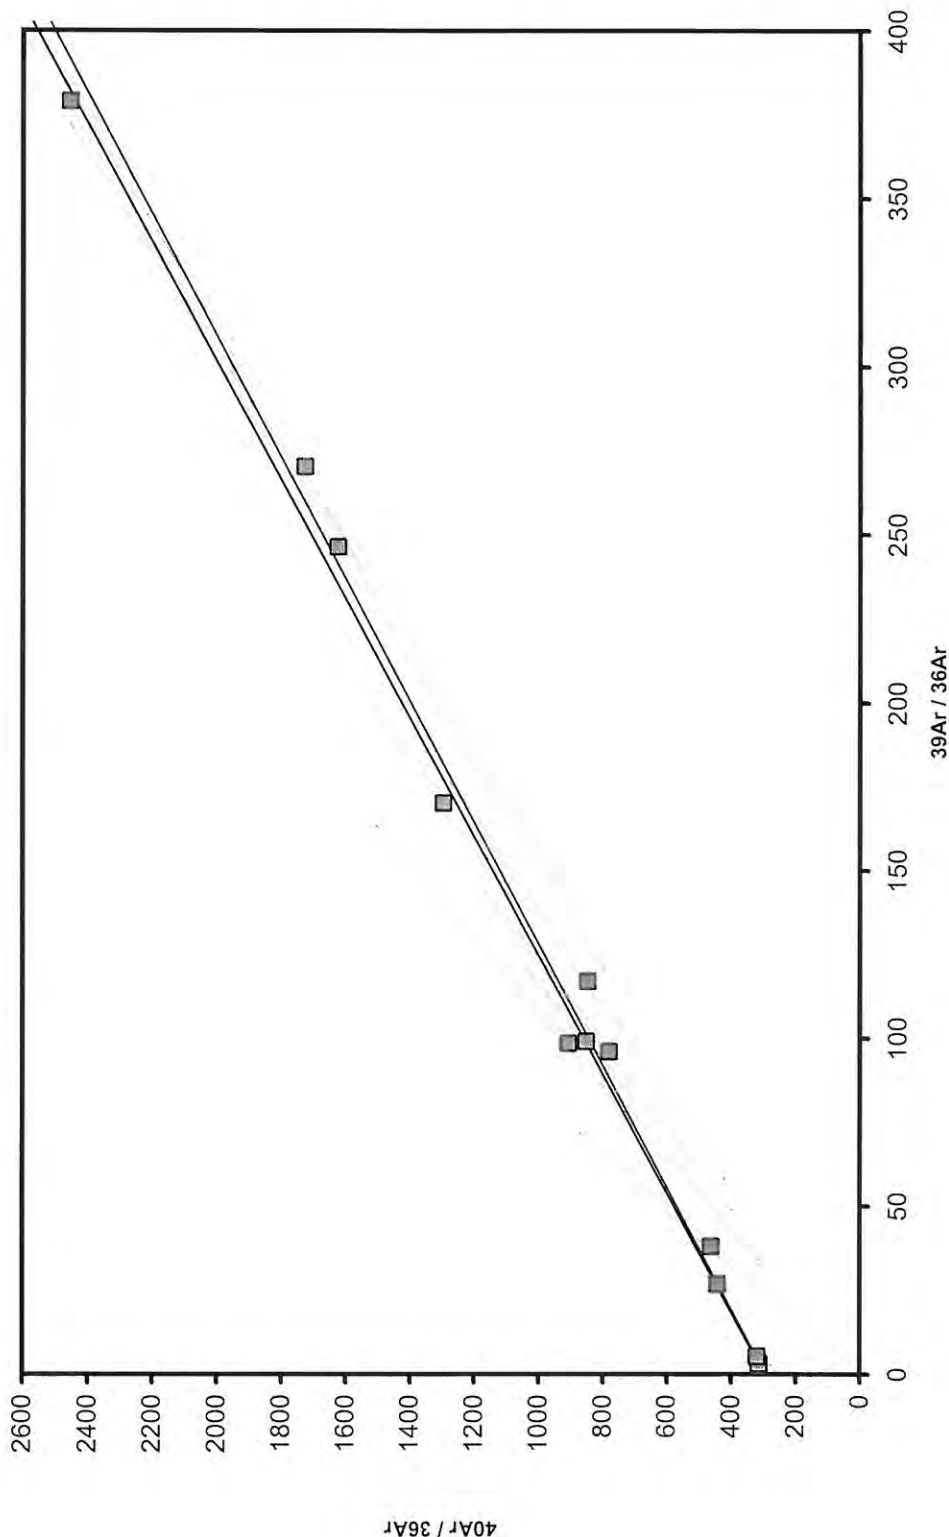

**Ar-Ages in Ma**

WEIGHTED PLATEAU  
16.31 ± 0.51

TOTAL FUSION  
15.91 ± 0.79

NORMAL ISOCHRON  
15.95 ± 0.64

INVERSE ISOCHRON  
16.37 ± 0.58

MSWD  
1.08

**Sample Info**

groundmass  
Steens basalt  
jh

IRR = OSU1D10  
J = 0.0016079 ±

DR2013250 Camp

10C429.AGE >>> CR-358 >>> CAMP PROJECT

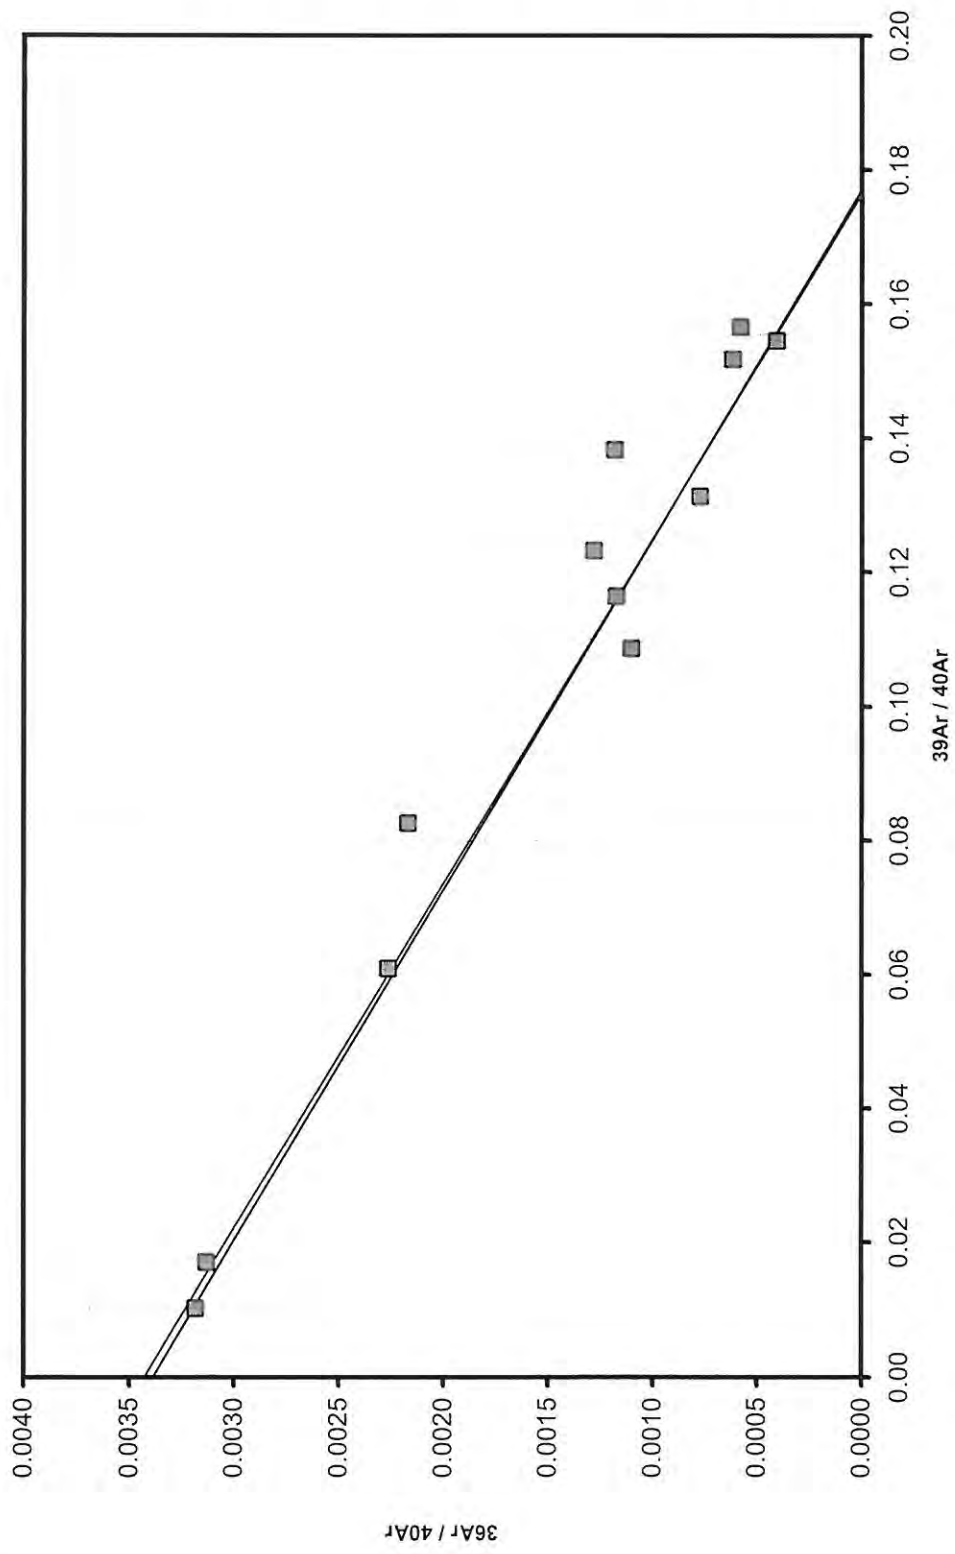

| Ar-Ages in Ma    |              |
|------------------|--------------|
| WEIGHTED PLATEAU | 16.31 ± 0.51 |
| TOTAL FUSION     | 15.91 ± 0.79 |
| NORMAL ISOCHRON  | 15.95 ± 0.64 |
| INVERSE ISOCHRON | 16.37 ± 0.58 |
| MSWD             | 0.82         |

| Sample Info   |  |
|---------------|--|
| groundmass    |  |
| Steens basalt |  |
| jh            |  |

IRR = OSU1D10  
J = 0.0016079 ±

DR2013250 Camp



Age Data - Sample CR-462

| Procedure |         | 36Ar     | 1σ       | 37Ar     | 1σ       | 38Ar     | 1σ       | 39Ar     | 1σ       | 40Ar     | 1σ       |
|-----------|---------|----------|----------|----------|----------|----------|----------|----------|----------|----------|----------|
| Blanks    |         |          |          |          |          |          |          |          |          |          |          |
| 10C445    | 400 °C  | 0.000264 | 0.000002 | 0.000011 | 0.000002 | 0.000003 | 0.000003 | 0.000005 | 0.000002 | 0.000644 | 0.000006 |
| 10C446    | 500 °C  | 0.000269 | 0.000003 | 0.000022 | 0.000005 | 0.000024 | 0.000005 | 0.000033 | 0.000004 | 0.001051 | 0.000015 |
| 10C447    | 600 °C  | 0.000272 | 0.000003 | 0.000031 | 0.000005 | 0.000027 | 0.000005 | 0.000040 | 0.000004 | 0.001157 | 0.000015 |
| 10C449    | 700 °C  | 0.000277 | 0.000003 | 0.000052 | 0.000005 | 0.000025 | 0.000005 | 0.000044 | 0.000004 | 0.001220 | 0.000015 |
| 10C450    | 800 °C  | 0.000279 | 0.000003 | 0.000065 | 0.000005 | 0.000020 | 0.000005 | 0.000041 | 0.000004 | 0.001194 | 0.000015 |
| 10C451    | 900 °C  | 0.000281 | 0.000003 | 0.000077 | 0.000005 | 0.000015 | 0.000005 | 0.000037 | 0.000004 | 0.001148 | 0.000015 |
| 10C453    | 1000 °C | 0.000283 | 0.000003 | 0.000099 | 0.000005 | 0.000015 | 0.000005 | 0.000026 | 0.000004 | 0.001028 | 0.000015 |
| 10C454    | 1100 °C | 0.000282 | 0.000003 | 0.000115 | 0.000005 | 0.000015 | 0.000005 | 0.000017 | 0.000004 | 0.000947 | 0.000015 |
| 10C455    | 1200 °C | 0.000280 | 0.000003 | 0.000121 | 0.000005 | 0.000015 | 0.000005 | 0.000014 | 0.000004 | 0.000932 | 0.000015 |
| 10C456    | 1300 °C | 0.000278 | 0.000003 | 0.000125 | 0.000005 | 0.000015 | 0.000005 | 0.000013 | 0.000004 | 0.000955 | 0.000015 |
| 10C458    | 1400 °C | 0.000270 | 0.000003 | 0.000124 | 0.000005 | 0.000016 | 0.000005 | 0.000021 | 0.000004 | 0.001134 | 0.000015 |

These calculations are all relative to the FCT-3 biotite monitor age at 28.0 Ma, and have not yet been recalculated to the new 28.201 Ma mor

| Intercept<br>Values |         | 36Ar     | 1 $\sigma$ | r2     |             | 37Ar     | 1 $\sigma$ | r2     |               |
|---------------------|---------|----------|------------|--------|-------------|----------|------------|--------|---------------|
| 10C445              | 400 °C  | 0.003747 | 0.000022   | 0.9385 | LIN # 3     | 0.004604 | 0.000030   | 0.9545 | LIN # 1 3     |
| 10C446              | 500 °C  | 0.003452 | 0.000013   | 0.9779 | LIN # 4 5 6 | 0.007971 | 0.000021   | 0.9847 | LIN #         |
| 10C447              | 600 °C  | 0.002938 | 0.000019   | 0.9794 | LIN # 1 2 3 | 0.039410 | 0.000136   | 0.9910 | LIN # 1 3     |
| 10C449              | 700 °C  | 0.001538 | 0.000013   | 0.9039 | LIN # 1 3   | 0.067432 | 0.000191   | 0.9934 | LIN # 1 5 7 8 |
| 10C450              | 800 °C  | 0.000797 | 0.000015   | 0.6510 | LIN #       | 0.054248 | 0.000177   | 0.9934 | LIN # 2 4     |
| 10C451              | 900 °C  | 0.000533 | 0.000009   | 0.7035 | LIN # 2 4   | 0.030193 | 0.000056   | 0.9972 | EXP # 1 4 5   |
| 10C453              | 1000 °C | 0.000460 | 0.000001   | 0.9879 | LIN # 2 8 9 | 0.025182 | 0.000126   | 0.9700 | LIN #         |
| 10C454              | 1100 °C | 0.000370 | 0.000006   | 0.0013 | LIN # 1 5 8 | 0.013937 | 0.000101   | 0.9607 | LIN # 1 3     |
| 10C455              | 1200 °C | 0.000373 | 0.000005   | 0.1426 | LIN # 5     | 0.022562 | 0.000043   | 0.9978 | LIN # 3 5 6 7 |
| 10C456              | 1300 °C | 0.000330 | 0.000013   | 0.1756 | LIN #       | 0.024093 | 0.000090   | 0.9815 | EXP # 1       |
| 10C458              | 1400 °C | 0.000326 | 0.000008   | 0.0136 | LIN #       | 0.015929 | 0.000041   | 0.9959 | LIN # 1 3 5   |

nitor age of Kuiper et al.(2008).

| 38Ar     | 1 $\sigma$ | r2     |             | 39Ar     | 1 $\sigma$ | r2     |             |
|----------|------------|--------|-------------|----------|------------|--------|-------------|
| 0.000709 | 0.000005   | 0.4975 | LIN #       | 0.002322 | 0.000016   | 0.9975 | EXP #       |
| 0.000717 | 0.000007   | 0.6191 | LIN #       | 0.005642 | 0.000017   | 0.9957 | LIN #       |
| 0.000724 | 0.000006   | 0.3216 | LIN #       | 0.014753 | 0.000019   | 0.6854 | LIN # 2     |
| 0.000487 | 0.000005   | 0.5579 | LIN # 3     | 0.017620 | 0.000026   | 0.9883 | LIN # 1 8   |
| 0.000284 | 0.000011   | 0.2289 | LIN # 3 4 6 | 0.012520 | 0.000027   | 0.9894 | EXP # 1     |
| 0.000128 | 0.000014   | 0.0044 | LIN #       | 0.005558 | 0.000029   | 0.7832 | EXP # 1     |
| 0.000089 | 0.000002   | 0.5100 | LIN #       | 0.003278 | 0.000017   | 0.8128 | LIN # 4     |
| 0.000062 | 0.000005   | 0.8810 | LIN # 1 3 4 | 0.001195 | 0.000018   | 0.0585 | LIN #       |
| 0.000033 | 0.000010   | 0.3378 | LIN # 2 8 9 | 0.001318 | 0.000009   | 0.4214 | LIN # 2 3   |
| 0.000059 | 0.000008   | 0.1984 | LIN # 3 9   | 0.001026 | 0.000011   | 0.6491 | LIN # 4 5   |
| 0.000025 | 0.000003   | 0.0003 | LIN # 2 5   | 0.000629 | 0.000003   | 0.9789 | LIN # 5 8 9 |

| 40Ar     | 1σ       | r2     |               | Sample<br>Parameters | Sample  | Material |            |
|----------|----------|--------|---------------|----------------------|---------|----------|------------|
| 1.020259 | 0.001515 | 0.9952 | LIN # 1 3     | 10C445               | 400 °C  | CR-462   | groundmass |
| 0.952261 | 0.001134 | 0.9972 | LIN # 1 2 3   | 10C446               | 500 °C  | CR-462   | groundmass |
| 0.850699 | 0.000451 | 0.9992 | EXP #         | 10C447               | 600 °C  | CR-462   | groundmass |
| 0.461468 | 0.000370 | 0.9992 | LIN # 1 2 6   | 10C449               | 700 °C  | CR-462   | groundmass |
| 0.215792 | 0.000356 | 0.9957 | EXP # 1       | 10C450               | 800 °C  | CR-462   | groundmass |
| 0.100026 | 0.000228 | 0.9915 | EXP # 1 3 4   | 10C451               | 900 °C  | CR-462   | groundmass |
| 0.068696 | 0.000059 | 0.9965 | EXP # 1 2     | 10C453               | 1000 °C | CR-462   | groundmass |
| 0.032050 | 0.000035 | 0.9707 | LIN # 1       | 10C454               | 1100 °C | CR-462   | groundmass |
| 0.032830 | 0.000082 | 0.8640 | LIN # 1 3     | 10C455               | 1200 °C | CR-462   | groundmass |
| 0.024640 | 0.000020 | 0.2066 | LIN # 1 2 4 5 | 10C456               | 1300 °C | CR-462   | groundmass |
| 0.016206 | 0.000084 | 0.2195 | LIN #         | 10C458               | 1400 °C | CR-462   | groundmass |

| Location      | Analyst | Temp | Standard<br>(in Ma) | %1 $\sigma$ | J       | %1 $\sigma$ |
|---------------|---------|------|---------------------|-------------|---------|-------------|
| Steens basalt | jh      | 400  | 28.03               | 0.01        | 0.00159 | 0.25        |
| Steens basalt | jh      | 500  | 28.03               | 0.01        | 0.00159 | 0.25        |
| Steens basalt | jh      | 600  | 28.03               | 0.01        | 0.00159 | 0.25        |
| Steens basalt | jh      | 700  | 28.03               | 0.01        | 0.00159 | 0.25        |
| Steens basalt | jh      | 800  | 28.03               | 0.01        | 0.00159 | 0.25        |
| Steens basalt | jh      | 900  | 28.03               | 0.01        | 0.00159 | 0.25        |
| Steens basalt | jh      | 1000 | 28.03               | 0.01        | 0.00159 | 0.25        |
| Steens basalt | jh      | 1100 | 28.03               | 0.01        | 0.00159 | 0.25        |
| Steens basalt | jh      | 1200 | 28.03               | 0.01        | 0.00159 | 0.25        |
| Steens basalt | jh      | 1300 | 28.03               | 0.01        | 0.00159 | 0.25        |
| Steens basalt | jh      | 1400 | 28.03               | 0.01        | 0.00159 | 0.25        |

| MDF      | %1 $\sigma$ | Volume Ratio | Sensitivity (mol/vol) | Day | Month | Year | Hour | Min | Resist | Irradiation | Project | Standard Name | Irradiation Constants |
|----------|-------------|--------------|-----------------------|-----|-------|------|------|-----|--------|-------------|---------|---------------|-----------------------|
| 1.004933 | 0.06        | 1.0106       | 2.000E-13             | 11  | 03    | 2010 | 10   | 17  | 001    | OSU1D10     | Camp    | FCT-3         | 10C445                |
| 1.004933 | 0.06        | 1.011        | 2.000E-13             | 11  | 03    | 2010 | 10   | 39  | 001    | OSU1D10     | Camp    | FCT-3         | 10C446                |
| 1.004933 | 0.06        | 1.011        | 2.000E-13             | 11  | 03    | 2010 | 11   | 01  | 001    | OSU1D10     | Camp    | FCT-3         | 10C447                |
| 1.004933 | 0.06        | 1.0111       | 2.000E-13             | 11  | 03    | 2010 | 11   | 45  | 001    | OSU1D10     | Camp    | FCT-3         | 10C449                |
| 1.004933 | 0.06        | 1.0108       | 2.000E-13             | 11  | 03    | 2010 | 12   | 09  | 001    | OSU1D10     | Camp    | FCT-3         | 10C450                |
| 1.004933 | 0.06        | 1.0109       | 2.000E-13             | 11  | 03    | 2010 | 12   | 31  | 001    | OSU1D10     | Camp    | FCT-3         | 10C451                |
| 1.004933 | 0.06        | 1.0107       | 2.000E-13             | 11  | 03    | 2010 | 13   | 15  | 001    | OSU1D10     | Camp    | FCT-3         | 10C453                |
| 1.004933 | 0.06        | 1.0109       | 2.000E-13             | 11  | 03    | 2010 | 13   | 54  | 001    | OSU1D10     | Camp    | FCT-3         | 10C454                |
| 1.004933 | 0.06        | 1.0112       | 2.000E-13             | 11  | 03    | 2010 | 14   | 17  | 001    | OSU1D10     | Camp    | FCT-3         | 10C455                |
| 1.004933 | 0.06        | 1.0109       | 2.000E-13             | 11  | 03    | 2010 | 14   | 39  | 001    | OSU1D10     | Camp    | FCT-3         | 10C456                |
| 1.004933 | 0.06        | 1.0109       | 2.000E-13             | 11  | 03    | 2010 | 15   | 21  | 001    | OSU1D10     | Camp    | FCT-3         | 10C458                |

|         | 40/36(a) | %1σ | 40/36(c) | %1σ | 38/36(a) | %1σ | 38/36(c) | %1σ | 39/37(ca) | %1σ | 38/37(ca) | %1σ | 36/37(ca) | %1σ |
|---------|----------|-----|----------|-----|----------|-----|----------|-----|-----------|-----|-----------|-----|-----------|-----|
| 400 °C  | 295.5    | 0   | 0.018    | 35  | 0.1869   | 0   | 1.493    | 3   | 0.000673  | 0   | 0.000139  | 0   | 0.000264  | 0   |
| 500 °C  | 295.5    | 0   | 0.018    | 35  | 0.1869   | 0   | 1.493    | 3   | 0.000673  | 0   | 0.000139  | 0   | 0.000264  | 0   |
| 600 °C  | 295.5    | 0   | 0.018    | 35  | 0.1869   | 0   | 1.493    | 3   | 0.000673  | 0   | 0.000139  | 0   | 0.000264  | 0   |
| 700 °C  | 295.5    | 0   | 0.018    | 35  | 0.1869   | 0   | 1.493    | 3   | 0.000673  | 0   | 0.000139  | 0   | 0.000264  | 0   |
| 800 °C  | 295.5    | 0   | 0.018    | 35  | 0.1869   | 0   | 1.493    | 3   | 0.000673  | 0   | 0.000139  | 0   | 0.000264  | 0   |
| 900 °C  | 295.5    | 0   | 0.018    | 35  | 0.1869   | 0   | 1.493    | 3   | 0.000673  | 0   | 0.000139  | 0   | 0.000264  | 0   |
| 1000 °C | 295.5    | 0   | 0.018    | 35  | 0.1869   | 0   | 1.493    | 3   | 0.000673  | 0   | 0.000139  | 0   | 0.000264  | 0   |
| 1100 °C | 295.5    | 0   | 0.018    | 35  | 0.1869   | 0   | 1.493    | 3   | 0.000673  | 0   | 0.000139  | 0   | 0.000264  | 0   |
| 1200 °C | 295.5    | 0   | 0.018    | 35  | 0.1869   | 0   | 1.493    | 3   | 0.000673  | 0   | 0.000139  | 0   | 0.000264  | 0   |
| 1300 °C | 295.5    | 0   | 0.018    | 35  | 0.1869   | 0   | 1.493    | 3   | 0.000673  | 0   | 0.000139  | 0   | 0.000264  | 0   |
| 1400 °C | 295.5    | 0   | 0.018    | 35  | 0.1869   | 0   | 1.493    | 3   | 0.000673  | 0   | 0.000139  | 0   | 0.000264  | 0   |



| 40/39(k) | %1σ | 38/39(k) | %1σ | 36/38(cl) | %1σ | K/Ca | %1σ | K/Cl | %1σ | Ca/Cl | %1σ |
|----------|-----|----------|-----|-----------|-----|------|-----|------|-----|-------|-----|
| 0.00101  | 0   | 0.01138  | 0   | 0         | 0   | 0.43 | 0   | 0    | 0   | 0     | 0   |
| 0.00101  | 0   | 0.01138  | 0   | 0         | 0   | 0.43 | 0   | 0    | 0   | 0     | 0   |
| 0.00101  | 0   | 0.01138  | 0   | 0         | 0   | 0.43 | 0   | 0    | 0   | 0     | 0   |
| 0.00101  | 0   | 0.01138  | 0   | 0         | 0   | 0.43 | 0   | 0    | 0   | 0     | 0   |
| 0.00101  | 0   | 0.01138  | 0   | 0         | 0   | 0.43 | 0   | 0    | 0   | 0     | 0   |
| 0.00101  | 0   | 0.01138  | 0   | 0         | 0   | 0.43 | 0   | 0    | 0   | 0     | 0   |
| 0.00101  | 0   | 0.01138  | 0   | 0         | 0   | 0.43 | 0   | 0    | 0   | 0     | 0   |
| 0.00101  | 0   | 0.01138  | 0   | 0         | 0   | 0.43 | 0   | 0    | 0   | 0     | 0   |
| 0.00101  | 0   | 0.01138  | 0   | 0         | 0   | 0.43 | 0   | 0    | 0   | 0     | 0   |
| 0.00101  | 0   | 0.01138  | 0   | 0         | 0   | 0.43 | 0   | 0    | 0   | 0     | 0   |
| 0.00101  | 0   | 0.01138  | 0   | 0         | 0   | 0.43 | 0   | 0    | 0   | 0     | 0   |
| 0.00101  | 0   | 0.01138  | 0   | 0         | 0   | 0.43 | 0   | 0    | 0   | 0     | 0   |
| 0.00101  | 0   | 0.01138  | 0   | 0         | 0   | 0.43 | 0   | 0    | 0   | 0     | 0   |
| 0.00101  | 0   | 0.01138  | 0   | 0         | 0   | 0.43 | 0   | 0    | 0   | 0     | 0   |

#### Incremental Heating

|        |         |   |
|--------|---------|---|
| 10C445 | 400 °C  | ✓ |
| 10C446 | 500 °C  | ✓ |
| 10C447 | 600 °C  | ✓ |
| 10C449 | 700 °C  | ✓ |
| 10C450 | 800 °C  | ✓ |
| 10C451 | 900 °C  | ✓ |
| 10C453 | 1000 °C | ✓ |
| 10C454 | 1100 °C | ✓ |
| 10C455 | 1200 °C | ✓ |
| 10C456 | 1300 °C |   |
| 10C458 | 1400 °C |   |

Σ

#### Information on Analysis

CR-462  
groundmass  
Steens basalt  
jh

Project = Camp  
Irradiation = OSU1D10  
J = 0.0015900 ± 0.0000040  
FCT-3 = 28.030 ± 0.003 Ma

| 36Ar(a)  | 37Ar(ca) | 38Ar(cl) | 39Ar(k)  | 40Ar(r)  | Age $\pm 2\sigma$<br>(Ma) | 40Ar(r)<br>(%) | 39Ar(k)<br>(%) | K/Ca $\pm 2\sigma$ | Normal<br>Isochron |
|----------|----------|----------|----------|----------|---------------------------|----------------|----------------|--------------------|--------------------|
| 0.003453 | 0.007936 | 0.000034 | 0.002326 | 0.010149 | 12.48 $\pm$ 17.62         | 0.98           | 3.54           | 0.126 $\pm$ 0.003  | 10C445 400 °C      |
| 0.003155 | 0.013745 | 0.000038 | 0.005635 | 0.029451 | 14.93 $\pm$ 4.66          | 3.06           | 8.59           | 0.176 $\pm$ 0.003  | 10C446 500 °C      |
| 0.002628 | 0.068113 | 0.000029 | 0.014759 | 0.082207 | 15.91 $\pm$ 2.29          | 9.57           | 22.49          | 0.093 $\pm$ 0.001  | 10C447 600 °C      |
| 0.001222 | 0.116628 | 0.000018 | 0.017610 | 0.104144 | 16.88 $\pm$ 1.30          | 22.38          | 26.83          | 0.065 $\pm$ 0.001  | 10C449 700 °C      |
| 0.000491 | 0.093789 | 0.000018 | 0.012492 | 0.071788 | 16.41 $\pm$ 2.05          | 33.09          | 19.04          | 0.057 $\pm$ 0.001  | 10C450 800 °C      |
| 0.000239 | 0.052151 | 0.000000 | 0.005521 | 0.029372 | 15.20 $\pm$ 2.83          | 29.38          | 8.41           | 0.046 $\pm$ 0.001  | 10C451 900 °C      |
| 0.000168 | 0.043455 | 0.000000 | 0.003242 | 0.018885 | 16.63 $\pm$ 1.78          | 27.61          | 4.94           | 0.032 $\pm$ 0.001  | 10C453 1000 °C     |
| 0.000084 | 0.023964 | 0.000015 | 0.001170 | 0.006553 | 16.00 $\pm$ 9.97          | 20.83          | 1.78           | 0.021 $\pm$ 0.001  | 10C454 1100 °C     |
| 0.000085 | 0.038930 | 0.000000 | 0.001287 | 0.007254 | 16.10 $\pm$ 8.24          | 22.48          | 1.96           | 0.014 $\pm$ 0.000  | 10C455 1200 °C     |
| 0.000044 | 0.041579 | 0.000019 | 0.000991 | 0.010958 | 31.43 $\pm$ 22.45         | 45.75          | 1.51           | 0.010 $\pm$ 0.000  | 10C456 1300 °C     |
| 0.000052 | 0.027434 | 0.000000 | 0.000594 | 0.000006 | 0.03 $\pm$ 25.83          | 0.04           | 0.90           | 0.009 $\pm$ 0.000  | 10C458 1400 °C     |

0.011620 0.527724 0.000171 0.065627 0.370767

| Results          | 40(r)/39(k) $\pm 2\sigma$          | Age $\pm 2\sigma$<br>(Ma)                                                                   | MSWD                   | 39Ar(k)<br>(%,n)                                         | K/Ca $\pm 2\sigma$ | Results    |
|------------------|------------------------------------|---------------------------------------------------------------------------------------------|------------------------|----------------------------------------------------------|--------------------|------------|
| Weighted Plateau | 5.7495 $\pm$ 0.2841<br>$\pm$ 4.94% | 16.42 $\pm$ 0.81<br>$\pm$ 4.94%<br>External Error $\pm$ 0.85<br>Analytical Error $\pm$ 0.81 | 0.27<br>2.31<br>1.0000 | 97.58<br>9<br>Statistical T Ratio<br>Error Magnification | 0.029 $\pm$ 0.017  | Isochron   |
| Total Fusion Age | 5.6496 $\pm$ 0.4132<br>$\pm$ 7.31% | 16.13 $\pm$ 1.18<br>$\pm$ 7.30%<br>External Error $\pm$ 1.21<br>Analytical Error $\pm$ 1.17 |                        | 11                                                       | 0.053 $\pm$ 0.000  | Statistics |

| 39(k)/36(a) $\pm 2\sigma$ |                 | 40(a+r)/36(a) $\pm 2\sigma$ | r.i.   | Inverse Isochron |         | 39(k)/40(a+r) $\pm 2\sigma$ |                         |
|---------------------------|-----------------|-----------------------------|--------|------------------|---------|-----------------------------|-------------------------|
| ✓                         | 0.7 $\pm$ 0.0   | 298.4 $\pm$ 4.2             | 0.6839 | 10C445           | 400 °C  | ✓                           | 0.002257 $\pm$ 0.000032 |
| ✓                         | 1.8 $\pm$ 0.0   | 304.8 $\pm$ 3.0             | 0.8156 | 10C446           | 500 °C  | ✓                           | 0.005860 $\pm$ 0.000039 |
| ✓                         | 5.6 $\pm$ 0.1   | 326.8 $\pm$ 5.0             | 0.9791 | 10C447           | 600 °C  | ✓                           | 0.017184 $\pm$ 0.000054 |
| ✓                         | 14.4 $\pm$ 0.3  | 380.7 $\pm$ 8.5             | 0.9873 | 10C449           | 700 °C  | ✓                           | 0.037842 $\pm$ 0.000135 |
| ✓                         | 25.4 $\pm$ 1.6  | 441.7 $\pm$ 27.4            | 0.9958 | 10C450           | 800 °C  | ✓                           | 0.057590 $\pm$ 0.000328 |
| ✓                         | 23.1 $\pm$ 1.8  | 418.5 $\pm$ 32.5            | 0.9886 | 10C451           | 900 °C  | ✓                           | 0.055230 $\pm$ 0.000650 |
| ✓                         | 19.3 $\pm$ 0.8  | 408.2 $\pm$ 16.6            | 0.9649 | 10C453           | 1000 °C | ✓                           | 0.047402 $\pm$ 0.000524 |
| ✓                         | 13.9 $\pm$ 2.3  | 373.3 $\pm$ 61.4            | 0.9811 | 10C454           | 1100 °C | ✓                           | 0.037190 $\pm$ 0.001206 |
| ✓                         | 15.2 $\pm$ 2.3  | 381.2 $\pm$ 56.8            | 0.9939 | 10C455           | 1200 °C | ✓                           | 0.039884 $\pm$ 0.000659 |
|                           | 22.5 $\pm$ 13.7 | 544.7 $\pm$ 330.7           | 0.9992 | 10C456           | 1300 °C |                             | 0.041391 $\pm$ 0.001027 |
|                           | 11.5 $\pm$ 4.0  | 295.6 $\pm$ 103.7           | 0.9982 | 10C458           | 1400 °C |                             | 0.038928 $\pm$ 0.000824 |

| 40(a)/36(a) ± 2σ                                |  | 40(r)/39(k) ± 2σ                                       | Age ± 2σ<br>(Ma)                                                            | MSWD                                  | Results    | 40(a)/36(a) ± 2σ                                |  |
|-------------------------------------------------|--|--------------------------------------------------------|-----------------------------------------------------------------------------|---------------------------------------|------------|-------------------------------------------------|--|
| 294.4582 ± 2.5045<br>± 0.85%                    |  | 5.8376 ± 0.3619<br>± 6.20%                             | 16.67 ± 1.03<br>± 6.19%<br>External Error ± 1.07<br>Analytical Error ± 1.03 | 0.21                                  | Isochron   | 294.4385 ± 2.5061<br>± 0.85%                    |  |
| Statistical F Ratio<br>Error Magnification<br>n |  | Convergence<br>Number of Iterations<br>Calculated Line |                                                                             | 0.0000000493<br>13<br>Weighted York-2 | Statistics | Statistical F Ratio<br>Error Magnification<br>n |  |
| 2.01<br>1.0000<br>9                             |  |                                                        |                                                                             |                                       |            | 2.01<br>1.0000<br>9                             |  |

| 36(a)/40(a+r) ± 2σ  |  |  | r.i.   | Degassing Patterns |         |   | 36Ar(a)  | 36Ar(c)  | 36Ar(ca) | 36Ar(cl) |
|---------------------|--|--|--------|--------------------|---------|---|----------|----------|----------|----------|
| 0.003351 ± 0.000047 |  |  | 0.0436 | 10C445             | 400 °C  | ✓ | 0.003453 | 0.000000 | 0.000002 | 0.000000 |
| 0.003280 ± 0.000032 |  |  | 0.0868 | 10C446             | 500 °C  | ✓ | 0.003155 | 0.000000 | 0.000004 | 0.000000 |
| 0.003060 ± 0.000047 |  |  | 0.0235 | 10C447             | 600 °C  | ✓ | 0.002628 | 0.000000 | 0.000018 | 0.000000 |
| 0.002627 ± 0.000059 |  |  | 0.0325 | 10C449             | 700 °C  | ✓ | 0.001222 | 0.000000 | 0.000031 | 0.000000 |
| 0.002264 ± 0.000140 |  |  | 0.0311 | 10C450             | 800 °C  | ✓ | 0.000491 | 0.000000 | 0.000025 | 0.000000 |
| 0.002390 ± 0.000185 |  |  | 0.0234 | 10C451             | 900 °C  | ✓ | 0.000239 | 0.000000 | 0.000014 | 0.000000 |
| 0.002450 ± 0.000100 |  |  | 0.0073 | 10C453             | 1000 °C | ✓ | 0.000168 | 0.000000 | 0.000011 | 0.000000 |
| 0.002679 ± 0.000441 |  |  | 0.0011 | 10C454             | 1100 °C | ✓ | 0.000084 | 0.000000 | 0.000006 | 0.000000 |
| 0.002623 ± 0.000391 |  |  | 0.0110 | 10C455             | 1200 °C | ✓ | 0.000085 | 0.000000 | 0.000010 | 0.000000 |
| 0.001836 ± 0.001115 |  |  | 0.0003 | 10C456             | 1300 °C |   | 0.000044 | 0.000000 | 0.000011 | 0.000000 |
| 0.003383 ± 0.001186 |  |  | 0.0171 | 10C458             | 1400 °C |   | 0.000052 | 0.000000 | 0.000007 | 0.000000 |
|                     |  |  |        | Σ                  |         |   | 0.011620 | 0.000000 | 0.000139 | 0.000000 |
|                     |  |  |        | Σ                  |         |   |          |          |          | 0.011760 |

| 40(r)/39(k) ± 2σ        |  | Age ± 2σ (Ma)           | MSWD |
|-------------------------|--|-------------------------|------|
| 5.8454 ± 0.3621 ± 6.19% |  | 16.69 ± 1.03 ± 6.19%    | 0.20 |
|                         |  | External Error ± 1.07   |      |
|                         |  | Analytical Error ± 1.03 |      |
| Convergence             |  | 0.0000000028            |      |
| Number of Iterations    |  | 4                       |      |
| Calculated Line         |  | Weighted York-2         |      |

| 37Ar(ca) | 38Ar(a)  | 38Ar(c)  | 38Ar(k)  | 38Ar(ca) | 38Ar(cl) | 39Ar(k)  | 39Ar(ca) | 40Ar(r)  | 40Ar(a)  | 40Ar(c)  |
|----------|----------|----------|----------|----------|----------|----------|----------|----------|----------|----------|
| 0.007936 | 0.000645 | 0.000000 | 0.000026 | 0.000001 | 0.000034 | 0.002326 | 0.000005 | 0.010149 | 1.020278 | 0.000000 |
| 0.013745 | 0.000590 | 0.000000 | 0.000064 | 0.000002 | 0.000038 | 0.005635 | 0.000009 | 0.029451 | 0.932229 | 0.000000 |
| 0.068113 | 0.000491 | 0.000000 | 0.000168 | 0.000009 | 0.000029 | 0.014759 | 0.000046 | 0.082207 | 0.776677 | 0.000000 |
| 0.116628 | 0.000228 | 0.000000 | 0.000200 | 0.000016 | 0.000018 | 0.017610 | 0.000078 | 0.104144 | 0.361208 | 0.000000 |
| 0.093789 | 0.000092 | 0.000000 | 0.000142 | 0.000013 | 0.000018 | 0.012492 | 0.000063 | 0.071788 | 0.145128 | 0.000000 |
| 0.052151 | 0.000045 | 0.000000 | 0.000063 | 0.000007 | 0.000000 | 0.005521 | 0.000035 | 0.029372 | 0.070591 | 0.000000 |
| 0.043455 | 0.000031 | 0.000000 | 0.000037 | 0.000006 | 0.000000 | 0.003242 | 0.000029 | 0.018885 | 0.049514 | 0.000000 |
| 0.023964 | 0.000016 | 0.000000 | 0.000013 | 0.000003 | 0.000015 | 0.001170 | 0.000016 | 0.006553 | 0.024899 | 0.000000 |
| 0.038930 | 0.000016 | 0.000000 | 0.000015 | 0.000005 | 0.000000 | 0.001287 | 0.000026 | 0.007254 | 0.025010 | 0.000000 |
| 0.041579 | 0.000008 | 0.000000 | 0.000011 | 0.000006 | 0.000019 | 0.000991 | 0.000028 | 0.010958 | 0.012995 | 0.000000 |
| 0.027434 | 0.000010 | 0.000000 | 0.000007 | 0.000004 | 0.000000 | 0.000594 | 0.000018 | 0.000006 | 0.015242 | 0.000000 |
| 0.527724 | 0.002172 | 0.000000 | 0.000747 | 0.000073 | 0.000171 | 0.065627 | 0.000355 | 0.370767 | 3.433772 | 0.000000 |
| 0.527724 |          |          |          |          | 0.003163 |          | 0.065982 |          |          |          |

| 40Ar(k)  | Additional Parameters |         |   | 40(r)/39(k) | 1 $\sigma$ | 40(r+a) | 1 $\sigma$ | 40Ar/39Ar | 1 $\sigma$ | 37Ar/39Ar | 1 $\sigma$ |
|----------|-----------------------|---------|---|-------------|------------|---------|------------|-----------|------------|-----------|------------|
| 0.000002 | 10C445                | 400 °C  | ✓ | 4.364106    | 3.09230    | 1.03043 | 0.00153    | 442.07482 | 3.17051    | 3.40477   | 0.03809    |
| 0.000006 | 10C446                | 500 °C  | ✓ | 5.226172    | 0.81890    | 0.96168 | 0.00115    | 170.37707 | 0.56374    | 2.43505   | 0.01735    |
| 0.000015 | 10C447                | 600 °C  | ✓ | 5.570064    | 0.40192    | 0.85888 | 0.00046    | 58.01566  | 0.09121    | 4.60079   | 0.03181    |
| 0.000018 | 10C449                | 700 °C  | ✓ | 5.913907    | 0.22929    | 0.46535 | 0.00037    | 26.30914  | 0.04690    | 6.59343   | 0.04387    |
| 0.000013 | 10C450                | 800 °C  | ✓ | 5.746642    | 0.36134    | 0.21692 | 0.00036    | 17.27782  | 0.04907    | 7.47010   | 0.05269    |
| 0.000006 | 10C451                | 900 °C  | ✓ | 5.320021    | 0.49759    | 0.09996 | 0.00023    | 17.99274  | 0.10525    | 9.38642   | 0.07635    |
| 0.000003 | 10C453                | 1000 °C | ✓ | 5.824555    | 0.31243    | 0.06840 | 0.00006    | 20.90847  | 0.11449    | 13.28278  | 0.12468    |
| 0.000001 | 10C454                | 1100 °C | ✓ | 5.602006    | 1.75251    | 0.03145 | 0.00004    | 26.52402  | 0.42413    | 20.20887  | 0.37375    |
| 0.000001 | 10C455                | 1200 °C | ✓ | 5.637387    | 1.44936    | 0.03226 | 0.00008    | 24.57350  | 0.19938    | 29.64863  | 0.29156    |
| 0.000001 | 10C456                | 1300 °C |   | 11.052433   | 3.98138    | 0.02395 | 0.00002    | 23.49759  | 0.28363    | 40.78684  | 0.56628    |
| 0.000001 | 10C458                | 1400 °C |   | 0.010552    | 4.50245    | 0.01525 | 0.00009    | 24.91436  | 0.25782    | 44.82378  | 0.48280    |
| 0.000066 |                       |         |   |             |            |         |            |           |            |           |            |
| 3.804605 |                       |         |   |             |            |         |            |           |            |           |            |

| $^{36}\text{Ar}/^{39}\text{Ar}$ | $1\sigma$ | $^{37}\text{Ar}$<br>(decay) | $^{39}\text{Ar}$<br>(decay) | $^{40}\text{Ar}$<br>(moles) |
|---------------------------------|-----------|-----------------------------|-----------------------------|-----------------------------|
| 1.48218                         | 0.01457   | 1.73512557                  | 1.00019688                  | 2.061E-13                   |
| 0.55955                         | 0.00319   | 1.73564925                  | 1.00019699                  | 1.923E-13                   |
| 0.17875                         | 0.00138   | 1.73617309                  | 1.00019710                  | 1.718E-13                   |
| 0.07085                         | 0.00078   | 1.73722124                  | 1.00019731                  | 9.307E-14                   |
| 0.04109                         | 0.00122   | 1.73779323                  | 1.00019743                  | 4.339E-14                   |
| 0.04547                         | 0.00168   | 1.73831772                  | 1.00019754                  | 1.999E-14                   |
| 0.05472                         | 0.00108   | 1.73936717                  | 1.00019775                  | 1.368E-14                   |
| 0.07639                         | 0.00597   | 1.74029789                  | 1.00019795                  | 6.290E-15                   |
| 0.07229                         | 0.00483   | 1.74084701                  | 1.00019806                  | 6.453E-15                   |
| 0.05391                         | 0.01311   | 1.74137242                  | 1.00019817                  | 4.791E-15                   |
| 0.09611                         | 0.01479   | 1.74237592                  | 1.00019837                  | 3.050E-15                   |

10C445.AGE >>> CR-462 >>> CAMP PROJECT

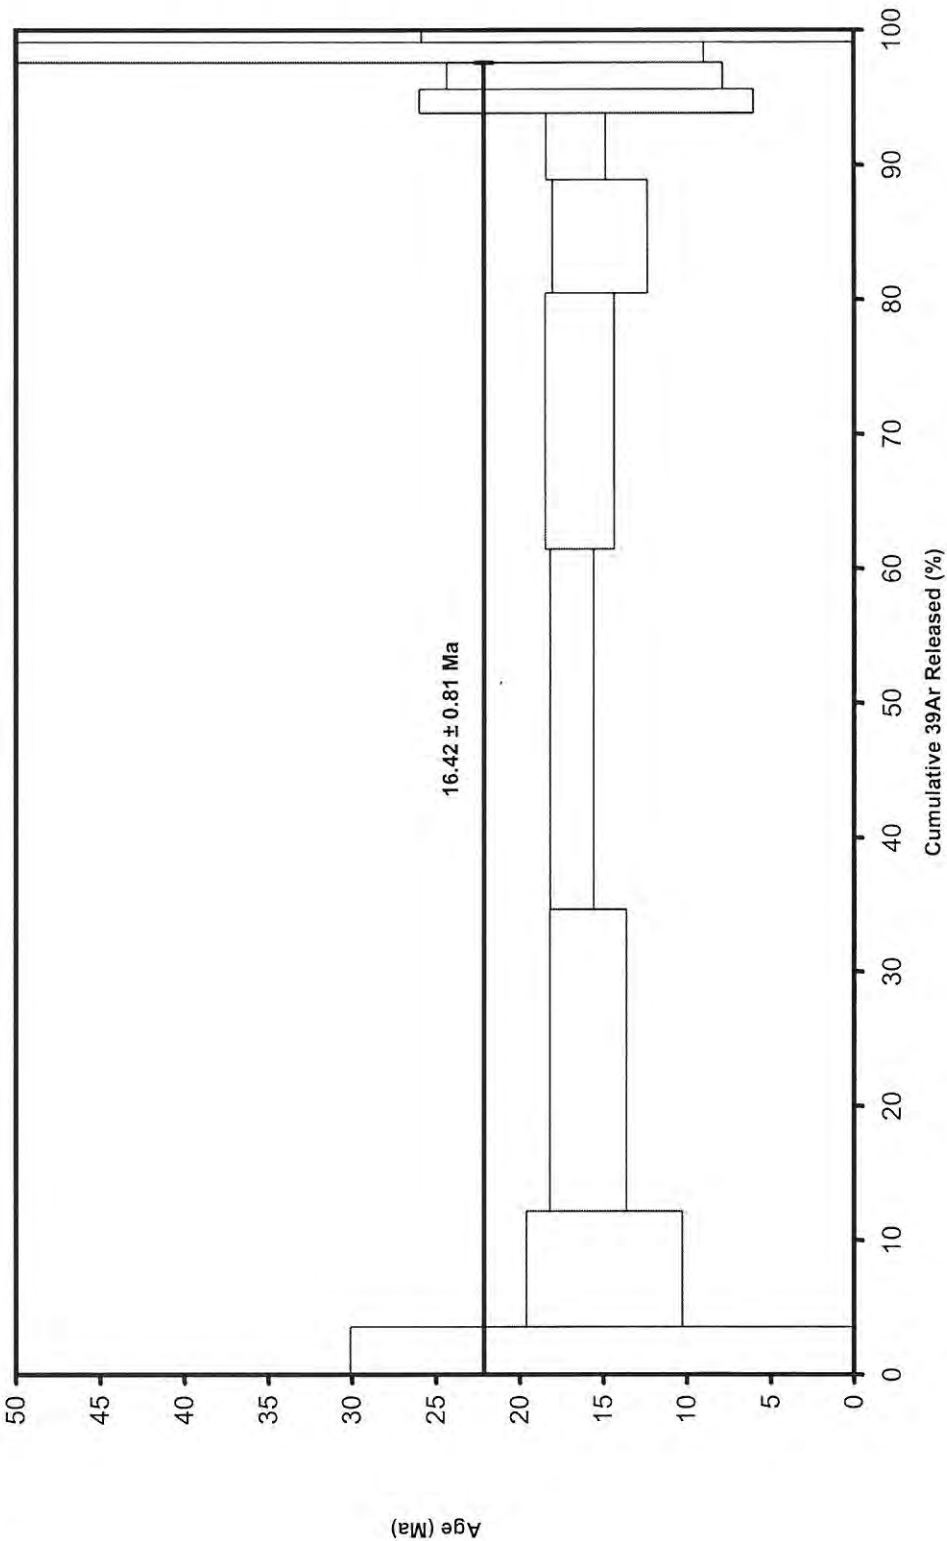

**Ar-Ages in Ma**  
WEIGHTED PLATEAU  
16.42 ± 0.81  
TOTAL FUSION  
16.13 ± 1.18  
NORMAL ISOCHRON  
16.67 ± 1.03  
INVERSE ISOCHRON  
16.69 ± 1.03  
MSWD  
0.27

**Sample Info**  
groundmass  
Steens basalt  
jh  
IRR = OSU1D10  
J = 0.0015900 ±

DR2013250 Camp



# 10C445.AGE >>> CR-462 >>> CAMP PROJECT

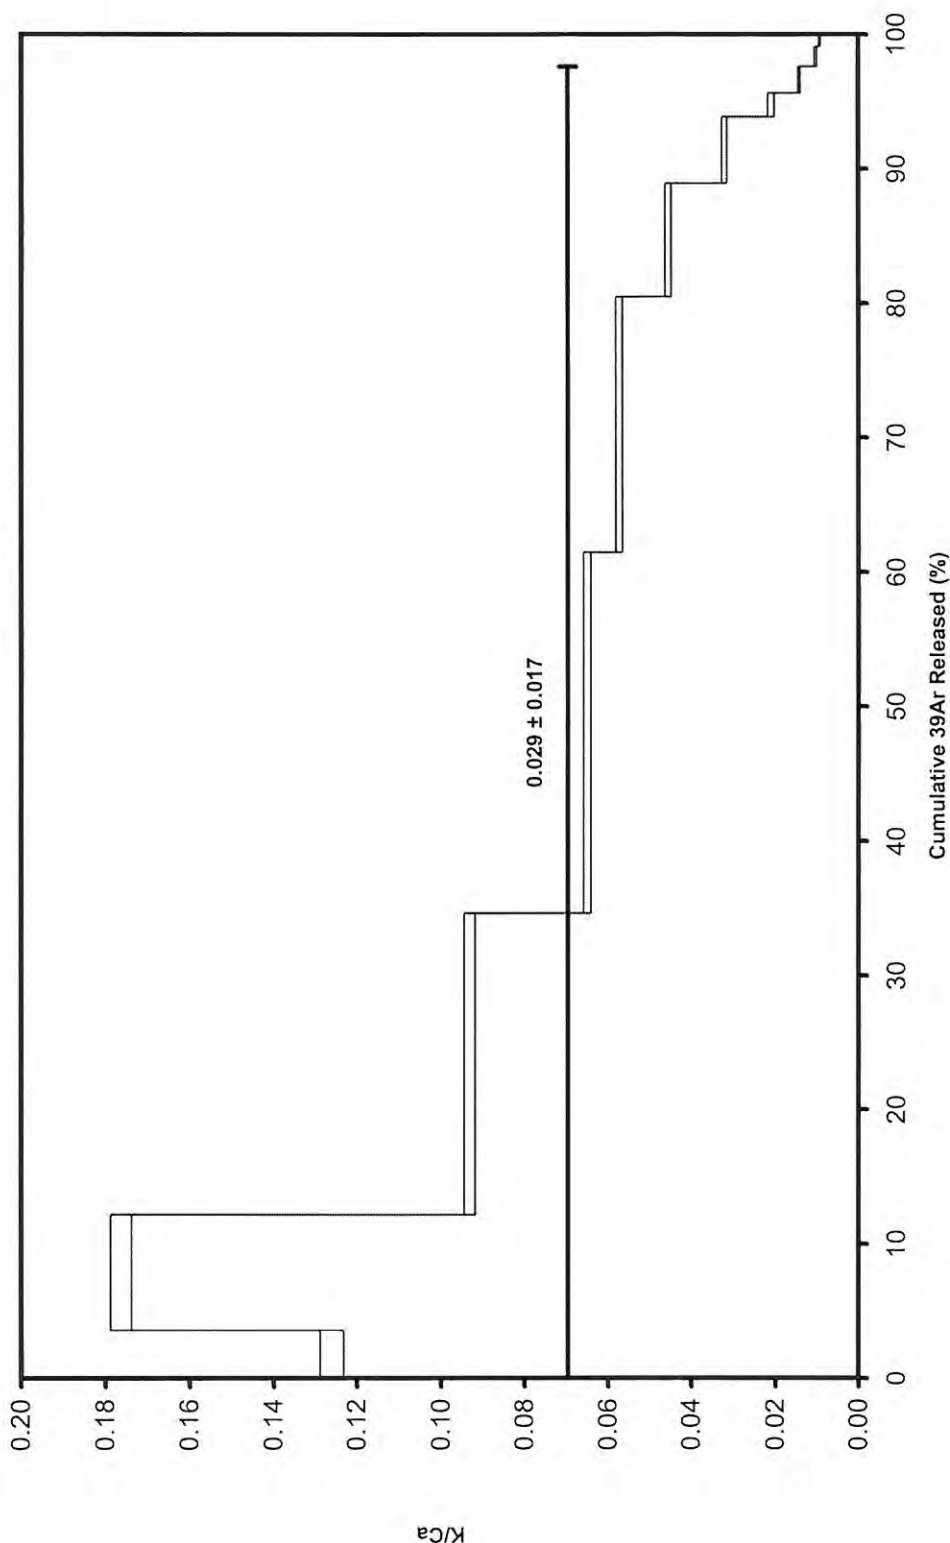

**Ar-Ages in Ma**

WEIGHTED PLATEAU  
16.42 ± 0.81

TOTAL FUSION  
16.13 ± 1.18

NORMAL ISOCHRON  
16.67 ± 1.03

INVERSE ISOCHRON  
16.69 ± 1.03

**Sample Info**

groundmass  
Steens basalt  
jh

IRR = OSU1D10  
J = 0.0015900 ±

DR2013250 Camp

10C445.AGE >>> CR-462 >>> CAMP PROJECT

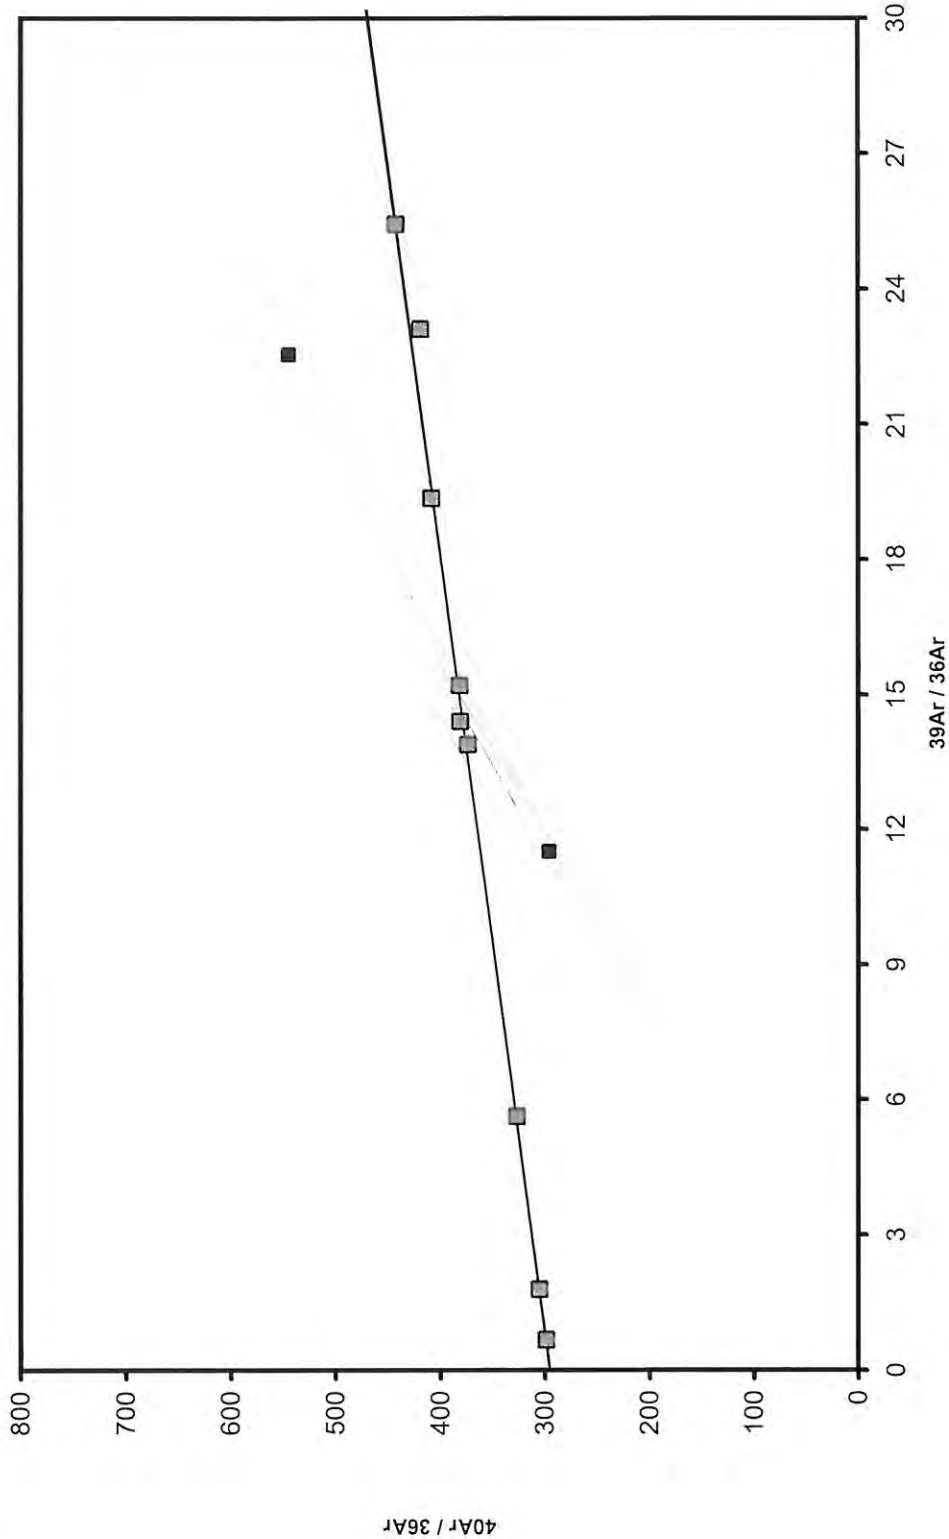

**Ar-Ages in Ma**  
**WEIGHTED PLATEAU**  
 16.42  $\pm$  0.81  
**TOTAL FUSION**  
 16.13  $\pm$  1.18  
**NORMAL ISOCHRON**  
 16.67  $\pm$  1.03  
**INVERSE ISOCHRON**  
 16.69  $\pm$  1.03  
**MSWD**  
 0.21

**Sample Info**  
 groundmass  
 Steens basalt  
 jh  
**IRR = OSU1D10**  
**J = 0.0015900  $\pm$**

DR2013250 Camp

10C445.AGE >>> CR-462 >>> CAMP PROJECT

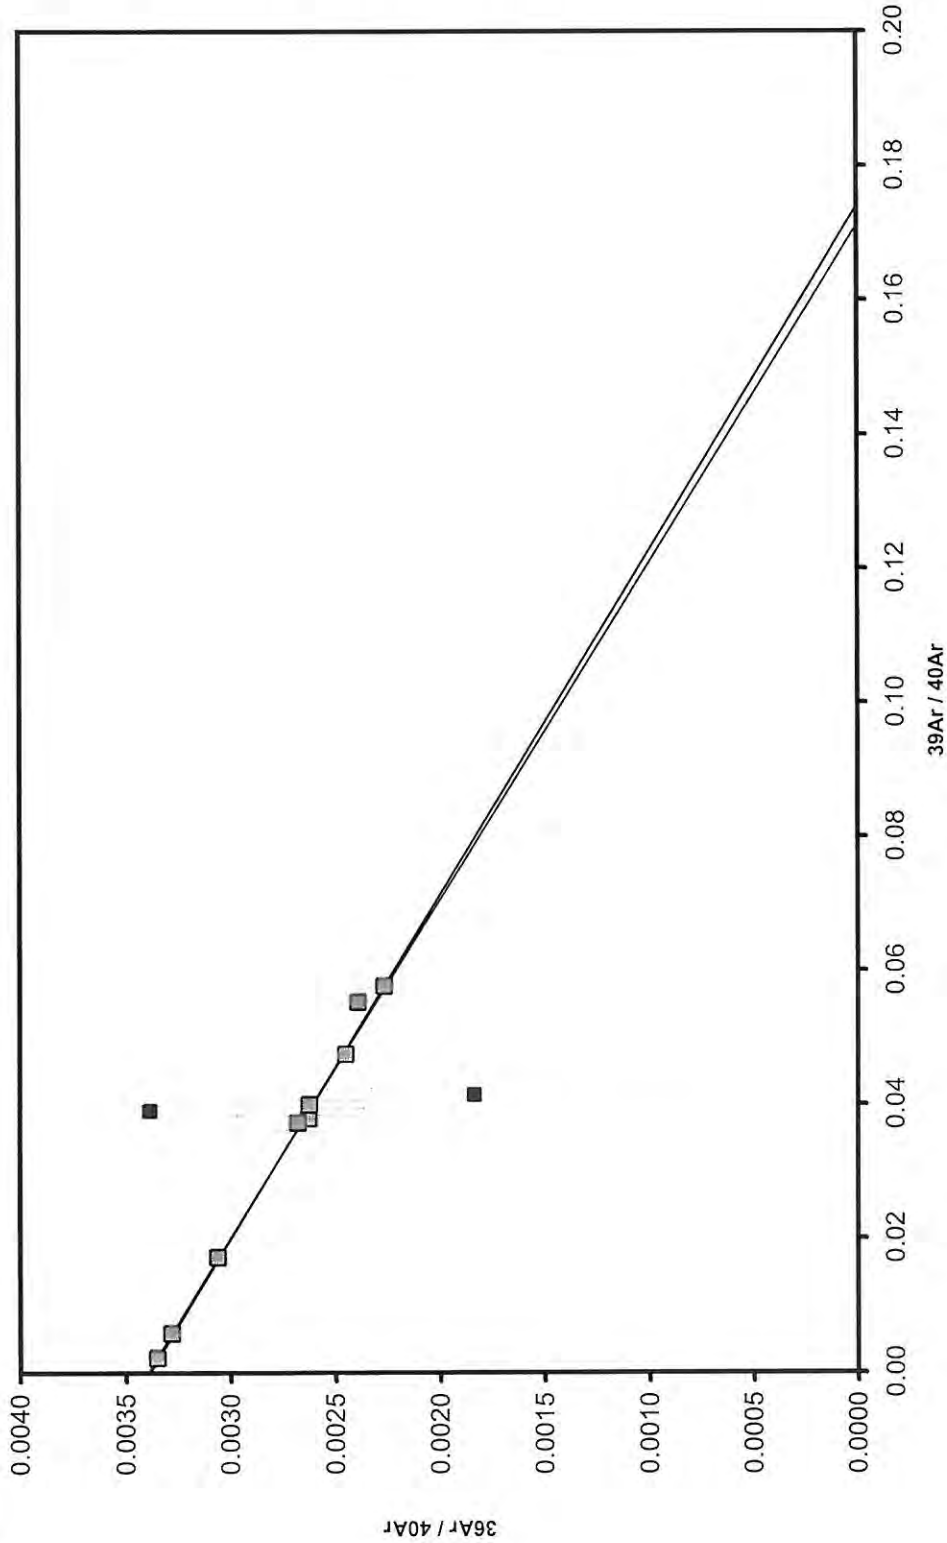

**Ar-Ages in Ma**

WEIGHTED PLATEAU  
16.42  $\pm$  0.81

TOTAL FUSION  
16.13  $\pm$  1.18

NORMAL ISOCHRON  
16.67  $\pm$  1.03

INVERSE ISOCHRON  
16.69  $\pm$  1.03

MSWD  
0.20

**Sample Info**

groundmass  
Steens basalt  
jh

IRR = OSU1D10  
J = 0.0015900  $\pm$

DR2013250 Camp

Age Data - Sample JS07-1

| Procedure |         | 36Ar     | 1σ       | 37Ar     | 1σ       | 38Ar     | 1σ       | 39Ar     | 1σ       | 40Ar     | 1σ       |
|-----------|---------|----------|----------|----------|----------|----------|----------|----------|----------|----------|----------|
| Blanks    |         |          |          |          |          |          |          |          |          |          |          |
| 07C2335   | 500 °C  | 0.000023 | 0.000001 | 0.000027 | 0.000008 | 0.000015 | 0.000009 | 0.000046 | 0.000006 | 0.007514 | 0.000034 |
| 07C2336   | 600 °C  | 0.000027 | 0.000003 | 0.000044 | 0.000106 | 0.000011 | 0.000005 | 0.000053 | 0.000007 | 0.007870 | 0.000428 |
| 07C2337   | 700 °C  | 0.000029 | 0.000003 | 0.000075 | 0.000106 | 0.000009 | 0.000005 | 0.000059 | 0.000007 | 0.008116 | 0.000428 |
| 07C2339   | 800 °C  | 0.000034 | 0.000003 | 0.000153 | 0.000106 | 0.000007 | 0.000005 | 0.000070 | 0.000007 | 0.008847 | 0.000428 |
| 07C2340   | 900 °C  | 0.000037 | 0.000003 | 0.000200 | 0.000106 | 0.000007 | 0.000005 | 0.000076 | 0.000007 | 0.009333 | 0.000428 |
| 07C2341   | 975 °C  | 0.000040 | 0.000003 | 0.000254 | 0.000106 | 0.000008 | 0.000005 | 0.000082 | 0.000007 | 0.009924 | 0.000428 |
| 07C2343   | 1050 °C | 0.000046 | 0.000003 | 0.000376 | 0.000106 | 0.000012 | 0.000005 | 0.000093 | 0.000007 | 0.011303 | 0.000428 |
| 07C2344   | 1125 °C | 0.000049 | 0.000003 | 0.000445 | 0.000106 | 0.000015 | 0.000005 | 0.000099 | 0.000007 | 0.012112 | 0.000428 |
| 07C2345   | 1200 °C | 0.000052 | 0.000003 | 0.000519 | 0.000106 | 0.000019 | 0.000005 | 0.000104 | 0.000007 | 0.013002 | 0.000428 |
| 07C2346   | 1275 °C | 0.000056 | 0.000003 | 0.000599 | 0.000106 | 0.000023 | 0.000005 | 0.000110 | 0.000007 | 0.013972 | 0.000428 |
| 07C2348   | 1350 °C | 0.000063 | 0.000003 | 0.000778 | 0.000106 | 0.000035 | 0.000005 | 0.000122 | 0.000007 | 0.016200 | 0.000428 |
| 07C2349   | 1400 °C | 0.000067 | 0.000003 | 0.000874 | 0.000106 | 0.000041 | 0.000005 | 0.000127 | 0.000007 | 0.017413 | 0.000428 |

These calculations are all relative to the FCT-3 biotite monitor age at 28.0 Ma, and have not yet been recalculated to the new 28.201 Ma mor

| Intercept<br>Values |         | 36Ar     | 1 $\sigma$ | r2     |               | 37Ar     | 1 $\sigma$ | r2     |                   |
|---------------------|---------|----------|------------|--------|---------------|----------|------------|--------|-------------------|
| 07C2335             | 500 °C  | 0.000078 | 0.000005   | 0.0787 | LIN #         | 0.003463 | 0.000018   | 0.9312 | LIN # 1 2 7       |
| 07C2336             | 600 °C  | 0.000166 | 0.000003   | 0.0039 | LIN #         | 0.054444 | 0.000192   | 0.9832 | EXP # 1 4         |
| 07C2337             | 700 °C  | 0.000138 | 0.000004   | 0.2528 | LIN # 1 10    | 0.111263 | 0.000284   | 0.9921 | EXP # 1 2 4 7     |
| 07C2339             | 800 °C  | 0.000228 | 0.000006   | 0.1602 | LIN #         | 0.246915 | 0.001274   | 0.9604 | EXP # 1 3 4       |
| 07C2340             | 900 °C  | 0.000242 | 0.000007   | 0.6949 | LIN # 1 3 7 8 | 0.301018 | 0.000168   | 0.9999 | LIN # 1 3 4 5 6 7 |
| 07C2341             | 975 °C  | 0.000276 | 0.000004   | 0.3588 | LIN # 1 5     | 0.274667 | 0.000495   | 0.9920 | EXP # 1 5 6       |
| 07C2343             | 1050 °C | 0.000301 | 0.000004   | 0.0619 | LIN # 1 7     | 0.403944 | 0.000938   | 0.9861 | LIN # 1 8         |
| 07C2344             | 1125 °C | 0.000271 | 0.000003   | 0.0016 | LIN # 1       | 0.327035 | 0.001715   | 0.9434 | LIN # 1           |
| 07C2345             | 1200 °C | 0.000268 | 0.000008   | 0.0035 | LIN # 1 2 4   | 0.276667 | 0.000912   | 0.9711 | LIN # 1 6 10      |
| 07C2346             | 1275 °C | 0.000282 | 0.000004   | 0.0254 | LIN #         | 0.288694 | 0.001147   | 0.9792 | LIN # 1 3 4       |
| 07C2348             | 1350 °C | 0.000228 | 0.000003   | 0.5116 | LIN # 4 9     | 0.217349 | 0.000609   | 0.9770 | LIN # 1           |
| 07C2349             | 1400 °C | 0.000326 | 0.000007   | 0.3051 | LIN # 1 2 3 6 | 0.121440 | 0.000348   | 0.9867 | LIN # 1 5         |

nitor age of Kuiper et al.(2008).

| 38Ar     | 1 $\sigma$ | r <sup>2</sup> |             | 39Ar     | 1 $\sigma$ | r <sup>2</sup> |               |
|----------|------------|----------------|-------------|----------|------------|----------------|---------------|
| 0.000041 | 0.000006   | 0.0726         | LIN # 1 2   | 0.000768 | 0.000003   | 0.9992         | LIN # 3 8 9   |
| 0.000117 | 0.000003   | 0.7925         | LIN # 5 8 9 | 0.005923 | 0.000016   | 0.9267         | LIN # 1       |
| 0.000134 | 0.000005   | 0.6187         | LIN # 1 7   | 0.008510 | 0.000013   | 0.8155         | LIN # 3 8     |
| 0.000243 | 0.000006   | 0.4433         | LIN # 2 3 9 | 0.016229 | 0.000024   | 0.5164         | LIN # 5 7 10  |
| 0.000283 | 0.000005   | 0.0009         | LIN # 4 7   | 0.018591 | 0.000013   | 0.8493         | LIN # 1 6 10  |
| 0.000253 | 0.000006   | 0.5833         | LIN # 1 5   | 0.016755 | 0.000046   | 0.2613         | LIN # 1 4     |
| 0.000343 | 0.000008   | 0.2522         | LIN #       | 0.024544 | 0.000059   | 0.7553         | LIN # 2 6     |
| 0.000268 | 0.000004   | 0.5330         | LIN #       | 0.019674 | 0.000033   | 0.6658         | LIN # 3 4 5 6 |
| 0.000253 | 0.000006   | 0.1620         | LIN #       | 0.016572 | 0.000034   | 0.8462         | LIN # 8       |
| 0.000259 | 0.000006   | 0.6063         | LIN # 1 4 6 | 0.017273 | 0.000033   | 0.1813         | LIN # 2 4     |
| 0.000194 | 0.000004   | 0.5513         | LIN #       | 0.013041 | 0.000015   | 0.3965         | LIN # 2 3 7   |
| 0.000144 | 0.000004   | 0.3732         | LIN # 7     | 0.007267 | 0.000023   | 0.9518         | LIN # 5 8     |

| 40Ar     | 1σ       | r2     |                 | Sample Parameters | Sample  | Material |             |
|----------|----------|--------|-----------------|-------------------|---------|----------|-------------|
| 0.023881 | 0.000048 | 0.9961 | LIN # 2 9       | 07C2335           | 500 °C  | JS07-1   | plagioclase |
| 0.073297 | 0.000113 | 0.8716 | PAR #           | 07C2336           | 600 °C  | JS07-1   | plagioclase |
| 0.068665 | 0.000056 | 0.9861 | PAR # 4 9       | 07C2337           | 700 °C  | JS07-1   | plagioclase |
| 0.119474 | 0.000045 | 0.9914 | EXP # 1 3 4 6   | 07C2339           | 800 °C  | JS07-1   | plagioclase |
| 0.129422 | 0.000092 | 0.9741 | LIN # 2 4 7     | 07C2340           | 900 °C  | JS07-1   | plagioclase |
| 0.129122 | 0.000319 | 0.6195 | PAR #           | 07C2341           | 975 °C  | JS07-1   | plagioclase |
| 0.160176 | 0.000347 | 0.4959 | LIN # 7         | 07C2343           | 1050 °C | JS07-1   | plagioclase |
| 0.136393 | 0.000266 | 0.3913 | LIN # 3 6 8 10  | 07C2344           | 1125 °C | JS07-1   | plagioclase |
| 0.125433 | 0.000182 | 0.9662 | LIN # 1 2 3 5 6 | 07C2345           | 1200 °C | JS07-1   | plagioclase |
| 0.134175 | 0.000291 | 0.8570 | LIN # 1 3 4 7   | 07C2346           | 1275 °C | JS07-1   | plagioclase |
| 0.105881 | 0.000253 | 0.6697 | LIN # 2 3       | 07C2348           | 1350 °C | JS07-1   | plagioclase |
| 0.116285 | 0.000258 | 0.0051 | LIN # 1 2       | 07C2349           | 1400 °C | JS07-1   | plagioclase |

| Location      | Analyst | Temp | Standard<br>(in Ma) | %1 $\sigma$ | J        | %1 $\sigma$ |
|---------------|---------|------|---------------------|-------------|----------|-------------|
| Steens basalt | jh      | 500  | 28.03               | 0.01        | 0.001723 | 0.22        |
| Steens basalt | jh      | 600  | 28.03               | 0.01        | 0.001723 | 0.22        |
| Steens basalt | jh      | 700  | 28.03               | 0.01        | 0.001723 | 0.22        |
| Steens basalt | jh      | 800  | 28.03               | 0.01        | 0.001723 | 0.22        |
| Steens basalt | jh      | 900  | 28.03               | 0.01        | 0.001723 | 0.22        |
| Steens basalt | jh      | 975  | 28.03               | 0.01        | 0.001723 | 0.22        |
| Steens basalt | jh      | 1050 | 28.03               | 0.01        | 0.001723 | 0.22        |
| Steens basalt | jh      | 1125 | 28.03               | 0.01        | 0.001723 | 0.22        |
| Steens basalt | jh      | 1200 | 28.03               | 0.01        | 0.001723 | 0.22        |
| Steens basalt | jh      | 1275 | 28.03               | 0.01        | 0.001723 | 0.22        |
| Steens basalt | jh      | 1350 | 28.03               | 0.01        | 0.001723 | 0.22        |
| Steens basalt | jh      | 1400 | 28.03               | 0.01        | 0.001723 | 0.22        |



| MDF     | %1 $\sigma$ | Volume Ratio | Sensitivity (mol/vol) | Day | Month | Year | Hour | Min | Resist | Irradiation | Project | Standard Name | Irradiation Constants |
|---------|-------------|--------------|-----------------------|-----|-------|------|------|-----|--------|-------------|---------|---------------|-----------------------|
| 1.00378 | 0.16        | 1.0149       | 1.012E-19             | 07  | 06    | 2007 | 08   | 30  | 001    | OSU1C07     | HLP     | FCT-3         | 07C2335               |
| 1.00378 | 0.16        | 1.0152       | 1.012E-19             | 07  | 06    | 2007 | 08   | 54  | 001    | OSU1C07     | HLP     | FCT-3         | 07C2336               |
| 1.00378 | 0.16        | 1.0154       | 1.012E-19             | 07  | 06    | 2007 | 09   | 19  | 001    | OSU1C07     | HLP     | FCT-3         | 07C2337               |
| 1.00378 | 0.16        | 1.0156       | 1.012E-19             | 07  | 06    | 2007 | 10   | 09  | 001    | OSU1C07     | HLP     | FCT-3         | 07C2339               |
| 1.00378 | 0.16        | 1.0156       | 1.012E-19             | 07  | 06    | 2007 | 10   | 34  | 001    | OSU1C07     | HLP     | FCT-3         | 07C2340               |
| 1.00378 | 0.16        | 1.0156       | 1.012E-19             | 07  | 06    | 2007 | 11   | 00  | 001    | OSU1C07     | HLP     | FCT-3         | 07C2341               |
| 1.00378 | 0.16        | 1.0157       | 1.012E-19             | 07  | 06    | 2007 | 11   | 50  | 001    | OSU1C07     | HLP     | FCT-3         | 07C2343               |
| 1.00378 | 0.16        | 1.0158       | 1.012E-19             | 07  | 06    | 2007 | 12   | 15  | 001    | OSU1C07     | HLP     | FCT-3         | 07C2344               |
| 1.00378 | 0.16        | 1.0157       | 1.012E-19             | 07  | 06    | 2007 | 12   | 40  | 001    | OSU1C07     | HLP     | FCT-3         | 07C2345               |
| 1.00378 | 0.16        | 1.0156       | 1.012E-19             | 07  | 06    | 2007 | 13   | 05  | 001    | OSU1C07     | HLP     | FCT-3         | 07C2346               |
| 1.00378 | 0.16        | 1.0158       | 1.012E-19             | 07  | 06    | 2007 | 13   | 56  | 001    | OSU1C07     | HLP     | FCT-3         | 07C2348               |
| 1.00378 | 0.16        | 1.0158       | 1.012E-19             | 07  | 06    | 2007 | 14   | 21  | 001    | OSU1C07     | HLP     | FCT-3         | 07C2349               |

|         | 40/36(a) | %1σ | 40/36(c) | %1σ | 38/36(a) | %1σ | 38/36(c) | %1σ | 39/37(ca) | %1σ | 38/37(ca) | %1σ | 36/37(ca) | %1σ |
|---------|----------|-----|----------|-----|----------|-----|----------|-----|-----------|-----|-----------|-----|-----------|-----|
| 500 °C  | 295.5    | 0   | 0.018    | 35  | 0.1869   | 0   | 1.493    | 3   | 0.000673  | 0   | 0.000139  | 0   | 0.000264  | 0   |
| 600 °C  | 295.5    | 0   | 0.018    | 35  | 0.1869   | 0   | 1.493    | 3   | 0.000673  | 0   | 0.000139  | 0   | 0.000264  | 0   |
| 700 °C  | 295.5    | 0   | 0.018    | 35  | 0.1869   | 0   | 1.493    | 3   | 0.000673  | 0   | 0.000139  | 0   | 0.000264  | 0   |
| 800 °C  | 295.5    | 0   | 0.018    | 35  | 0.1869   | 0   | 1.493    | 3   | 0.000673  | 0   | 0.000139  | 0   | 0.000264  | 0   |
| 900 °C  | 295.5    | 0   | 0.018    | 35  | 0.1869   | 0   | 1.493    | 3   | 0.000673  | 0   | 0.000139  | 0   | 0.000264  | 0   |
| 975 °C  | 295.5    | 0   | 0.018    | 35  | 0.1869   | 0   | 1.493    | 3   | 0.000673  | 0   | 0.000139  | 0   | 0.000264  | 0   |
| 1050 °C | 295.5    | 0   | 0.018    | 35  | 0.1869   | 0   | 1.493    | 3   | 0.000673  | 0   | 0.000139  | 0   | 0.000264  | 0   |
| 1125 °C | 295.5    | 0   | 0.018    | 35  | 0.1869   | 0   | 1.493    | 3   | 0.000673  | 0   | 0.000139  | 0   | 0.000264  | 0   |
| 1200 °C | 295.5    | 0   | 0.018    | 35  | 0.1869   | 0   | 1.493    | 3   | 0.000673  | 0   | 0.000139  | 0   | 0.000264  | 0   |
| 1275 °C | 295.5    | 0   | 0.018    | 35  | 0.1869   | 0   | 1.493    | 3   | 0.000673  | 0   | 0.000139  | 0   | 0.000264  | 0   |
| 1350 °C | 295.5    | 0   | 0.018    | 35  | 0.1869   | 0   | 1.493    | 3   | 0.000673  | 0   | 0.000139  | 0   | 0.000264  | 0   |
| 1400 °C | 295.5    | 0   | 0.018    | 35  | 0.1869   | 0   | 1.493    | 3   | 0.000673  | 0   | 0.000139  | 0   | 0.000264  | 0   |

| 40/39(k) | %1σ | 38/39(k) | %1σ | 36/38(cl) | %1σ | K/Ca | %1σ | K/Cl | %1σ | Ca/Cl | %1σ |
|----------|-----|----------|-----|-----------|-----|------|-----|------|-----|-------|-----|
| 0.00101  | 0   | 0.01138  | 0   | 0         | 0   | 0.43 | 0   | 0    | 0   | 0     | 0   |
| 0.00101  | 0   | 0.01138  | 0   | 0         | 0   | 0.43 | 0   | 0    | 0   | 0     | 0   |
| 0.00101  | 0   | 0.01138  | 0   | 0         | 0   | 0.43 | 0   | 0    | 0   | 0     | 0   |
| 0.00101  | 0   | 0.01138  | 0   | 0         | 0   | 0.43 | 0   | 0    | 0   | 0     | 0   |
| 0.00101  | 0   | 0.01138  | 0   | 0         | 0   | 0.43 | 0   | 0    | 0   | 0     | 0   |
| 0.00101  | 0   | 0.01138  | 0   | 0         | 0   | 0.43 | 0   | 0    | 0   | 0     | 0   |
| 0.00101  | 0   | 0.01138  | 0   | 0         | 0   | 0.43 | 0   | 0    | 0   | 0     | 0   |
| 0.00101  | 0   | 0.01138  | 0   | 0         | 0   | 0.43 | 0   | 0    | 0   | 0     | 0   |
| 0.00101  | 0   | 0.01138  | 0   | 0         | 0   | 0.43 | 0   | 0    | 0   | 0     | 0   |
| 0.00101  | 0   | 0.01138  | 0   | 0         | 0   | 0.43 | 0   | 0    | 0   | 0     | 0   |
| 0.00101  | 0   | 0.01138  | 0   | 0         | 0   | 0.43 | 0   | 0    | 0   | 0     | 0   |
| 0.00101  | 0   | 0.01138  | 0   | 0         | 0   | 0.43 | 0   | 0    | 0   | 0     | 0   |
| 0.00101  | 0   | 0.01138  | 0   | 0         | 0   | 0.43 | 0   | 0    | 0   | 0     | 0   |
| 0.00101  | 0   | 0.01138  | 0   | 0         | 0   | 0.43 | 0   | 0    | 0   | 0     | 0   |
| 0.00101  | 0   | 0.01138  | 0   | 0         | 0   | 0.43 | 0   | 0    | 0   | 0     | 0   |

| Incremental Heating |           |
|---------------------|-----------|
| 07C2335             | 500 °C    |
| 07C2336             | 600 °C ✓  |
| 07C2337             | 700 °C ✓  |
| 07C2339             | 800 °C ✓  |
| 07C2340             | 900 °C ✓  |
| 07C2341             | 975 °C ✓  |
| 07C2343             | 1050 °C ✓ |
| 07C2344             | 1125 °C ✓ |
| 07C2345             | 1200 °C ✓ |
| 07C2346             | 1275 °C ✓ |
| 07C2348             | 1350 °C ✓ |
| 07C2349             | 1400 °C ✓ |

Σ

#### Information on Analysis

JS07-1  
plagioclase  
Steens basalt  
jh

Project = HLP  
Irradiation = OSU1C07  
J = 0.0017230 ± 0.0000038  
FCT-3 = 28.030 ± 0.003 Ma

| 36Ar(a)  | 37Ar(ca) | 38Ar(cl) | 39Ar(k)  | 40Ar(r)  | Age $\pm 2\sigma$<br>(Ma) | 40Ar(r)<br>(%) | 39Ar(k)<br>(%) | K/Ca $\pm 2\sigma$ | Normal<br>Isochron |         |
|----------|----------|----------|----------|----------|---------------------------|----------------|----------------|--------------------|--------------------|---------|
| 0.000054 | 0.005864 | 0.000007 | 0.000726 | 0.000829 | 3.55 $\pm$ 14.10          | 4.96           | 0.45           | 0.053 $\pm$ 0.001  | 07C2335            | 500 °C  |
| 0.000115 | 0.092878 | 0.000006 | 0.005876 | 0.032426 | 17.07 $\pm$ 1.53          | 48.73          | 3.60           | 0.027 $\pm$ 0.000  | 07C2336            | 600 °C  |
| 0.000060 | 0.189934 | 0.000000 | 0.008424 | 0.043973 | 16.15 $\pm$ 1.21          | 71.38          | 5.17           | 0.019 $\pm$ 0.000  | 07C2337            | 700 °C  |
| 0.000083 | 0.421897 | 0.000000 | 0.016069 | 0.088008 | 16.94 $\pm$ 0.77          | 78.24          | 9.85           | 0.016 $\pm$ 0.000  | 07C2339            | 800 °C  |
| 0.000070 | 0.514495 | 0.000000 | 0.018392 | 0.101514 | 17.08 $\pm$ 0.79          | 83.14          | 11.28          | 0.015 $\pm$ 0.000  | 07C2340            | 900 °C  |
| 0.000113 | 0.469502 | 0.000000 | 0.016559 | 0.087683 | 16.39 $\pm$ 0.64          | 72.34          | 10.15          | 0.015 $\pm$ 0.000  | 07C2341            | 975 °C  |
| 0.000074 | 0.691021 | 0.000000 | 0.024282 | 0.129506 | 16.50 $\pm$ 0.43          | 85.55          | 14.89          | 0.015 $\pm$ 0.000  | 07C2343            | 1050 °C |
| 0.000075 | 0.559463 | 0.000000 | 0.019438 | 0.104276 | 16.60 $\pm$ 0.49          | 82.47          | 11.92          | 0.015 $\pm$ 0.000  | 07C2344            | 1125 °C |
| 0.000092 | 0.473174 | 0.000000 | 0.016349 | 0.087199 | 16.50 $\pm$ 1.01          | 76.22          | 10.03          | 0.015 $\pm$ 0.000  | 07C2345            | 1200 °C |
| 0.000097 | 0.493767 | 0.000000 | 0.017038 | 0.093738 | 17.02 $\pm$ 0.63          | 76.65          | 10.45          | 0.015 $\pm$ 0.000  | 07C2346            | 1275 °C |
| 0.000068 | 0.371523 | 0.000000 | 0.012829 | 0.071199 | 17.17 $\pm$ 0.65          | 77.94          | 7.87           | 0.015 $\pm$ 0.000  | 07C2348            | 1350 °C |
| 0.000206 | 0.206910 | 0.000000 | 0.007089 | 0.039835 | 17.38 $\pm$ 2.03          | 39.55          | 4.35           | 0.015 $\pm$ 0.000  | 07C2349            | 1400 °C |
| 0.001106 | 4.490428 | 0.000013 | 0.163071 | 0.880184 |                           |                |                |                    |                    |         |

| Results          | 40(r)/39(k) $\pm 2\sigma$          | Age $\pm 2\sigma$<br>(Ma)       | MSWD   | 39Ar(k)<br>(%,n)    | K/Ca $\pm 2\sigma$ | Results    |
|------------------|------------------------------------|---------------------------------|--------|---------------------|--------------------|------------|
| Weighted Plateau | 5.4037 $\pm$ 0.0685<br>$\pm$ 1.27% | 16.72 $\pm$ 0.22<br>$\pm$ 1.34% | 0.81   | 99.55<br>11         | 0.016 $\pm$ 0.001  | Isochron   |
|                  |                                    | External Error $\pm$ 0.35       | 2.23   | Statistical T Ratio |                    |            |
|                  |                                    | Analytical Error $\pm$ 0.21     | 1.0000 | Error Magnification |                    |            |
| Total Fusion Age | 5.3976 $\pm$ 0.0803<br>$\pm$ 1.49% | 16.70 $\pm$ 0.26<br>$\pm$ 1.54% |        | 12                  | 0.016 $\pm$ 0.000  | Statistics |
|                  |                                    | External Error $\pm$ 0.37       |        |                     |                    |            |
|                  |                                    | Analytical Error $\pm$ 0.25     |        |                     |                    |            |

|   | 39(k)/36(a) $\pm 2\sigma$ | 40(a+r)/36(a) $\pm 2\sigma$ | r.i.   | Inverse Isochron |         | 39(k)/40(a+r) $\pm 2\sigma$ |
|---|---------------------------|-----------------------------|--------|------------------|---------|-----------------------------|
|   | 13.5 $\pm$ 2.8            | 310.9 $\pm$ 64.6            | 0.9956 | 07C2335          | 500 °C  | 0.043446 $\pm$ 0.000849     |
| ✓ | 50.9 $\pm$ 4.2            | 576.4 $\pm$ 47.5            | 0.9833 | 07C2336          | 600 °C  | 0.088311 $\pm$ 0.001325     |
| ✓ | 141.2 $\pm$ 25.5          | 1032.7 $\pm$ 186.9          | 0.9966 | 07C2337          | 700 °C  | 0.136751 $\pm$ 0.002030     |
| ✓ | 194.1 $\pm$ 31.0          | 1358.4 $\pm$ 217.3          | 0.9985 | 07C2339          | 800 °C  | 0.142872 $\pm$ 0.001269     |
| ✓ | 264.1 $\pm$ 59.0          | 1753.5 $\pm$ 391.5          | 0.9993 | 07C2340          | 900 °C  | 0.150641 $\pm$ 0.001213     |
| ✓ | 146.0 $\pm$ 14.0          | 1068.6 $\pm$ 102.4          | 0.9934 | 07C2341          | 975 °C  | 0.136627 $\pm$ 0.001505     |
| ✓ | 328.3 $\pm$ 47.0          | 2046.3 $\pm$ 293.3          | 0.9978 | 07C2343          | 1050 °C | 0.160424 $\pm$ 0.001513     |
| ✓ | 259.4 $\pm$ 33.7          | 1687.2 $\pm$ 219.6          | 0.9974 | 07C2344          | 1125 °C | 0.153765 $\pm$ 0.001437     |
| ✓ | 177.7 $\pm$ 34.4          | 1243.4 $\pm$ 240.9          | 0.9987 | 07C2345          | 1200 °C | 0.142933 $\pm$ 0.001396     |
| ✓ | 176.4 $\pm$ 20.5          | 1266.1 $\pm$ 147.5          | 0.9963 | 07C2346          | 1275 °C | 0.139337 $\pm$ 0.001389     |
| ✓ | 188.2 $\pm$ 23.3          | 1340.0 $\pm$ 166.6          | 0.9956 | 07C2348          | 1350 °C | 0.140448 $\pm$ 0.001646     |
| ✓ | 34.4 $\pm$ 2.6            | 488.9 $\pm$ 36.8            | 0.9859 | 07C2349          | 1400 °C | 0.070396 $\pm$ 0.000888     |

| 40(a)/36(a) $\pm 2\sigma$                       | 40(r)/39(k) $\pm 2\sigma$          | Age $\pm 2\sigma$<br>(Ma)                                                                   | MSWD                                   | Results    | 40(a)/36(a) $\pm 2\sigma$                       |
|-------------------------------------------------|------------------------------------|---------------------------------------------------------------------------------------------|----------------------------------------|------------|-------------------------------------------------|
| 305.3027 $\pm$ 20.1439<br>$\pm$ 6.60%           | 5.3388 $\pm$ 0.1262<br>$\pm$ 2.36% | 16.52 $\pm$ 0.40<br>$\pm$ 2.39%<br>External Error $\pm$ 0.47<br>Analytical Error $\pm$ 0.39 | 0.75                                   | Isochron   | 305.5642 $\pm$ 20.3279<br>$\pm$ 6.65%           |
| Statistical F Ratio<br>Error Magnification<br>n | 1.88<br>1.0000<br>11               | Convergence<br>Number of Iterations<br>Calculated Line                                      | 0.0000000518<br>176<br>Weighted York-2 | Statistics | Statistical F Ratio<br>Error Magnification<br>n |
|                                                 |                                    |                                                                                             |                                        |            | 1.88<br>1.0000<br>11                            |

| $36(a)/40(a+r) \pm 2\sigma$ | r.i.   | Degassing<br>Patterns |           | 36Ar(a)  | 36Ar(c)  | 36Ar(ca) | 36Ar(cl) |
|-----------------------------|--------|-----------------------|-----------|----------|----------|----------|----------|
| 0.003216 $\pm$ 0.000668     | 0.0124 | 07C2335               | 500 °C    | 0.000054 | 0.000000 | 0.000002 | 0.000000 |
| 0.001735 $\pm$ 0.000143     | 0.1434 | 07C2336               | 600 °C ✓  | 0.000115 | 0.000000 | 0.000025 | 0.000000 |
| 0.000968 $\pm$ 0.000175     | 0.0732 | 07C2337               | 700 °C ✓  | 0.000060 | 0.000000 | 0.000050 | 0.000000 |
| 0.000736 $\pm$ 0.000118     | 0.0412 | 07C2339               | 800 °C ✓  | 0.000083 | 0.000000 | 0.000111 | 0.000000 |
| 0.000570 $\pm$ 0.000127     | 0.0286 | 07C2340               | 900 °C ✓  | 0.000070 | 0.000000 | 0.000136 | 0.000000 |
| 0.000936 $\pm$ 0.000090     | 0.0743 | 07C2341               | 975 °C ✓  | 0.000113 | 0.000000 | 0.000124 | 0.000000 |
| 0.000489 $\pm$ 0.000070     | 0.0397 | 07C2343               | 1050 °C ✓ | 0.000074 | 0.000000 | 0.000182 | 0.000000 |
| 0.000593 $\pm$ 0.000077     | 0.0528 | 07C2344               | 1125 °C ✓ | 0.000075 | 0.000000 | 0.000148 | 0.000000 |
| 0.000804 $\pm$ 0.000156     | 0.0351 | 07C2345               | 1200 °C ✓ | 0.000092 | 0.000000 | 0.000125 | 0.000000 |
| 0.000790 $\pm$ 0.000092     | 0.0624 | 07C2346               | 1275 °C ✓ | 0.000097 | 0.000000 | 0.000130 | 0.000000 |
| 0.000746 $\pm$ 0.000093     | 0.0821 | 07C2348               | 1350 °C ✓ | 0.000068 | 0.000000 | 0.000098 | 0.000000 |
| 0.002045 $\pm$ 0.000154     | 0.1046 | 07C2349               | 1400 °C ✓ | 0.000206 | 0.000000 | 0.000055 | 0.000000 |
|                             |        | $\Sigma$              |           | 0.001106 | 0.000000 | 0.001185 | 0.000000 |
|                             |        | $\Sigma$              |           | 0.002292 |          |          |          |

| $40(r)/39(k) \pm 2\sigma$          | Age $\pm 2\sigma$<br>(Ma)       | MSWD |
|------------------------------------|---------------------------------|------|
| 5.3518 $\pm$ 0.1262<br>$\pm$ 2.36% | 16.56 $\pm$ 0.40<br>$\pm$ 2.39% | 0.78 |
| External Error $\pm$ 0.47          |                                 |      |
| Analytical Error $\pm$ 0.39        |                                 |      |
| Convergence                        | 0.0000000109                    |      |
| Number of Iterations               | 5                               |      |
| Calculated Line                    | Weighted York-2                 |      |

| 37Ar(ca) | 38Ar(a)  | 38Ar(c)  | 38Ar(k)  | 38Ar(ca) | 38Ar(cl) | 39Ar(k)  | 39Ar(ca) | 40Ar(r)  | 40Ar(a)  | 40Ar(c)  |
|----------|----------|----------|----------|----------|----------|----------|----------|----------|----------|----------|
| 0.005864 | 0.000010 | 0.000000 | 0.000008 | 0.000001 | 0.000007 | 0.000726 | 0.000004 | 0.000829 | 0.015893 | 0.000000 |
| 0.092878 | 0.000022 | 0.000000 | 0.000067 | 0.000013 | 0.000006 | 0.005876 | 0.000063 | 0.032426 | 0.034109 | 0.000000 |
| 0.189934 | 0.000011 | 0.000000 | 0.000096 | 0.000026 | 0.000000 | 0.008424 | 0.000128 | 0.043973 | 0.017626 | 0.000000 |
| 0.421897 | 0.000015 | 0.000000 | 0.000183 | 0.000059 | 0.000000 | 0.016069 | 0.000284 | 0.088008 | 0.024466 | 0.000000 |
| 0.514495 | 0.000013 | 0.000000 | 0.000209 | 0.000072 | 0.000000 | 0.018392 | 0.000346 | 0.101514 | 0.020575 | 0.000000 |
| 0.469502 | 0.000021 | 0.000000 | 0.000188 | 0.000065 | 0.000000 | 0.016559 | 0.000316 | 0.087683 | 0.033513 | 0.000000 |
| 0.691021 | 0.000014 | 0.000000 | 0.000276 | 0.000096 | 0.000000 | 0.024282 | 0.000465 | 0.129506 | 0.021858 | 0.000000 |
| 0.559463 | 0.000014 | 0.000000 | 0.000221 | 0.000078 | 0.000000 | 0.019438 | 0.000377 | 0.104276 | 0.022141 | 0.000000 |
| 0.473174 | 0.000017 | 0.000000 | 0.000186 | 0.000066 | 0.000000 | 0.016349 | 0.000318 | 0.087199 | 0.027185 | 0.000000 |
| 0.493767 | 0.000018 | 0.000000 | 0.000194 | 0.000069 | 0.000000 | 0.017038 | 0.000332 | 0.093738 | 0.028540 | 0.000000 |
| 0.371523 | 0.000013 | 0.000000 | 0.000146 | 0.000052 | 0.000000 | 0.012829 | 0.000250 | 0.071199 | 0.020143 | 0.000000 |
| 0.206910 | 0.000038 | 0.000000 | 0.000081 | 0.000029 | 0.000000 | 0.007089 | 0.000139 | 0.039835 | 0.060867 | 0.000000 |
| 4.490428 | 0.000207 | 0.000000 | 0.001856 | 0.000624 | 0.000013 | 0.163071 | 0.003022 | 0.880184 | 0.326914 | 0.000000 |
| 4.490428 |          |          |          |          | 0.002699 |          | 0.166093 |          |          |          |

| 40Ar(k)  | Additional Parameters |           | 40(r)/39(k) | 1σ      | 40(r+a) | 1σ      | 40Ar/39Ar | 1σ      | 37Ar/39Ar | 1σ      |
|----------|-----------------------|-----------|-------------|---------|---------|---------|-----------|---------|-----------|---------|
| 0.000001 | 07C2335               | 500 °C    | 1.141594    | 2.27290 | 0.01672 | 0.00006 | 22.89389  | 0.22255 | 8.02732   | 0.10322 |
| 0.000006 | 07C2336               | 600 °C ✓  | 5.518582    | 0.24867 | 0.06653 | 0.00044 | 11.20537  | 0.08385 | 15.64046  | 0.13868 |
| 0.000009 | 07C2337               | 700 °C ✓  | 5.220157    | 0.19606 | 0.06160 | 0.00043 | 7.20424   | 0.05336 | 22.21061  | 0.17777 |
| 0.000016 | 07C2339               | 800 °C ✓  | 5.476730    | 0.12517 | 0.11247 | 0.00043 | 6.87874   | 0.03039 | 25.79883  | 0.23467 |
| 0.000019 | 07C2340               | 900 °C ✓  | 5.519586    | 0.12748 | 0.12209 | 0.00044 | 6.51661   | 0.02612 | 27.45754  | 0.20303 |
| 0.000017 | 07C2341               | 975 °C ✓  | 5.295309    | 0.10329 | 0.12120 | 0.00054 | 7.18315   | 0.03929 | 27.82309  | 0.22398 |
| 0.000025 | 07C2343               | 1050 °C ✓ | 5.333340    | 0.07016 | 0.15136 | 0.00055 | 6.11734   | 0.02862 | 27.92305  | 0.22533 |
| 0.000020 | 07C2344               | 1125 °C ✓ | 5.364413    | 0.07949 | 0.12642 | 0.00051 | 6.38084   | 0.02964 | 28.23447  | 0.25943 |
| 0.000017 | 07C2345               | 1200 °C ✓ | 5.333527    | 0.16409 | 0.11438 | 0.00047 | 6.86362   | 0.03329 | 28.38885  | 0.23620 |
| 0.000017 | 07C2346               | 1275 °C ✓ | 5.501745    | 0.10300 | 0.12228 | 0.00052 | 7.04053   | 0.03489 | 28.42610  | 0.24407 |
| 0.000013 | 07C2348               | 1350 °C ✓ | 5.549972    | 0.10539 | 0.09134 | 0.00050 | 6.98497   | 0.04081 | 28.40679  | 0.22675 |
| 0.000007 | 07C2349               | 1400 °C ✓ | 5.619228    | 0.32890 | 0.10070 | 0.00050 | 13.93262  | 0.08719 | 28.62501  | 0.24756 |
| 0.000165 |                       |           |             |         |         |         |           |         |           |         |
| 1.207263 |                       |           |             |         |         |         |           |         |           |         |



| 36Ar/39Ar | 1 $\sigma$ | 37Ar<br>(decay) | 39Ar<br>(decay) | 40Ar<br>(moles) |
|-----------|------------|-----------------|-----------------|-----------------|
| 0.07575   | 0.00768    | 1.70023317      | 1.00018962      | 1.692E-21       |
| 0.02357   | 0.00079    | 1.70079298      | 1.00018974      | 6.734E-21       |
| 0.01284   | 0.00063    | 1.70137631      | 1.00018986      | 6.235E-21       |
| 0.01187   | 0.00040    | 1.70254357      | 1.00019011      | 1.138E-20       |
| 0.01096   | 0.00041    | 1.70312750      | 1.00019023      | 1.236E-20       |
| 0.01407   | 0.00032    | 1.70373500      | 1.00019036      | 1.227E-20       |
| 0.01036   | 0.00021    | 1.70490388      | 1.00019060      | 1.532E-20       |
| 0.01124   | 0.00024    | 1.70548862      | 1.00019073      | 1.280E-20       |
| 0.01301   | 0.00053    | 1.70607356      | 1.00019085      | 1.158E-20       |
| 0.01306   | 0.00032    | 1.70665870      | 1.00019097      | 1.238E-20       |
| 0.01271   | 0.00032    | 1.70785301      | 1.00019122      | 9.245E-21       |
| 0.03605   | 0.00107    | 1.70843877      | 1.00019134      | 1.019E-20       |

07C2335.AGE >>> JS07-1 >>> HLP PROJECT

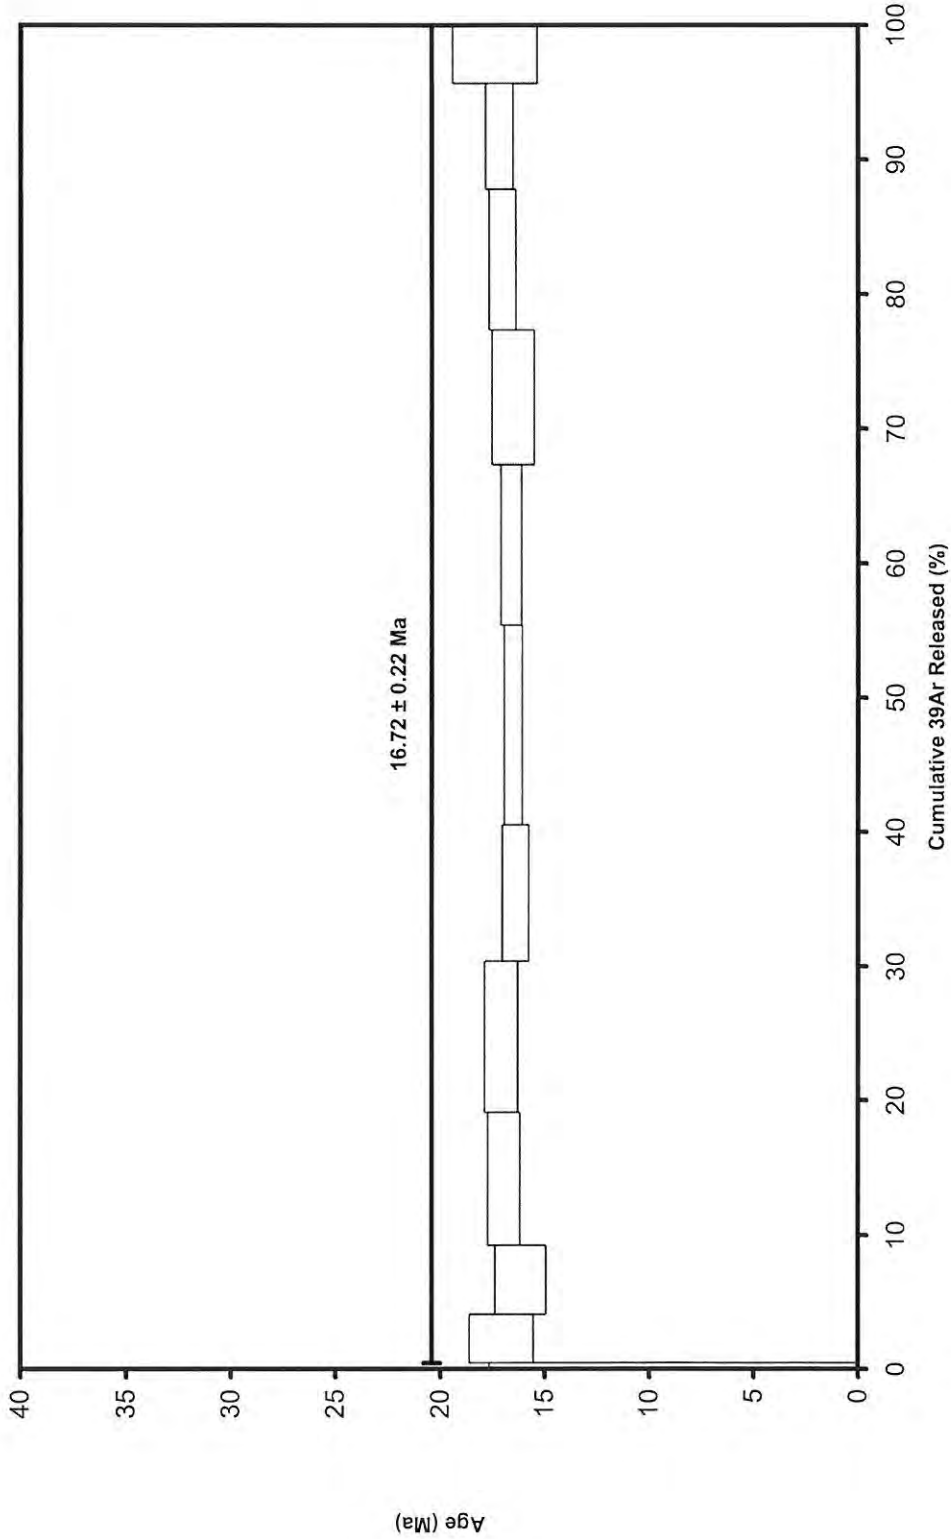

**Ar-Ages in Ma**

WEIGHTED PLATEAU  
 $16.72 \pm 0.22$

TOTAL FUSION  
 $16.70 \pm 0.26$

NORMAL ISOCHRON  
 $16.52 \pm 0.40$

INVERSE ISOCHRON  
 $16.56 \pm 0.40$

MSWD  
0.81

**Sample Info**

plagioclase  
Steens basalt  
jh

IRR = OSU1C07  
J =  $0.0017230 \pm$

DR2013250 Camp

07C2335.AGE >>> JS07-1 >>> HLP PROJECT

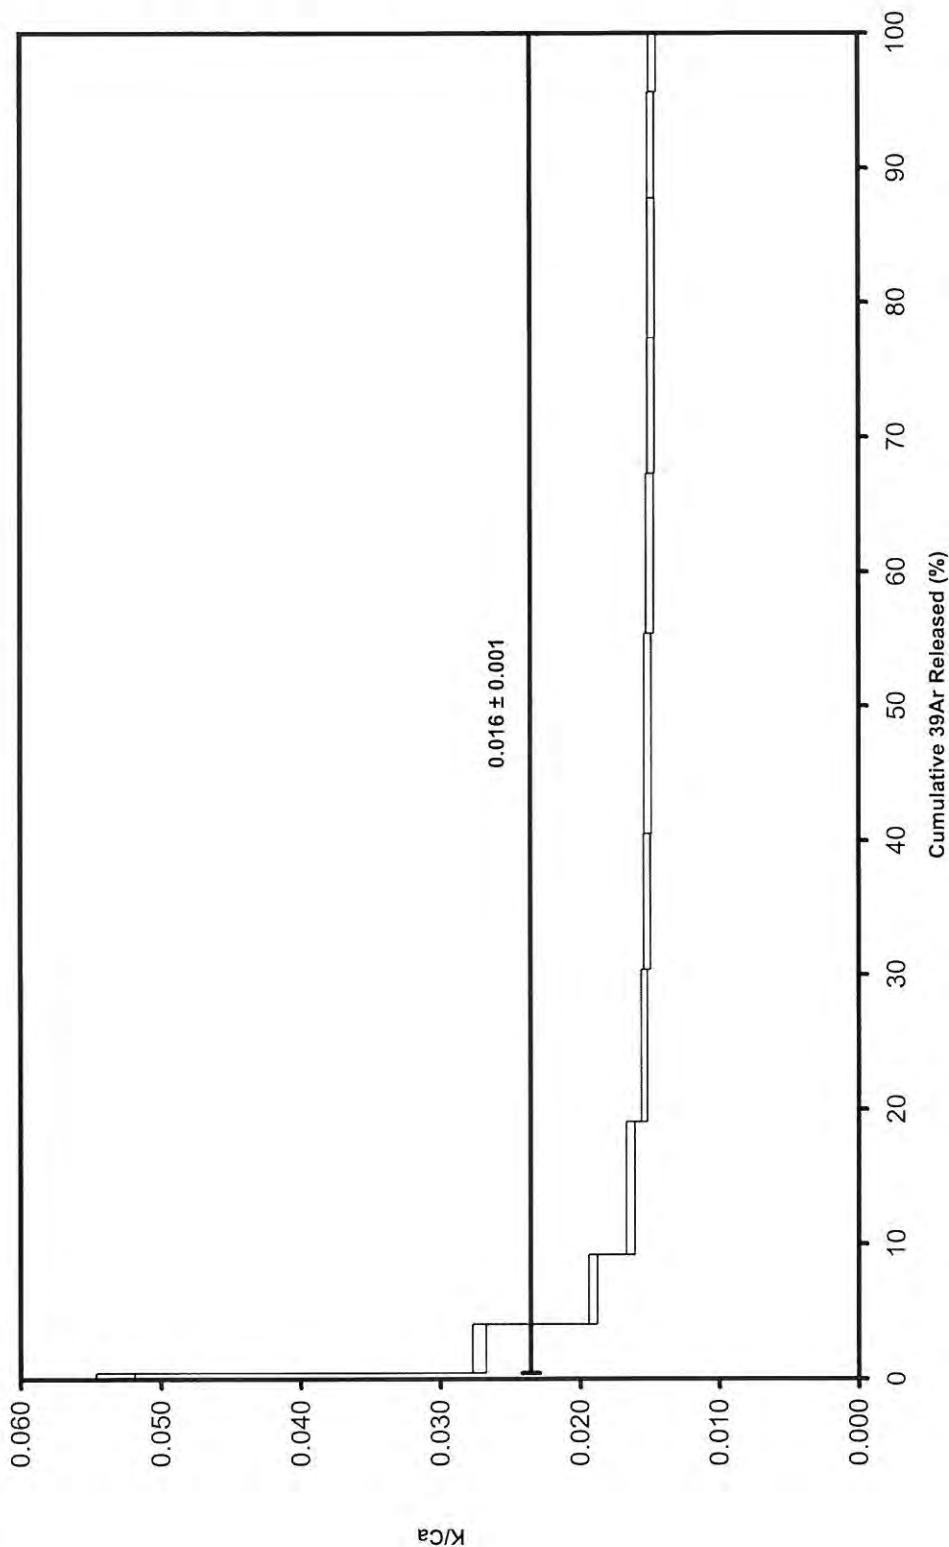

**Ar-Ages in Ma**

WEIGHTED PLATEAU  
16.72 ± 0.22

TOTAL FUSION  
16.70 ± 0.26

NORMAL ISOCHRON  
16.52 ± 0.40

INVERSE ISOCHRON  
16.56 ± 0.40

**Sample Info**

plagioclase  
Steens basalt  
jh

IRR = OSU1C07  
J = 0.0017230 ±

DR2013250 Camp

07C2335.AGE >>> JS07-1 >>> HLP PROJECT

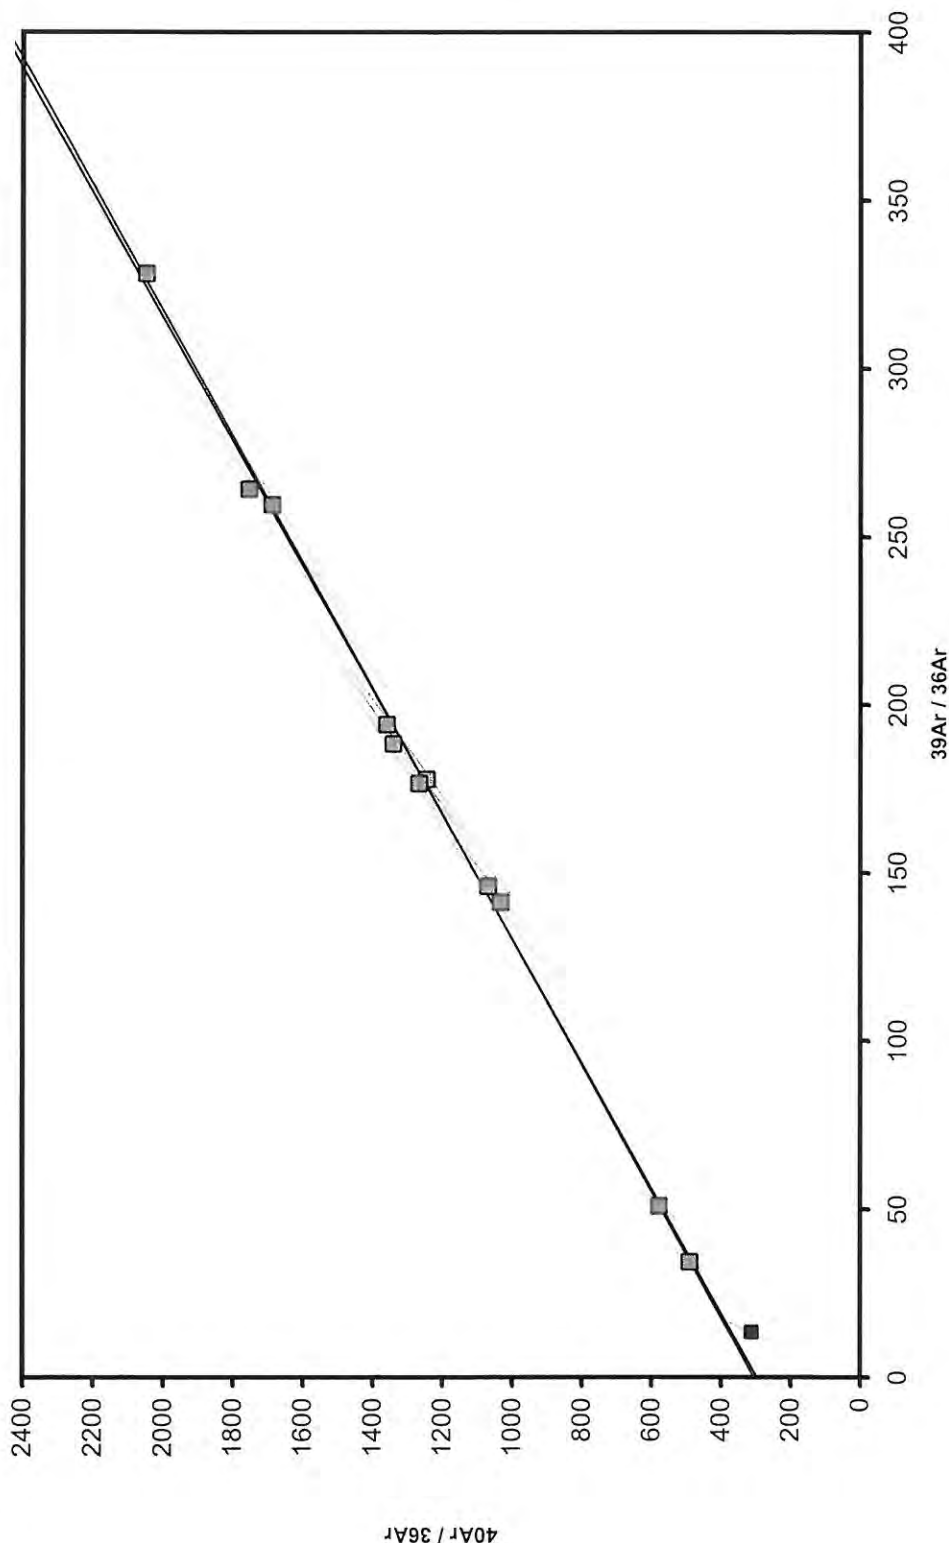

Ar-Ages in Ma

WEIGHTED PLATEAU  
16.72  $\pm$  0.22

TOTAL FUSION  
16.70  $\pm$  0.26

NORMAL ISOCHRON  
16.52  $\pm$  0.40

INVERSE ISOCHRON  
16.56  $\pm$  0.40

MSWD  
0.75

Sample Info

plagioclase

Steens basalt

jh

IRR = OSU1C07

J = 0.0017230  $\pm$

DR2013250 Camp

07C2335.AGE >>> JS07-1 >>> HLP PROJECT

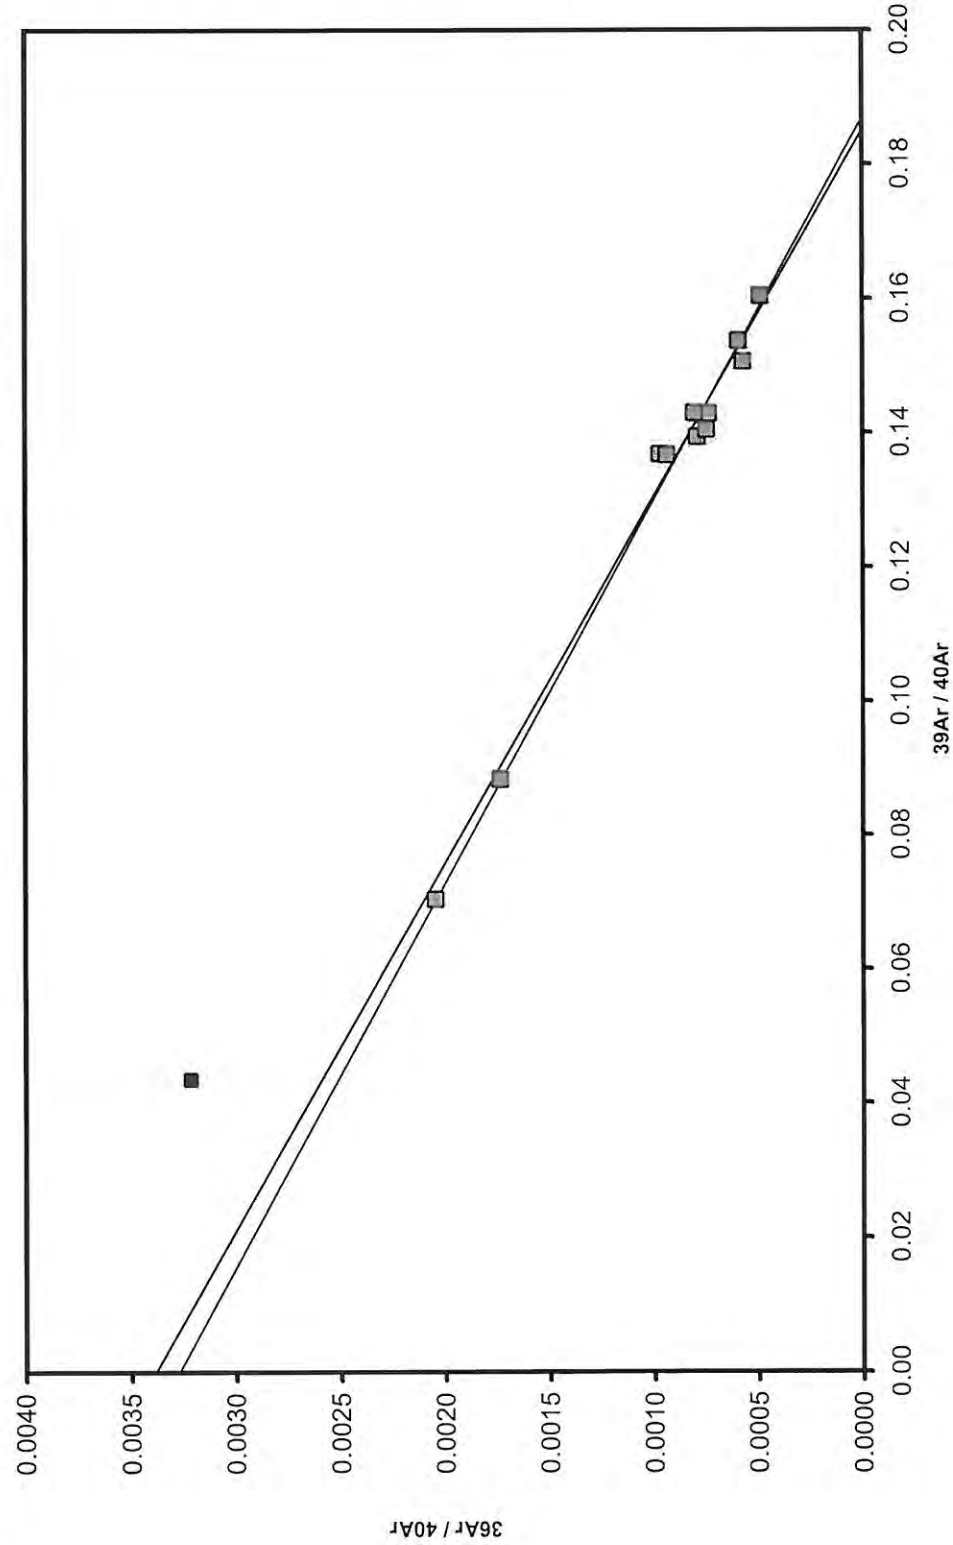

Ar-Ages in Ma

WEIGHTED PLATEAU  
16.72  $\pm$  0.22

TOTAL FUSION  
16.70  $\pm$  0.26

NORMAL ISOCHRON  
16.52  $\pm$  0.40

INVERSE ISOCHRON  
16.56  $\pm$  0.40

MSWD  
0.78

Sample Info

plagioclase

Steens basalt

jh

IRR = OSU1C07

J = 0.0017230  $\pm$

DR2013250 Camp

Age Data - Sample JS-5

| Procedure |         | 36Ar     | 1 $\sigma$ | 37Ar     | 1 $\sigma$ | 38Ar     | 1 $\sigma$ | 39Ar     | 1 $\sigma$ | 40Ar     | 1 $\sigma$ |
|-----------|---------|----------|------------|----------|------------|----------|------------|----------|------------|----------|------------|
| Blanks    |         |          |            |          |            |          |            |          |            |          |            |
| 07C1436   | 600 °C  | 0.000022 | 0.000004   | 0.000033 | 0.000005   | 0.000019 | 0.000003   | 0.000011 | 0.000006   | 0.003890 | 0.000019   |
| 07C1437   | 700 °C  | 0.000022 | 0.000004   | 0.000033 | 0.000005   | 0.000019 | 0.000003   | 0.000011 | 0.000006   | 0.003890 | 0.000019   |
| 07C1438   | 800 °C  | 0.000020 | 0.000005   | 0.000039 | 0.000008   | 0.000022 | 0.000003   | 0.000046 | 0.000007   | 0.003701 | 0.000030   |
| 07C1440   | 900 °C  | 0.000020 | 0.000005   | 0.000039 | 0.000008   | 0.000022 | 0.000003   | 0.000046 | 0.000007   | 0.003701 | 0.000030   |
| 07C1441   | 1000 °C | 0.000020 | 0.000005   | 0.000039 | 0.000008   | 0.000022 | 0.000003   | 0.000046 | 0.000007   | 0.003701 | 0.000030   |
| 07C1442   | 1100 °C | 0.000020 | 0.000005   | 0.000039 | 0.000008   | 0.000022 | 0.000003   | 0.000046 | 0.000007   | 0.003701 | 0.000030   |
| 07C1443   | 1250 °C | 0.000020 | 0.000005   | 0.000039 | 0.000008   | 0.000022 | 0.000003   | 0.000046 | 0.000007   | 0.003701 | 0.000030   |
| 07C1445   | 1400 °C | 0.000022 | 0.000003   | 0.000145 | 0.000002   | 0.000017 | 0.000003   | 0.000053 | 0.000005   | 0.003514 | 0.000027   |

These calculations are all relative to the FCT-3 biotite monitor age at 28.0 Ma, and have not yet been recalculated to the new 28.201 Ma mor

| Intercept<br>Values |         | 36Ar     | 1 $\sigma$ | r2     |                | 37Ar     | 1 $\sigma$ | r2     |               |
|---------------------|---------|----------|------------|--------|----------------|----------|------------|--------|---------------|
| 07C1436             | 600 °C  | 0.000053 | 0.000007   | 0.1300 | LIN #          | 0.010404 | 0.000016   | 0.9955 | LIN # 4 6     |
| 07C1437             | 700 °C  | 0.000155 | 0.000003   | 0.0723 | LIN # 7 10     | 0.037096 | 0.000086   | 0.9769 | LIN #         |
| 07C1438             | 800 °C  | 0.000209 | 0.000008   | 0.0137 | LIN #          | 0.053514 | 0.000072   | 0.9906 | LIN # 1 9     |
| 07C1440             | 900 °C  | 0.000190 | 0.000003   | 0.6354 | LIN # 1 3 4 10 | 0.043233 | 0.000076   | 0.9839 | LIN #         |
| 07C1441             | 1000 °C | 0.000140 | 0.000003   | 0.0106 | LIN # 2 5 6    | 0.037470 | 0.000102   | 0.9681 | LIN #         |
| 07C1442             | 1100 °C | 0.000121 | 0.000006   | 0.0605 | LIN # 1 4      | 0.033359 | 0.000096   | 0.9773 | LIN # 4 6     |
| 07C1443             | 1250 °C | 0.000202 | 0.000004   | 0.5369 | LIN # 1 5 8    | 0.065196 | 0.000163   | 0.9823 | LIN # 1 2 4 8 |
| 07C1445             | 1400 °C | 0.000134 | 0.000008   | 0.0025 | LIN # 1 2 7    | 0.038885 | 0.000046   | 0.9920 | LIN #         |

nitor age of Kuiper et al.(2008).

| 38Ar     | 1 $\sigma$ | r2     |              | 39Ar     | 1 $\sigma$ | r2     |                |
|----------|------------|--------|--------------|----------|------------|--------|----------------|
| 0.000043 | 0.000007   | 0.3132 | LIN # 3      | 0.002864 | 0.000007   | 0.9163 | LIN # 3 5 6    |
| 0.000127 | 0.000009   | 0.3159 | LIN #        | 0.009796 | 0.000029   | 0.3275 | LIN # 1 6 7 10 |
| 0.000178 | 0.000008   | 0.3968 | LIN # 5 7    | 0.013440 | 0.000026   | 0.9551 | LIN # 1        |
| 0.000148 | 0.000007   | 0.1463 | LIN # 1 6 10 | 0.010129 | 0.000037   | 0.5888 | LIN # 1        |
| 0.000119 | 0.000009   | 0.0055 | LIN #        | 0.008514 | 0.000020   | 0.3148 | LIN # 1 5 7 9  |
| 0.000102 | 0.000006   | 0.4414 | LIN # 5 10   | 0.007363 | 0.000026   | 0.4069 | LIN # 1        |
| 0.000193 | 0.000007   | 0.0403 | LIN # 5      | 0.014341 | 0.000044   | 0.9151 | LIN # 1 2 3 9  |
| 0.000139 | 0.000007   | 0.4905 | LIN # 2      | 0.008315 | 0.000039   | 0.1592 | LIN #          |



| 40Ar     | 1σ       | r2     |                 | Sample<br>Parameters | Sample  | Material |             |
|----------|----------|--------|-----------------|----------------------|---------|----------|-------------|
| 0.025703 | 0.000049 | 0.9908 | LIN #           | 07C1436              | 600 °C  | JS5      | plagioclase |
| 0.078217 | 0.000061 | 0.9507 | LIN # 1 6       | 07C1437              | 700 °C  | JS5      | plagioclase |
| 0.104074 | 0.000130 | 0.3628 | LIN # 1         | 07C1438              | 800 °C  | JS5      | plagioclase |
| 0.087911 | 0.000052 | 0.8948 | LIN # 1 9 10    | 07C1440              | 900 °C  | JS5      | plagioclase |
| 0.066030 | 0.000044 | 0.9938 | LIN # 1 2 3 7 9 | 07C1441              | 1000 °C | JS5      | plagioclase |
| 0.055488 | 0.000108 | 0.9570 | LIN # 1         | 07C1442              | 1100 °C | JS5      | plagioclase |
| 0.100580 | 0.000248 | 0.5910 | LIN # 1 2       | 07C1443              | 1250 °C | JS5      | plagioclase |
| 0.062132 | 0.000065 | 0.9821 | LIN # 1         | 07C1445              | 1400 °C | JS5      | plagioclase |

| Location | Analyst | Temp | Standard<br>(in Ma) | %1 $\sigma$ | J         | %1 $\sigma$ |
|----------|---------|------|---------------------|-------------|-----------|-------------|
| Steens   | jh      | 600  | 28.03               | 0.01        | 0.0014849 | 0.39        |
| Steens   | jh      | 700  | 28.03               | 0.01        | 0.0014849 | 0.39        |
| Steens   | jh      | 800  | 28.03               | 0.01        | 0.0014849 | 0.39        |
| Steens   | jh      | 900  | 28.03               | 0.01        | 0.0014849 | 0.39        |
| Steens   | jh      | 1000 | 28.03               | 0.01        | 0.0014849 | 0.39        |
| Steens   | jh      | 1100 | 28.03               | 0.01        | 0.0014849 | 0.39        |
| Steens   | jh      | 1250 | 28.03               | 0.01        | 0.0014849 | 0.39        |
| Steens   | jh      | 1400 | 28.03               | 0.01        | 0.0014849 | 0.39        |

| MDF     | %1 $\sigma$ | Volume Ratio | Sensitivity (mol/vol) | Day | Month | Year | Hour | Min | Resist | Irradiation | Project | Standard Name | Irradiation Constants |
|---------|-------------|--------------|-----------------------|-----|-------|------|------|-----|--------|-------------|---------|---------------|-----------------------|
| 1.00378 | 0.16        | 1.0157       | 1.012E-19             | 08  | 04    | 2007 | 17   | 31  | 001    | OSU4E06     | HLP     | FCT-3         | 07C1436               |
| 1.00378 | 0.16        | 1.0158       | 1.012E-19             | 08  | 04    | 2007 | 17   | 51  | 001    | OSU4E06     | HLP     | FCT-3         | 07C1437               |
| 1.00378 | 0.16        | 1.0158       | 1.012E-19             | 08  | 04    | 2007 | 18   | 12  | 001    | OSU4E06     | HLP     | FCT-3         | 07C1438               |
| 1.00378 | 0.16        | 1.0158       | 1.012E-19             | 08  | 04    | 2007 | 19   | 01  | 001    | OSU4E06     | HLP     | FCT-3         | 07C1440               |
| 1.00378 | 0.16        | 1.0158       | 1.012E-19             | 08  | 04    | 2007 | 19   | 22  | 001    | OSU4E06     | HLP     | FCT-3         | 07C1441               |
| 1.00378 | 0.16        | 1.0157       | 1.012E-19             | 08  | 04    | 2007 | 19   | 42  | 001    | OSU4E06     | HLP     | FCT-3         | 07C1442               |
| 1.00378 | 0.16        | 1.0157       | 1.012E-19             | 08  | 04    | 2007 | 20   | 03  | 001    | OSU4E06     | HLP     | FCT-3         | 07C1443               |
| 1.00378 | 0.16        | 1.0156       | 1.012E-19             | 08  | 04    | 2007 | 20   | 44  | 001    | OSU4E06     | HLP     | FCT-3         | 07C1445               |

|         | 40/36(a) | %1σ | 40/36(c) | %1σ | 38/36(a) | %1σ | 38/36(c) | %1σ | 39/37(ca) | %1σ | 38/37(ca) | %1σ | 36/37(ca) | %1σ |
|---------|----------|-----|----------|-----|----------|-----|----------|-----|-----------|-----|-----------|-----|-----------|-----|
| 600 °C  | 295.5    | 0   | 0.018    | 35  | 0.1869   | 0   | 1.493    | 3   | 0.000673  | 0   | 0.000139  | 0   | 0.000264  | 0   |
| 700 °C  | 295.5    | 0   | 0.018    | 35  | 0.1869   | 0   | 1.493    | 3   | 0.000673  | 0   | 0.000139  | 0   | 0.000264  | 0   |
| 800 °C  | 295.5    | 0   | 0.018    | 35  | 0.1869   | 0   | 1.493    | 3   | 0.000673  | 0   | 0.000139  | 0   | 0.000264  | 0   |
| 900 °C  | 295.5    | 0   | 0.018    | 35  | 0.1869   | 0   | 1.493    | 3   | 0.000673  | 0   | 0.000139  | 0   | 0.000264  | 0   |
| 1000 °C | 295.5    | 0   | 0.018    | 35  | 0.1869   | 0   | 1.493    | 3   | 0.000673  | 0   | 0.000139  | 0   | 0.000264  | 0   |
| 1100 °C | 295.5    | 0   | 0.018    | 35  | 0.1869   | 0   | 1.493    | 3   | 0.000673  | 0   | 0.000139  | 0   | 0.000264  | 0   |
| 1250 °C | 295.5    | 0   | 0.018    | 35  | 0.1869   | 0   | 1.493    | 3   | 0.000673  | 0   | 0.000139  | 0   | 0.000264  | 0   |
| 1400 °C | 295.5    | 0   | 0.018    | 35  | 0.1869   | 0   | 1.493    | 3   | 0.000673  | 0   | 0.000139  | 0   | 0.000264  | 0   |

| 40/39(k) | %1σ | 38/39(k) | %1σ | 36/38(cl) | %1σ | K/Ca | %1σ | K/Cl | %1σ | Ca/Cl | %1σ |
|----------|-----|----------|-----|-----------|-----|------|-----|------|-----|-------|-----|
| 0.00101  | 0   | 0.01138  | 0   | 0         | 0   | 0.43 | 0   | 0    | 0   | 0     | 0   |
| 0.00101  | 0   | 0.01138  | 0   | 0         | 0   | 0.43 | 0   | 0    | 0   | 0     | 0   |
| 0.00101  | 0   | 0.01138  | 0   | 0         | 0   | 0.43 | 0   | 0    | 0   | 0     | 0   |
| 0.00101  | 0   | 0.01138  | 0   | 0         | 0   | 0.43 | 0   | 0    | 0   | 0     | 0   |
| 0.00101  | 0   | 0.01138  | 0   | 0         | 0   | 0.43 | 0   | 0    | 0   | 0     | 0   |
| 0.00101  | 0   | 0.01138  | 0   | 0         | 0   | 0.43 | 0   | 0    | 0   | 0     | 0   |
| 0.00101  | 0   | 0.01138  | 0   | 0         | 0   | 0.43 | 0   | 0    | 0   | 0     | 0   |
| 0.00101  | 0   | 0.01138  | 0   | 0         | 0   | 0.43 | 0   | 0    | 0   | 0     | 0   |

#### Incremental Heating

|         |         |   |
|---------|---------|---|
| 07C1436 | 600 °C  | ✓ |
| 07C1437 | 700 °C  | ✓ |
| 07C1438 | 800 °C  | ✓ |
| 07C1440 | 900 °C  | ✓ |
| 07C1441 | 1000 °C | ✓ |
| 07C1442 | 1100 °C | ✓ |
| 07C1443 | 1250 °C | ✓ |
| 07C1445 | 1400 °C | ✓ |

Σ

#### Information on Analysis

JS5  
plagioclase  
Steens  
jh

Project = HLP  
Irradiation = OSU4E06  
J = 0.0014849 ± 0.0000058  
FCT-3 = 28.030 ± 0.003 Ma

| 36Ar(a)  | 37Ar(ca) | 38Ar(cl) | 39Ar(k)  | 40Ar(r)  | Age $\pm 2\sigma$<br>(Ma) | 40Ar(r)<br>(%) | 39Ar(k)<br>(%) | K/Ca $\pm 2\sigma$ | Normal<br>Isochron |         |
|----------|----------|----------|----------|----------|---------------------------|----------------|----------------|--------------------|--------------------|---------|
| 0.000009 | 0.088267 | 0.000000 | 0.002830 | 0.019628 | 18.49 $\pm$ 4.66          | 88.35          | 3.85           | 0.014 $\pm$ 0.001  | 07C1436            | 600 °C  |
| 0.000050 | 0.315532 | 0.000000 | 0.009697 | 0.060773 | 16.71 $\pm$ 0.94          | 80.43          | 13.18          | 0.013 $\pm$ 0.001  | 07C1437            | 700 °C  |
| 0.000069 | 0.455369 | 0.000000 | 0.013259 | 0.081511 | 16.39 $\pm$ 1.16          | 79.90          | 18.02          | 0.013 $\pm$ 0.001  | 07C1438            | 800 °C  |
| 0.000073 | 0.368067 | 0.000000 | 0.009965 | 0.064009 | 17.13 $\pm$ 0.99          | 74.78          | 13.54          | 0.012 $\pm$ 0.001  | 07C1440            | 900 °C  |
| 0.000037 | 0.319051 | 0.000000 | 0.008362 | 0.052546 | 16.76 $\pm$ 1.14          | 82.92          | 11.36          | 0.011 $\pm$ 0.001  | 07C1441            | 1000 °C |
| 0.000027 | 0.284062 | 0.000000 | 0.007219 | 0.044761 | 16.53 $\pm$ 1.72          | 85.00          | 9.81           | 0.011 $\pm$ 0.000  | 07C1442            | 1100 °C |
| 0.000036 | 0.555646 | 0.000000 | 0.014102 | 0.087874 | 16.62 $\pm$ 0.79          | 89.25          | 19.17          | 0.011 $\pm$ 0.000  | 07C1443            | 1250 °C |
| 0.000026 | 0.330539 | 0.000000 | 0.008145 | 0.051985 | 17.02 $\pm$ 1.79          | 87.24          | 11.07          | 0.011 $\pm$ 0.000  | 07C1445            | 1400 °C |
| 0.000326 | 2.716533 | 0.000000 | 0.073578 | 0.463088 |                           |                |                |                    |                    |         |

| Results          | 40(r)/39(k) $\pm 2\sigma$          | Age $\pm 2\sigma$<br>(Ma)       | MSWD   | 39Ar(k)<br>(%,n)    | K/Ca $\pm 2\sigma$ | Results        |
|------------------|------------------------------------|---------------------------------|--------|---------------------|--------------------|----------------|
| Weighted Plateau | 6.2790 $\pm$ 0.1546<br>$\pm$ 2.46% | 16.74 $\pm$ 0.43<br>$\pm$ 2.57% | 0.25   | 100.00<br>8         | 0.012 $\pm$ 0.001  | No Convergence |
|                  |                                    | External Error $\pm$ 0.51       | 2.36   | Statistical T Ratio |                    |                |
|                  |                                    | Analytical Error $\pm$ 0.41     | 1.0000 | Error Magnification |                    |                |
| Total Fusion Age | 6.2938 $\pm$ 0.1756<br>$\pm$ 2.79% | 16.78 $\pm$ 0.48<br>$\pm$ 2.88% |        | 8                   | 0.000 $\pm$ 0.000  | Statistics     |
|                  |                                    | External Error $\pm$ 0.55       |        |                     |                    |                |
|                  |                                    | Analytical Error $\pm$ 0.47     |        |                     |                    |                |

| 39(k)/36(a) ± 2σ |               | 40(a+r)/36(a) ± 2σ | r.i.   | Inverse Isochron |         | 39(k)/40(a+r) ± 2σ |                     |
|------------------|---------------|--------------------|--------|------------------|---------|--------------------|---------------------|
| ✓                | 323.4 ± 621.7 | 2538.6 ± 4880.4    | 1.0000 | 07C1436          | 600 °C  | ✓                  | 0.127378 ± 0.001123 |
| ✓                | 193.9 ± 44.6  | 1510.6 ± 347.4     | 0.9995 | 07C1437          | 700 °C  | ✓                  | 0.128352 ± 0.000924 |
| ✓                | 191.2 ± 53.9  | 1470.9 ± 414.9     | 0.9998 | 07C1438          | 800 °C  | ✓                  | 0.129981 ± 0.000776 |
| ✓                | 136.5 ± 23.3  | 1172.0 ± 200.2     | 0.9987 | 07C1440          | 900 °C  | ✓                  | 0.116426 ± 0.000995 |
| ✓                | 228.4 ± 75.8  | 1730.9 ± 574.3     | 0.9998 | 07C1441          | 1000 °C | ✓                  | 0.131963 ± 0.000843 |
| ✓                | 270.4 ± 159.8 | 1972.0 ± 1165.3    | 0.9999 | 07C1442          | 1100 °C | ✓                  | 0.137119 ± 0.001282 |
| ✓                | 394.3 ± 154.5 | 2752.4 ± 1078.4    | 0.9997 | 07C1443          | 1250 °C | ✓                  | 0.143254 ± 0.001278 |
| ✓                | 316.9 ± 227.9 | 2318.5 ± 1667.3    | 0.9999 | 07C1445          | 1400 °C | ✓                  | 0.136703 ± 0.001461 |

| 40(a)/36(a) ± 2σ                |  | 40(r)/39(k) ± 2σ           |  | Age ± 2σ<br>(Ma)                                 |  | MSWD            | Results    |  | 40(a)/36(a) ± 2σ                |  |
|---------------------------------|--|----------------------------|--|--------------------------------------------------|--|-----------------|------------|--|---------------------------------|--|
|                                 |  |                            |  |                                                  |  |                 |            |  |                                 |  |
| 331.4175 ± 108.9331<br>± 32.87% |  | 6.1011 ± 0.5307<br>± 8.70% |  | 16.27 ± 1.41<br>± 8.69%                          |  | 0.15            | Isochron   |  | 331.7300 ± 107.0117<br>± 32.26% |  |
|                                 |  |                            |  | External Error ± 1.44<br>Analytical Error ± 1.41 |  |                 |            |  |                                 |  |
|                                 |  |                            |  |                                                  |  |                 |            |  |                                 |  |
| Statistical F Ratio             |  | 2.10                       |  | Convergence                                      |  | 0.0000004110    | Statistics |  | Statistical F Ratio             |  |
| Error Magnification             |  | 1.0000                     |  | Number of Iterations                             |  | 500             |            |  | Error Magnification             |  |
| n                               |  | 8                          |  | Calculated Line                                  |  | Weighted York-2 |            |  | n                               |  |
|                                 |  |                            |  |                                                  |  |                 |            |  |                                 |  |

| 36(a)/40(a+r) $\pm 2\sigma$ |  | r.i.   | Degassing Patterns |         |   | 36Ar(a)  | 36Ar(c)  | 36Ar(ca) | 36Ar(cl) |
|-----------------------------|--|--------|--------------------|---------|---|----------|----------|----------|----------|
| 0.000394 $\pm$ 0.000757     |  | 0.0014 | 07C1436            | 600 °C  | ✓ | 0.000009 | 0.000000 | 0.000023 | 0.000000 |
| 0.000662 $\pm$ 0.000152     |  | 0.0018 | 07C1437            | 700 °C  | ✓ | 0.000050 | 0.000000 | 0.000083 | 0.000000 |
| 0.000680 $\pm$ 0.000192     |  | 0.0042 | 07C1438            | 800 °C  | ✓ | 0.000069 | 0.000000 | 0.000120 | 0.000000 |
| 0.000853 $\pm$ 0.000146     |  | 0.0014 | 07C1440            | 900 °C  | ✓ | 0.000073 | 0.000000 | 0.000097 | 0.000000 |
| 0.000578 $\pm$ 0.000192     |  | 0.0014 | 07C1441            | 1000 °C | ✓ | 0.000037 | 0.000000 | 0.000084 | 0.000000 |
| 0.000507 $\pm$ 0.000300     |  | 0.0034 | 07C1442            | 1100 °C | ✓ | 0.000027 | 0.000000 | 0.000075 | 0.000000 |
| 0.000363 $\pm$ 0.000142     |  | 0.0076 | 07C1443            | 1250 °C | ✓ | 0.000036 | 0.000000 | 0.000147 | 0.000000 |
| 0.000431 $\pm$ 0.000310     |  | 0.0008 | 07C1445            | 1400 °C | ✓ | 0.000026 | 0.000000 | 0.000087 | 0.000000 |
|                             |  |        | $\Sigma$           |         |   | 0.000326 | 0.000000 | 0.000717 | 0.000000 |
|                             |  |        | $\Sigma$           |         |   |          |          |          | 0.001043 |

  

| 40(r)/39(k) $\pm 2\sigma$          | Age $\pm 2\sigma$<br>(Ma)       | MSWD |
|------------------------------------|---------------------------------|------|
| 6.1148 $\pm$ 0.5038<br>$\pm$ 8.24% | 16.31 $\pm$ 1.34<br>$\pm$ 8.24% | 0.20 |
| External Error $\pm$ 1.37          |                                 |      |
| Analytical Error $\pm$ 1.34        |                                 |      |
| Convergence                        | 0.0000000246                    |      |
| Number of Iterations               | 4                               |      |
| Calculated Line                    | Weighted York-2                 |      |



| 37Ar(ca) | 38Ar(a)  | 38Ar(c)  | 38Ar(k)  | 38Ar(ca) | 38Ar(cl) | 39Ar(k)  | 39Ar(ca) | 40Ar(r)  | 40Ar(a)  | 40Ar(c)  |
|----------|----------|----------|----------|----------|----------|----------|----------|----------|----------|----------|
| 0.088267 | 0.000002 | 0.000000 | 0.000032 | 0.000012 | 0.000000 | 0.002830 | 0.000059 | 0.019628 | 0.002586 | 0.000000 |
| 0.315532 | 0.000009 | 0.000000 | 0.000110 | 0.000044 | 0.000000 | 0.009697 | 0.000212 | 0.060773 | 0.014779 | 0.000000 |
| 0.455369 | 0.000013 | 0.000000 | 0.000151 | 0.000063 | 0.000000 | 0.013259 | 0.000306 | 0.081511 | 0.020493 | 0.000000 |
| 0.368067 | 0.000014 | 0.000000 | 0.000113 | 0.000051 | 0.000000 | 0.009965 | 0.000248 | 0.064009 | 0.021580 | 0.000000 |
| 0.319051 | 0.000007 | 0.000000 | 0.000095 | 0.000044 | 0.000000 | 0.008362 | 0.000215 | 0.052546 | 0.010817 | 0.000000 |
| 0.284062 | 0.000005 | 0.000000 | 0.000082 | 0.000039 | 0.000000 | 0.007219 | 0.000191 | 0.044761 | 0.007890 | 0.000000 |
| 0.555646 | 0.000007 | 0.000000 | 0.000160 | 0.000077 | 0.000000 | 0.014102 | 0.000374 | 0.087874 | 0.010569 | 0.000000 |
| 0.330539 | 0.000005 | 0.000000 | 0.000093 | 0.000046 | 0.000000 | 0.008145 | 0.000222 | 0.051985 | 0.007594 | 0.000000 |
| 2.716533 | 0.000061 | 0.000000 | 0.000837 | 0.000378 | 0.000000 | 0.073578 | 0.001828 | 0.463088 | 0.096307 | 0.000000 |
| 2.716533 |          |          |          |          | 0.001276 |          | 0.075406 |          |          |          |

| 40Ar(k)  | Additional Parameters |         |   | 40(r)/39(k) | 1 $\sigma$ | 40(r+a) | 1 $\sigma$ | 40Ar/39Ar | 1 $\sigma$ | 37Ar/39Ar | 1 $\sigma$ |
|----------|-----------------------|---------|---|-------------|------------|---------|------------|-----------|------------|-----------|------------|
| 0.000003 | 07C1436               | 600 °C  | ✓ | 6.936813    | 0.87901    | 0.02221 | 0.00005    | 7.69023   | 0.03322    | 30.55356  | 0.67966    |
| 0.000010 | 07C1437               | 700 °C  | ✓ | 6.267033    | 0.17674    | 0.07555 | 0.00006    | 7.62509   | 0.02664    | 31.84079  | 0.70940    |
| 0.000013 | 07C1438               | 800 °C  | ✓ | 6.147835    | 0.21886    | 0.10200 | 0.00014    | 7.52063   | 0.02173    | 33.56933  | 0.74158    |
| 0.000010 | 07C1440               | 900 °C  | ✓ | 6.423498    | 0.18699    | 0.08559 | 0.00006    | 8.38176   | 0.03469    | 36.04085  | 0.80558    |
| 0.000008 | 07C1441               | 1000 °C | ✓ | 6.284198    | 0.21559    | 0.06336 | 0.00005    | 7.38917   | 0.02268    | 37.20134  | 0.82868    |
| 0.000007 | 07C1442               | 1100 °C | ✓ | 6.200091    | 0.32428    | 0.05265 | 0.00011    | 7.10578   | 0.03229    | 38.33213  | 0.86090    |
| 0.000014 | 07C1443               | 1250 °C | ✓ | 6.231152    | 0.14964    | 0.09844 | 0.00025    | 6.80125   | 0.02957    | 38.38290  | 0.85723    |
| 0.000008 | 07C1445               | 1400 °C | ✓ | 6.382799    | 0.33699    | 0.05958 | 0.00007    | 7.12164   | 0.03687    | 39.50490  | 0.88974    |
| 0.000074 |                       |         |   |             |            |         |            |           |            |           |            |
| 0.559469 |                       |         |   |             |            |         |            |           |            |           |            |

| 36Ar/39Ar | 1 $\sigma$ | 37Ar<br>(decay) | 39Ar<br>(decay) | 40Ar<br>(moles) |
|-----------|------------|-----------------|-----------------|-----------------|
| 0.01110   | 0.00291    | 8.47340301      | 1.00076367      | 2.248E-21       |
| 0.01345   | 0.00055    | 8.47572787      | 1.00076377      | 7.647E-21       |
| 0.01397   | 0.00070    | 8.47816966      | 1.00076387      | 1.032E-20       |
| 0.01667   | 0.00058    | 8.48386989      | 1.00076411      | 8.663E-21       |
| 0.01409   | 0.00068    | 8.48631402      | 1.00076421      | 6.413E-21       |
| 0.01372   | 0.00104    | 8.48864242      | 1.00076431      | 5.329E-21       |
| 0.01260   | 0.00043    | 8.49108792      | 1.00076441      | 9.964E-21       |
| 0.01350   | 0.00108    | 8.49586451      | 1.00076461      | 6.030E-21       |

07C1436.AGE >>> JS5 >>> HLP PROJECT

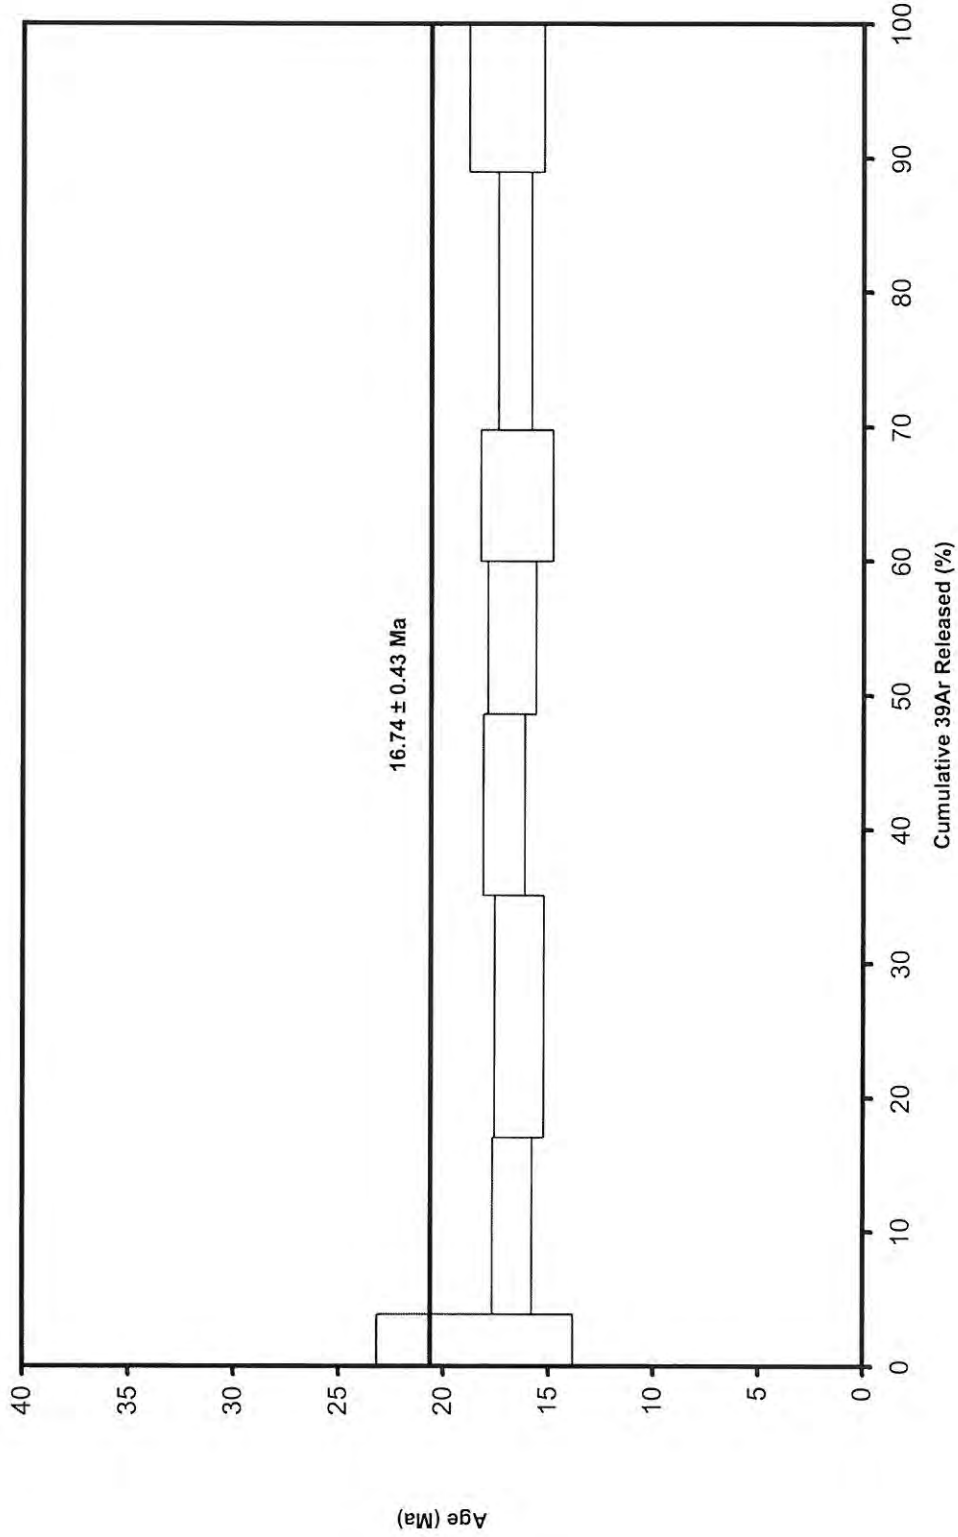

**Ar-Ages in Ma**

WEIGHTED PLATEAU  
 $16.74 \pm 0.43$

TOTAL FUSION  
 $16.78 \pm 0.48$

NORMAL ISOCHRON  
 $16.27 \pm 1.41$

INVERSE ISOCHRON  
 $16.31 \pm 1.34$

MSWD  
0.25

**Sample Info**

plagioclase  
Steens  
jh

IRR = OSU4E06  
J =  $0.0014849 \pm$

DR2013250 Camp

07C1436.AGE >>> JS5 >>> HLP PROJECT

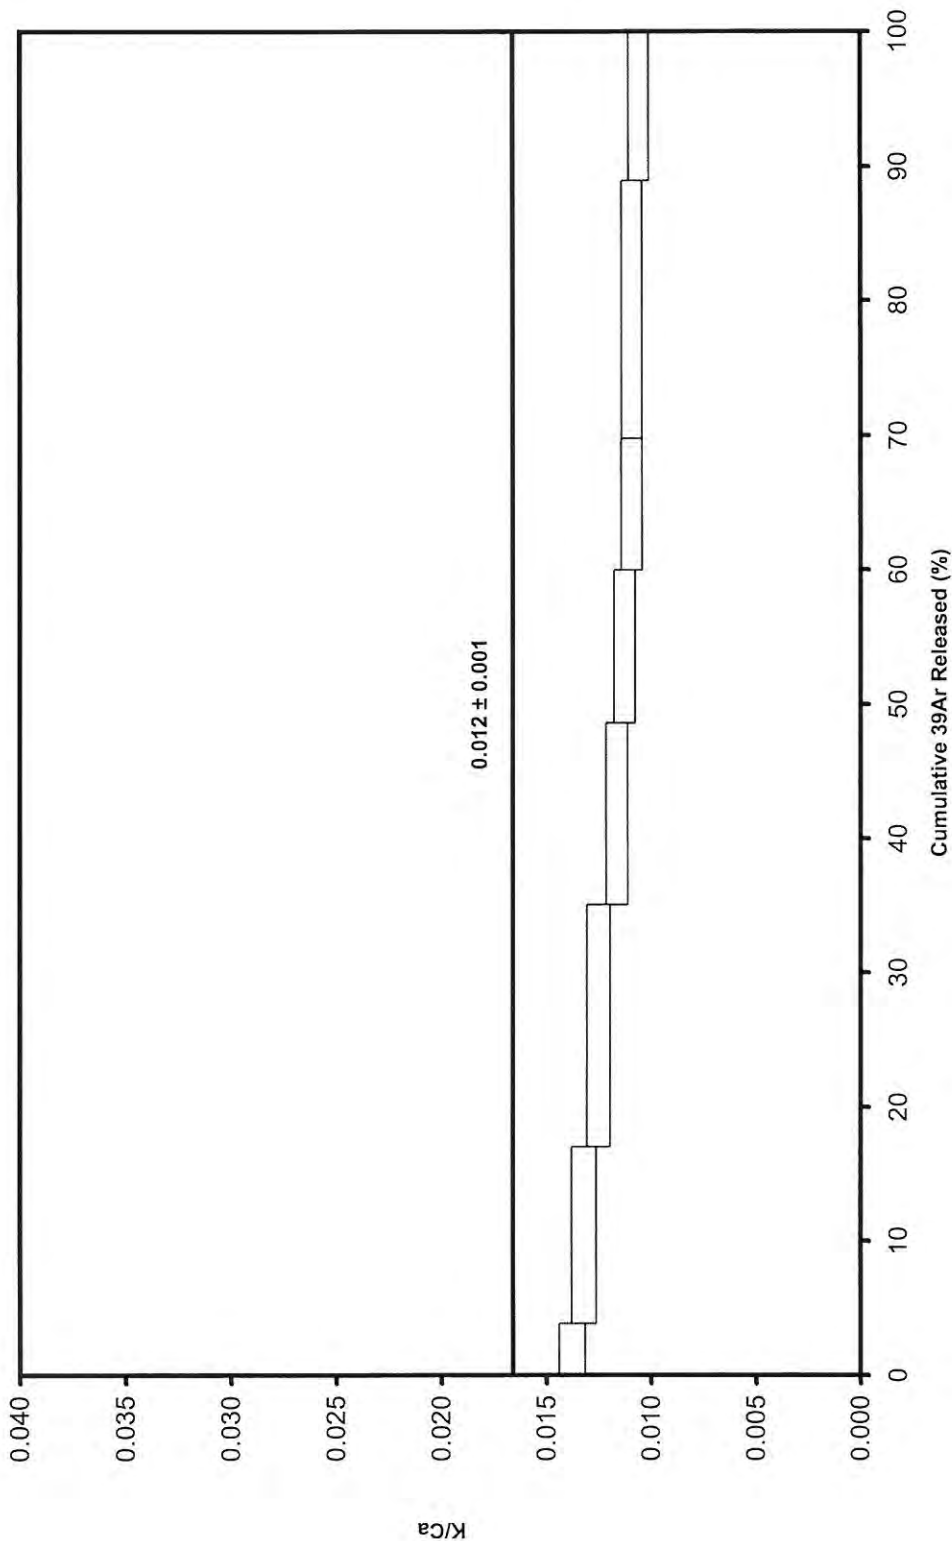

**Ar-Ages in Ma**

**WEIGHTED PLATEAU**  
16.74 ± 0.43

**TOTAL FUSION**  
16.78 ± 0.48

**NORMAL ISOCHRON**  
16.27 ± 1.41

**INVERSE ISOCHRON**  
16.31 ± 1.34

**Sample Info**

plagioclase  
Steens  
jh

IRR = OSU4E06  
J = 0.0014849 ±

DR2013250 Camp

07C1436.AGE >>> JS5 >>> HLP PROJECT

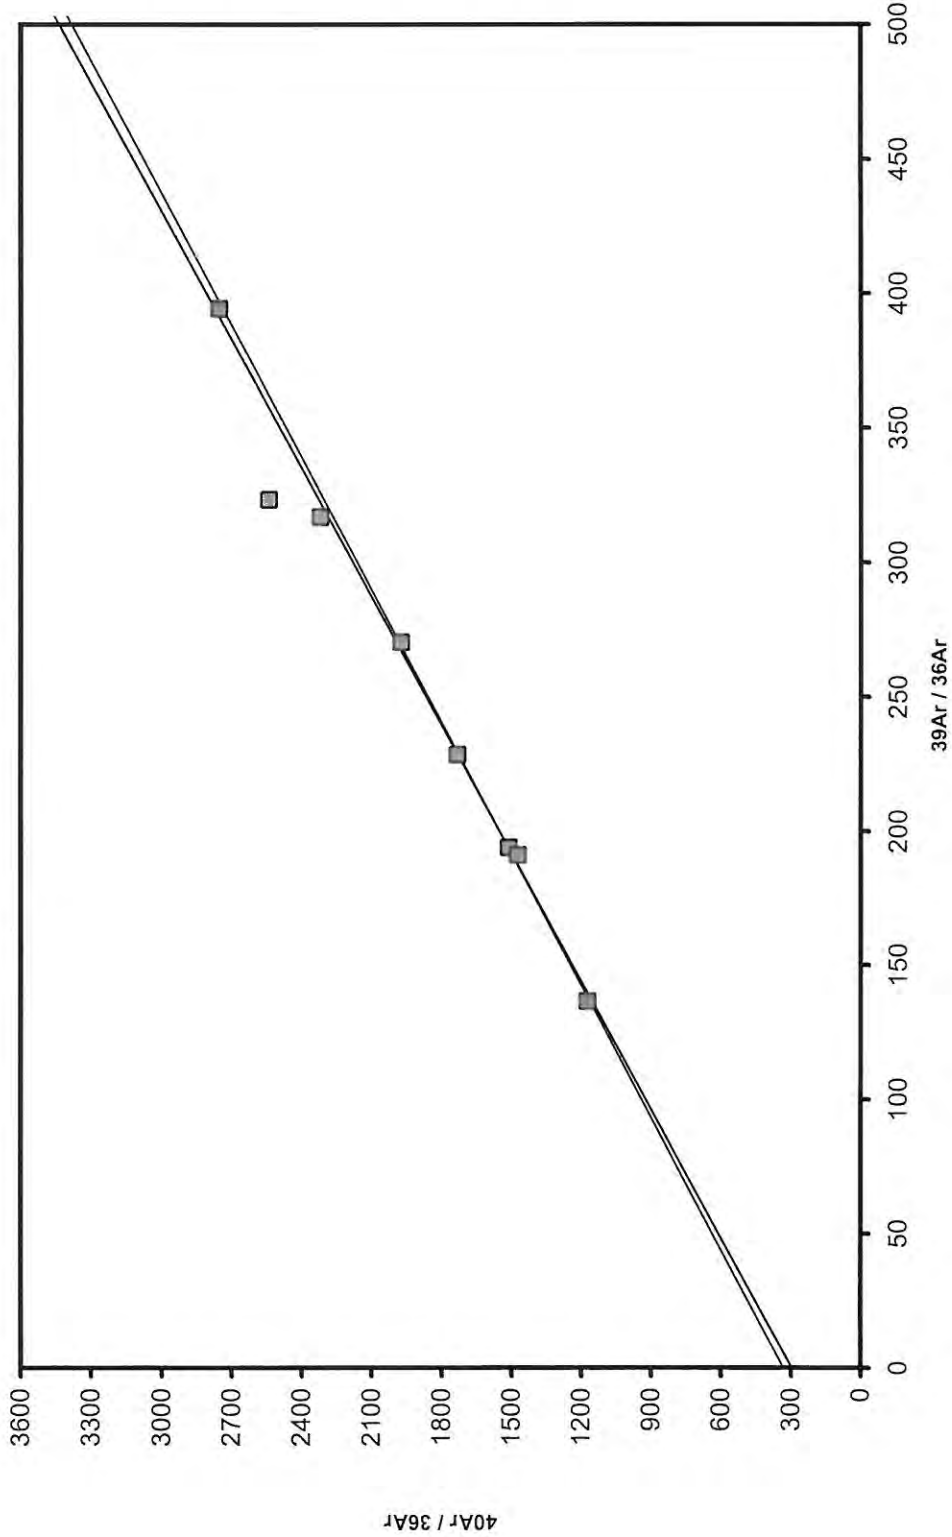

**Ar-Ages in Ma**

WEIGHTED PLATEAU  
16.74 ± 0.43

TOTAL FUSION  
16.78 ± 0.48

NORMAL ISOCHRON  
16.27 ± 1.41

INVERSE ISOCHRON  
16.31 ± 1.34

MSWD  
0.15

**Sample Info**

plagioclase  
Steens  
jh

IRR = OSU4E06  
J = 0.0014849 ±

DR2013250 Camp

07C1436.AGE >>> JS5 >>> HLP PROJECT

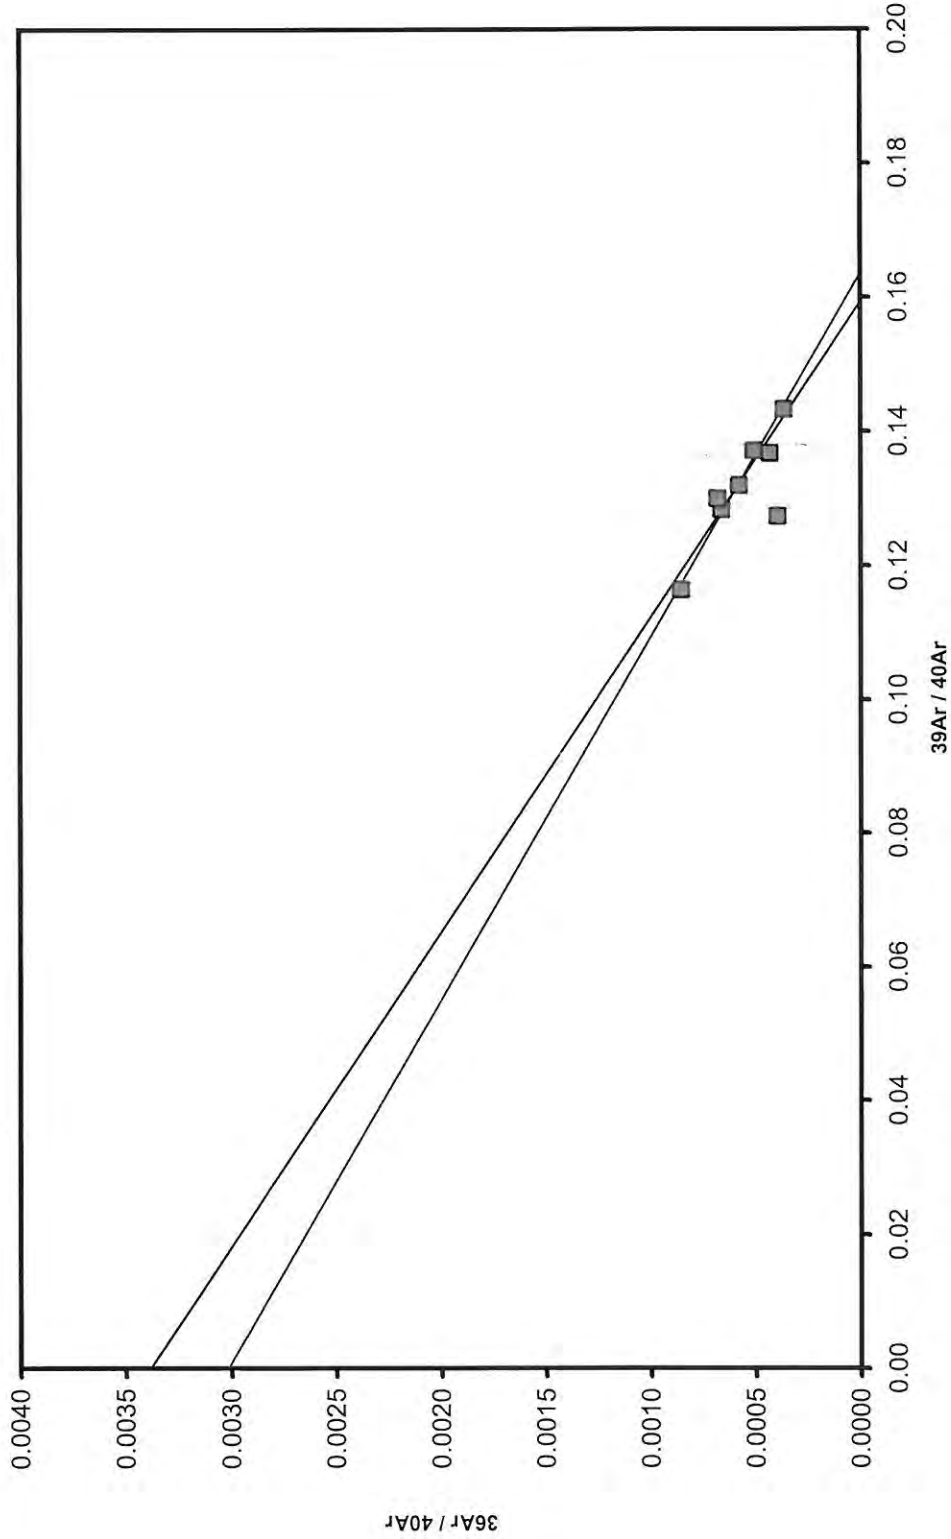

**Ar-Ages in Ma**

**WEIGHTED PLATEAU**  
16.74  $\pm$  0.43

**TOTAL FUSION**  
16.78  $\pm$  0.48

**NORMAL ISOCHRON**  
16.27  $\pm$  1.41

**INVERSE ISOCHRON**  
16.31  $\pm$  1.34

**MSWD**  
0.20

**Sample Info**

plagioclase  
Steens  
jh

**IRR = OSU4E06**  
**J = 0.0014849  $\pm$**

DR2013250 Camp

Age Data - Sample MD06-142

| Procedure |         | 36Ar     | 1σ       | 37Ar     | 1σ       | 38Ar     | 1σ       | 39Ar     | 1σ       | 40Ar     | 1σ       |
|-----------|---------|----------|----------|----------|----------|----------|----------|----------|----------|----------|----------|
| Blanks    |         |          |          |          |          |          |          |          |          |          |          |
| 07C868    | 500 °C  | 0.000060 | 0.000008 | 0.000023 | 0.000003 | 0.000009 | 0.000004 | 0.000039 | 0.000004 | 0.016770 | 0.000047 |
| 07C869    | 600 °C  | 0.000060 | 0.000008 | 0.000023 | 0.000003 | 0.000009 | 0.000004 | 0.000039 | 0.000004 | 0.016770 | 0.000047 |
| 07C870    | 700 °C  | 0.000060 | 0.000008 | 0.000023 | 0.000003 | 0.000009 | 0.000004 | 0.000039 | 0.000004 | 0.016770 | 0.000047 |
| 07C871    | 800 °C  | 0.000060 | 0.000008 | 0.000023 | 0.000003 | 0.000009 | 0.000004 | 0.000039 | 0.000004 | 0.016770 | 0.000047 |
| 07C872    | 900 °C  | 0.000060 | 0.000008 | 0.000023 | 0.000003 | 0.000009 | 0.000004 | 0.000039 | 0.000004 | 0.016770 | 0.000047 |
| 07C873    | 1000 °C | 0.000060 | 0.000008 | 0.000023 | 0.000003 | 0.000009 | 0.000004 | 0.000039 | 0.000004 | 0.020772 | 0.000047 |
| 07C874    | 1100 °C | 0.000077 | 0.000005 | 0.000023 | 0.000003 | 0.000009 | 0.000004 | 0.000039 | 0.000004 | 0.026282 | 0.000985 |
| 07C875    | 1200 °C | 0.000101 | 0.000007 | 0.000333 | 0.000003 | 0.000030 | 0.000002 | 0.000180 | 0.000005 | 0.032260 | 0.000034 |
| 07C876    | 1300 °C | 0.000144 | 0.000005 | 0.000767 | 0.000021 | 0.000057 | 0.000004 | 0.000464 | 0.000016 | 0.041654 | 0.000985 |
| 07C877    | 1400 °C | 0.000196 | 0.000005 | 0.001402 | 0.000009 | 0.000096 | 0.000004 | 0.000839 | 0.000008 | 0.051515 | 0.000109 |

These calculations are all relative to the FCT-3 biotite monitor age at 28.0 Ma, and have not yet been recalculated to the new 28.201 Ma mor



| Intercept<br>Values |         | 36Ar     | 1σ       | r2     |                | 37Ar     | 1σ       | r2     |               |
|---------------------|---------|----------|----------|--------|----------------|----------|----------|--------|---------------|
| 07C868              | 500 °C  | 0.000332 | 0.000002 | 0.9803 | LIN # 1 6 7 8  | 0.008403 | 0.000020 | 0.9966 | EXP # 4       |
| 07C869              | 600 °C  | 0.000099 | 0.000005 | 0.4603 | LIN # 1 2 5 9  | 0.011228 | 0.000048 | 0.9885 | LIN # 2 3 5 6 |
| 07C870              | 700 °C  | 0.000192 | 0.000005 | 0.7569 | LIN # 1 3 4 10 | 0.064954 | 0.000055 | 0.9978 | LIN # 3       |
| 07C871              | 800 °C  | 0.000393 | 0.000003 | 0.8103 | LIN # 7 8 10   | 0.189222 | 0.000139 | 0.9978 | LIN # 3       |
| 07C872              | 900 °C  | 0.000406 | 0.000006 | 0.5287 | LIN # 1 5      | 0.208140 | 0.000177 | 0.9978 | LIN # 3 6     |
| 07C873              | 1000 °C | 0.000208 | 0.000005 | 0.4784 | LIN # 3 4 9    | 0.097601 | 0.000152 | 0.9916 | EXP #         |
| 07C874              | 1100 °C | 0.000206 | 0.000013 | 0.0003 | LIN #          | 0.061628 | 0.000141 | 0.9835 | LIN #         |
| 07C875              | 1200 °C | 0.000177 | 0.000005 | 0.4796 | LIN # 7 10     | 0.036639 | 0.000071 | 0.9923 | LIN # 3 4     |
| 07C876              | 1300 °C | 0.000576 | 0.000004 | 0.0151 | LIN # 8        | 0.341053 | 0.000379 | 0.9971 | LIN # 1 3     |
| 07C877              | 1400 °C | 0.001002 | 0.000010 | 0.6116 | LIN # 1        | 0.678362 | 0.000817 | 0.9966 | LIN # 7       |

nitor age of Kuiper et al.(2008).

| 38Ar     | 1 $\sigma$ | r2     |              | 39Ar     | 1 $\sigma$ | r2     |               |
|----------|------------|--------|--------------|----------|------------|--------|---------------|
| 0.000120 | 0.000004   | 0.7721 | LIN # 1 2 4  | 0.001935 | 0.000019   | 0.9889 | LIN # 1 3 10  |
| 0.000064 | 0.000006   | 0.2365 | LIN # 2 6    | 0.001943 | 0.000011   | 0.9836 | LIN # 1       |
| 0.000152 | 0.000001   | 0.9262 | LIN # 1 6 10 | 0.009825 | 0.000040   | 0.0115 | LIN # 1 2 4 6 |
| 0.000416 | 0.000008   | 0.6112 | LIN # 1 3 4  | 0.027537 | 0.000054   | 0.9371 | LIN # 1 3 6 9 |
| 0.000402 | 0.000004   | 0.7657 | LIN #        | 0.030328 | 0.000020   | 0.9918 | LIN # 1 3 5   |
| 0.000217 | 0.000009   | 0.0667 | LIN # 1      | 0.014570 | 0.000006   | 0.9980 | LIN # 1 2 6 7 |
| 0.000158 | 0.000004   | 0.4594 | LIN #        | 0.009993 | 0.000033   | 0.0799 | LIN # 1 6 7   |
| 0.000127 | 0.000006   | 0.1226 | LIN #        | 0.006478 | 0.000016   | 0.8947 | LIN # 1 10    |
| 0.000720 | 0.000006   | 0.0207 | LIN # 4      | 0.051414 | 0.000074   | 0.9766 | LIN # 1 6 9   |
| 0.001315 | 0.000008   | 0.0775 | LIN # 1 3    | 0.100891 | 0.000141   | 0.9918 | LIN # 1 3 4   |

| 40Ar     | 1σ       | r2     |                  | Sample Parameters |         | Sample   | Material    |
|----------|----------|--------|------------------|-------------------|---------|----------|-------------|
| 0.104558 | 0.000153 | 0.9970 | PAR # 1 4 5      | 07C868            | 500 °C  | MD06-142 | plagioclase |
| 0.037601 | 0.000156 | 0.8326 | LIN # 1 2 5 6    | 07C869            | 600 °C  | MD06-142 | plagioclase |
| 0.095478 | 0.000072 | 0.0042 | LIN # 1 2 5 6 10 | 07C870            | 700 °C  | MD06-142 | plagioclase |
| 0.221773 | 0.000098 | 0.9976 | LIN # 1 2 6 7    | 07C871            | 800 °C  | MD06-142 | plagioclase |
| 0.229482 | 0.000250 | 0.9610 | EXP # 2 7 9      | 07C872            | 900 °C  | MD06-142 | plagioclase |
| 0.119000 | 0.000026 | 0.9840 | EXP # 4 5 8 10   | 07C873            | 1000 °C | MD06-142 | plagioclase |
| 0.101225 | 0.000058 | 0.9583 | LIN # 1 3 7      | 07C874            | 1100 °C | MD06-142 | plagioclase |
| 0.077642 | 0.000089 | 0.8256 | EXP # 1 2 6      | 07C875            | 1200 °C | MD06-142 | plagioclase |
| 0.371436 | 0.000275 | 0.9927 | LIN # 1          | 07C876            | 1300 °C | MD06-142 | plagioclase |
| 0.683275 | 0.000502 | 0.9958 | LIN # 3 8        | 07C877            | 1400 °C | MD06-142 | plagioclase |

| Location | Analyst | Temp | Standard<br>(in Ma) | %1 $\sigma$ | J         | %1 $\sigma$ |
|----------|---------|------|---------------------|-------------|-----------|-------------|
| OR       | jh      | 500  | 28.03               | 0.01        | 0.0015191 | 0.32        |
| OR       | jh      | 600  | 28.03               | 0.01        | 0.0015191 | 0.32        |
| OR       | jh      | 700  | 28.03               | 0.01        | 0.0015191 | 0.32        |
| OR       | jh      | 800  | 28.03               | 0.01        | 0.0015191 | 0.32        |
| OR       | jh      | 900  | 28.03               | 0.01        | 0.0015191 | 0.32        |
| OR       | jh      | 1000 | 28.03               | 0.01        | 0.0015191 | 0.32        |
| OR       | jh      | 1100 | 28.03               | 0.01        | 0.0015191 | 0.32        |
| OR       | jh      | 1200 | 28.03               | 0.01        | 0.0015191 | 0.32        |
| OR       | jh      | 1300 | 28.03               | 0.01        | 0.0015191 | 0.32        |
| OR       | jh      | 1400 | 28.03               | 0.01        | 0.0015191 | 0.32        |

| MDF     | %1 $\sigma$ | Volume Ratio | Sensitivity (mol/vol) | Day | Month | Year | Hour | Min | Resist | Irradiation | Project | Standard Name | Irradiation Constants |
|---------|-------------|--------------|-----------------------|-----|-------|------|------|-----|--------|-------------|---------|---------------|-----------------------|
| 1.00378 | 0.16        | 1.0144       | 1.012E-19             | 28  | 02    | 2007 | 10   | 29  | 001    | OSU4E06     | Camp    | FCT-3         | 07C868                |
| 1.00378 | 0.16        | 1.0145       | 1.012E-19             | 28  | 02    | 2007 | 10   | 59  | 001    | OSU4E06     | Camp    | FCT-3         | 07C869                |
| 1.00378 | 0.16        | 1.0144       | 1.012E-19             | 28  | 02    | 2007 | 11   | 31  | 001    | OSU4E06     | Camp    | FCT-3         | 07C870                |
| 1.00378 | 0.16        | 1.0146       | 1.012E-19             | 28  | 02    | 2007 | 12   | 03  | 001    | OSU4E06     | Camp    | FCT-3         | 07C871                |
| 1.00378 | 0.16        | 1.0146       | 1.012E-19             | 28  | 02    | 2007 | 12   | 32  | 001    | OSU4E06     | Camp    | FCT-3         | 07C872                |
| 1.00378 | 0.16        | 1.0145       | 1.012E-19             | 28  | 02    | 2007 | 13   | 01  | 001    | OSU4E06     | Camp    | FCT-3         | 07C873                |
| 1.00378 | 0.16        | 1.0145       | 1.012E-19             | 28  | 02    | 2007 | 13   | 32  | 001    | OSU4E06     | Camp    | FCT-3         | 07C874                |
| 1.00378 | 0.16        | 1.0144       | 1.012E-19             | 28  | 02    | 2007 | 14   | 03  | 001    | OSU4E06     | Camp    | FCT-3         | 07C875                |
| 1.00378 | 0.16        | 1.0146       | 1.012E-19             | 28  | 02    | 2007 | 14   | 35  | 001    | OSU4E06     | Camp    | FCT-3         | 07C876                |
| 1.00378 | 0.16        | 1.0146       | 1.012E-19             | 28  | 02    | 2007 | 15   | 02  | 001    | OSU4E06     | Camp    | FCT-3         | 07C877                |

|         | 40/36(a) | %1σ | 40/36(c) | %1σ | 38/36(a) | %1σ | 38/36(c) | %1σ | 39/37(ca) | %1σ | 38/37(ca) | %1σ | 36/37(ca) | %1σ |
|---------|----------|-----|----------|-----|----------|-----|----------|-----|-----------|-----|-----------|-----|-----------|-----|
| 500 °C  | 295.5    | 0   | 0.018    | 35  | 0.1869   | 0   | 1.493    | 3   | 0.000673  | 0   | 0.000139  | 0   | 0.000264  | 0   |
| 600 °C  | 295.5    | 0   | 0.018    | 35  | 0.1869   | 0   | 1.493    | 3   | 0.000673  | 0   | 0.000139  | 0   | 0.000264  | 0   |
| 700 °C  | 295.5    | 0   | 0.018    | 35  | 0.1869   | 0   | 1.493    | 3   | 0.000673  | 0   | 0.000139  | 0   | 0.000264  | 0   |
| 800 °C  | 295.5    | 0   | 0.018    | 35  | 0.1869   | 0   | 1.493    | 3   | 0.000673  | 0   | 0.000139  | 0   | 0.000264  | 0   |
| 900 °C  | 295.5    | 0   | 0.018    | 35  | 0.1869   | 0   | 1.493    | 3   | 0.000673  | 0   | 0.000139  | 0   | 0.000264  | 0   |
| 1000 °C | 295.5    | 0   | 0.018    | 35  | 0.1869   | 0   | 1.493    | 3   | 0.000673  | 0   | 0.000139  | 0   | 0.000264  | 0   |
| 1100 °C | 295.5    | 0   | 0.018    | 35  | 0.1869   | 0   | 1.493    | 3   | 0.000673  | 0   | 0.000139  | 0   | 0.000264  | 0   |
| 1200 °C | 295.5    | 0   | 0.018    | 35  | 0.1869   | 0   | 1.493    | 3   | 0.000673  | 0   | 0.000139  | 0   | 0.000264  | 0   |
| 1300 °C | 295.5    | 0   | 0.018    | 35  | 0.1869   | 0   | 1.493    | 3   | 0.000673  | 0   | 0.000139  | 0   | 0.000264  | 0   |
| 1400 °C | 295.5    | 0   | 0.018    | 35  | 0.1869   | 0   | 1.493    | 3   | 0.000673  | 0   | 0.000139  | 0   | 0.000264  | 0   |

| 40/39(k) | %1σ | 38/39(k) | %1σ | 36/38(cl) | %1σ | K/Ca | %1σ | K/Cl | %1σ | Ca/Cl | %1σ |
|----------|-----|----------|-----|-----------|-----|------|-----|------|-----|-------|-----|
| 0.00101  | 0   | 0.01138  | 0   | 0         | 0   | 0.43 | 0   | 0    | 0   | 0     | 0   |
| 0.00101  | 0   | 0.01138  | 0   | 0         | 0   | 0.43 | 0   | 0    | 0   | 0     | 0   |
| 0.00101  | 0   | 0.01138  | 0   | 0         | 0   | 0.43 | 0   | 0    | 0   | 0     | 0   |
| 0.00101  | 0   | 0.01138  | 0   | 0         | 0   | 0.43 | 0   | 0    | 0   | 0     | 0   |
| 0.00101  | 0   | 0.01138  | 0   | 0         | 0   | 0.43 | 0   | 0    | 0   | 0     | 0   |
| 0.00101  | 0   | 0.01138  | 0   | 0         | 0   | 0.43 | 0   | 0    | 0   | 0     | 0   |
| 0.00101  | 0   | 0.01138  | 0   | 0         | 0   | 0.43 | 0   | 0    | 0   | 0     | 0   |
| 0.00101  | 0   | 0.01138  | 0   | 0         | 0   | 0.43 | 0   | 0    | 0   | 0     | 0   |
| 0.00101  | 0   | 0.01138  | 0   | 0         | 0   | 0.43 | 0   | 0    | 0   | 0     | 0   |
| 0.00101  | 0   | 0.01138  | 0   | 0         | 0   | 0.43 | 0   | 0    | 0   | 0     | 0   |
| 0.00101  | 0   | 0.01138  | 0   | 0         | 0   | 0.43 | 0   | 0    | 0   | 0     | 0   |

| Incremental Heating |         |   |
|---------------------|---------|---|
| 07C868              | 500 °C  | ✓ |
| 07C869              | 600 °C  | ✓ |
| 07C870              | 700 °C  | ✓ |
| 07C871              | 800 °C  | ✓ |
| 07C872              | 900 °C  | ✓ |
| 07C873              | 1000 °C | ✓ |
| 07C874              | 1100 °C | ✓ |
| 07C875              | 1200 °C | ✓ |
| 07C876              | 1300 °C | ✓ |
| 07C877              | 1400 °C | ✓ |

Σ

| Information on Analysis   |  |
|---------------------------|--|
| MD06-142                  |  |
| plagioclase               |  |
| OR                        |  |
| jh                        |  |
| Project = Camp            |  |
| Irradiation = OSU4E06     |  |
| J = 0.0015191 ± 0.0000049 |  |
| FCT-3 = 28.030 ± 0.003 Ma |  |

| 36Ar(a)  | 37Ar(ca) | 38Ar(cl) | 39Ar(k)  | 40Ar(r)  | Age $\pm 2\sigma$<br>(Ma) | 40Ar(r)<br>(%) | 39Ar(k)<br>(%) | K/Ca $\pm 2\sigma$ | Normal<br>Isochron |         |
|----------|----------|----------|----------|----------|---------------------------|----------------|----------------|--------------------|--------------------|---------|
| 0.000264 | 0.032778 | 0.000036 | 0.001896 | 0.011199 | 16.12 $\pm$ 7.01          | 12.54          | 0.75           | 0.025 $\pm$ 0.001  | 07C868             | 500 °C  |
| 0.000029 | 0.043851 | 0.000022 | 0.001897 | 0.012903 | 18.54 $\pm$ 7.97          | 60.36          | 0.75           | 0.019 $\pm$ 0.001  | 07C869             | 600 °C  |
| 0.000065 | 0.254174 | 0.000000 | 0.009725 | 0.060749 | 17.04 $\pm$ 1.52          | 75.86          | 3.87           | 0.016 $\pm$ 0.000  | 07C870             | 700 °C  |
| 0.000138 | 0.741092 | 0.000000 | 0.027310 | 0.167302 | 16.71 $\pm$ 0.54          | 80.34          | 10.86          | 0.016 $\pm$ 0.000  | 07C871             | 800 °C  |
| 0.000132 | 0.815519 | 0.000000 | 0.030083 | 0.177160 | 16.07 $\pm$ 0.57          | 82.00          | 11.96          | 0.016 $\pm$ 0.000  | 07C872             | 900 °C  |
| 0.000047 | 0.382479 | 0.000000 | 0.014437 | 0.085950 | 16.24 $\pm$ 1.02          | 85.99          | 5.74           | 0.016 $\pm$ 0.000  | 07C873             | 1000 °C |
| 0.000066 | 0.241580 | 0.000000 | 0.009903 | 0.056870 | 15.67 $\pm$ 2.38          | 74.43          | 3.94           | 0.018 $\pm$ 0.001  | 07C874             | 1100 °C |
| 0.000040 | 0.142434 | 0.000000 | 0.006275 | 0.034597 | 15.05 $\pm$ 2.13          | 74.40          | 2.49           | 0.019 $\pm$ 0.001  | 07C875             | 1200 °C |
| 0.000082 | 1.335723 | 0.000000 | 0.050633 | 0.311062 | 16.76 $\pm$ 0.31          | 92.80          | 20.13          | 0.016 $\pm$ 0.000  | 07C876             | 1300 °C |
| 0.000107 | 2.658244 | 0.000000 | 0.099403 | 0.610063 | 16.74 $\pm$ 0.27          | 95.06          | 39.51          | 0.016 $\pm$ 0.000  | 07C877             | 1400 °C |

|          |          |          |          |          |
|----------|----------|----------|----------|----------|
| 0.000970 | 6.647874 | 0.000058 | 0.251560 | 1.527855 |
|----------|----------|----------|----------|----------|

| Results          | 40(r)/39(k) $\pm 2\sigma$          | Age $\pm 2\sigma$<br>(Ma)       | MSWD   | 39Ar(k)<br>(%,n)    | K/Ca $\pm 2\sigma$ | Results        |
|------------------|------------------------------------|---------------------------------|--------|---------------------|--------------------|----------------|
| Weighted Plateau | 6.1047 $\pm$ 0.0655<br>$\pm$ 1.07% | 16.65 $\pm$ 0.21<br>$\pm$ 1.24% | 1.03   | 100.00<br>10        | 0.017 $\pm$ 0.001  | No Convergence |
|                  |                                    | External Error $\pm$ 0.34       | 2.26   | Statistical T Ratio |                    |                |
|                  |                                    | Analytical Error $\pm$ 0.18     | 1.0131 | Error Magnification |                    |                |
| Total Fusion Age | 6.0735 $\pm$ 0.0810<br>$\pm$ 1.33% | 16.57 $\pm$ 0.24<br>$\pm$ 1.47% |        | 10                  | 0.000 $\pm$ 0.000  | Statistics     |
|                  |                                    | External Error $\pm$ 0.36       |        |                     |                    |                |
|                  |                                    | Analytical Error $\pm$ 0.22     |        |                     |                    |                |



| 39(k)/36(a) $\pm 2\sigma$ |                   | 40(a+r)/36(a) $\pm 2\sigma$ | r.i.   | Inverse Isochron |         | 39(k)/40(a+r) $\pm 2\sigma$ |                         |
|---------------------------|-------------------|-----------------------------|--------|------------------|---------|-----------------------------|-------------------------|
| ✓                         | 7.2 $\pm$ 0.5     | 337.9 $\pm$ 21.1            | 0.9488 | 07C868           | 500 °C  | ✓                           | 0.021232 $\pm$ 0.000441 |
| ✓                         | 66.2 $\pm$ 43.5   | 745.6 $\pm$ 490.0           | 0.9995 | 07C869           | 600 °C  | ✓                           | 0.088765 $\pm$ 0.001776 |
| ✓                         | 148.7 $\pm$ 41.6  | 1224.5 $\pm$ 342.4          | 0.9994 | 07C870           | 700 °C  | ✓                           | 0.121449 $\pm$ 0.001129 |
| ✓                         | 197.3 $\pm$ 25.9  | 1503.9 $\pm$ 197.2          | 0.9992 | 07C871           | 800 °C  | ✓                           | 0.131163 $\pm$ 0.000698 |
| ✓                         | 228.7 $\pm$ 37.0  | 1642.3 $\pm$ 265.7          | 0.9996 | 07C872           | 900 °C  | ✓                           | 0.139251 $\pm$ 0.000600 |
| ✓                         | 305.0 $\pm$ 118.3 | 2111.1 $\pm$ 818.8          | 1.0000 | 07C873           | 1000 °C | ✓                           | 0.144455 $\pm$ 0.000520 |
| ✓                         | 149.8 $\pm$ 64.8  | 1156.0 $\pm$ 500.4          | 0.9981 | 07C874           | 1100 °C | ✓                           | 0.129621 $\pm$ 0.003484 |
| ✓                         | 155.9 $\pm$ 64.3  | 1154.8 $\pm$ 476.3          | 0.9998 | 07C875           | 1200 °C | ✓                           | 0.134962 $\pm$ 0.001024 |
| ✓                         | 621.0 $\pm$ 132.5 | 4110.8 $\pm$ 877.2          | 0.9994 | 07C876           | 1300 °C | ✓                           | 0.151073 $\pm$ 0.001144 |
| ✓                         | 930.4 $\pm$ 281.4 | 6005.5 $\pm$ 1816.0         | 0.9999 | 07C877           | 1400 °C | ✓                           | 0.154921 $\pm$ 0.000723 |

| 40(a)/36(a) ± 2σ              |  | 40(r)/39(k) ± 2σ           |  | Age ± 2σ<br>(Ma)                                                            | MSWD            | Results    | 40(a)/36(a) ± 2σ              |  |
|-------------------------------|--|----------------------------|--|-----------------------------------------------------------------------------|-----------------|------------|-------------------------------|--|
|                               |  |                            |  |                                                                             |                 |            |                               |  |
| 288.2885 ± 20.9596<br>± 7.27% |  | 6.0913 ± 0.0995<br>± 1.63% |  | 16.62 ± 0.29<br>± 1.75%<br>External Error ± 0.39<br>Analytical Error ± 0.27 | 1.52            | Isochron   | 291.0095 ± 17.8370<br>± 6.13% |  |
|                               |  |                            |  |                                                                             |                 | Statistics |                               |  |
| Statistical F Ratio           |  | 1.94                       |  | Convergence                                                                 | 0.0000362246    |            | Statistical F Ratio           |  |
| Error Magnification           |  | 1.2342                     |  | Number of Iterations                                                        | 500             |            | Error Magnification           |  |
| n                             |  | 10                         |  | Calculated Line                                                             | Weighted York-2 |            | n                             |  |

| $36(a)/40(a+r) \pm 2\sigma$ |  | r.i.   | Degassing Patterns |         |   | 36Ar(a)  | 36Ar(c)  | 36Ar(ca) | 36Ar(cl) |
|-----------------------------|--|--------|--------------------|---------|---|----------|----------|----------|----------|
| 0.002960 $\pm$ 0.000185     |  | 0.0101 | 07C868             | 500 °C  | ✓ | 0.000264 | 0.000000 | 0.000009 | 0.000000 |
| 0.001341 $\pm$ 0.000881     |  | 0.0182 | 07C869             | 600 °C  | ✓ | 0.000029 | 0.000000 | 0.000012 | 0.000000 |
| 0.000817 $\pm$ 0.000228     |  | 0.0018 | 07C870             | 700 °C  | ✓ | 0.000065 | 0.000000 | 0.000067 | 0.000000 |
| 0.000665 $\pm$ 0.000087     |  | 0.0016 | 07C871             | 800 °C  | ✓ | 0.000138 | 0.000000 | 0.000196 | 0.000000 |
| 0.000609 $\pm$ 0.000099     |  | 0.0082 | 07C872             | 900 °C  | ✓ | 0.000132 | 0.000000 | 0.000215 | 0.000000 |
| 0.000474 $\pm$ 0.000184     |  | 0.0008 | 07C873             | 1000 °C | ✓ | 0.000047 | 0.000000 | 0.000101 | 0.000000 |
| 0.000865 $\pm$ 0.000374     |  | 0.0573 | 07C874             | 1100 °C | ✓ | 0.000066 | 0.000000 | 0.000064 | 0.000000 |
| 0.000866 $\pm$ 0.000357     |  | 0.0055 | 07C875             | 1200 °C | ✓ | 0.000040 | 0.000000 | 0.000038 | 0.000000 |
| 0.000243 $\pm$ 0.000052     |  | 0.0231 | 07C876             | 1300 °C | ✓ | 0.000082 | 0.000000 | 0.000353 | 0.000000 |
| 0.000167 $\pm$ 0.000050     |  | 0.0019 | 07C877             | 1400 °C | ✓ | 0.000107 | 0.000000 | 0.000702 | 0.000000 |
|                             |  |        | $\Sigma$           |         |   | 0.000970 | 0.000000 | 0.001755 | 0.000000 |
|                             |  |        | $\Sigma$           |         |   |          |          |          | 0.002725 |

  

| $40(r)/39(k) \pm 2\sigma$          | Age $\pm 2\sigma$<br>(Ma)       | MSWD |
|------------------------------------|---------------------------------|------|
| 6.1149 $\pm$ 0.0786<br>$\pm$ 1.29% | 16.68 $\pm$ 0.24<br>$\pm$ 1.43% | 1.12 |
| External Error $\pm$ 0.36          |                                 |      |
| Analytical Error $\pm$ 0.21        |                                 |      |
| Convergence                        | 0.0000001040                    |      |
| Number of Iterations               | 4                               |      |
| Calculated Line                    | Weighted York-2                 |      |

| 37Ar(ca) | 38Ar(a)  | 38Ar(c)  | 38Ar(k)  | 38Ar(ca) | 38Ar(cl) | 39Ar(k)  | 39Ar(ca) | 40Ar(r)  | 40Ar(a)  | 40Ar(c)  |
|----------|----------|----------|----------|----------|----------|----------|----------|----------|----------|----------|
| 0.032778 | 0.000049 | 0.000000 | 0.000022 | 0.000005 | 0.000036 | 0.001896 | 0.000022 | 0.011199 | 0.078093 | 0.000000 |
| 0.043851 | 0.000005 | 0.000000 | 0.000022 | 0.000006 | 0.000022 | 0.001897 | 0.000030 | 0.012903 | 0.008471 | 0.000000 |
| 0.254174 | 0.000012 | 0.000000 | 0.000111 | 0.000035 | 0.000000 | 0.009725 | 0.000171 | 0.060749 | 0.019324 | 0.000000 |
| 0.741092 | 0.000026 | 0.000000 | 0.000311 | 0.000103 | 0.000000 | 0.027310 | 0.000499 | 0.167302 | 0.040911 | 0.000000 |
| 0.815519 | 0.000025 | 0.000000 | 0.000342 | 0.000113 | 0.000000 | 0.030083 | 0.000549 | 0.177160 | 0.038871 | 0.000000 |
| 0.382479 | 0.000009 | 0.000000 | 0.000164 | 0.000053 | 0.000000 | 0.014437 | 0.000257 | 0.085950 | 0.013989 | 0.000000 |
| 0.241580 | 0.000012 | 0.000000 | 0.000113 | 0.000034 | 0.000000 | 0.009903 | 0.000163 | 0.056870 | 0.019530 | 0.000000 |
| 0.142434 | 0.000008 | 0.000000 | 0.000071 | 0.000020 | 0.000000 | 0.006275 | 0.000096 | 0.034597 | 0.011897 | 0.000000 |
| 1.335723 | 0.000015 | 0.000000 | 0.000576 | 0.000186 | 0.000000 | 0.050633 | 0.000899 | 0.311062 | 0.024092 | 0.000000 |
| 2.658244 | 0.000020 | 0.000000 | 0.001131 | 0.000369 | 0.000000 | 0.099403 | 0.001789 | 0.610063 | 0.031572 | 0.000000 |
| 6.647874 | 0.000181 | 0.000000 | 0.002863 | 0.000924 | 0.000058 | 0.251560 | 0.004474 | 1.527855 | 0.286748 | 0.000000 |
| 6.647874 |          |          |          |          | 0.004026 |          | 0.256034 |          |          |          |

| 40Ar(k)  | Additional Parameters |         |   | 40(r)/39(k) | 1 $\sigma$ | 40(r+a) | 1 $\sigma$ | 40Ar/39Ar | 1 $\sigma$ | 37Ar/39Ar | 1 $\sigma$ |
|----------|-----------------------|---------|---|-------------|------------|---------|------------|-----------|------------|-----------|------------|
| 0.000002 | 07C868                | 500 °C  | ✓ | 5.906851    | 1.29089    | 0.08929 | 0.00016    | 46.55715  | 0.47791    | 17.09013  | 0.30360    |
| 0.000002 | 07C869                | 600 °C  | ✓ | 6.800946    | 1.46997    | 0.02137 | 0.00017    | 11.09419  | 0.11027    | 22.75924  | 0.37082    |
| 0.000010 | 07C870                | 700 °C  | ✓ | 6.246825    | 0.27940    | 0.08007 | 0.00009    | 8.09254   | 0.03693    | 25.68509  | 0.38825    |
| 0.000028 | 07C871                | 800 °C  | ✓ | 6.126050    | 0.09957    | 0.20821 | 0.00011    | 7.48834   | 0.01947    | 26.64971  | 0.39099    |
| 0.000030 | 07C872                | 900 °C  | ✓ | 5.889130    | 0.10541    | 0.21603 | 0.00026    | 7.05359   | 0.01490    | 26.62361  | 0.38773    |
| 0.000015 | 07C873                | 1000 °C | ✓ | 5.953590    | 0.18823    | 0.09994 | 0.00005    | 6.80228   | 0.01193    | 26.02934  | 0.38046    |
| 0.000010 | 07C874                | 1100 °C | ✓ | 5.742696    | 0.43807    | 0.07640 | 0.00099    | 7.59119   | 0.10187    | 24.00040  | 0.36183    |
| 0.000006 | 07C875                | 1200 °C | ✓ | 5.513531    | 0.39168    | 0.04649 | 0.00010    | 7.29898   | 0.02734    | 22.35775  | 0.33328    |
| 0.000051 | 07C876                | 1300 °C | ✓ | 6.143496    | 0.05633    | 0.33515 | 0.00102    | 6.50484   | 0.02442    | 25.92041  | 0.37991    |
| 0.000100 | 07C877                | 1400 °C | ✓ | 6.137300    | 0.05013    | 0.64164 | 0.00052    | 6.34179   | 0.01447    | 26.26942  | 0.38510    |
| 0.000254 |                       |         |   |             |            |         |            |           |            |           |            |
| 1.814857 |                       |         |   |             |            |         |            |           |            |           |            |

| 36Ar/39Ar | 1 $\sigma$ | 37Ar<br>(decay) | 39Ar<br>(decay) | 40Ar<br>(moles) |
|-----------|------------|-----------------|-----------------|-----------------|
| 0.14230   | 0.00454    | 3.89937299      | 1.00048624      | 9.036E-21       |
| 0.02089   | 0.00489    | 3.90097791      | 1.00048639      | 2.163E-21       |
| 0.01339   | 0.00092    | 3.90269055      | 1.00048655      | 8.104E-21       |
| 0.01201   | 0.00031    | 3.90440395      | 1.00048670      | 2.107E-20       |
| 0.01132   | 0.00033    | 3.90595737      | 1.00048685      | 2.187E-20       |
| 0.01009   | 0.00062    | 3.90751140      | 1.00048699      | 1.012E-20       |
| 0.01290   | 0.00142    | 3.90917329      | 1.00048714      | 7.733E-21       |
| 0.01222   | 0.00130    | 3.91083589      | 1.00048729      | 4.706E-21       |
| 0.00843   | 0.00014    | 3.91255286      | 1.00048745      | 3.392E-20       |
| 0.00799   | 0.00013    | 3.91400215      | 1.00048758      | 6.494E-20       |

07C868.AGE >>> MD06-142 >>> CAMP PROJECT

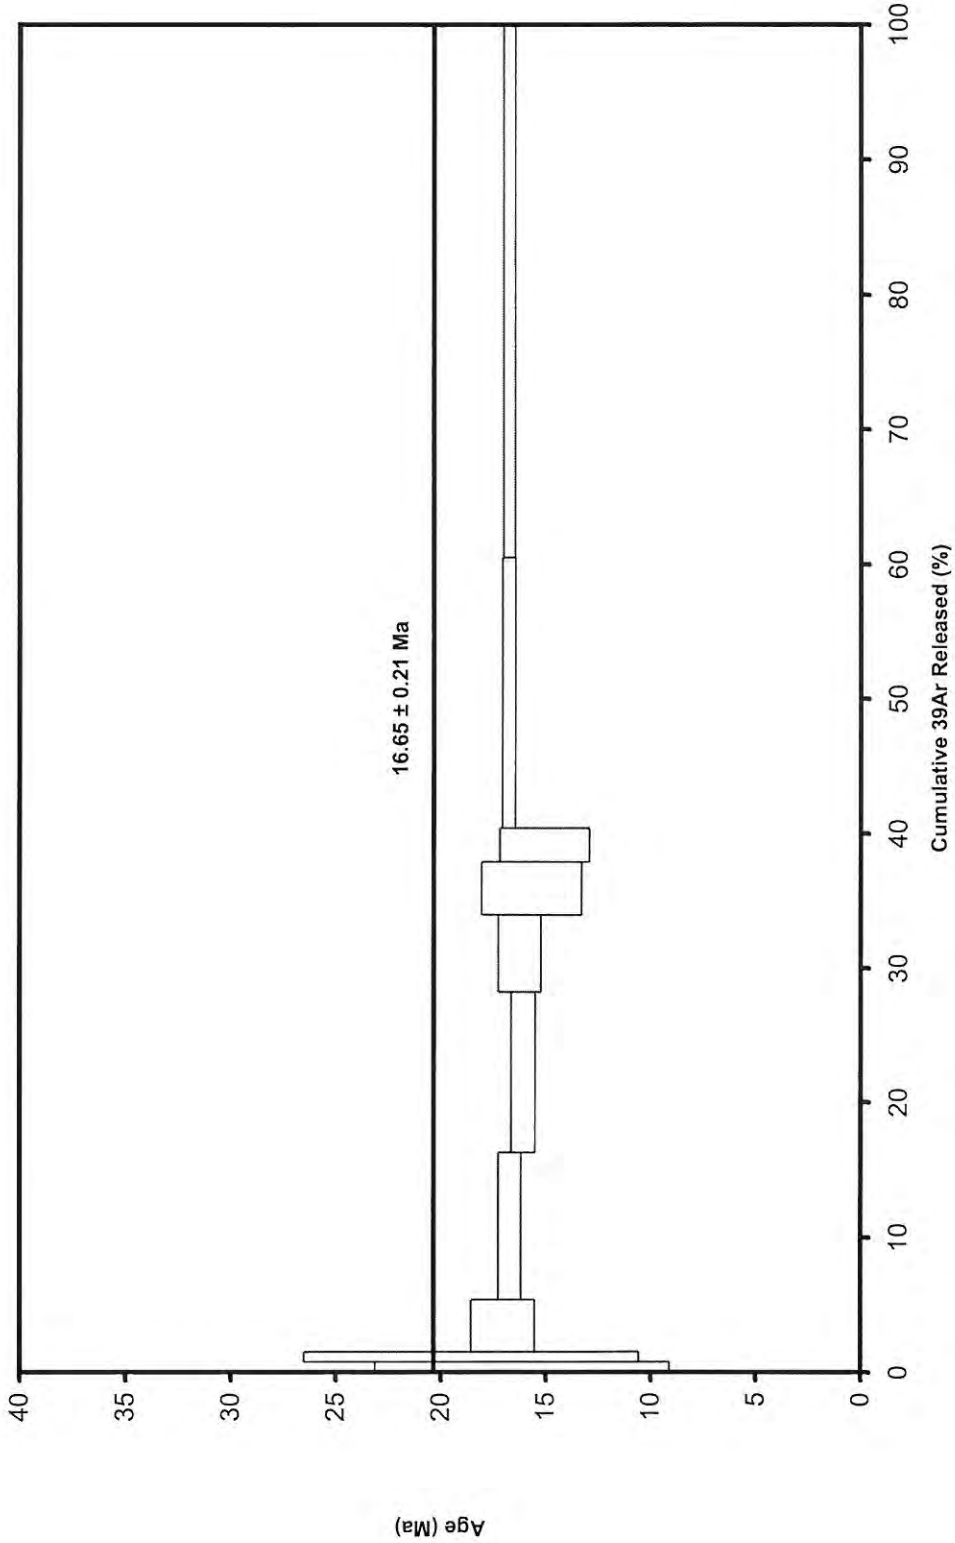

**Ar-Ages in Ma**

WEIGHTED PLATEAU  
 $16.65 \pm 0.21$

TOTAL FUSION  
 $16.57 \pm 0.24$

NORMAL ISOCHRON  
 $16.62 \pm 0.29$

INVERSE ISOCHRON  
 $16.68 \pm 0.24$

MSWD  
1.03

**Sample Info**

plagioclase  
OR  
jh

IRR = OSU4E06  
J =  $0.0015191 \pm$

DR2013250 Camp

07C868.AGE >>> MD06-142 >>> CAMP PROJECT

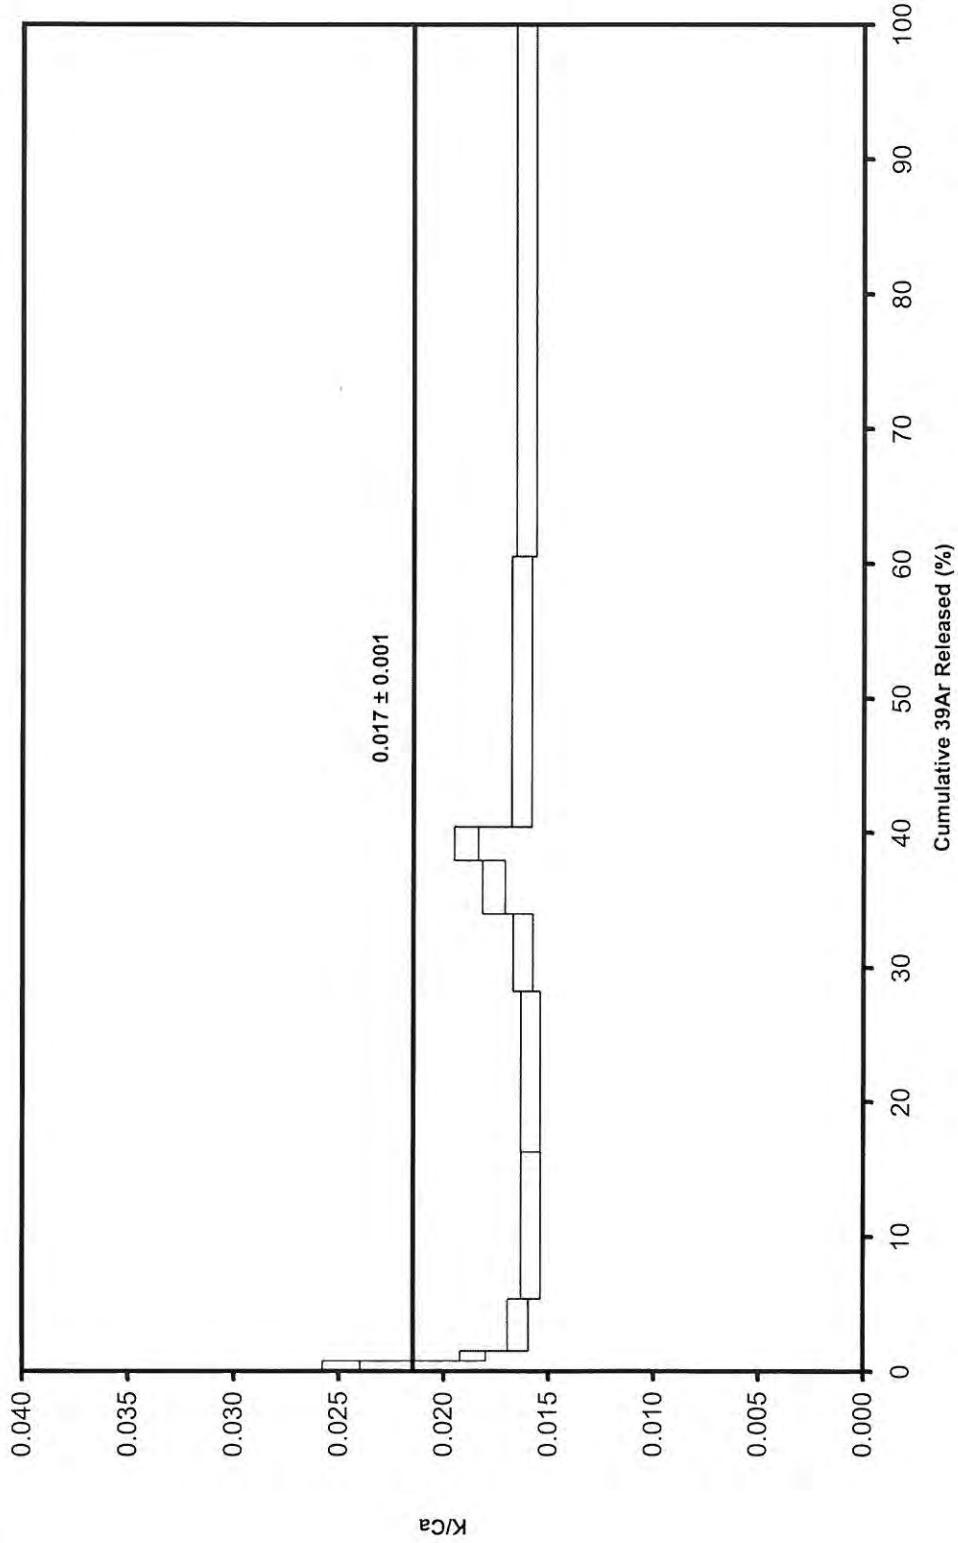

**Ar-Ages in Ma**

WEIGHTED PLATEAU  
16.65 ± 0.21

TOTAL FUSION  
16.57 ± 0.24

NORMAL ISOCHRON  
16.62 ± 0.29

INVERSE ISOCHRON  
16.68 ± 0.24

**Sample Info**

plagioclase  
OR  
jh

IRR = OSU4E06  
J = 0.0015191 ±

DR2013250 Camp

07C868.AGE >>> MD06-142 >>> CAMP PROJECT

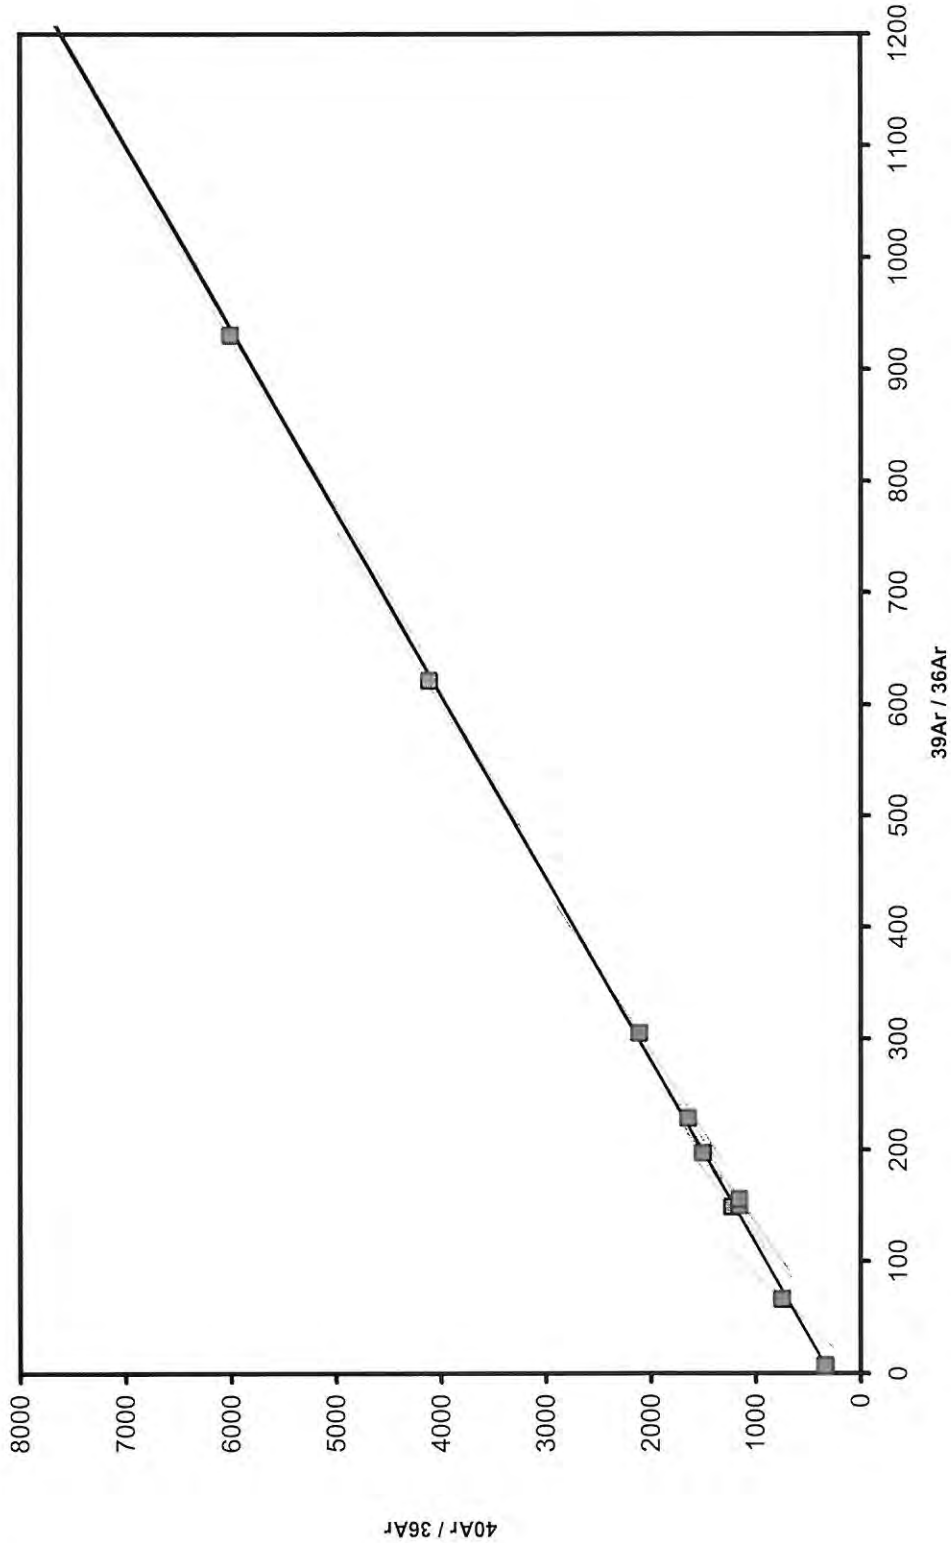

**Ar-Ages in Ma**

WEIGHTED PLATEAU  
16.65 ± 0.21

TOTAL FUSION  
16.57 ± 0.24

NORMAL ISOCHRON  
16.62 ± 0.29

INVERSE ISOCHRON  
16.68 ± 0.24

MSWD  
1.52

**Sample Info**

plagioclase  
OR  
jh

IRR = OSU4E06  
J = 0.0015191 ±

DR2013250 Camp



07C868.AGE >>> MD06-142 >>> CAMP PROJECT

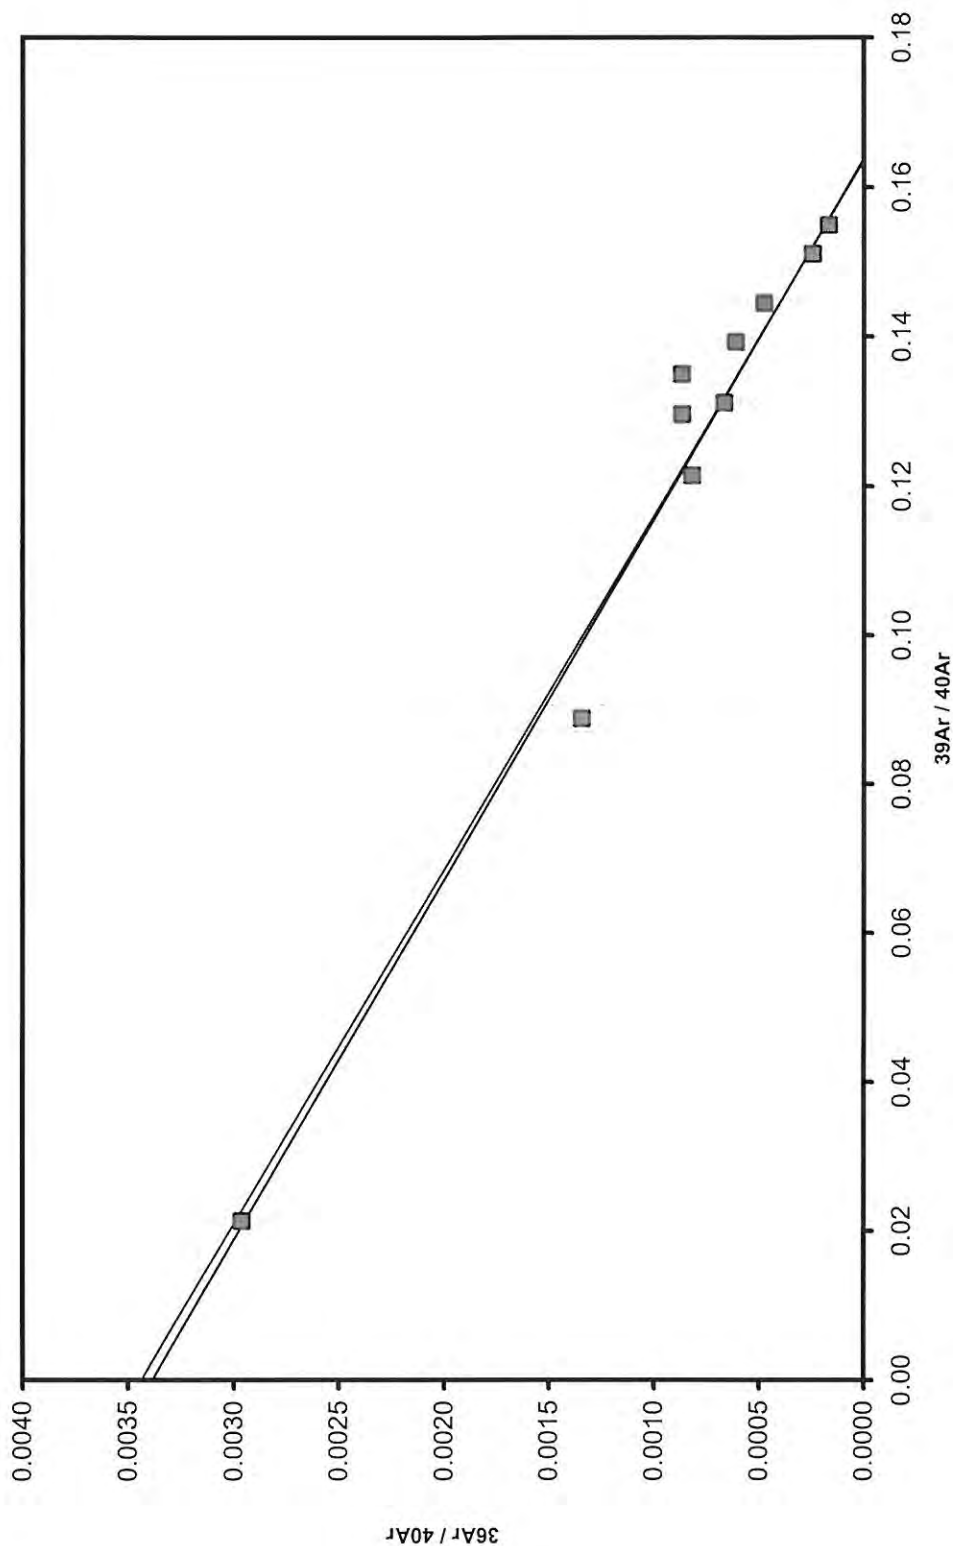

Ar-Ages in Ma

WEIGHTED PLATEAU  
16.65  $\pm$  0.21

TOTAL FUSION  
16.57  $\pm$  0.24

NORMAL ISOCHRON  
16.62  $\pm$  0.29

INVERSE ISOCHRON  
16.68  $\pm$  0.24

MSWD  
1.12

Sample Info

plagioclase  
OR  
jh

IRR = OSU4E06  
J = 0.0015191  $\pm$

DR2013250 Camp

Age Data - Sampl MF94-63

| Procedure |         | 36Ar     | 1σ       | 37Ar     | 1σ       | 38Ar     | 1σ       | 39Ar     | 1σ       | 40Ar     | 1σ       |
|-----------|---------|----------|----------|----------|----------|----------|----------|----------|----------|----------|----------|
| Blanks    |         |          |          |          |          |          |          |          |          |          |          |
| 07C1767   | 400 °C  | 0.000022 | 0.000001 | 0.000019 | 0.000005 | 0.000014 | 0.000002 | 0.000025 | 0.000007 | 0.006982 | 0.000047 |
| 07C1768   | 500 °C  | 0.000032 | 0.000004 | 0.000013 | 0.000015 | 0.000013 | 0.000006 | 0.000031 | 0.000006 | 0.007600 | 0.000611 |
| 07C1769   | 600 °C  | 0.000034 | 0.000004 | 0.000012 | 0.000015 | 0.000013 | 0.000006 | 0.000034 | 0.000006 | 0.007837 | 0.000611 |
| 07C1771   | 700 °C  | 0.000037 | 0.000004 | 0.000014 | 0.000015 | 0.000013 | 0.000006 | 0.000044 | 0.000006 | 0.008228 | 0.000611 |
| 07C1772   | 800 °C  | 0.000038 | 0.000004 | 0.000018 | 0.000015 | 0.000013 | 0.000006 | 0.000049 | 0.000006 | 0.008390 | 0.000611 |
| 07C1773   | 875 °C  | 0.000037 | 0.000004 | 0.000022 | 0.000015 | 0.000012 | 0.000006 | 0.000054 | 0.000006 | 0.008522 | 0.000611 |
| 07C1775   | 950 °C  | 0.000036 | 0.000004 | 0.000037 | 0.000015 | 0.000012 | 0.000006 | 0.000066 | 0.000006 | 0.008728 | 0.000611 |
| 07C1776   | 1025 °C | 0.000035 | 0.000004 | 0.000047 | 0.000015 | 0.000012 | 0.000006 | 0.000071 | 0.000006 | 0.008787 | 0.000611 |
| 07C1777   | 1100 °C | 0.000034 | 0.000004 | 0.000058 | 0.000015 | 0.000012 | 0.000006 | 0.000075 | 0.000006 | 0.008823 | 0.000611 |
| 07C1779   | 1200 °C | 0.000033 | 0.000004 | 0.000084 | 0.000015 | 0.000011 | 0.000006 | 0.000083 | 0.000006 | 0.008822 | 0.000611 |
| 07C1780   | 1300 °C | 0.000032 | 0.000004 | 0.000099 | 0.000015 | 0.000011 | 0.000006 | 0.000086 | 0.000006 | 0.008784 | 0.000611 |
| 07C1782   | 1400 °C | 0.000033 | 0.000004 | 0.000110 | 0.000006 | 0.000012 | 0.000004 | 0.000088 | 0.000005 | 0.009018 | 0.000049 |

These calculations are all relative to the FCT-3 biotite monitor age at 28.0 Ma, and have not yet been recalculated to the new 28.201 Ma mor

| Intercept<br>Values |         | <sup>36</sup> Ar | 1σ       | r2     |              | <sup>37</sup> Ar | 1σ       | r2     |               |
|---------------------|---------|------------------|----------|--------|--------------|------------------|----------|--------|---------------|
| 07C1767             | 400 °C  | 0.000219         | 0.000005 | 0.0916 | LIN # 1      | 0.000222         | 0.000006 | 0.0089 | LIN # 6       |
| 07C1768             | 500 °C  | 0.000179         | 0.000004 | 0.2786 | LIN #        | 0.001288         | 0.000016 | 0.6376 | LIN #         |
| 07C1769             | 600 °C  | 0.000456         | 0.000002 | 0.8437 | LIN #        | 0.009135         | 0.000132 | 0.8789 | EXP # 2 3 4 6 |
| 07C1771             | 700 °C  | 0.000260         | 0.000006 | 0.0011 | LIN # 10     | 0.019542         | 0.000111 | 0.9371 | EXP # 8       |
| 07C1772             | 800 °C  | 0.000345         | 0.000004 | 0.6099 | LIN # 1 2 10 | 0.035641         | 0.000183 | 0.9790 | LIN # 2 3 6   |
| 07C1773             | 875 °C  | 0.000230         | 0.000003 | 0.5972 | LIN # 1      | 0.029982         | 0.000180 | 0.9242 | EXP #         |
| 07C1775             | 950 °C  | 0.000297         | 0.000006 | 0.0657 | LIN #        | 0.039377         | 0.000302 | 0.9552 | LIN # 2 3 6 8 |
| 07C1776             | 1025 °C | 0.000294         | 0.000004 | 0.0384 | LIN #        | 0.041970         | 0.000161 | 0.9657 | EXP # 8       |
| 07C1777             | 1100 °C | 0.000384         | 0.000007 | 0.0317 | LIN #        | 0.041227         | 0.000115 | 0.9873 | EXP # 2 4 5   |
| 07C1779             | 1200 °C | 0.000391         | 0.000006 | 0.4847 | LIN #        | 0.058003         | 0.000220 | 0.9670 | EXP #         |
| 07C1780             | 1300 °C | 0.000253         | 0.000004 | 0.5367 | LIN # 9      | 0.036421         | 0.000184 | 0.9447 | LIN #         |
| 07C1782             | 1400 °C | 0.000165         | 0.000006 | 0.0203 | LIN #        | 0.017910         | 0.000088 | 0.9546 | LIN # 1       |

nitor age of Kuiper et al.(2008).

| 38Ar     | 1 $\sigma$ | r2     |             | 39Ar     | 1 $\sigma$ | r2     |                    |
|----------|------------|--------|-------------|----------|------------|--------|--------------------|
| 0.000044 | 0.000004   | 0.6136 | LIN # 3 5   | 0.000221 | 0.000008   | 0.9935 | LIN #              |
| 0.000051 | 0.000005   | 0.0238 | LIN #       | 0.000816 | 0.000008   | 0.9939 | LIN #              |
| 0.000142 | 0.000006   | 0.0206 | LIN #       | 0.004454 | 0.000026   | 0.8977 | LIN #              |
| 0.000168 | 0.000005   | 0.6923 | LIN # 1 9   | 0.009133 | 0.000018   | 0.5486 | LIN # 3 9          |
| 0.000237 | 0.000003   | 0.8121 | LIN # 3 6   | 0.016390 | 0.000061   | 0.9590 | LIN # 1 2 3 4 5 10 |
| 0.000190 | 0.000006   | 0.4845 | LIN # 4     | 0.013643 | 0.000035   | 0.8020 | LIN # 1            |
| 0.000264 | 0.000006   | 0.0815 | LIN # 2 9   | 0.017873 | 0.000020   | 0.9871 | LIN # 1 4 7        |
| 0.000263 | 0.000009   | 0.0543 | LIN #       | 0.018844 | 0.000017   | 0.9876 | LIN # 1 5          |
| 0.000299 | 0.000004   | 0.7108 | LIN # 5 6 7 | 0.018607 | 0.000035   | 0.9471 | EXP # 2 6 9        |
| 0.000362 | 0.000005   | 0.0000 | LIN #       | 0.025652 | 0.000042   | 0.9739 | EXP # 1 6          |
| 0.000228 | 0.000006   | 0.1139 | LIN #       | 0.016339 | 0.000049   | 0.9184 | LIN # 1 2 3 7      |
| 0.000122 | 0.000006   | 0.0297 | LIN #       | 0.008195 | 0.000032   | 0.5467 | LIN # 1 7          |

| 40Ar     | 1σ       | r2     |                  | Sample<br>Parameters |         | Sample | Material    |
|----------|----------|--------|------------------|----------------------|---------|--------|-------------|
| 0.065992 | 0.000032 | 0.9613 | LIN # 1 5 6 8 10 | 07C1767              | 400 °C  | MF9463 | plagioclase |
| 0.055605 | 0.000110 | 0.9390 | LIN # 1 9        | 07C1768              | 500 °C  | MF9463 | plagioclase |
| 0.148620 | 0.000254 | 0.9291 | LIN # 4          | 07C1769              | 600 °C  | MF9463 | plagioclase |
| 0.110244 | 0.000092 | 0.9845 | LIN # 1 2 6 8    | 07C1771              | 700 °C  | MF9463 | plagioclase |
| 0.166650 | 0.000076 | 0.9944 | LIN # 6          | 07C1772              | 800 °C  | MF9463 | plagioclase |
| 0.120937 | 0.000203 | 0.8823 | LIN # 1 2        | 07C1773              | 875 °C  | MF9463 | plagioclase |
| 0.157100 | 0.000135 | 0.9877 | LIN # 1 4 5 7    | 07C1775              | 950 °C  | MF9463 | plagioclase |
| 0.157501 | 0.000233 | 0.9712 | LIN # 1 2 3 6    | 07C1776              | 1025 °C | MF9463 | plagioclase |
| 0.184830 | 0.000141 | 0.9875 | LIN # 1 7        | 07C1777              | 1100 °C | MF9463 | plagioclase |
| 0.209549 | 0.000165 | 0.9936 | LIN # 1 3 8 9    | 07C1779              | 1200 °C | MF9463 | plagioclase |
| 0.138127 | 0.000117 | 0.9754 | LIN # 1 2 3      | 07C1780              | 1300 °C | MF9463 | plagioclase |
| 0.079693 | 0.000028 | 0.9399 | LIN # 3 4 5 7    | 07C1782              | 1400 °C | MF9463 | plagioclase |

| Location | Analyst | Temp | Standard<br>(in Ma) | %1 $\sigma$ | J         | %1 $\sigma$ |
|----------|---------|------|---------------------|-------------|-----------|-------------|
| Steens   | jh      | 400  | 28.03               | 0.01        | 0.0014714 | 0.42        |
| Steens   | jh      | 500  | 28.03               | 0.01        | 0.0014714 | 0.42        |
| Steens   | jh      | 600  | 28.03               | 0.01        | 0.0014714 | 0.42        |
| Steens   | jh      | 700  | 28.03               | 0.01        | 0.0014714 | 0.42        |
| Steens   | jh      | 800  | 28.03               | 0.01        | 0.0014714 | 0.42        |
| Steens   | jh      | 875  | 28.03               | 0.01        | 0.0014714 | 0.42        |
| Steens   | jh      | 950  | 28.03               | 0.01        | 0.0014714 | 0.42        |
| Steens   | jh      | 1025 | 28.03               | 0.01        | 0.0014714 | 0.42        |
| Steens   | jh      | 1100 | 28.03               | 0.01        | 0.0014714 | 0.42        |
| Steens   | jh      | 1200 | 28.03               | 0.01        | 0.0014714 | 0.42        |
| Steens   | jh      | 1300 | 28.03               | 0.01        | 0.0014714 | 0.42        |
| Steens   | jh      | 1400 | 28.03               | 0.01        | 0.0014714 | 0.42        |

| MDF     | %1 $\sigma$ | Volume Ratio | Sensitivity (mol/vol) | Day | Month | Year | Hour | Min | Resist | Irradiation | Project | Standard Name | Irradiation Constants |
|---------|-------------|--------------|-----------------------|-----|-------|------|------|-----|--------|-------------|---------|---------------|-----------------------|
| 1.00378 | 0.16        | 1.0149       | 1.012E-19             | 27  | 04    | 2007 | 09   | 03  | 001    | OSU4E06     | HLP     | FCT-3         | 07C1767               |
| 1.00378 | 0.16        | 1.015        | 1.012E-19             | 27  | 04    | 2007 | 09   | 28  | 001    | OSU4E06     | HLP     | FCT-3         | 07C1768               |
| 1.00378 | 0.16        | 1.0148       | 1.012E-19             | 27  | 04    | 2007 | 09   | 53  | 001    | OSU4E06     | HLP     | FCT-3         | 07C1769               |
| 1.00378 | 0.16        | 1.0153       | 1.012E-19             | 27  | 04    | 2007 | 10   | 42  | 001    | OSU4E06     | HLP     | FCT-3         | 07C1771               |
| 1.00378 | 0.16        | 1.0156       | 1.012E-19             | 27  | 04    | 2007 | 11   | 07  | 001    | OSU4E06     | HLP     | FCT-3         | 07C1772               |
| 1.00378 | 0.16        | 1.0157       | 1.012E-19             | 27  | 04    | 2007 | 11   | 31  | 001    | OSU4E06     | HLP     | FCT-3         | 07C1773               |
| 1.00378 | 0.16        | 1.0158       | 1.012E-19             | 27  | 04    | 2007 | 12   | 23  | 001    | OSU4E06     | HLP     | FCT-3         | 07C1775               |
| 1.00378 | 0.16        | 1.0157       | 1.012E-19             | 27  | 04    | 2007 | 12   | 47  | 001    | OSU4E06     | HLP     | FCT-3         | 07C1776               |
| 1.00378 | 0.16        | 1.0157       | 1.012E-19             | 27  | 04    | 2007 | 13   | 12  | 001    | OSU4E06     | HLP     | FCT-3         | 07C1777               |
| 1.00378 | 0.16        | 1.0158       | 1.012E-19             | 27  | 04    | 2007 | 14   | 01  | 001    | OSU4E06     | HLP     | FCT-3         | 07C1779               |
| 1.00378 | 0.16        | 1.0157       | 1.012E-19             | 27  | 04    | 2007 | 14   | 26  | 001    | OSU4E06     | HLP     | FCT-3         | 07C1780               |
| 1.00378 | 0.16        | 1.0156       | 1.012E-19             | 27  | 04    | 2007 | 15   | 15  | 001    | OSU4E06     | HLP     | FCT-3         | 07C1782               |

|         | 40/36(a) | %1σ | 40/36(c) | %1σ | 38/36(a) | %1σ | 38/36(c) | %1σ | 39/37(ca) | %1σ | 38/37(ca) | %1σ | 36/37(ca) | %1σ |
|---------|----------|-----|----------|-----|----------|-----|----------|-----|-----------|-----|-----------|-----|-----------|-----|
| 400 °C  | 295.5    | 0   | 0.018    | 35  | 0.1869   | 0   | 1.493    | 3   | 0.000673  | 0   | 0.000139  | 0   | 0.000264  | 0   |
| 500 °C  | 295.5    | 0   | 0.018    | 35  | 0.1869   | 0   | 1.493    | 3   | 0.000673  | 0   | 0.000139  | 0   | 0.000264  | 0   |
| 600 °C  | 295.5    | 0   | 0.018    | 35  | 0.1869   | 0   | 1.493    | 3   | 0.000673  | 0   | 0.000139  | 0   | 0.000264  | 0   |
| 700 °C  | 295.5    | 0   | 0.018    | 35  | 0.1869   | 0   | 1.493    | 3   | 0.000673  | 0   | 0.000139  | 0   | 0.000264  | 0   |
| 800 °C  | 295.5    | 0   | 0.018    | 35  | 0.1869   | 0   | 1.493    | 3   | 0.000673  | 0   | 0.000139  | 0   | 0.000264  | 0   |
| 875 °C  | 295.5    | 0   | 0.018    | 35  | 0.1869   | 0   | 1.493    | 3   | 0.000673  | 0   | 0.000139  | 0   | 0.000264  | 0   |
| 950 °C  | 295.5    | 0   | 0.018    | 35  | 0.1869   | 0   | 1.493    | 3   | 0.000673  | 0   | 0.000139  | 0   | 0.000264  | 0   |
| 1025 °C | 295.5    | 0   | 0.018    | 35  | 0.1869   | 0   | 1.493    | 3   | 0.000673  | 0   | 0.000139  | 0   | 0.000264  | 0   |
| 1100 °C | 295.5    | 0   | 0.018    | 35  | 0.1869   | 0   | 1.493    | 3   | 0.000673  | 0   | 0.000139  | 0   | 0.000264  | 0   |
| 1200 °C | 295.5    | 0   | 0.018    | 35  | 0.1869   | 0   | 1.493    | 3   | 0.000673  | 0   | 0.000139  | 0   | 0.000264  | 0   |
| 1300 °C | 295.5    | 0   | 0.018    | 35  | 0.1869   | 0   | 1.493    | 3   | 0.000673  | 0   | 0.000139  | 0   | 0.000264  | 0   |
| 1400 °C | 295.5    | 0   | 0.018    | 35  | 0.1869   | 0   | 1.493    | 3   | 0.000673  | 0   | 0.000139  | 0   | 0.000264  | 0   |



| 40/39(k) | %1σ | 38/39(k) | %1σ | 36/38(cl) | %1σ | K/Ca | %1σ | K/Cl | %1σ | Ca/Cl | %1σ | Incremental Heating |
|----------|-----|----------|-----|-----------|-----|------|-----|------|-----|-------|-----|---------------------|
| 0.00101  | 0   | 0.01138  | 0   | 0         | 0   | 0.43 | 0   | 0    | 0   | 0     | 0   | 07C1767 400 °C ✓    |
| 0.00101  | 0   | 0.01138  | 0   | 0         | 0   | 0.43 | 0   | 0    | 0   | 0     | 0   | 07C1768 500 °C ✓    |
| 0.00101  | 0   | 0.01138  | 0   | 0         | 0   | 0.43 | 0   | 0    | 0   | 0     | 0   | 07C1769 600 °C ✓    |
| 0.00101  | 0   | 0.01138  | 0   | 0         | 0   | 0.43 | 0   | 0    | 0   | 0     | 0   | 07C1771 700 °C ✓    |
| 0.00101  | 0   | 0.01138  | 0   | 0         | 0   | 0.43 | 0   | 0    | 0   | 0     | 0   | 07C1772 800 °C ✓    |
| 0.00101  | 0   | 0.01138  | 0   | 0         | 0   | 0.43 | 0   | 0    | 0   | 0     | 0   | 07C1773 875 °C ✓    |
| 0.00101  | 0   | 0.01138  | 0   | 0         | 0   | 0.43 | 0   | 0    | 0   | 0     | 0   | 07C1775 950 °C ✓    |
| 0.00101  | 0   | 0.01138  | 0   | 0         | 0   | 0.43 | 0   | 0    | 0   | 0     | 0   | 07C1776 1025 °C ✓   |
| 0.00101  | 0   | 0.01138  | 0   | 0         | 0   | 0.43 | 0   | 0    | 0   | 0     | 0   | 07C1777 1100 °C ✓   |
| 0.00101  | 0   | 0.01138  | 0   | 0         | 0   | 0.43 | 0   | 0    | 0   | 0     | 0   | 07C1779 1200 °C ✓   |
| 0.00101  | 0   | 0.01138  | 0   | 0         | 0   | 0.43 | 0   | 0    | 0   | 0     | 0   | 07C1780 1300 °C ✓   |
| 0.00101  | 0   | 0.01138  | 0   | 0         | 0   | 0.43 | 0   | 0    | 0   | 0     | 0   | 07C1782 1400 °C ✓   |

Σ

#### Information on Analysis

MF9463  
plagioclase  
Steens  
jh

Project = HLP  
Irradiation = OSU4E06  
J = 0.0014714 ± 0.0000062  
FCT-3 = 28.030 ± 0.003 Ma

| 36Ar(a)  | 37Ar(ca) | 38Ar(cl) | 39Ar(k)  | 40Ar(r)  | Age $\pm 2\sigma$<br>(Ma) | 40Ar(r)<br>(%) | 39Ar(k)<br>(%) | K/Ca $\pm 2\sigma$ | Normal<br>Isochron |         |
|----------|----------|----------|----------|----------|---------------------------|----------------|----------------|--------------------|--------------------|---------|
| 0.000197 | 0.002496 | 0.000000 | 0.000197 | 0.001884 | 25.27 $\pm$ 41.09         | 3.14           | 0.13           | 0.034 $\pm$ 0.005  | 07C1767            | 400 °C  |
| 0.000144 | 0.015677 | 0.000000 | 0.000785 | 0.006425 | 21.59 $\pm$ 11.52         | 13.16          | 0.53           | 0.022 $\pm$ 0.001  | 07C1768            | 500 °C  |
| 0.000393 | 0.112185 | 0.000000 | 0.004397 | 0.026907 | 16.17 $\pm$ 1.94          | 18.82          | 2.96           | 0.017 $\pm$ 0.001  | 07C1769            | 600 °C  |
| 0.000160 | 0.240412 | 0.000000 | 0.009041 | 0.056508 | 16.52 $\pm$ 1.25          | 54.49          | 6.08           | 0.016 $\pm$ 0.001  | 07C1771            | 700 °C  |
| 0.000193 | 0.438856 | 0.000000 | 0.016253 | 0.103889 | 16.89 $\pm$ 0.69          | 64.58          | 10.94          | 0.016 $\pm$ 0.001  | 07C1772            | 800 °C  |
| 0.000096 | 0.369239 | 0.000000 | 0.013515 | 0.085882 | 16.79 $\pm$ 0.69          | 75.13          | 9.09           | 0.016 $\pm$ 0.001  | 07C1773            | 875 °C  |
| 0.000133 | 0.485238 | 0.000000 | 0.017711 | 0.111415 | 16.62 $\pm$ 0.75          | 73.86          | 11.92          | 0.016 $\pm$ 0.001  | 07C1775            | 950 °C  |
| 0.000123 | 0.517235 | 0.000000 | 0.018666 | 0.114823 | 16.26 $\pm$ 0.59          | 75.95          | 12.56          | 0.016 $\pm$ 0.001  | 07C1776            | 1025 °C |
| 0.000217 | 0.508110 | 0.000000 | 0.018428 | 0.114751 | 16.45 $\pm$ 0.76          | 64.14          | 12.40          | 0.016 $\pm$ 0.001  | 07C1777            | 1100 °C |
| 0.000170 | 0.715387 | 0.000000 | 0.025418 | 0.153750 | 15.99 $\pm$ 0.55          | 75.35          | 17.10          | 0.015 $\pm$ 0.001  | 07C1779            | 1200 °C |
| 0.000103 | 0.448745 | 0.000000 | 0.016160 | 0.101040 | 16.52 $\pm$ 0.69          | 76.83          | 10.87          | 0.015 $\pm$ 0.001  | 07C1780            | 1300 °C |
| 0.000075 | 0.220048 | 0.000000 | 0.008064 | 0.049887 | 16.35 $\pm$ 1.44          | 69.37          | 5.43           | 0.016 $\pm$ 0.001  | 07C1782            | 1400 °C |
| 0.002003 | 4.073627 | 0.000000 | 0.148635 | 0.927161 |                           |                |                |                    |                    |         |

| Results          | 40(r)/39(k) $\pm 2\sigma$          | Age $\pm 2\sigma$<br>(Ma)                                                                   | MSWD                   | 39Ar(k)<br>(%,n)                                           | K/Ca $\pm 2\sigma$ | Results    |
|------------------|------------------------------------|---------------------------------------------------------------------------------------------|------------------------|------------------------------------------------------------|--------------------|------------|
| Weighted Plateau | 6.2256 $\pm$ 0.0912<br>$\pm$ 1.46% | 16.45 $\pm$ 0.28<br>$\pm$ 1.68%<br>External Error $\pm$ 0.38<br>Analytical Error $\pm$ 0.24 | 0.65<br>2.20<br>1.0000 | 100.00<br>12<br>Statistical T Ratio<br>Error Magnification | 0.016 $\pm$ 0.001  | Isochron   |
| Total Fusion Age | 6.2378 $\pm$ 0.0993<br>$\pm$ 1.59% | 16.48 $\pm$ 0.30<br>$\pm$ 1.79%<br>External Error $\pm$ 0.39<br>Analytical Error $\pm$ 0.26 |                        | 12                                                         | 0.000 $\pm$ 0.000  | Statistics |

| 39(k)/36(a) ± 2σ |              | 40(a+r)/36(a) ± 2σ |                | r.i.   | Inverse Isochron |         | 39(k)/40(a+r) ± 2σ |                     |
|------------------|--------------|--------------------|----------------|--------|------------------|---------|--------------------|---------------------|
| ✓                | 1.0 ± 0.1    |                    | 305.1 ± 16.2   | 0.4345 | 07C1767          | 400 °C  | ✓                  | 0.003276 ± 0.000359 |
| ✓                | 5.5 ± 0.4    |                    | 340.3 ± 27.2   | 0.8984 | 07C1768          | 500 °C  | ✓                  | 0.016076 ± 0.000579 |
| ✓                | 11.2 ± 0.3   |                    | 364.0 ± 9.8    | 0.8404 | 07C1769          | 600 °C  | ✓                  | 0.030753 ± 0.000480 |
| ✓                | 56.6 ± 4.9   |                    | 649.4 ± 57.0   | 0.9888 | 07C1771          | 700 °C  | ✓                  | 0.087189 ± 0.001140 |
| ✓                | 84.3 ± 5.9   |                    | 834.5 ± 58.6   | 0.9870 | 07C1772          | 800 °C  | ✓                  | 0.101051 ± 0.001147 |
| ✓                | 140.5 ± 16.0 |                    | 1188.5 ± 135.9 | 0.9936 | 07C1773          | 875 °C  | ✓                  | 0.118240 ± 0.001528 |
| ✓                | 132.8 ± 16.3 |                    | 1130.7 ± 139.4 | 0.9972 | 07C1775          | 950 °C  | ✓                  | 0.117422 ± 0.001092 |
| ✓                | 151.8 ± 16.6 |                    | 1229.1 ± 134.5 | 0.9962 | 07C1776          | 1025 °C | ✓                  | 0.123479 ± 0.001176 |
| ✓                | 84.9 ± 6.8   |                    | 824.2 ± 66.3   | 0.9941 | 07C1777          | 1100 °C | ✓                  | 0.103012 ± 0.000900 |
| ✓                | 149.4 ± 15.3 |                    | 1199.4 ± 123.2 | 0.9971 | 07C1779          | 1200 °C | ✓                  | 0.124590 ± 0.000980 |
| ✓                | 156.8 ± 20.4 |                    | 1275.9 ± 166.2 | 0.9959 | 07C1780          | 1300 °C | ✓                  | 0.122897 ± 0.001456 |
| ✓                | 108.2 ± 21.6 |                    | 964.9 ± 192.1  | 0.9990 | 07C1782          | 1400 °C | ✓                  | 0.112135 ± 0.001007 |

| 40(a)/36(a) ± 2σ          |  | 40(r)/39(k) ± 2σ        |  | Age ± 2σ (Ma)           | MSWD | Results  | 40(a)/36(a) ± 2σ          |  |
|---------------------------|--|-------------------------|--|-------------------------|------|----------|---------------------------|--|
| 297.5164 ± 7.4033 ± 2.49% |  | 6.1912 ± 0.1164 ± 1.88% |  | 16.36 ± 0.34 ± 2.05%    | 0.70 | Isochron | 297.4371 ± 7.4258 ± 2.50% |  |
|                           |  |                         |  | External Error ± 0.42   |      |          |                           |  |
|                           |  |                         |  | Analytical Error ± 0.31 |      |          |                           |  |
|                           |  |                         |  |                         |      |          |                           |  |
|                           |  |                         |  |                         |      |          |                           |  |
|                           |  |                         |  |                         |      |          |                           |  |
|                           |  |                         |  |                         |      |          |                           |  |
|                           |  |                         |  |                         |      |          |                           |  |
|                           |  |                         |  |                         |      |          |                           |  |
|                           |  |                         |  |                         |      |          |                           |  |
|                           |  |                         |  |                         |      |          |                           |  |
|                           |  |                         |  |                         |      |          |                           |  |
|                           |  |                         |  |                         |      |          |                           |  |
|                           |  |                         |  |                         |      |          |                           |  |
|                           |  |                         |  |                         |      |          |                           |  |
|                           |  |                         |  |                         |      |          |                           |  |
|                           |  |                         |  |                         |      |          |                           |  |
|                           |  |                         |  |                         |      |          |                           |  |
|                           |  |                         |  |                         |      |          |                           |  |
|                           |  |                         |  |                         |      |          |                           |  |
|                           |  |                         |  |                         |      |          |                           |  |
|                           |  |                         |  |                         |      |          |                           |  |
|                           |  |                         |  |                         |      |          |                           |  |
|                           |  |                         |  |                         |      |          |                           |  |
|                           |  |                         |  |                         |      |          |                           |  |
|                           |  |                         |  |                         |      |          |                           |  |
|                           |  |                         |  |                         |      |          |                           |  |
|                           |  |                         |  |                         |      |          |                           |  |
|                           |  |                         |  |                         |      |          |                           |  |
|                           |  |                         |  |                         |      |          |                           |  |
|                           |  |                         |  |                         |      |          |                           |  |
|                           |  |                         |  |                         |      |          |                           |  |
|                           |  |                         |  |                         |      |          |                           |  |
|                           |  |                         |  |                         |      |          |                           |  |
|                           |  |                         |  |                         |      |          |                           |  |
|                           |  |                         |  |                         |      |          |                           |  |
|                           |  |                         |  |                         |      |          |                           |  |
|                           |  |                         |  |                         |      |          |                           |  |
|                           |  |                         |  |                         |      |          |                           |  |
|                           |  |                         |  |                         |      |          |                           |  |
|                           |  |                         |  |                         |      |          |                           |  |
|                           |  |                         |  |                         |      |          |                           |  |
|                           |  |                         |  |                         |      |          |                           |  |
|                           |  |                         |  |                         |      |          |                           |  |
|                           |  |                         |  |                         |      |          |                           |  |
|                           |  |                         |  |                         |      |          |                           |  |
|                           |  |                         |  |                         |      |          |                           |  |
|                           |  |                         |  |                         |      |          |                           |  |
|                           |  |                         |  |                         |      |          |                           |  |
|                           |  |                         |  |                         |      |          |                           |  |
|                           |  |                         |  |                         |      |          |                           |  |
|                           |  |                         |  |                         |      |          |                           |  |
|                           |  |                         |  |                         |      |          |                           |  |
|                           |  |                         |  |                         |      |          |                           |  |
|                           |  |                         |  |                         |      |          |                           |  |
|                           |  |                         |  |                         |      |          |                           |  |
|                           |  |                         |  |                         |      |          |                           |  |
|                           |  |                         |  |                         |      |          |                           |  |
|                           |  |                         |  |                         |      |          |                           |  |
|                           |  |                         |  |                         |      |          |                           |  |
|                           |  |                         |  |                         |      |          |                           |  |
|                           |  |                         |  |                         |      |          |                           |  |
|                           |  |                         |  |                         |      |          |                           |  |
|                           |  |                         |  |                         |      |          |                           |  |
|                           |  |                         |  |                         |      |          |                           |  |
|                           |  |                         |  |                         |      |          |                           |  |
|                           |  |                         |  |                         |      |          |                           |  |
|                           |  |                         |  |                         |      |          |                           |  |
|                           |  |                         |  |                         |      |          |                           |  |
|                           |  |                         |  |                         |      |          |                           |  |
|                           |  |                         |  |                         |      |          |                           |  |
|                           |  |                         |  |                         |      |          |                           |  |
|                           |  |                         |  |                         |      |          |                           |  |
|                           |  |                         |  |                         |      |          |                           |  |
|                           |  |                         |  |                         |      |          |                           |  |
|                           |  |                         |  |                         |      |          |                           |  |
|                           |  |                         |  |                         |      |          |                           |  |
|                           |  |                         |  |                         |      |          |                           |  |
|                           |  |                         |  |                         |      |          |                           |  |
|                           |  |                         |  |                         |      |          |                           |  |
|                           |  |                         |  |                         |      |          |                           |  |
|                           |  |                         |  |                         |      |          |                           |  |
|                           |  |                         |  |                         |      |          |                           |  |
|                           |  |                         |  |                         |      |          |                           |  |
|                           |  |                         |  |                         |      |          |                           |  |
|                           |  |                         |  |                         |      |          |                           |  |
|                           |  |                         |  |                         |      |          |                           |  |
|                           |  |                         |  |                         |      |          |                           |  |
|                           |  |                         |  |                         |      |          |                           |  |
|                           |  |                         |  |                         |      |          |                           |  |
|                           |  |                         |  |                         |      |          |                           |  |
|                           |  |                         |  |                         |      |          |                           |  |
|                           |  |                         |  |                         |      |          |                           |  |
|                           |  |                         |  |                         |      |          |                           |  |
|                           |  |                         |  |                         |      |          |                           |  |
|                           |  |                         |  |                         |      |          |                           |  |
|                           |  |                         |  |                         |      |          |                           |  |
|                           |  |                         |  |                         |      |          |                           |  |
|                           |  |                         |  |                         |      |          |                           |  |
|                           |  |                         |  |                         |      |          |                           |  |
|                           |  |                         |  |                         |      |          |                           |  |
|                           |  |                         |  |                         |      |          |                           |  |
|                           |  |                         |  |                         |      |          |                           |  |
|                           |  |                         |  |                         |      |          |                           |  |
|                           |  |                         |  |                         |      |          |                           |  |
|                           |  |                         |  |                         |      |          |                           |  |
|                           |  |                         |  |                         |      |          |                           |  |
|                           |  |                         |  |                         |      |          |                           |  |
|                           |  |                         |  |                         |      |          |                           |  |
|                           |  |                         |  |                         |      |          |                           |  |
|                           |  |                         |  |                         |      |          |                           |  |
|                           |  |                         |  |                         |      |          |                           |  |
|                           |  |                         |  |                         |      |          |                           |  |

| 36(a)/40(a+r) ± 2σ  | r.i.   | Degassing<br>Patterns |           | 36Ar(a)  | 36Ar(c)  | 36Ar(ca) | 36Ar(cl) |
|---------------------|--------|-----------------------|-----------|----------|----------|----------|----------|
| 0.003278 ± 0.000174 | 0.0006 | 07C1767               | 400 °C ✓  | 0.000197 | 0.000000 | 0.000001 | 0.000000 |
| 0.002939 ± 0.000235 | 0.2249 | 07C1768               | 500 °C ✓  | 0.000144 | 0.000000 | 0.000004 | 0.000000 |
| 0.002747 ± 0.000074 | 0.2051 | 07C1769               | 600 °C ✓  | 0.000393 | 0.000000 | 0.000030 | 0.000000 |
| 0.001540 ± 0.000135 | 0.1239 | 07C1771               | 700 °C ✓  | 0.000160 | 0.000000 | 0.000063 | 0.000000 |
| 0.001198 ± 0.000084 | 0.0736 | 07C1772               | 800 °C ✓  | 0.000193 | 0.000000 | 0.000116 | 0.000000 |
| 0.000841 ± 0.000096 | 0.0863 | 07C1773               | 875 °C ✓  | 0.000096 | 0.000000 | 0.000097 | 0.000000 |
| 0.000884 ± 0.000109 | 0.0602 | 07C1775               | 950 °C ✓  | 0.000133 | 0.000000 | 0.000128 | 0.000000 |
| 0.000814 ± 0.000089 | 0.0722 | 07C1776               | 1025 °C ✓ | 0.000123 | 0.000000 | 0.000137 | 0.000000 |
| 0.001213 ± 0.000098 | 0.0701 | 07C1777               | 1100 °C ✓ | 0.000217 | 0.000000 | 0.000134 | 0.000000 |
| 0.000834 ± 0.000086 | 0.0478 | 07C1779               | 1200 °C ✓ | 0.000170 | 0.000000 | 0.000189 | 0.000000 |
| 0.000784 ± 0.000102 | 0.0582 | 07C1780               | 1300 °C ✓ | 0.000103 | 0.000000 | 0.000118 | 0.000000 |
| 0.001036 ± 0.000206 | 0.0014 | 07C1782               | 1400 °C ✓ | 0.000075 | 0.000000 | 0.000058 | 0.000000 |
| Σ                   |        |                       |           | 0.002003 | 0.000000 | 0.001075 | 0.000000 |
| Σ                   |        |                       |           |          |          |          | 0.003072 |

| 37Ar(ca) | 38Ar(a)  | 38Ar(c)  | 38Ar(k)  | 38Ar(ca) | 38Ar(cl) | 39Ar(k)  | 39Ar(ca) | 40Ar(r)  | 40Ar(a)  | 40Ar(c)  |
|----------|----------|----------|----------|----------|----------|----------|----------|----------|----------|----------|
| 0.002496 | 0.000037 | 0.000000 | 0.000002 | 0.000000 | 0.000000 | 0.000197 | 0.000002 | 0.001884 | 0.058109 | 0.000000 |
| 0.015677 | 0.000027 | 0.000000 | 0.000009 | 0.000002 | 0.000000 | 0.000785 | 0.000011 | 0.006425 | 0.042414 | 0.000000 |
| 0.112185 | 0.000073 | 0.000000 | 0.000050 | 0.000016 | 0.000000 | 0.004397 | 0.000076 | 0.026907 | 0.116071 | 0.000000 |
| 0.240412 | 0.000030 | 0.000000 | 0.000103 | 0.000033 | 0.000000 | 0.009041 | 0.000162 | 0.056508 | 0.047186 | 0.000000 |
| 0.438856 | 0.000036 | 0.000000 | 0.000185 | 0.000061 | 0.000000 | 0.016253 | 0.000295 | 0.103889 | 0.056955 | 0.000000 |
| 0.369239 | 0.000018 | 0.000000 | 0.000154 | 0.000051 | 0.000000 | 0.013515 | 0.000248 | 0.085882 | 0.028418 | 0.000000 |
| 0.485238 | 0.000025 | 0.000000 | 0.000202 | 0.000067 | 0.000000 | 0.017711 | 0.000327 | 0.111415 | 0.039421 | 0.000000 |
| 0.517235 | 0.000023 | 0.000000 | 0.000212 | 0.000072 | 0.000000 | 0.018666 | 0.000348 | 0.114823 | 0.036345 | 0.000000 |
| 0.508110 | 0.000041 | 0.000000 | 0.000210 | 0.000071 | 0.000000 | 0.018428 | 0.000342 | 0.114751 | 0.064139 | 0.000000 |
| 0.715387 | 0.000032 | 0.000000 | 0.000289 | 0.000099 | 0.000000 | 0.025418 | 0.000481 | 0.153750 | 0.050263 | 0.000000 |
| 0.448745 | 0.000019 | 0.000000 | 0.000184 | 0.000062 | 0.000000 | 0.016160 | 0.000302 | 0.101040 | 0.030455 | 0.000000 |
| 0.220048 | 0.000014 | 0.000000 | 0.000092 | 0.000031 | 0.000000 | 0.008064 | 0.000148 | 0.049887 | 0.022023 | 0.000000 |
| 4.073627 | 0.000374 | 0.000000 | 0.001691 | 0.000566 | 0.000000 | 0.148635 | 0.002742 | 0.927161 | 0.591799 | 0.000000 |
| 4.073627 |          |          |          |          | 0.002632 |          | 0.151377 |          |          |          |

| 40Ar(k)  | Additional Parameters |         |   | 40(r)/39(k) | 1 $\sigma$ | 40(r+a) | 1 $\sigma$ | 40Ar/39Ar | 1 $\sigma$ | 37Ar/39Ar | 1 $\sigma$ |
|----------|-----------------------|---------|---|-------------|------------|---------|------------|-----------|------------|-----------|------------|
| 0.000000 | 07C1767               | 400 °C  | ✓ | 9.585385    | 7.84835    | 0.05999 | 0.00006    | 302.63936 | 16.45201   | 12.59057  | 0.88440    |
| 0.000001 | 07C1768               | 500 °C  | ✓ | 8.183220    | 2.19654    | 0.04884 | 0.00062    | 61.38114  | 1.09801    | 19.70225  | 0.65034    |
| 0.000004 | 07C1769               | 600 °C  | ✓ | 6.119387    | 0.36781    | 0.14298 | 0.00066    | 31.96914  | 0.24638    | 25.08323  | 0.75313    |
| 0.000009 | 07C1771               | 700 °C  | ✓ | 6.250221    | 0.23761    | 0.10369 | 0.00062    | 11.26871  | 0.07328    | 26.12388  | 0.68642    |
| 0.000016 | 07C1772               | 800 °C  | ✓ | 6.391818    | 0.13089    | 0.16084 | 0.00062    | 9.72040   | 0.05444    | 26.51895  | 0.69876    |
| 0.000014 | 07C1773               | 875 °C  | ✓ | 6.354648    | 0.13031    | 0.11430 | 0.00065    | 8.30569   | 0.05329    | 26.82779  | 0.70818    |
| 0.000018 | 07C1775               | 950 °C  | ✓ | 6.290554    | 0.14201    | 0.15084 | 0.00063    | 8.36308   | 0.03851    | 26.90086  | 0.71927    |
| 0.000019 | 07C1776               | 1025 °C | ✓ | 6.151429    | 0.11250    | 0.15117 | 0.00066    | 7.95126   | 0.03754    | 27.20254  | 0.70422    |
| 0.000019 | 07C1777               | 1100 °C | ✓ | 6.227085    | 0.14451    | 0.17889 | 0.00063    | 9.53176   | 0.04112    | 27.07070  | 0.69878    |
| 0.000026 | 07C1779               | 1200 °C | ✓ | 6.048872    | 0.10542    | 0.20401 | 0.00063    | 7.87810   | 0.03054    | 27.62178  | 0.71618    |
| 0.000016 | 07C1780               | 1300 °C | ✓ | 6.252341    | 0.13023    | 0.13150 | 0.00062    | 7.98861   | 0.04685    | 27.25878  | 0.71627    |
| 0.000008 | 07C1782               | 1400 °C | ✓ | 6.186635    | 0.27340    | 0.07191 | 0.00006    | 8.75801   | 0.03844    | 26.79690  | 0.70699    |
| 0.000150 |                       |         |   |             |            |         |            |           |            |           |            |
| 1.519110 |                       |         |   |             |            |         |            |           |            |           |            |

| $^{36}\text{Ar}/^{39}\text{Ar}$ | $1\sigma$ | $^{37}\text{Ar}$<br>(decay) | $^{39}\text{Ar}$<br>(decay) | $^{40}\text{Ar}$<br>(moles) |
|---------------------------------|-----------|-----------------------------|-----------------------------|-----------------------------|
| 0.99532                         | 0.06013   | 12.24664637                 | 1.00089535                  | 6.071E-21                   |
| 0.18559                         | 0.00722   | 12.25084667                 | 1.00089547                  | 4.943E-21                   |
| 0.09445                         | 0.00124   | 12.25504841                 | 1.00089560                  | 1.447E-20                   |
| 0.02425                         | 0.00074   | 12.26328800                 | 1.00089584                  | 1.049E-20                   |
| 0.01865                         | 0.00037   | 12.26749401                 | 1.00089596                  | 1.628E-20                   |
| 0.01407                         | 0.00035   | 12.27153313                 | 1.00089608                  | 1.157E-20                   |
| 0.01450                         | 0.00041   | 12.28028913                 | 1.00089633                  | 1.527E-20                   |
| 0.01365                         | 0.00030   | 12.28433247                 | 1.00089645                  | 1.530E-20                   |
| 0.01871                         | 0.00043   | 12.28854569                 | 1.00089657                  | 1.811E-20                   |
| 0.01386                         | 0.00028   | 12.29680781                 | 1.00089681                  | 2.065E-20                   |
| 0.01346                         | 0.00036   | 12.30102531                 | 1.00089694                  | 1.331E-20                   |
| 0.01615                         | 0.00089   | 12.30929581                 | 1.00089718                  | 7.278E-21                   |

07C1767.AGE >>> MF9463 >>> HLP PROJECT

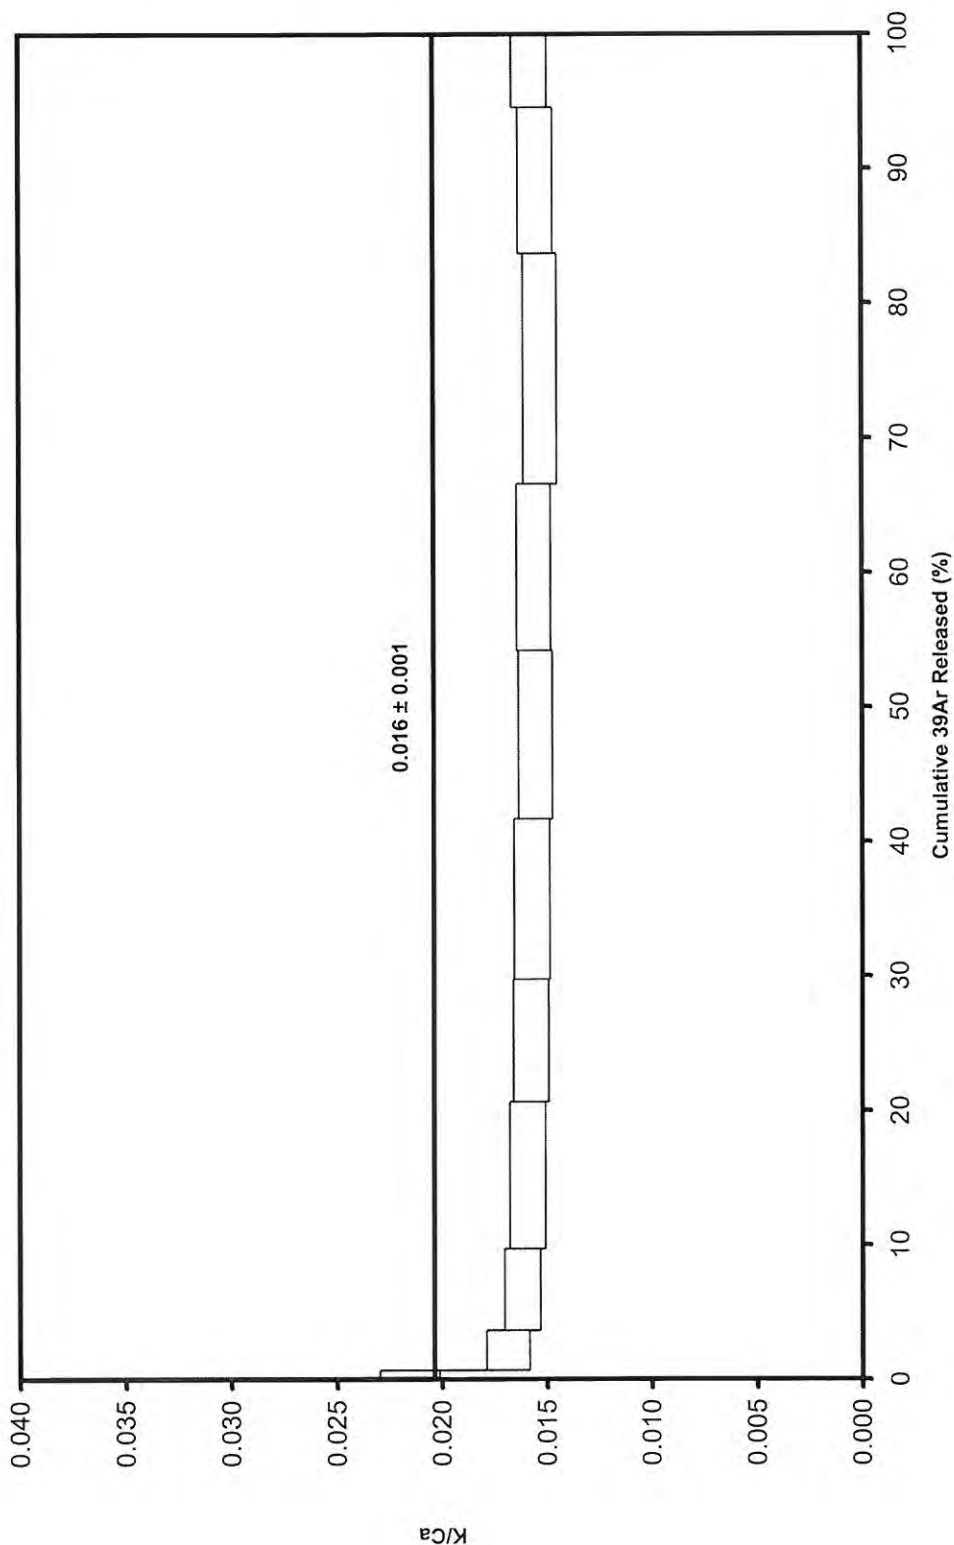

**Ar-Ages in Ma**

**WEIGHTED PLATEAU**  
16.45 ± 0.28

**TOTAL FUSION**  
16.48 ± 0.30

**NORMAL ISOCHRON**  
16.36 ± 0.34

**INVERSE ISOCHRON**  
16.40 ± 0.34

**Sample Info**

plagioclase  
Steens  
jh

IRR = OSU4E06  
J = 0.0014714 ±

DR2013250 Camp



07C1767.AGE >>> MF9463 >>> HLP PROJECT

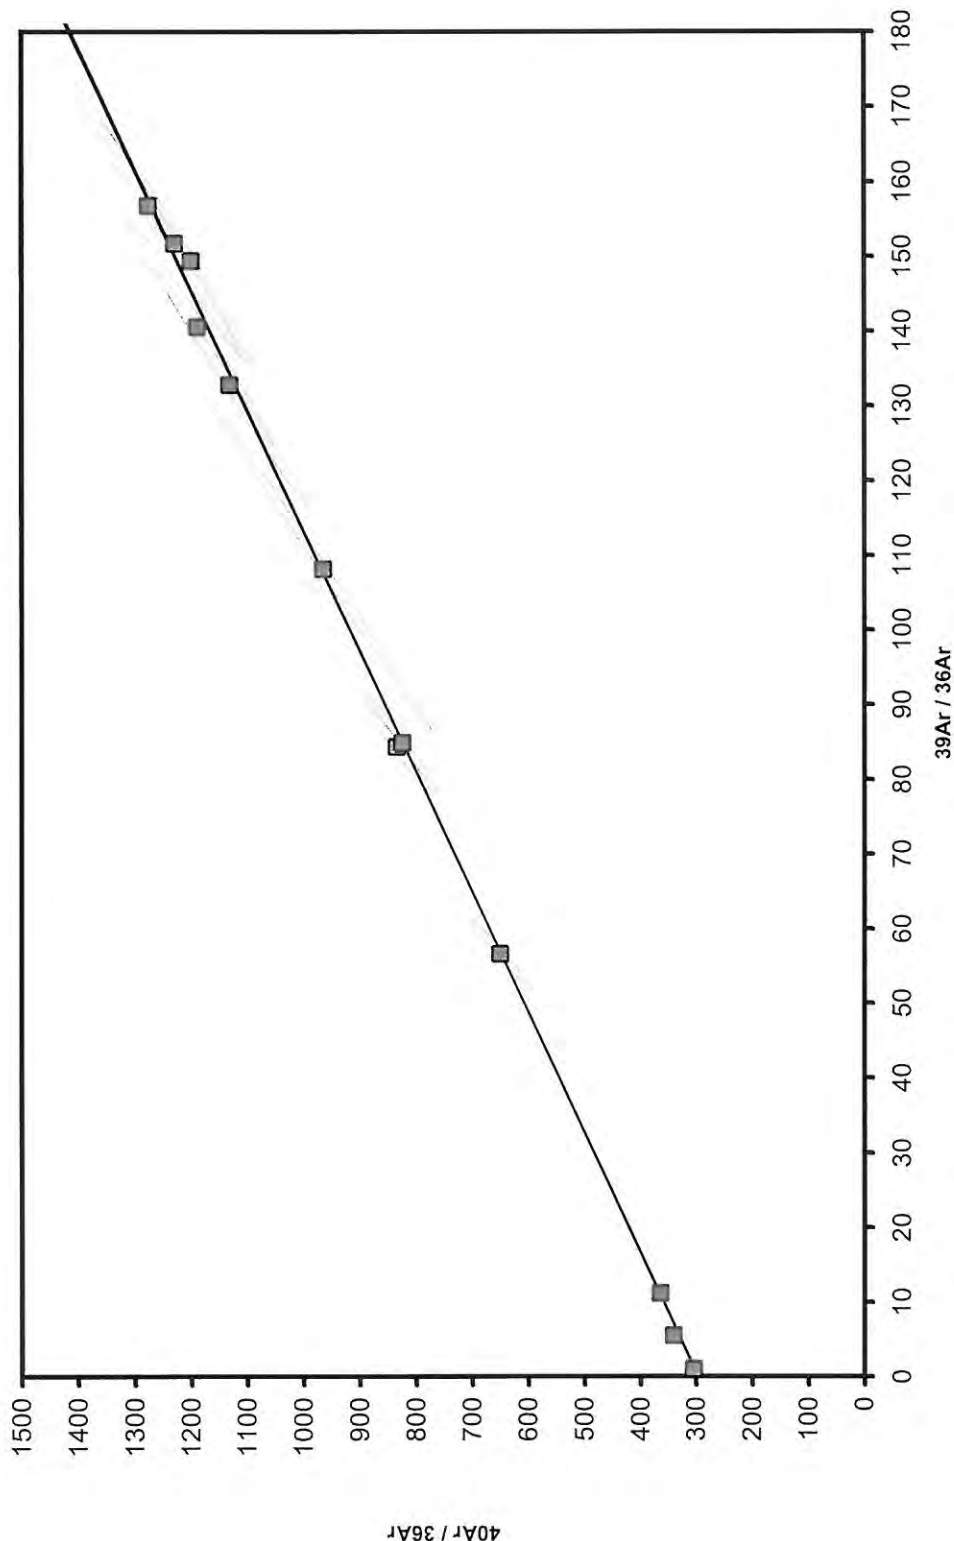

Ar-Ages in Ma

WEIGHTED PLATEAU  
16.45 ± 0.28

TOTAL FUSION  
16.48 ± 0.30

NORMAL ISOCHRON  
16.36 ± 0.34

INVERSE ISOCHRON  
16.40 ± 0.34

MSWD  
0.70

Sample Info

plagioclase

Steens

jh

IRR = OSU4E06

J = 0.0014714 ±

DR2013250 Camp

07C1767.AGE >>> MF9463 >>> HLP PROJECT

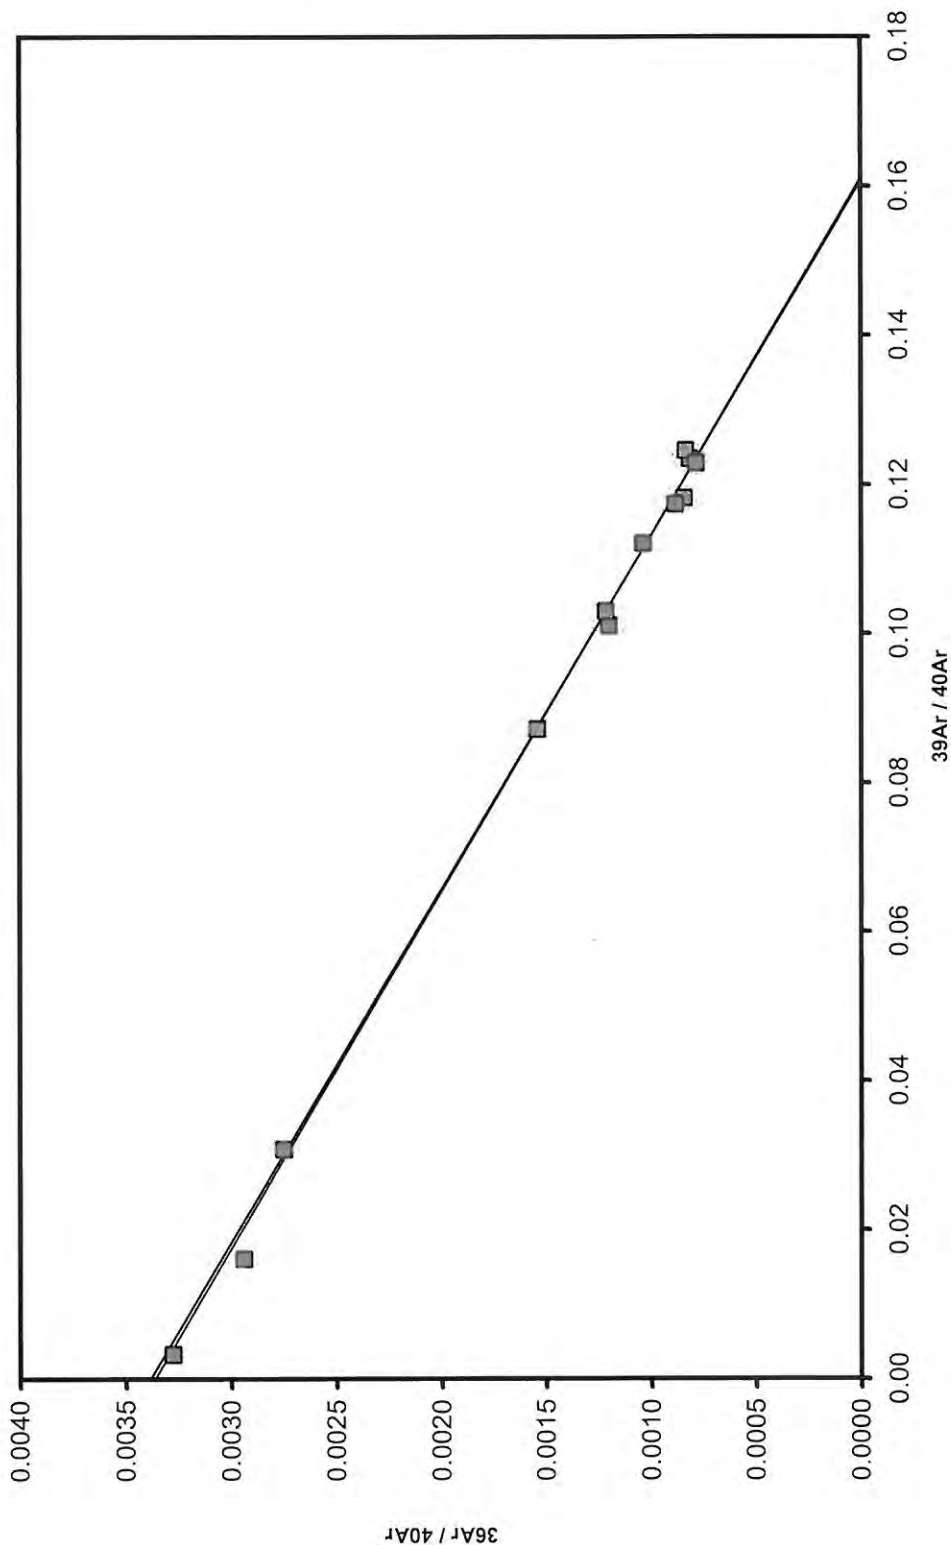

Ar-Ages in Ma

WEIGHTED PLATEAU  
16.45 ± 0.28

TOTAL FUSION  
16.48 ± 0.30

NORMAL ISOCHRON  
16.36 ± 0.34

INVERSE ISOCHRON  
16.40 ± 0.34

MSWD  
0.69

Sample Info

plagioclase  
Steens  
jh

IRR = OSU4E06  
J = 0.0014714 ±

DR2013250 Camp
